# Supplementary material for: The novel anti-CRISPR AcrIIA22 relieves DNA torsion in target plasmids and impairs SpyCas9 activity
Source: PubMed Central journal article supplement (PMC8545432; doi:10.1371/journal.pbio.3001428), 2021-10-13
Supplement: pbio.3001428.s013.pdf [file pbio.3001428.s013.pdf]

**S2 Table.** PC4-like proteins with structural homology to AcrIIA22

| Structural Homolog |                                                              | Function         | Similarity to AcrIIA22 |          |         |           |
|--------------------|--------------------------------------------------------------|------------------|------------------------|----------|---------|-----------|
| PDBID              | Name                                                         | DNA/RNA Binding* | Zscore                 | r.m.s.d. | n-align | % A.A. ID |
| 4bg7               | PC4 putative transcriptional coactivator p15                 | DNA              | 6.2                    | 2.5      | 54      | 15        |
| 3k44               | <i>D. melanogaster</i> Pur- $\alpha$                         | DNA/RNA          | 5.9                    | 2.6      | 47      | 9         |
| 5fgp               | Pur- $\alpha$ repeat I and II from <i>D. melanogaster</i>    | DNA/RNA          | 5.6                    | 2.1      | 48      | 8         |
| 3n8b               | Pur- $\alpha$ from <i>B. burgdorferi</i>                     | DNA/RNA          | 5                      | 2.8      | 48      | 6         |
| 2gje               | Mitochondrial RNA Binding Protein ( <i>T. brucei</i> )       | RNA              | 4.9                    | 2.5      | 52      | 8         |
| 5zkl               | Protein of unknown function SP_0782,<br><i>S. pneumoniae</i> | DNA              | 4.7                    | 3.6      | 52      | 12        |
| 5fgo               | <i>D. melanogaster</i> Pur- $\alpha$ repeat III              | No info          | 4.5                    | 2.7      | 44      | 14        |
| 1pcf               | Replication & transcription cofactor PC4 CTD                 | DNA              | 4.5                    | 2.5      | 45      | 7         |
| 2ltt               | Putative Uncharacterized Protein YDBC                        | DNA              | 4.5                    | 2.8      | 50      | 12        |
| 4bhm               | MoSub1-DNA PC4 transcription cofactor                        | DNA              | 3.9                    | 2.8      | 45      | 4         |
| 3cm1               | SSGA-like sporulation specific cell division protein         | No info          | 2.8                    | 3.7      | 47      | 13        |
| 1l3a               | Transcription factor PBF-2 (P24, WHY1)                       | DNA              | 2.8                    | 5        | 48      | 8         |
| 4ntq               | Anti-toxin CdiI, <i>E. cloacae</i>                           | No info          | 2.7                    | 3        | 49      | 12        |
| 3n1k               | WHY2 transcription factor, <i>S. tuberosum</i>               | DNA              | 2.6                    | 2.8      | 52      | 4         |

\*RNA/DNA binding data from (Janowski and Niessing, 2020).

#### Reference for S2 Table.

Janowski, R., and Niessing, D. (2020). The large family of PC4-like domains - similar folds and functions throughout all kingdoms of life. *RNA Biol* 17, 1228-1238.
