# Supplementary material for: The novel anti-CRISPR AcrIIA22 relieves DNA torsion in target plasmids and impairs SpyCas9 activity
Source: PLoS Biol. 2021 Oct 13;19(10):e3001428. doi: 10.1371/journal.pbio.3001428 (PMC8545432; doi:10.1371/journal.pbio.3001428)
Supplement: S3 Data — (FASTA) [file pbio.3001428.s019.fasta]

>4303_LiJ_2014__V1.UC63-0__bin.67_NODE_112_length_95405_cov_4.60675
CTGCCACTAAGGTGTAAACCGGCTGCGGGCGGCGTGGTCGCTCGCAGCATTTTTGCAGAGAGGAGGACGAGTGGAATATGGCAAAGGCAAAGATCAGCCCTATGATGGATCAGTATTTTCAGATCAAGAAGGACTATGCGGATGTGATTTTGTTCTTCCGTCTGGGCGATTTTTATGAAATGTTTTTTGATGATGCCAAGATCGCCAGCAAGGAGCTGGATCTGGTGCTCACCGGTCGGGACTGCGGCCAGGAGGAGCGGGCACCTATGTGCGGCGTGCCCTTTCACAGTGCAGACAGCTATATCGCCAAGCTGGTGAGCCGGGGCTACAAGGTGGCCATCTGTGAGCAGATGGAGGATCCGGCGCTGGCCAAGGGCATCGTTAAAAGAGAGGTTATAAGAATCATCACCCCCGGTACGGTAATCGAGGGCAATATGCTGGAGGACGGCGTCAACAACTACCTGTGCAGTGTGTTTGGCAGCGAGAACGGCGCCGGGCTTTGCTTTGCGGATGTGTCAACCGGCGAGTTTCATGTGACCCTGGCTACCGGCGAGGATGTGGAGAGCAAGGTGATCAATCAGCTGTCCACCTATTCTCCCAAAGAGGTGATCTTTGGCGGCACCGCTGCCGATTATGACCATGTGGTGCAGTTCGTTACTGCTCGGCTGGAGGCGTCCGTCGAGTATCCGGAAGCGGCGCTGTTTGATTTTGACGCCTGCTCCCAGGAAATTATAGAGACCTTAAAGAAGGATGAGATCGCCGCACTGGACCTGGGTCACAGCCGCGAGACGGTGTGTGCCCTGGGCGCGGTGATCGCTTATTTGAAGAATACGCAGAAGAAAGACGAGATCGAGACCCCGTCGGAAGTGGAGTTCTACGACAGCGAGCGGTTTATGCACCTGGACATCAGCGCCCGGCGCAACTTGGAGCTGACCCGCTCCATGATGACCGGCGACAAGAAGCATTCGCTGCTGTGGGTGATCGACAAGACCAAGACTGCCATGGGCAAGCGGATGATTCGTGCCTGGGTGGAGCGGCCGCTGCTGAGCGTCAGCCAAATCCTCCGTCGCCAAAATGCGGTGGGCGAATTGTTTGACCGCCCTATGCTGCGAGACACGGTGCGCCAGGCGCTGGTGGGTGTTAACGACATTGAGCGGCTGATGACCCGCATTGTGTACGGCACTGCCAATGCCAAGGAATTGCGGGCGCTGGAGAGCACCATTTCCGCCCTGCCGGAGATTAAGACTGCTTTGGCAGACTGCAACACCGCCATGCTGCGGGAAATTGAAAGCGATATTGACCTGCTCACCGATGTGGCAGAGGAAATTCGCCGGGCAATTGTGGAGGAACCGCCCTTTTCTATCCGCGAAGGCGGGTTTATCAAAGCAGGCTATAACGAAGAGATCGACAGCCTAAAGGCCATTATGACCGACGGCACCGGCGTGATTGCCTCCATTGAAGCGCAGCAGCGGGAAGAAACCGGTATCCCCAAACTGAAAGTGGGCTACAACCGGGTATTCGGTTACTATATTGAGGTGTCCAACGCATACCGGGACCAGGTGCCGGAGACCTACATCCGCAAGCAGACCTTAGCCAACTGTGAGCGCTACATAACCCAGGAGCTGAAAGAGCTGGAGGGCAAGATTTTAGGCGCCAAGGATCGGGAGGTGGCGCTGGAGTACCAGCTGTTCTGCGCTCTGCGAGAGGAGATCGCCGGTCAGATCCAGCGGCTGCAAGTGACCGCCAAGGCGCTGGCCCGGCTGGATGTGCTGTGTTCCCTGGCCCATGTGGCAGCAGAGCATAACTACACCTGTCCCCAGGTAGAAGGGGATGGCGTGATCGAGATCAAGGACGGCCGCCACCCGGTGGTGGAGGCACTGCTGGACAGCGGGCCCTTTGTTCCCAACGATACATACCTGGACTTGCAGGACGACCGGTGCCACATTATCACCGGCCCCAATATGGCAGGTAAGTCCACCTATATGCGCCAGATTGCGCTGATCACCCTGTTGGCGCAGATCGGTTCCTTTGTACCGGCGCGGCAGGCGCACATTGGCGTGGTAGACGCCATCTTTACTCGAGTGGGCGCGTCTGACGACCTGGCTACCGGCCAGTCCACCTTTATGGTGGAGATGAACGAGGTGGCCACCATTTTGAAAGACGCCACCCAAAACAGCCTGATTATCTTAGACGAGATCGGCCGGGGCACCTCCACCTTTGACGGTATGAGCATTGCCCGGGCGGTGCTGGAATATGTGTGCAAGCGCAAGACTCTGGGCGCCAAGACGCTGTTTGCCACCCATTACCATGAGCTGACCGCCATGGAGGGGCTGGTAGACGGTGTGCGCAACTACTCCGTAGCGGTGAAGAAGCGGGGAGACGATATTACTTTCCTGCGGCGGATCGTGCGGGGCGGCGCGGACCAGAGCTTTGGTATTGAAGTGGCCAAGCTGGCCGGTGTGCCGGACAAGGTGGTGCGTCGCGCCAAGGTGATCCTCAAGGAGTTGGAGAAGAACAGCGTGCCTATCGAGTTTAAGGCGGAGGAAGCCATAGAGGAGGAGCCGGAGGAGGAAATTCAGTACAATTTCACCGCCAACGGCACCAACGAGATTTTGGAAATTCTAAAGACCGTAGACATTAACACTTTGACTCCGATTGAGGCTATGCAGACCCTGGATAACCTGCGCAAAAAGGCCCAGGAACTTAGCTAAAAACGGATTTCATTATAGAAAGGGCGGTGGTTCCATGCCGCAAATTCATATTTTACCCAAGTCTGTGTACCAGCTAATTGCAGCCGGCGAGGTGGTGGAACGCCCCGCCTCTGCAATTAAAGAAATGGTGGAGAATTCCATTGATGCCGGAGCTACCCGCATAACGGTGGAGATCCAGCATGGCGGCTCTACCTATATGCGCATTACGGACGACGGCTGTGGCATCGCAAGGGCGGATGTGCCCAAGGTGTTTATCAGCCATGCCACCTCCAAGATCGCAACCGAGGAGGACTTGAACGCCATCGGCACCTTGGGCTTTCGGGGCGAGGCCATGGCTTCCATCGGCGCAGTGGCGCAGGTGGAACTGCTCACCCGCACAGCAGAGGAGCAGGTGGGCACCCGCTATGTGATCGCTGGCGGCCAGGAACAAAGCTGCGACGACGCCGGTTGCCCGGTGGGCACCACAGTGGTGGTGCGGGACCTGTTCTTTAACACGCCTGCGCGCATGAAATTCTTAAAGAAAGATGTGACCGAGGGCAACGCGGTGGCCGGTGTGCTGGACGCGGTGGCGCTGAGCCACCCGGAGATCGCCTTTCGCCTGATCCGGGACGGCAAGCAGACGCTGGTGACTCCCGGCAACAAGGACTTAAAGAGCACGGTGTACTCCGTGTTTGGCCGAGAATTGACCCAGTCGCTGATCCCGGTGCATTACAGCTATAACGGTATGGAGCTGGAGGGCTATGTGTCCAGTCCCCATGCCTCCCGCAAAAGCCGGGCTATGCAGTATTTTTTCATTAACGGTCGCCTGGTGAAGTCTAAGACCGCCTTGGCGGCGCTGGAGCAGGCGTATAAAAACAGCATTATGGTGGGGCGTTTTCCCGCCTGCGTGCTGAATATGACTGTCAACACGGCGCTGGTGGATGTGAATGTGCACCCGGCCAAGATCGAGGTGCGCTTTGCCAACGAAAAGCCGGTGTTTGACCTGGTGTATTATGGGGTCAAGACCGCTATTGAGACCGGCGACAGTGTAAAGGAAGCGACCTTTGGCGGCACCCCCGCAGCGGACGAGGTGGGACGCGCGTACCCGCCGGCAGGCAGCCGCAGCGCCAAGATCGACTTCTTCCGCAAAAAGGAAGAGAGCGTGCAAACGGTGCTGCAAACAGCGCCCCGCACGGACTTTTGGCAGACGGCGCAGGCAGGTGTGCCGTACCGTACCGCGCCCCAGGGGCAGACCCCGGTGCAGCGGGCGACAGCGCAAAGCGCAGCGCCGATGGCGCAAGAGCCGGCACCTGTAAAAGTGACCGAAATAAACGCCTCGGAACCCCAGGCCGCGCCGGTGGTACAGAGTGAGCAGAAAGTGCCCGCCCAAGTGTCCCCGGCAGTGCCTACGCATGAGAGCGCAGAGTCCGCAGCGTCTGCACCGCCTTCGGCGGAGACAGCACCTGCCCCCACGGTGCAGGTGGTGGACGAGGACCGGAAGACCCCGGCCTTCCGTGTAGTGGGCGAAGCCTTTAAGACCTATATACTTGTAGAGATAGAAAATAATTTATATTATATTGACAAGCACGCCGCCCACGAGCGGATGAATTTTGAAGCCCTGCGCCGGAACGCGGAGGTCCACAGTCAGTTGCTGCTGGCGCCGGTGACCGTGCGCTTGAACAAAGCGGAGCTGTCTGCCGTGGAGGAACATCTGGATTTGCTGCAAAAAGGCGGCTTTGAGGTGGAGATCTTTGGCACGGATGCGGTGTTGGTGCGATCGGTGCCCGCTATGCTGGACGGGGCAAATATTGCCGACCTGATCTGCGAGATTGCAGAGAAGCTGCTGGAGCACAAAACGGACATTGAGCCGGAAAAGTTGGACTGGATCTTCCATTCCACCGCTTGCCGCGCAGCGGTCAAGGCCGGTGATGTGACCAGCCCGGCGGAGCAGCGCCTGTTTGTTGAGAAGCTGCTGTCCATGCCGGATATTCGCTACTGCCCCCATGGGCGGCCGGTGATGATCAAGGTTAGCCGGTACGAGATCGAAAGACAGTTCGGCAGGGCGTGAGTATGAAGACAAAGGTTCTTGTGGTGGCCGGCCCCACCGCCTCCGGCAAAACCGGTTTGGGCATTGCCCTGGCTCGGCGGCTGGACGGCGAGATTGTGTGTGCCGACTCTATGCAGATCTATACCGGTATGCCCATTGCCACTGCGGCACCTACGGCAGCGGAGCGGCAGGCAGCGGTGCACCATTTGGCAGAGATTCTGCCCCCGGACACGCCTTTTAGCGTGGCTCAGTATTGCAACCTGGCAGCGGAGACGGTGGCGGATATTGCCGCCCGGGGTAAGGTGCCCGTTTTGGTTGGCGGCACCGGGCTGTTTATTGACAGCTTTATTGACCACATTCAGTTTGCCCATGTGCAGACGAACCCGGACCTGCGCCGGGAGCTGCTGGCAAAGGACGGCACAGAGTTGTACCGTACCTTGCAGCAGGTGGATTCTACGGCTGCGGCAGAAATACATCCGAATAACAAAAACCGGGTGGTGCGTGCACTGGAGCTGTACTATGCCGGTATTACCAAGACTGCACAGAATGCAGCCTCCCGCCGGGAGGACAGCCCTTATGAGGCACTGTATTTTGTGCTCTGTTACCGGGATCGGCAGGTGCTGTATGATCGGATCAATGCCCGGGTGGACGCCATGCTGGCCGCCGGATTGGTGGAGGAAGCACGGCAGGCCTACGCCGCTTGCGGTCCTACGGCACGGCAGGCCATTGGGCACAAGGAACTGCTGCCGTATTTGGAGGGCAGCGAGCCGCTGGAGACGGCGGTAGAACGGCTCAAGCAGGAGACCCGCCGCTACGCCAAGCGCCAGATCACTTGGTTTAAGCGCCGGCAGGGCACTGTGGTGCTGGAGCCGGATACCATGGATACAGAGCGCCTGATCGCCGTAGCGACGGCGCAGGCAGAGGATTTTCTTTATGGCAAAGACAAAGGAAAAAGAGCATAAAAGCCGTAAAAAGCTCAGTCGCACCGCCAAGGAGAACTGGGCCATCGGCATTGTGGCGCTGCTGATTTTGTCTGTGGTGGTGTATGAGTGCTATACTGCTACCCATGTGCGGCTGCAAACCTACACCGCCAAGGAGACCACCGTGTACCGTACCATTGAGACCACGGCACTGGCGGTGCGAGAGGAACACACGGTTAGCGGCCCCGGCGGCGTGACGGTGCAATGCGTTGCCGACGGCCAGAAGATTGCCAAGGACGGCAAGGTGGCTCTGCGCTTTCAGTCTGAGGCGGACGCTAAGGCGTACAGCCAGCGCACCGCCTTAAAGGAGAAGTTGCAGCACTACCGGGATATGGAAAATAAGAGTACCGCCACCGCCACGGATATTACCGCCGTGGACAATGAGGCGGTGCAGAATGTAAATGATTACATACGGGCGCTGGCCCAATCGGATCTGACCGGGGCAAGTACCGCGGCGCAGGAGATGAACGACACCTTTACCCGCCGCCAGATGATGATCGGCACCAGCATTGACTTTGCGGCGCTGAAAAAGGATTTGCAAAGTCAAATGGACGAATTGGGCACTGCAGAGCCTATTGGCTCCGTGACTACGGCGGTAAGCGGCGTTTTCTCCGGCTACACGGATGGGTGCGAAAGCGTTTTTGATTATGATCAGGTGACGGAGATGACCGCTGCCGATCTGGATAAAGCCTTAAAGACTGCCGAGAGTGCCAAGGGCGACACCGGCGCCTTAGGCAAAGTGATCACCAGCTATGCTTGGTACTTTGTGTGCAAGGCGGATGTGGCGGACCTGCAAAAGGTGCAAAACGGCACGCGACTGGATGTGGCTATTAAGGACAGCGACCGGGTACTTTCCTGCACCGTGGTCAGCGGCGCAGACACCAAGCCCGGCGCCACGCAAACGGTTTTGGTGCTCCAGTGTGAGAATATGGACTCGGATATTGCCGCCTATCGGGCGGAGGATATAGAAATTCGCACAGCTTCCTATACCGGGATCAAGGCCCCCGCTGCCGCCGTGCATGTGAGCGACGGTAAAAAGGGCGTGTATGTGCTGGTGGCCGGACAGGTGAAATTCCGTCCCGCCACGGTGCTGTATTCCGGCAAGGATTATGTAATACTGGCGTATGACGCCCAGAATAAAGACGGTATTCGCCTTTATGACGAGATCATCACAGAAGGGAAGGATCTTTATAATGGAAAAGTTTATACCTGATCCGGCACGGCTGCAAGCCGTTGAGGAGAACTGGAAGCGGGTCTTAGATCGGGTGCAGGAGGGCGCCGTCAAAAGCGGCCGCGATCCCCGAGAGGTTCGCCTGATGGCAGTGACCAAGACCGTGGAGCCGGTGTACATTAACCGGGCGCTGGATCTGGGCGCCGATTTGATCGGCGAGAATCGGGTGCAGGAATACCTGGGCAAGCGGGATGCGTTGCACTTGGATGGGGTGGAAAAACACCTGATCGGTCGACTTCAGACCAATAAGGTTAAGTATATTGTGGGTCAGGTGGATATGATCCAGTCTGTGGATTCTATGAAGCTGGCCCAGGAGATCTCCAAGCAATCCGTGAAGCACGATGTAACCACCAATGTATTGGTGGAGGTGAACATCGGCCGGGAGGAAAGCAAAAGCGGCATTATGATCGAGGCATTGCCTCAGCTGCTGGAAGAAGCGGCTCAGTTGCCCGGTTTACAGATCAAGGGCTTGATGTGTATTCCCCCCATTTGTGAGACGGAGACACAGGTGCGCAAATATTTTGAGACAATGCATCAATCTTTCATTGACATTAAAGACAAAAAACACCATAATATAGACATGGATATTTTGTCTATGGGTATGAGCGGCGATTTTGAGGCCGCCATTGCCGAGGGTTCCACGCTGGTGCGTGTCGGCTCTGCCATCTTCGGCGCCAGACAATACCGTTAAGGAGAGGCGAATATGGGTTTACTGGATAAGTTCAAAGAGATCATTACCGAGAATGATGATGATTTTGACGATTACTATGACGACGACAACCGGGACTACGGTCTGGCTGCCCCGGAGCGGGCAGAGCGACAGGAGCGCCCCCGGCACGAGCGGGCGCCTAAGCCGGAGCGCCAGGAACGCCCTCGCAGCAGAGGACGGGACGATAAGGTGGTCAATATCCACACCACCACCCAGTTGCAGGTGGTGCTGGTGAAGCCGGAGCGGTTTGAAGAGGCTGCCTCCATCGGCGACAATTTGAATGCCAAGCGTACGGTGGTGTTGAATTTGGAGAGCACCAACCGAGATATTGCACGCAGACTGCTGGATTTCCTCAGCGGCGTGGCGTATGCCAACAACGGCCAGATCAAGCGGGTAGCCAACAGCACCTATATCATTACGCCTTACAATGTAGATGTAATGGGCGATCTGATCGATGAGCTTGAGAACAACGGCATGTTTATGTGAGGAGAGAAGGAGAGAGAATATGATTACACCCAGCCAAATTCGAGAGAAAAATCTGTCTACCGTGCAAAGCGGCGGATATGATAAGGAAGAGGTCAATGCCCTGCTGGCCCAGATCGTCGAGTCTTACCAGGCTGTGTACGATGAGAACAAAGAGCTTTACCGCAAAATGGAAATACTTGCCGGCAAGATTGAAGAGTACAGAAATGAAGAAGACTCTATCAAGACCGCACTGATCACCGCCCAAAAGATGGCGGATCGCATTGCCAAGGACGCCAAGGAAAAGGCGGAGGAGAAGCTGAGCGCAAGCGCAGCCACCGCCCAGCAGACGGTGACGGACGCCAAAGAAAAAGCGGACAAGATGGTGGCCGAGGCTCGCACCTATGCCGCCAACTTTACCAAGGAGAAGCAGGACGCTGCCGAGTCCATTATTACCGAGGCGGAGGCCAAGGCCAACGACGCCATTGACGGCGCCAAGGTTGTGGCTCAGGAAATGCTCAACCAGGCCAAGCAGCTGTCTGAGGAGCTGATGAGCAAGGCGAAGAGCGAAAAAGCCTATCACGAGCAGCTGATTGAAAAGCTGCGCAGCGAGTCCAAGAGCTTTAAGGACAGCTTGCTGTCCCTGTATGAGAGCCAGATGGATCGCCTGGGCGATATGGTGGATTTGAAGCCCCAGGTGGACGAGGATCAGGCGCACATTGACTCTGTGGAGAGCGAGATGAACCAGATCATCTCCAATATTGATGAGATCAACAAACTGCAAAGCCAGACGGTCGACGCACCGACGGAGGAAGCCGCGGCACAGGCGCCGCCGGCAGAGAATACCAAGGGCGACACAGACGATGACCAGGTGGATCAGATCATTGACGAGATCGAGGAGAAGCAGGCGCCCGCAGCCAGCCCGGAGGAGGTCAGCAGCGCGCTGAACGCCTTTACCGAGGACGAAATCACTCCGCTGGACGAGAACGCCGCCACCATCAGCGAGATCGACGAGGAGCCGGAGTTAGAGCAGGTACCCCCGCAGCAGGAGGAAAAGACCTTGTTTGACGACCAGGCTGCTATGCCCTTTGAGGATTATTTTCATGTAAAGAGCGGCGACGAGCGCACCAGTGAGACCATTTCCCTGACCGCTCCGGACGAGGACGAGTATGAGGAGGAAGAGGGCTCTTCCAAGCTGCGCGGTTTCTTTAAGAAGAAAAAATAATTTACATACACAGTAGGAGTAACAAGAAGCATGGATTATAACCAAACACTGAATTTACCCAAGACCGACTTTCCCATGCGGGCAGCTTTGCCCCAGCGGGAGCCGGAATTCTTGAAAGCATGGGAAGAAAACGATCAGTACCGTCAGCTGATGCAGCACAACGAGGGCAAGCCTCTGTTTGTGCTCCACGACGGACCTCCGTACGCCAACGGTGATATTCATATCGGCCACGCCATGAACAAGACCTTAAAGGACTTTATTGTGCGCTACAAGAATATGACCGGATTTCAGTCTCCCTATGTGCCCGGCTGGGATACCCACGGCCTGCCCACAGAGCTGAAAGCCAGAAAGCAGGCGGGCATCGGCGCCGGCAGCGACATTTCCGATCTGGAATTGCGCAAGATTTGCCGAGAGACCGCGCTGAGCTATGTGGATATTCAGCGGGAGTCCTTTAAGCGCCTGGGCGTAATCGGCGAGTGGGATCACCCGTACATTACCCTGACCAAGGATTTTGAGGAAGAGCAGATTAAGGTATTTGCTACCATGGCTTCTCAGGGCCATATCTACAAGGGCTTAAAGCCGGTGTATTGGTGCCCGGACTGTAAGACCGCCCTTGCCGAGGCGGAGATTGAGTACGGCGAGGATCCCTGCCATTCTATTTATGTCAAGTTCCGTGTAACGGACGATATGGGCAAGCTCACTGCACTGGGTGCGGACCTGAGCAAGACCTATTTCGTGATTTGGACCACCACCACCTGGACCCTGCCGGCCAACGTGGCCATCTGCGTAGGCCCCAACTTTGAGTATTCTCTGGTCAAGAGCGGCGACGAGTTTTATGTGATGGCTACCGACCTGGTAGACGCTGCTATGGCGGACCGGGGCACCACGGACTATGAGACCGTGGGTGTGATCCAGGGCAGCGAGCTGGAGTATATGAAAACCCAGCACCCGTTTATTGACCGCACCTCTTTGGTGATCGTGGGCGATCATGTAACGCTGGAGAGCGGTACCGGTTGCGTACACACGGCACCGGGTCACGGTGTGGATGACTTTATCGTGTGCCAAAAGTACCCGGAGATCCCCACCGTTGTACCGGTGGATGCCGAGGGCAGACTGACGGAGGAGGCCGGACAGTTCGCCGGGCTGACCACCGATGAGGCCAACAAGCCCATTGCGGAGCATTTGGAAAAAATCGGCGCTTTGTTTGCGCTGAAAAAGATCGTCCACCAGTATCCCCATTGCTGGCGTTGCCATAAGCCCATCATTTTCCGTGCCACCTCTCAGTGGTTCTGCTCGGTAGATGATTTTAAGGAAGCTGCTGTGGCTGCCACCGAGGATGTGCAGTGGTATCCGGCCTGGGGCAAGGACCGTATGCAGTCCATGATCCAGGAGCGCGCCGATTGGTGCATCTCCCGTCAGCGTAAGTGGGGTGTGCCCATTCCCGTATTTTATTGTAAAGACTGCGGCAAGGAGATCGTGGATAAAGATCTGATGCTGCGGGTATCTAAGATCTTTGGTCAGGAAGGCTCTGACGCCTGGTTCGCCCACGAGGCGGAATATTTCCTGCCGGAGGATTATAAGTGCCCCCACTGCGGCGCACAAAAGGGCTTTGAAAAAGAAAGCGACATTATGGATGTGTGGTTCGACTCCGGCTCCAGCCATGCAGCGGTGCTTAAACAGCGCCCTTATTTGAAGTGGCCGGCAGATGTGTACCTGGAGGGCGCCGACCAGTACAGAGGCTGGTTCCAGTCCTCTTTGCTCACCAGCGTAGCCGCCGGGCAGCCTGCGCCCTTTAAGCAGATCATCACTCACGGCTGGACCGTAGACGGTGAGGGCAAGAAGATGAGTAAGTCCCTGGGCAACGGTATTGACCCGGCGGACATTATCAACCAGTACGGCGCGGATATTCTGCGTTTGTGGGTGGCTTCTTCTGATTACCACGCCGATGTGCGTATCAGTAAGGAGATCTTGAAGCAGCTGTCGGATAATTACAGAAAGATCCGCAACACCGCTCGTTATTGCCTGGGCAACCTGTATGACTTTGACCCGGACAAGGATATGGTGTCCAACGATCAGTTGGAAGAGCTGGATAAATACGCGCTGATGAAGCTGGACCAGGTGCTGGCTACCGCTCGCGGCGGGTACGAGGTGTACGAGTACCACACCGCCGCCCACGCGCTGCACAACTTCTGCGTAGTGGATATGAGTAACTTCTACTTTGATGTGCTCAAGGATCGGCTGTACACTTCTGCGCCGAACAGCGCTACCCGCCGTGCCGCCCAGACCGTATTGTATAAGGTGCTGGACGCACTGACCTTGGTGCTGACTCCCATTTTGGCCTTTACCTGTGACGAGATCTGGAAGGCAATGCCCCATGCAGCGGGCAGAGATCCCCGGTCTCCGCTGTTTAACGATATTCCCAAGCCGGCGTACATTGCTGCGGACGCGGACTTTATGGCCAAGTGGGATCGGATCCATCGGATTCGTGAAGATGTGCAGAAGGCACTGGAGCTGGCTCGTAAGGACAAGACCATCGGTAAGTCCTTGGAGGCCAAGGTGACCCTGTACGCTGCGGGCGAACTGCACGATTTCTTGCAGAGCGTAGAGAGCCAGCTGCCGGAGATCTTCATTACCTCCGCTGTGGCACTGTCCGACGGTGAGGGCGACTTTACCGGCGAGGTAGAGGGGCTGAGCGTGTCCGTATCTAAGGCAGACGGCGAAAAGTGCGAGCGCTGCTGGAAGTACGATGAGACCGTAGGTCAAAACGCAGAGCATCCCACCCTGTGCGCCCATTGTGCGGCTGCACTGGCAGAGATGGACAAATAAAGAACGACCCATACGGGGGCAGATGCGACTGCTCTGCCCCCGCCTTTTTATATACGGAGGGTTTATGAAGCATAGAAAAAAACACATTTGGGCCTCCATTATGATCCTGCTGATCGTGGCTTTCGACCAGGTGACCAAGCGACTGGCGGAAAGTGCGCTGATGGGGGGCAAGATTGTTACTTTGCTGCCCGGTGCGGTGCAGTTGCGCTATGCCCGCAATACCGGGATGGCCTTTAGTCTGTTCAGCGGTGCCCGGTGGGTGTTTGTGGCGCTGACCGCTCTGGTGTGTGCCGGTGTGCTTTTTTATATGTTTCGCAACAAATGCCGCTCCCTGTGGGGCTACTGGAGCCTGGGGGTGCTGGTGGCCGGCGGACTGGGCAATCTGATCGACCGGGTGCTGTACGGCTATGTGATTGACTTTATTGAGCCGACTTTTATGCAGTTTGCCGTGTTTAATATTGCGGACTGCGCTGTGACCTGCGGCGGCATTAGTTTTGTGCTGTGGCTGGCAGTGGATCTGTTCCGCTCCGGTGACGGCAAGAAGGGAACGACCCATGACGGAAAATGAGCGGCAGCCGGTGCGTGCCTTTACCGTGGACGAAACAGCGGCAGGGGAGCGACTGGACAAGTTTTTAAGCACCATGTGTCCGGATTTGACTCGGTCGGCGGCGGCTCGTGTGATCGAGGAGGGCGGCGTACTGCTGGACGGCTCTCCGGGAAATAAAAAAGACAAGCTGCGCCCGGGCACCCGGGTGGAGCTGCGCCTGCCGGAGCCAAAGCCCATGGAGGTGCTGCCGGAGCATATCCCCTTAGATGTGGTCTACGAGGACGACGACCTGCTGGTGGTGAACAAGCCCAAGGGTATGGTGGTGCACCCGGCACCGGGAAATTATACCGGCACGCTGGTGAACGCGTTGCTGTACTACTGTGGCGACTCCCTTAGCGGTGTGGGTGGCGTGATCCGACCGGGGATCGTTCATCGGATTGACAAGGATACCAGCGGTCTGCTCATGGTAGCCAAGAACGACTTTGCCCATGTGGATTTGGCACGTCAGATTCAGGAACACAGTTTTCACCGGGCGTACCAAGCGGTGGTGTACGGCAATGTGACCGCAGACAGCGGCACGGTGTGCCAACCCATCGGTCGCAGTCCCAAGGATCGCAAAAAAATGGCGGTGACCCAACAGAACAGCAAGCCGGCCACCACCCATTATCGTGTGTTGGAGCGATTTGGGGACTTTACGCATATTCGCTGTGTATTGGAGACCGGACGCACCCACCAAATTCGGGTGCACATGGCCTATATCGGTCACCCGCTGGCCGGAGATCCGGTGTACGGACCGCGGCGTGTGATCACCTCCCTGGGCGGGCAGTGCCTGCATGCTGGGGAGATTGGCTTTATACATCCCAGAACCGGGGCGGAAATGCGGTTTGAAGCACCGCTGCCCCCGTATTTTACATCATTTTTGCACACTTGCAGGGAAAAGAAAAGGTGAGCGTATGAGTCAAAAGGATTTTAGCAATTGGCTGGTGGTGTCAGATATTGACGGCACATTGAATAACAAAGCACGCAAGCTGCCTCGGCGTAATTATGACGCCATTCAGGCGTTTACAGAGGCGGGGGGCAACTTTACCTTGGCTTCCGGACGGCTGACCTCCAGCTTGAAGCGCAATTACGATCGTATCACCCCCAATCAACCGGCGGTGGTACTCAACGGCGCGGGTATTTATGACTTTCAGCAGGAGAAGATGATTTGGCGCAGCACCATTCAGCAGGAGGGGCACGAGTTTGTGCGCTACATCATCAATAAGTTCAGTGACAGCTTTAAGAGCGTGGATGTGGGAATATATTTTGACGATTATGTGTATGTCGTCAAAAACGGCGTTCTGTCCCAGGGCACCATGGATATTGATAAGGCGCACTACGAGGTGACCTCCATTGATAAGGTGCCCAAGGAGGGGTGGATGAAGGTGATCTTTTGGTCCAATCCCATTACCATGAACCGGCTGCGCTATGTAATTGACCGCAGCGACACGGCAGGTATGAACTTTATGGCCTCCTCTCCATGGAGTATGGAGATGCTGCAAAAGGGCACCCACAAGGGTACGGCCATTATGGTGCTGGCAGATATGCTGGGCATTGACCGGAACCATGTGGCGGCCATCGGCGATTATTATAACGACTGGGATATGCTCAAGACCGTGGGATTGCCGGCCTGTGCCGGTCAGGCACCTAAGGCCATTCATGAGATTTGCCAGTTTGAAGCCTGCCACTGCAACAAGGGCTGCGTGGCGGATTTGCTGGGGTATATTATGTCCGGTCAGGCGGAGCAGCACATTGCTCGTCCGACCCTGCTGCGAGGATAAGAGATGTTGATTTTAGGCGCACATTTAAGTGCAAGCAAGGGCTATGTCCACATGCTGCGACAGGCACAGTCCATTGGTGCCAATACTTTTCAGTTCTTTACCCGAAATCCCCGGGGCGGTGCCGTAAAGGCTCAGGATCCGGCGGATGTGGCTGCCTTTTTGCAGGGGGCGCAGGCTGCGGACTTTGGCACGGTGCTGGCCCATGCACCGTATACCATGAATTTGTGCAGTGATAAGGAACGCACCCGCACTTTTGCCAGAGAGGTGTTTGCCGATGATCTGCAGCGGCTGGAGGCTCTACCCGGTACGCTGTATAACTTTCACCCCGGTTCCCATGTGGGGCAGGGGACGGATAACGGGATTGCCTATATCACCCGGGCGCTGAACGACCTGCTGACCCCGGAGCAGCATACCACTGTACTGTTGGAGACGATGGCCGGTAAGGGCAGCGAGGTGGGCGGCACCTTTGAGGAGTTGCGCCGCATTATAGACGGTGTGCAGCTGCAAGACAAGATCGGCGTGTGCCTGGATACCTGTCATGTGAGCGATGGCGGGTACCCTTTGGCAGAGGATTTGGACGGGGTGCTGACCCAGTTCGACCGGGTGATCGGCCTGGACAGATTGCGGGCACTGCACCTGAACGACTCTAAGAATCCTTGCGGTTCCCATAAAGACCGACACGAGCAGATCGGTAAAGGCTTTTTGGGTATAGAGACCTTCCGCCGCATCGTCAACCACCCGGCGCTGCGGGGACTGCCCATGTTCTTAGAGACCCCCAATGACTTGTCCGGCTACCAAGAGGAAATTGCCCTGCTGCGCAGCCTGGAGCAAACGTCAAAGTAAAATGAACATAAGAAAAAACACGGCTTCTGTCAAAGAAGTCGTGCTTTTTTATACGCTTTCAGCAGCCCAGCAGGGTGTGGGCATTTTGAATTAAGGCTTGCAGGGCGCTGTCACCGAATTTTTTGACGATCACGGCGGCGCCGTCTGCATAATCCGGTGGGCGGGAGCCAAGGTTGTGACAGTCGGAGCCGATCAGGTCAATGCGCCCGCTGTCCAGATACTTCAGCAGTTTGCGCCGCGCCCCGAAGGAGGCGTTTGCAAAGGCGCTGATGTTTACTTGGGTGGCGCAGCCCATATCTCGCAATTCGTCAATTAAACCGGGGTGATCCATCAGCGCTTTGTATCGCTCAATGTGCGCCAAAATAGGCCGTATGCCGTGGTCGCAGGTCAGCGCCGTGATCCGATCCAGGGTCTCCGTGCCGAAGTTGTCGCTGAAGTTATGCTCCAGCAGGGCGCACCGCGTGCCTGTGATACAGATGGGGGTCAGGTCTGCATTGTTCATCAGATAGCGGCTTACATACACCTCTGCACCCAGCAGCAGCCGGGGCGCGTCTGGGGGAAGAGCAGCCTGCAAGTTGGCAAAAGCCGCGTTCCGTCGGGCGGTAAAGTCCGCCAGAGAAATAGAATCCGAGTAATAATGGGGTGTAAGCACTACGGTCTCTGCCCCTTGCTGAGCCAGGCGACGGAGCATTTTTAAGCTGGTCTCCGTATCTTTGGAGCCGTCATCCACGCCGGGGAGAATGTGGCAGTGCATTTCAATCAAGCCGGGGATCACCATAGCATCACCTTATCCGATTATTCTGCGCCGGCGTCATACCCGTAACCGTAGCCATACCCATAGTCATAGCCGTACTTGTAGCGGGAGTAGCGAGAGCGCTTATCTTCTGCAAAATTGTAAATAAAGCCAAGCACCTTGGCGTCAATGAACTCCAGGGATTCCATCACCTTTTGCACTTCCGGGTGGGTGGAGCCGTTGGCACGCACCACGATCACCACGCCGTCGGACTCCCGGATAATGGGCAGGGCGTCAGACACCACATTCAGCGGCGGTGTGTCAATGATCACATAGTCATAGTCCCGACTGATCTGCAGCAAAAACTCAGCCATGGGCTCGCTGCCCAGCAGCTCTGCCGGATTGGGTGGAATGGAACCGGCGCACAGCAGCGATAGGTTGGGAAATTCTGTTCTGTGAATAATGCTGTACAGGTCCGTCTTAGGGCCGTTGTTTTTTACCGAGTCACTGATGTAGTTGGTCAGTCCCGGTGCATTGGACACGCCAAAGTAGTGGTGCATCTTGGGTTTGCGCAGATCGCAATCAATAAGCAGCACCCGCTGGTCTGCCTGGGCAATGGAGATGGCCAGGTTGATGGTGGTCGTCGTTTTGCCCTCGGCAGGGGAGCCGGAGGATACCACAATGGTTTTGCATCCCTTTTTCAGGATGGAGAGCATAATGTTGGTACGAATGCTCTTGTAAGCCTCCTCAATCCGGAACTTCTGCGCCGGATCCATGTTGGCATTGGAGATCAGGGTGCGGGCAAAGGGATTGTTCGCTTTTTTGGCCATCTTATTTCGCCTCTTTCTTTGTGTTTTTCTTGCCGGCAGCACTGCGCTTGCCGGTTGTAAAGGCGGGAATAGAGCCCAGTACCGGCACATCGTAGCGCTGGCTCAGCTCCTCGGCGCTCTTGATGCGCACATCTAACAGATCCCGCAGGATCACGTATGCGGCAGCTATCAGCAGTCCCGCTACGGCACCCAGCAGGCAGTTCTTTAAGTATCCCCGGCCCTCGGCGGTGTTGGGCTTAATGGCCTTGTCCTCCACGGTAGTCTGAACCAGGCCATTGTTGGTTTCCTCCATCTGCTCCGGCACGCTCTCCTCCATTTGGTGAGCGATGTTGTAGGACAGGGTGGGGTCTGTGGTGGTGACGAGCAGCTTAAACATGGCTGTGTTCTCCACCGTCTCAATGGTAAAAGATTGCTTAATATCCGCCGGAGACAGGTTGGTGTAGTATTTTTTGTTCATCTCGCCTGCCACTTTGCCGCAGAACTTGTTGGTCTTGAAGATCTCAATATAGGTATCGATCATCTTCATAGCGTAGTTCATTTTGCTGGTCTGGCTGGTGCGGGCCACCTCGCCGGTGCTGTCGCTGATTTCGTGAGCCGGATCCACCGCTGCAGCCAGGAACTCCACGCTGGAGGTGTAGGTCAAGGTGGTGAATTTGGCGGTATAAACCCCGGCCAAAAGCGCTCCGATGAGCATAAACAGGATCAGCAGCTTCCACTTGCGCAGCAGCAGCTTAACGACCTTTTGTACATTTTCGTCAATGTTCATAGACTTGTCTCCGTTACTCTGCAAAAACATAATTTATTTTTAACAGATATATATTACTGTATTATATCTGGTTTGTCAAGGTGTTCACTATTGACAAAAGCGGGCAAAAAGATGATAATATCCTTGCAAAAAAATCAAAAAACGGAGAACTGCGTATGAAAAAATCTCAAATCCGTATGCCCCTTTGGGGACCGTATTCCAAGAAGTATATGGGACTGTCCCGCATTGTGGACGATCGGGCGGCAGAAGGTGCTCGCTATGATTTTGTGGTGCACCCCACCCTGTGGAATTCCGCTACCCCGGTGCCCAATGTGACTGTGCCGTCCGGCTACCATTTGTGGAGTTGTGACGAGGACTTTCGCTTTTATTCCTATCGCTATGAGCTGATGTGGAAGGACCAAATTTATGCCGATGTGTCTTACACCCGGTTGGATGAGGAGTCCTACCTGATGCGCTGCCGCTTCGTTAACGATACGGACCTGTCGCAAAACTGTATTCTGAATATTTTCGGCGCACTGGAGTTCCCGGCGCCGGAGCACTGTGTCTTGCAGCTGCCTGGGGATGCCGCATTGGTGGATGCCAACGATTATACGCAGTACACCTATGCAAAGCCCCGCCCCTGGGATAATGAGAACCCGGACGGTATGCACAAGGGCGAGTTTGCCGACGGCAACTTTTACCACGCCCACGGTTTGGGCGACCGGTGCGAGAATTACCATGTGGATTTCCTGGGGCTGGAGCCTTTCGGATGCACTGCCGGGGACAAAGTGGTATACACACTGCCGTCTCTCCGACCGACGGGCGCTACCTTGCTGTTGCGCTATCGCACAGTGACCCCGGGTGCTGCTGCCTTTACCGTCAACGGTGTAGCGGCAGAACTGCCGGAGAGTGACAGCCTGATCTTTGCCGCGCTGCCCTATGACGGCGCAGACACCCTGACCCTGGAGAGCCGGGGCGGCGCCGGTGTGGAGCTGGATGTGCTGGTGCTGTGCCGGCCGGGCACGGAACAGGAAGTCAGCGCCCGCACGGTGCTGCGCGACACCAAGCCTCAAATTGAAGAAGAAAAGGTGCACGGCGCCACCCGCATTACTCTAACTTACAAGGACGCGGAAGGCTGCTATTCCATCTTGACGCACAATCCCAAGACCCGCCGACGGGAACTGGACAGTGGCAGCCTGGAGGACGCGCTGATTAACCGACTGTCTAACGGCGACCCCACTTATGACGACCTAAGGGAGACCTTTTCTCGCTCCTTCCGCCGCAAAAAAAGTGACGAGGGCTACTATTACAATGCGGTGATGCCCTCCATCTTTATTGACCCCCACGCAGAGCATATAGAGTATGCGGTGCTGTCCAAGGGCAAGGTGGAACCCCGCACCACCGAAGAATACGAGCAGCTGTATACCGCCGCCAAGGCGCTGGCCACTCCGGTACAGTTCAATCGGGAGGGACAGAAGTACAGTCTGTCTACCGAGATCTTGCGGGCAACACTCCTGACCAACTTGGTATATCCGGTGTACAAGCACGGCGAGAATGTAGTACATTACACCCCCGGCAAGCGCTGGGACAGCTTTTATACCTGGGACAGTGGCGTGATCGGCACCGGTGTGTTGGAGTTCAGCCCGGAGAAATGCCGCTACATTTTAGAGACTTATTTGTCCCAGCCGGAGAATACGGACTTTGCGTTTCTGCTCCACGGTTCCCTGGTGCCTACCCAGTTTGTGCAGTATTTGGAACTGCTGCACCGTACGGAGGACAAGGCGCCCCTGTTTGCTCTGTATCCGCAGATGAAGCGGTATTATGACTATATCAGCGGCAAGACCCCCGGCTCCACCTGCGGCAAGTTCGGCAACGGCCTGACCACCACTTACGACTACTGGTATTCTTGCAGCGGTATGGACGATTATCCCGCCCAGGTGGCCATGATCGCCCAGGATAAGAAACAATATATGTGCCCCTGCCTGTCTACTTCCCACACCATTCGGGCCGCCAAGATCATGAAGATGGTGGCTGCCGCCATGGGCAAGGAGGAGGACATTGCCGCTTATGACGCAGACATTCAGCGGATGAGCGACGCTCTGAACCGTTACAGCTGGGACGAAAAGAGCGGCTATTACGCCTACTCCGTCTATGACGATGACAAAAACTATCAAGGCATTTTCACCACCGACGCCGGGGAGAATTATGACAAGGGCATGGACGGTGTATATCCGCTGTTTGCCGGGGCTGCTCCGGAGGAGCGGCGGGAGCGCCTGCTGGCGCATATTAACAACCCGGACGAAATGTGGTCCGCTGCCGGCATCAGCGCGGTGGATATGACAGCCTCCTACTATTTTGACGACGGCTACTGGAACGGCAATGTGTGGATGAGCCACCAGTTCTTTATGTGGAAGACCATGTTTGACCTGGGCGAGACGGAATTTGCCTTTGAGATCGCCCGCCGGGCGCTGGATATGTGGAAGGAAGAGACGGACTTTTCTTACAATACATACGAGTGCTTTGGTATTCAGACCCGCCGCGGCGGTTGGTTCCACAATTTCGGCGGTCTGTCCGCGCCTATCAATGTGTGGGCGGACTGCTACTATCGCCCGGGCACCTTTACCTGCGGGCTGGATGTGTGGACGGACAGTCAGAAGCTTACGGACACCTCTGCGGAGGTCCACTTCCGTTACACCGGCGACAATGGGCAGTATGCCTTTGTGCTCACCCTGTCGGATGCGCACAGCTATCGGCTGACCTTGGATGGGCAAGAACTGGATTACGCTCTGCGCAGTGACGGCTGTATGGAGATTACCCTGCCGGGTACGGTGCGCAGCGGCGTGCTGAAGGCAGAGATGAAATAAAGGAGAACGCAATGGCAGCGAAGTTGTATGGCGCAGGCAATGCGCCGCTGAAAATTCAATTTATCACCGATCCGCATTACTACTCCCGCAAGGGGGGCACCGAGGGCAAGGCTTACGAAAAAGCCGAGGCCAAGAGCCAAAAGATCATTAAGGACAGCGACCTGGTGATCAAAGCCGGGTTTGATTTGCTGTGCGCGGACACTTCCACGGATATTGTGGTGCTGGCCGGCGATACCACCCGGGACGGAGAGCTGGCCTCTCACGCCGAGTTTATTGAAATGCTCCGGGACCTGAAAAAGCGAGGCAAGCGGGTGTATGTGATCACTGCTACCCACGATTATCGGGACGGCGGCGTGGCCGACGGCTATGACGGCGACAAAAAGATTCAGGTGCCGGCGGTGGAGGAGCGCCACGATCTGTGGCAGATGTACTATGAGTTTGGCCCCAATGAGGCCATTGCCACCCACCCGGACAGCATGAGCTATGTGGTGCAGCTGGCCCCCGGCTATCGGCTGTTTGCTCTGAATGACGATACCAACTATAAGCCGGAGGGGGAGAACGGCTCCGGGTACAGCGACGACTGTATGGCTTGGATCCTGGATCAGCTGGAGGACGCTCGCAAAAATGATCAGTTTGTGATCGCCATGACCCATCACCCCATGATCGCTCCCAGTCCTTTTTATGCCATTATCGGCAAGGGGGATATGCAGCGCAATCATGAGACCACCCGGGAGATTTTTGCCGACAACGGACTGCAATGTATGCTCACCGGTCACACCCATATTCACGACATCAGCGTGGTAGAGACCAAAAAGGGCAACACCTTTTATGACATTGCCTGCGGTGCTATGATCGGCTGCCCGCCCACCATGCGCAACATTACGCTGGACCCGGCCCACGCCAAAGTGGATGTGGAGACGGTGACCATTACCGATGTGCCGGGGCTGGACACCGGCGGCAAGCCTTTTGATCAGTATATGCGCACTTTCTTCTTCGGTATGATCTCCGAGCTGCTGGACGCTGCGGCCACGGATATTGACCATTTGGCAGAGATGACAGACGCTTTTTCCGTTCCCGGCGAAAAGGTCAAAAAACTGGGCTGGCTGATTAAGCCCATTGCCAAGTGGTTGAACAAGCTGACCTTTAAGAAAGCCTGGCGCCTGTGCAAGAAAGAAAGCGGCCTGTCCAAGAAAGATATTGCGGACATTGCAGATCATCGGGTAGTGGACTTTATCCTGGAGTTGGTGCAGAACCTGTATTGCGGCGACTCGCCTTACGGTCCGGATACGCGGGAGTACAAGATCTGCTGCGGGTTGCTGAATGTGATCGACGCGTTCCTGAACACCATTCACTTCTCCATCGGCAAGGTGCTGAAGGGCGCCACCTCCGTGCGCGGTCTGGTAGAGCCGCTGCTGTGGAATCCGGGTCCCTGCGACGCCAACGCCACGCTGCCCCTGTATCCTTTGTACGATGATGAGAACCCGGCGCCGAAAAAGGCAGAAAAGCCCGCCTTTGACGACCCGGTGCGCCCCAGCAAAAAAGGCCCGCTGGTGCTGGCGATCCTGGTGCTGCTGGTGATTCTGGTGCTGGCGATCCTCGTTGGCTTGATCGCCTTGGTGATATGGGCTGTGGTTGCCATTGTGCACGCTGCCACCACCGGCTGTATTGGCGCGCTGCCTTTCGTTTTTTAATTCTGTAAAATAAAGGTTGCAATCTTAGCCAAAAAATAGTATAATGAACCCGTTATTTTTGTACAGTCCATGAGAAAGGGGTAAAATAGTTATGGCAGATGACAAAAAGAAGAAAATTAGCCTTGGCGGTATCGACAACGCCGCTGAGGAAAAGGGCTCCTTTATGAAGACCCTTTGGCAGCTTGTAAAGTTCCTGGTGGTATCCGGCTTGGTAACGATCATCCAGCTGGTGCTTGCCAATGTGCTCCCGTTAATTTTTGACGGTGTGACCGCTACGCTGCCCGTTTTCCTGCAGGGTATCTTTGATCCCAATGTGATTTTTGACGCCTCCACCAAAGAGGGCATCGAGCAGGTAGGCAAGTATGTGATCGACGGCACCATTCAGAACGGTTCTGTTGTTGGCGGTGTGGTAACCTGGGGCTATCTGCTTCCGTTCTTCCTGTCCAACCTGATTGCAAACATCTATGGCTTCTATCAGAACAAAAAGACCACCTTTAAGTCTGATGCGCCTTGGTACAGCTTTGCGTTCTATATCGTTTTGATGATCGCGCTGATTCTGTTCTCCACCTGGTTCCAAGGCTGGTTGGTTGGCATTATCGCCAAGATCAACTGGGCTTGGATTCAGCCTTTGGCCAGAACCATTGCCGGCTTGGCTGCTGGTTTTGTGCAGATGGTGGTGCTCTTCCCCATGGAGAAGTTCGTTCTCCTCAAGGAGAAGAAAAAGGACGGCGAGGAAGCTGCCGCAGAGGCTGCTGCCGAGTAATCGCTGCTTTAGCAAAAATGAAAGACCGCTTTCCGTTTTTCGGAGAGCGGCTTTTTCTTGCCTAAAAGTAAGGAGTATGGTATAATCACAGCAGAACGCGGAAGCTGTAAGAAAAGCCCATTGGCAGTTGGGATGTGACTATATGGAAAAGAAGAAAAAACTGTGGCAGGTGTTGATCCCTGTTTTGGTGGCACTGGCTGTAATTGTTGCCTTTGCCATCAGCGGCACCATTACCCGCAGGGCAGATGAGAAGAAGCCTACGGCGCCCACCAAGGTGTCTGTGGTTAACCAAACGGAGGATCACACGGAGGAGACCCAGGGCAAGACCCGGGTGCGCTTGGTGGCAGTAGGGGACAATCTGATCCACAATACCCTAATCGCTGCCGGAGAGCAAAAGGACGGCAGCCGGAATTACGACGCCTTTTATCAGGATATTAAGCAGTACATTGAACCGGCGGATATTGCCGTTATCAATCAGGAGACGGTGCTGGGCGGCAGCAGCTTTGACTATTCCGGCTATCCCTGCTTTAATTCACCCTGGGAGATTGGCGACGCCGCCATTGCTGCCGGGTTTGATATTTTTACCTGCGCCACCAATCATACTATGGATATGGGCAGTGCCGGAGTGGCGAAAGAGCTGGAATACTTCGGCAAGCATAAAGAGGCGGTGCACCTTGGCACCAACGCCTCTCAGGCGGATTATGACAAGATTACTTATTATGAGAAGAACAATATTACCTTTGCTCTGCTGAATTACACCTACGGCACCAATGGCATTGACTTGCCCAAGGACAAGCCCTGGCTGGTGAATTTGATGGACAAGGACAAGATTCGGAAGGACATTACCGAGGCACGCAAGCATGCGGATGTGGTGATGGTCTTTCCTCACTGGGGCACGGAGAACAGCCACAAGGTGTCCGATTACCAAAAGGAATATACGAAGCTGTTTTCTGACCTGGGTGTAGACATTGTCATCGGCAGCCACCCGCATGTGCTCCAACCGGTGACGTGGGTGACCAACGAAAAGAGCGGCAAAAAAATGCTGGTCTACTACTCCCTGGGTAATTTTATCAGCCACCAGATCAATCTGCCCCAACTGTGCGGCGGTATGGCGGAGGTGACGATCGAAAAGGATAATGGAAAGATCACCATCTCCTCTGCTAAACTGGCGCCGGTGGTGTGCCATTACAGCCGGGGCGGTAACGGTTTTGTGTTTTCCGTTTATAAGCTCAGTGATTATACCGACGAGCTGGCCGCCACCCAGGCGCAGAAGGGTGCCACGGTGAAGTATTTTACCGATTTGTCGAAAAAAGTTATCCCTGCCGAATTTTTGGACATATAGCAAACAGTCTGTCTATCCTGTGCATATTGTACAAAAGGCGTGCACAATTCCTGCCGCCAATTACAAGATTTGCCAAAGTTGTCAAAAACCGTTGACAAACCGAGGACAATGAGATTATAATGACATTGTATTCAGAACGAGGGCGTTCCGTTGATAGCGGAGCGCCCTCATTTTTTATTGCTTTTGGCAGTAAGAAAATTCTGTGCTATCTATCATTTCTTAAGAGAGGAGTATTTGCTATGAGTAAATACACAAAGGAAGACATCATCAAAAGCGCACAGGAAAATAATGTAGAGTTTATCCGCTTGCAGTTTACGGATATGTTTGGCATTATGAAGAATGTGGCCATCACCCTGTCCCAGCTGGAGAAGGCGCTGGACAATGACTGTATGTTTGACGGTTCTTCTATCGACGGCTTTGTTCGCATTGATGAGTCCGATATGTATCTGCACCCGGATTATGACACCTGGACGATCTTCCCTTGGAGAAAGCACCAGAATGCGCAGACCGCTCGACTGATCTGCTCCGTATATAAATCCGATAATGAGACCCCTTTCCTGGGCGACCCCCGCAATGTGCTGCAAAAGGTGATGGACGAGGCTGCCGAGATGGGCTTTGGCTTTAATGTTGGCCCGGAGTGCGAGTTCTTCCTGTTTAAGCTGGACGAGAACGGCAACCCCACCCTGGAGACCGGCGACGAGGGCGGTTACTTTGATCTGAACCCCATTGACCACGGCGAGAACTGCCGTCGGGATATTTGCCTGGCTCTGGAGGATATGGGCTACACCATTGAGGCTTCCCATCACGAGGTGGCCGAGGGCCAGCACGAGATCGACTTCCAGTTTGGTGATGTAATGCTCAGTGCCGACCGTGTAATGACTTTTAAGCATGTGGTTAAGACTTACGCTGCCAAGCACGGTCTGCACGCCACCTTTATGCCCAAGCCTATTTACGGTATCAACGGCTCCGGTATGCACACCAACATGAGCCTGTATTATCTGAAGGACGGCAAGAACGCTTTTGATGACCCCAACGGCGAAATGGGCCTGTCCGAGACCGCTTATAACTTCATCGCAGGTATTATGGCCCATATTCGCGGCATTGCAGCGTTCTCCAACCCCACCGTGAACTCTTACAAGCGTTTGGTACCCGGCTATGAGGCACCGTCTTACCTGGTATGGTCCGCTTCCAACCGCTCCTGCCTGGTGCGTATTCCTGCCGCTCGCGGCAAGGGCACTCGCGTAGAACTGCGCTGCCCGGATCCCACCTGCAACCCCTATTTGGAGATGGCTTTGTGCCTGGCTGCCGGTCTGGACGGAATCAAGAAAAAGATGACCCCCGCTTCTCCCATTGACTACAATGTGTTCGGTCTGTCCGACGAGGAGCTGAAAGCCGCCGGCATTGATTGTCTGCCCGGCAGCCTGAAAGAGGCTATTGAAGCCGCTAAGGCAGATCCGTTTATTAAGGAAACCCTGGGTGACCATGTGTTCAATAACTATATTGAAGGCAAGGAGAATGAATGGGACGAGTACCGCACCAAGGTCTCTCAGTGGGAGATCGACAAGTACATGGTACTGTATTGATTTTGCCCTCTCTTACGGTCGGCACTGTCTTTTGACAGGGTCGGTCATTTGCCGGCGCCGGGCCATTGGCGCGGTGTCGGCATTCTTTAGCACAATGGAGTGCTCGAACTTCTGTTTTCGAGCGCTCTTTTTTTATTTCCATTTTTAAGCTTTTTTTGATGAAAAGGAGGATTTTATGGGGCTTGAAACAATCATGGAAACGGTGAACAGCGAGCTGTTCGGCGTGTGGTTTTTGATCGGCGCAGTGCTGGTTTTCTTTATGCAGTGCGGCTTTGCTATGGTAGAGACCGGCTTTACCAGAGCCAAGAACGCCGGCAATATTATTATGAAAAACCTGATGGACTTTTGTATCGGCACGGTGATGTTCATTCTGTTGGGCTACGGGCTGATGTGCGGTCAGGACTATATCGCCGGGGTGATCGGTCTGCCCAACCTGGGCATTTTCACCCACTATAATGATTTTAACTGGTCCAACTTTGTATTTAATCTGGTGTTCTGTGCCACGGCGGCCACCATTGTGTCCGGCGCTATGGCAGAGCGTACCAAGTTTTCTGCCTACTGCATTTACTCAGCAGTGATCTCCGCTGTGGTGTATCCCATCGAGGCGGGCTGGGTTTGGAATGTGGACGGCAACGGCTGGCTGCAAAAGCTGGGCTTCCACGACTACGCCGGATCCTGCGCCATTCACATGGTGGGTGGTATCGCGGCACTGATCGGCGCCATCTTTCTCGGTCCCCGGATCGGTAAGTACCATACGGACGAAAAAACCGGCAAAAAGACACCTAAAGCCATTCCCGGTCACTCCCTGACTCTTGGCGCGCTGGGCGTGTTTATCCTGTGGTTTGCCTGGTACGGCTTTAACGGCGCGGCGGCTACCGATGTTCCCACTTTGGCGTCTATCCTGGTGACCACCACCGTAGCGCCGGCTGTGGCCACTTGCACCACCATGCTCTTTACCTGGATCAAGGACGGCAAGCCGGATGTGTCCATGTCCCTGAACGGCTCTTTGGCCGGACTGGTGGCTGTGACTGCCTCCTGTGATGTAACGGACGCTTTGGGCTCCGGGATCATCGGCGCTGTGGCCGGTATTCTGGTGGTGCTGGTTGTGGAGCTGCTGGATAAGAAATTGCATATTGACGACCCGGTAGGCGCTGTGGCTGTACACATGGCCAACGGTATTTGGGGCACGCTGGCCGTAGGCCTGTTCGCCACGGACAAAGCACCGGGCTATGCAGTGTCCGGACTGACCCATACGGGTCTGTTCTATGGCGGCGGACTGCACCTGCTGGGCACCCAGTTAATCGGTTTTGCGGCTGTGGCCGGTTGGGCGGCAGTGACCCTGACCATCACTTTCTTTATTCTGAACAAGACCGTGGGCCTGCGGGTCAGCGCGGAAGAAGAGATCAAGGGGCTGGACGCCACCGAGCATAACCTGCCCTCTGCCTATGCGGACTTTATGCCCGTCGGCGGCTTTGCTGCCGTGCCGGTAACGGAAAGCGGCTTGCCGGCTGCACCGGTAGAAAAGGCTGTTCCGGTAGAGACTTATACCACCAAACCGGACGCGAAGCTCAGCGAAGTGGTGATGCTCTTTAACCCGGCCAAGCTGGAACGGGTGAAGGACGCCATGAATGCGGTGGGCGTTACCGGTATGACCGTGACCAATGTAATGGGCTGCGGTACCCAGAAGGGTCATGTGCGCAAGTACCGCGGTGTGGAGATCGAGGAGCTGAACTTGAACCCCAAGATGAAGCTGGAAATGGTGATCTCCGCCGTACCGGTGGAAACGGTGATCGCCGCTGCCAGAGAGGCGCTATATACCGGTAATATCGGTGACGGTAAGATTTTTGTTTATGATGTGGAGGACGCAGTAAAGGTGCGCACCGGCGCACGGGGCTATGACGCTCTCCAGGGCACGGACGACTGATCGTCCCTACCTATCGCGGCTTTGCCATTATACGGTGGCAAAGCCGTTTTTTTGTACAAAAGAACCAAAAGTGAGTGGTAATTCACAGAAAAGAGTGCAATTCTTTGTGAAATTCACTATAATTATGCTGATTTTGTGTTGTAGATTTTTATAGTGGGCGCATTGACGGGTAATCGACAGTGTTGTACAATAAAGTATAGGTTTTTTTGAAGAAATACAGATACAGGAGTGATGAATATGCTGCGAGAGGGTGAAGTGCGCATTCCCTCCGGCTGCGCCATTGCCGCCATTATTGACCGCAAGGGTGAGCCGATCAATGGGTCGGAGATTATCCAGTCCATTGCCTTGATGCACGACCGTTCCAACGGCTTGGGCGGCGGTTTTGCCGCCTATGGCATTTATCCCGATCACAAGACGGATATTGCCTTCCATGTGTTTTACCAGTCGGTACAGGCACGAGGCGCTTGCGAGGAGTTTTTGTTCAAGCATTTTAATGTGGATGTTTCCGAACGCATTCCCACCAAGAAGATCGCGTCCATAGAGAATGGACCGGATATTTGGCGGTATTTTGCCAAGCCCAATAAAGTGCGGATGAAAGAGGCCCGTCTGGACGAGGACGAATATACCGCCCAGTGCGTGATCCATGTGAACAACGAGATCGACGGCGCTTTTATTTTTTCCAGCGGCAAGAATATGGGCTGCTTTAAGGCTGTGGGCTATCCGGAAGATGTGGGCGAGTTCTACATGCTGGATCAGTATGATGCCTATTTGTGGACAGCACATGGTCGCTTCCCTACCAACACCCCCGGCTGGTGGGGCGGGGCACACCCCTTTAATCTGCTGGACTGGTCTGTGGTGCATAACGGCGAGATTTCGTCCTATGACGCCAACCGTCGGTATATTGAGCAGTTTGGCTATGTGTGTACCATGCAGACGGATACGGAAGTGATTACTTATCTGTTTGACCACCTGATCCGTCACCATCAGCTGCCCATTGATGTGGCAGCCGATGTACTTACGGCCCCGGAGTGGGACGAGATTGACCGTATGGACCCGGAGCGGAAAGAATATTTTACCAACCTGCGCTCGATCTATAATGGCGCCTTGGTGAACGGGCCGTTCTCTGTGATCCTTGGCTCCAACAAGGGGCTGCTGGCCATCAACGACCGGCTGAAATTGCGCTCCCTGACTGCGGCTACCAAGGGCAATCGGGCGTATTTCGCTTCAGAGGAGTCCGCCATTCGTGTGATCTGCCCCCACCCGGAAAAAGTGTGGTCCGTCAGCGGTGCGGAGCCGGTGTTTATTCCACTGGAACTGGCAAAGGAGGAAGACGATGATTAATTATATTCCCCGCCGGTTCACCATTGTGCGGGATCGGGAACTTTGTATTGATTGTGGCTGCTGTGTGCGTCAGTGCTCCAACGAGTGCCATAGCTTTGGACCGGACGGCAAAACCGTGGTGTCCCATTCTCAGGATTGCGTGGCCTGCCATCGGTGCGTGGATCTGTGCCCCACCGGCGCCCTTCGGATCGAAAAATATGTGTGCGACTATCGGGATAATGCCAACTGGACCCCACGCTATCAGCAAGAGATCTGCCGCCAGGCAAATACCGGCGGCGTGCTGCTGTCCGCTATGGGCAACCCGCAGCCGTATCCCATTTATTGGGACAAAATTTTGCTCAATGCCTCCCAGGTGACCAACCCCTCTATTGACCCTTTGCGGGAACCAATGGAAATCCGTACCATTCTGGGTCGTAAACCGGATCGGCTGCAAGTGGAGCGCAAGGGCAAGTCCGTGACCAAAATGCCGCCTCAGGTGATGTTGGAGACGCCCATTATGTTCTCTGCCATGAGCTTTGGCTCCATCAGCCTGAATGCCCAAAAATCTCTGGCCATGGCTGCCAAGAATATGGGCACGCTGTTTAATACCGGTGAGGGCGGTTTGCACCCGGACCTGGCGTCTTACGGCGACTGTGCTGTGGTACAGGTGGCCTCCGGCCGCTTCGGTGTGCATAAGGATTATTTGAATAACTCCAAGTTTGTAGAAATTAAGATCGGCCAGGGGGCCAAGCCGGGGATCGGCGGCCATCTGCCCGGTGAAAAGGTGAATGTGGAGGTCAGCAATGCGCGTATGATCCCGGTGGGATCGGACGCCATTTCACCTGCTCCGCATCATGATATTTATTCCATTGAAGACCTGCGCCAGCTGATCTGGTCGCTGAAGCAGGCCACGGATAACAAAAAGCCCATTTCCGTTAAGATTGCAGCGGTACATAACATTGCGGCCATCGCCTCCGGCGTGGCGCGTGCCGGTGCGGATATTGTGGTAATCGACGGCTTTCGCGGCGGCACCGGCGCAGCGCCCACCCGCATACGCGACAATGTGGGTATTCCCATTGAGTTGGCGCTGGCAGCTGCGGACCAGCGGCTGCGGGACGAGGGCATTCGTTCCACCGTGTCTTTGGTGGCTGCCGGTTCTTTCCGCTGTTCCTCTGATGTGATCAAGGCGATTGCTCTGGGTGCGGATGCGGTGTATATCGCCTCTGCGCCGCTGATCGCCATGGGCTGCCATATGTGCCAAACCTGCAACACCGGTAAGTGCAACTGGGGCATTGCCACCCAGCGTCCGGATCTGACCCGGCGACTGAATCCGGAGATCGCTCATCAGCGAGTGGAAAACCTGCTCTCCGCCTGGAACCATGAGATGAAAGAGATCATGGGCGGCATGGGCATCAACTCCGTAGACTCCCTGCGCGGCAACAGACTGATGCTCCGTGGTATTGGTCTGACTGATCGGGAACTGCAAATTTTAGGCATTAAGCACGCCGGGGAATAAGGAGGACAGTGAGATGAAAAAAGTATTTGCACGAGAGGAACTTTGCGTCAACTGCCACCTGTGTGAAGTCTATTGCAAAACGGCACATTCAGCCTCCGGCGATGTGCTGACAGCCAATAAATATGAGAATCCGGCGCCTATCAGCCGGGTAAAGGTGTACGGCGACCGTGTAGCCTCCGTGGCGGTGAACTGCCGTCATTGCGATGACCCGGCCTGTGTGAAGGCATGCATTACCGGCGCTATGCACAAAGACAAAAAGACCGGCATTGTGTCTGTAGACCCGGACAAGTGTATCGGCTGTATGACCTGCCTGGCGGTGTGCCCCATCGGGTGTATTCAGCCCGGCAATATTGCCTACAAGTGCGACCTGTGCGGCGGGGAAGAACCGGCGTGCGTCAAGGGTTGCCCCAATCGAGCCTTGGTTTGGGTAGAAGCGGGAGGTGCTGCCAAGTGAAGTATGTGATCATCGGTGCCTCTGCCGCCGGACTGGCTGCGGCGGAGCAAATTCGCAAGACGGACCCGGCAGGCGCAGTTACCCTGCTGACTCGGGAGACGGATCTGCCGTACTCTCGTCCGTCTATCAGTTATTACTTAAAAGGCCTGGTGCGGCGGGGTCAAATGCGCTTGCGCACTCCGGCTTACTATAAAGAGCAAAAAATAGAGATCGTCACCGACGTAGAGGTGACCGCCATTGATCGGGCAAAAAAGACCGTTAAGTGCGGGCGCAAGGCGTATAGCTATGATAAGCTGTGCCTGTGCACCGGCTCCGTGCCCTTTGTGCCGCCGATGCAGAATGTAAGCGGCAAGCGCAATGTGTGCGGCTTTTTGACCGCGGCAGATGCCCAGGCTGTGCACGATCTGGCAAGTGCAAACACCCGCGCCGTGGTGATCGGTGCCGGGCTGATCGGTATGAAGGCCGCCGAAGGCTTGAGCAAAATTTGCAAAAGCGTAGATGTGGTGGAGCTGTCCGATCGGGTATTGCCCTCTATTTTAGATGAAAAGAGTGCCAAGCTGGTGCGCCGCCATTTAGAGCACCACGGTCTGCGCTTTCACCTGGGTCAAACGGTGACCCGGGCCAAGTGCAGCGGTAAGACGGTGCAGCGGGTGGTGCTGCAAAACGGCAAGGAACTGCCCTGCGATCTGCTGGTGGTGGCAGTGGGCGTGCGCCCGGCCACGGCACTGGCAGAGGCAGCGGGCCTGACAGTGGAGCGGGGGATTATCACCGATCCGGCCACCATGCAGACCTCGGACCCGGATATTTACGCCGCCGGGGATTGCGCCGTGTCTGTGGACATGTTGGACGGCAGTAAGAAAATCTTGGCTCTGTGGCCCAATGCAGTGGCGCAAGGGCGTGCAGCAGGCAGCCAAATGGCCGGCGGCGATCTGATTGTCGGCGGTACCTATGCGGTGAACGCTATTGATTTTTACGGTCTGCGCATTTGCACCTGCGGGCTGATCAACGCTAAGGGAGACGGCTATACGGACCGTGTGGCTGCCGCAGACGATAGCTACAAGCGCCTGGTGTTCCGGGACGGCAAGCTGGTGGGCTATGTGCTCATCAACGCCAGCGAGAACGCCGGAATCTATACATCTTTGATCTCTGGCGGTGTGCCGTTGGAGGGTTTGCAAGGGGATTTGATGGATAGTCCCAATCTGTTCTGGTTCCCCAAGGAGACCCGGATCACCAAGTTGAGAGGAGGCGTGCAGCTGTGAGTATTGAGGCAGGACTGTGCAAGTATGCAGAGCTGAACGACAAAATTAAGCAGGAGCTGCGCACCAAGAAAAAGGTAACGATCACGGCGGTGAACGGTCAGCGCTATATCGGCTGCGCCCTGGACGCAGGCAAAACCATTCAGGTGCACGGCACTCCGGGCAATGATATGGCTTGCTACTTAAATGGTGGCAAGGTGGAGGTGTTTGGCAACTGCCAGGACGCAGTGGGCAACACGATGAACGGCGGCGAGATCGTCATTCACGGCCACGCCGGCGACGCTATGGGCTATGGTATGCGGGACGGCCAGATCTTTGTAGAGACCAATGTGGCCTGCCGCGGCGGGATCCACATGAAGGAGTTTGAACAGATGAAGCCGGTGCTGGTGATCGGTCGCAATGCCGGTTCCTTCTTGGGCGAGTATATGGCCGGGGGCACCATTGTGCTGCTGGGGCTGGGTATGAAGCGAGGCGAAAAGCTGTTTGGCACCCACTGCGCCTCCGGTATGCACGGGGGCAAGATCTTTGTGCGGGGCAGCTTTCCCAAGGAGAACATCAGCCCGAACATTAAAGTGACGGCCTTAACGGACGCGGACCGGCAGGAATTGGAAGGGTATTTGAAGAAATACTGCAAGTATTTTGGCGTTTCCATGGACGAGATCATGAAAAAATCGTTCAAAAAGTTGGCTCCCGCCACCTCCAGACCTTACGCAAACCTTTACACGCCCAACTAATGGTATTATAATAGAGAAAAGAGCGACAACCACACGGGATAGGAGAGAGCGATGTTCGATAGTTTGCACGAGGAATGCGGTGTTTTCGGCGTATTTGAAAATCAGACCACTACGGTGGCCCAGACGGCGTATCTGGCTCTGTTTGCCTTGCAGCACAGAGGGCAGGAGAGTTGCGGCATTGCCGTGAATGACGACGGCGTGTTTCGCCACCATCGGGGCGACGGACTGGTGCCGGATGTGTTTAGCAAGGAGCAGCTGGCTGCCCTGGGTACAGGTAATATGGCCATCGGTCATGTGCGCTACTCCACCACCGGCGGCAAAAACGCCAACAATATTCAGCCCCTGGTCATTCGCCATATTAAGGGTAATTTGGCGGTGGCACATAACGGCAATTTGGTAAACGCCCCGGAGCTGCGCCGCCAGTTTGAGCTGAAGGGCGCCATTTTTCACGGCACATCGGACACCGAGTCCATTGCCTATTCTATTGTAGAGGAGCGCCTGCACAGTAAGAGCACGGAAGAGGCCATCGAAAAAATCATGCCCCGGCTGCAAGGGGCATTCTCTTGCGTGGTGATGACTGCCACCAAACTCATTGCGTTTCGTGACCCCAACGGCTTTCGGCCTCTTTGCCTGGGTAAGACTGCGGACGATGCTTATGTGGTGGCGTCGGAGAGTTGTGCGCTGGATTCCATCGGCGCCCACTTTGTGCGGAATATTGCTCCCGGCGAGATCGTTGTGATCAGCAAGGATGGCGTGCGCTCTATTACCACCCATTGCGGCGGACTACGCCACATTTGTGTGTTTGAGTACATCTATTTTGCTCGGCCGGACAGTGTGATTGAGGGCGTGTCTGTGCAGCACGCCAGAATGCGGGCCGGTGCGTACCTGGCGAAGGAACACCCGGTAGACGCGGATATTGTCATCGGCGTGCCGGACAGCGGCCTGGACGCCGCCTTGGGCTATGCCCAGGAGAGCGGCATTCCTTACGGTATTGGATTTATCAAGAACCGCTACATCGGCCGCAGCTTTATTCAGCCTACCCAAGGTCAGCGTGAGGACGCGGTGAAGATCAAGCTGAATGTACTGCGAGAGAATATCAAGGGCAAGCGGGTGGTGATGATCGATGACTCTATTGTTCGCGGCACCACCAGCGCTCGGATTGTCAGCCTGCTGCGAGAGGCCGGCGCCACCGAGGTGCATATGCGGGTTTCTGCCCCTCCGTTTCGGCATCCTTGCTTCTTTGGAACGGACATTGATAGCGAAGAAAACCTGATTGCATGCAAATTTCACGAAATTTCTGAAATTTCTTGCCAATTAGGGGTTGACAGCTTGGGGTATCTTAGTGTAAAATCTACTCACGAACTTGCGAAGGAGTCCGGATTCGATTTTTGCGACGGTTGCTTCACCGGCCATTATCCCATCCCCACCCCGAAGCAACAGTCCAAGGATAAGTTTGAGGAAAAGCTGAATCAGTTCTCCTCTTACTACCAGGTCTTGGATTAAAAGTGAATAAGCGGACGCACCTAGCGCCCGCTGTATATGGAGAGTTGTCCGAGCTGGCCGAAGGAGCACGATTGGAAATCGTGTAACATCTAAACGGGTGTTCGAGGGTTCGAATCCCTTGCTCTCCGCCAAAAAAGCCCCGAATGGCGCGTGATTACGCGAGATTCAGGGTTTTCTTTTTTTTGCTTTTTTCTGTTTTGCGCTTGTGGCAATTTGTACGCCAATGTTGGTATTTGACGGCATTTTTGTCTTACTTTTGTCTTACTCGTTCAGGAAGAAACAAAGGCGTTTAACTGTTCAGCGGTACGCTGTACTCTGCTCTGTCGAATGTGGGTGTACACATCCATAGTCAGTTCCACCTTGGAGTGCCCCAGCAGCTGGGCAGCGTCCTTGGCCGACAGATCGGTGTCAAAGCAGATGGTGGCAAAGGCGTGTCGTAATTGGTGCGGGGTGAGTGTCACACCGGCACCCGCTGGGCCAGGGATCCGGTAACCGGCAAGTCCATGACCGTACCGGCGGATATGACCTATGCCCAGTGGTATGAGAAGTATGTGGAGAAAAACGGCGGCGTTATTCGTGGCGCAAACGGCGTAGATAAACCGGCGGTGGAGGAACAGGCGGAAGCTGTATATCTTGGCCAAATCAATCCGCAGTCTGAGCAGGAACGCAATGCCTATGTGGATCGGTTTATTACACAGTACGAGCGTGCCGACGAGGAGCACATGCTGGTCATTGACCGCACCGGCAAAGTGTATTCCGTTACCAGTCACCAGCCGGATTATATCGACTTAACCGGCGTTGACATTTCCATGAAAGGCAGTTACAATATACATAATCACCCGGCGGATCAAACGCAGTTTTCATTTAGTGATGACGCAGATATTCCAAATATGATCGCCGACGGCACCAGCGCGATGGAAGCCTTTGACCATAAATACCGCTACCGTCTGGAGAAAATGGACGGTGTGACGCTGGAAGCGTGGGAAGAGGCAAAAGAACAGGCGAAAGACGAGGTGCCCCGCGCCATGCGGGTTCAAGGAATGGATTTTTCAGATTATGAAGAAAATGCAAAGCACATACTGATCGAGGAGACCTGCCGTATTTTAGGGAAAGGAGCGTACATTCGATGGAAAAGATAGGCATTGATCCGGAAGAAGAAAAGGAGTTGCTTGATCTTGGCAAATATTATTCAAAGCGTAGTGAGGCAATCCTTAAGGAATGGAGAAGAACGCTTCCGAAAAGAGGCCGATATAGGCACTGTAATACGCCGGAAATGAAAGCTTTAGAGGCCGAGGTTAAACACCGGTACGGTGAAATACTGGAAAAGTACAAGGCGCTCCGTGCAGAGCAAGAACAAGATCGATAATCCACAGAAAGCAGAGTTGCAGATTGCGACCCTGCTCTTTTTATACCCATTTTCAGGCTATGCCTGTGGGAATATATCATTTAACGAACCGGCAGCGTACGGTTTGGGAAAGGAGTCAGCAATGACAAAACAGTATGCCGAGATGGAAAACAGCAGAGAACAGAGCCGGGTGTGCGCACGCCTGCCGCTGAATATGCATATAAATTATTGTTGCTCCGTTGTATGATGACGGATTTTGACTGAAAATTGCATTTTTTCAAAAAAGTTAGTGGTCGGTATTGACAAATATTACTCTTTTGTAGCATAATAGCTGAGAGGAGGAGTGAAAATGGTAGTAGAAGAGACGCGGGATTTAGCCGAAACTGCGGATTGTGTAGTGATCGAAGCCATTTTAGTGGATGACGGATTGCGTTACAGACAGCTTTCTGTCGGCATCAAAGACGAAAACGGCGACATTATTCGTATCGTCCCTATTTCAACCGTTCTGATCTAGCAAAGAAGCCGAGCAGTGTGAAACTGCTCGGCTTTCTTTTTGAATGATTCAAATGACGTTTGAGTGCTTTTCAATCATGGGTTGATTGCGCTTTATGAAGAGTAAAAGGGACACTTGTCGGATAAACCGGCACGCATTTGTATGTCCGTTTTGCACTTGCCGGTATCCACGATCGGCTGGGGCTTGCCAACCGGCGCGGTGTTGTGTATAATGAAAACACATGATGCGGCGCGGAGGTATGTTTATGAGAAAATCGTCGGTCGGGTCAGCTGTTTTGGGCCTTTTGGCGGTAACGGTGGCGTCAATTGGAGCGACGGGGGTACTGATGCTTTTGCCGTTTCCCAATGATCGGGCGTTATTTGGTTGCGCCGGCGCCATAACGGCGGTGCTGTATTTTGGCTACGGTCGATGGATCGGCAGCAGGCAGAGCACCAAGGTGGCAGGGCTTGTGATGATCCTGGCTGCCGCAGTGCAAGTGTTGTGGTTGGTGATTCTTTACGGTGCAGTGCCGGAATGGCTCTTAGGGATCGCCGGGTGCGCGCTGCCTTTTGTGGCGCTCGTAGACGGCGGTACGGGCAGCAGAGAACTGCTGGCACTGGTGCCGGCCTTTGGCAATGTGCTGTTTTTACTGCTGGGGGACTTGAGCCGACGGCGGTTGAAAAAGTGCAAATAGAAGTCATGATGAAAAAAGGAACCGCGGTGCCAAACTGCGGTTCCTTTTGTACATTGCGTTATTTGACGGTGAAGAAGCTGCCGTACTCCGGGTCGCTGCGCATGGAGTAGGTGTCGGTAGGACTGACGATAATATGATCCAGCAGCTGCACATGAATGGAACGCAGAATGGAAAGCAGACGAATGGTGAATTCCAGATCCTGCGCAGAGGGCTGGGCCTTGCCGCCGGGATGGTTGTGTGCCAGCATAACAGCGTTGGCGTTGTCTCGCAGAATATGTTCCATCAAAGTGCGCTGATCCACAGAGGCCAGGTTGACGCTGCCGCTGCCTACGGCGTGGGTTTGCAGGATTTTGGCACTGCCGTCCAGGGTGACCAAGTACACCTGCTCGGCGGTTTTGTCCCGTAACAGATTGGAAAAGTAGGCGCAGGACTGGGTGGCATCTGTCAGGTGCTTGACCGGTTTGTTTTGATTTTGATGGATCCGCCGGTTCAGATCCCGTACCAGCAGAATCTGTACGGCGGTCTGTTCGCCGACGCCCGGCACTTGTTGCAGATCTGCTGCGCCGGCGGCAAACACCTGCTCCAGCGAGCCGAAGCGGTTAATGAGCGCATAGGCAATGGGCTTTACATCTCTGCGGGGAATGCTGATGGACAGCAGCAATTCCAGCAACTGGTGGTCCGGCATAGCGTCGCCGCCGCCTTGCAGATAAGCGGCACGCATACGGGCTCGGTGCCCATCCCTGCTGATTTCCATTTGTATCCCTCCCGACCCTGAAAGCAAAAAAGGCGTGCCTCCGCATTTGCGGAGAACACGCTTTTGTGTTCTACTGTATATTATACAAGAAAATGTGGCATTTGTAAAGACGATTACTTACCCGGTGCGTCGCTGCGGCCCACCAGGTAATCCAGGGTCACATCATAATGGTCTGCCAGTTTGCAAAGGGCTGCCAGGGGAATCTCCCGTTGCCCATTTTCATACATGGAATAGGTGCTTTGACCCACATTCAGCAAGGCTGCCATTTGCCGCTGCGTTTCGTCCCGGTCCTCTCGTAAATCCTTTAGCCGCACGGCAAATTACCTCCTTGGTACTCAGTATAGCTATTGTACAAAATCCGCTGAACGACATTTGTAATTATCACGAATTGTGATACTTTTTGTGACGAACTTTGACCTTTTGTGACAATATTGTCATTTTATAAAAATAGATTGACTTTCCGGGTCTATCCGTGTATTATTGTATCAATGAACTGTACTACGCACCATAATACGGTAAGAACGGCGAATCTTTCGCATATCTTTAGATTTTGTTGCGTTTCTTTTTAGGTTTTTATGATTGAATAATGGCAAGACAATTTGTTAAGTAGGTGAACAAAATGAAAAATGTACTTGAATTACTGGAACGCACTGCGGCACGTTTGCCAAGGCAGACCGCCTTTGCAGATCAGCAGTGCAGCTATGATTACCAAACGGTGGTGAACATCGCCGGATCCGTGGGCAGTGCGCTGGCCGCGAATGGAGAGCGGAATTGCCCGGTGGCGGTGCTGATGGAGCGGGGCGCACCCTGTTTGGTGACCCTGATGGGGGTGCTGTACAGCGGCAACTTCTATGTGGTGCTGGATCCGGAAATGCCCGCCGAGCGAGTGAATAAGATTTTGCACACTTTGCAGCCTACGGCACTGATCTGTGACGAGGCTCACAAGGACGACCCGGCGGGACTGGATTATGACGGCAAGGTGTATAGCGCAGAAGCGCTGGCGGACGGTCAGGCACAGCCGGAGCTTTTGCAAACGGTGCGCCGCCGTATGATCGACACGGATCCGGCCTATGCCATTTTTACCTCCGGCTCCACCGGCAACCCCAAGGGCGTGGTGGTGAACCATCGCAGCGTGCTGGCGTATTCCGCTTGGGCGGCCGATACCTTTGGCATCAGCGAAAAGACGATTTTCGGCAACCAAACGCCCTTTTATTTCAGTATGTCGGTGACGGATATTTACGCTACGATTCGTACCGGAGCGCAGTTACATGTGATCCCCAAGTCGTATTTCTCCTTCCCGGCTCTGCTAATTCGCTACCTGAATGAGCGGCAGGTAAACACCATTTATTGGGTGCCCTCCGCCCTGTCCATTGTGGCCAACTTAAAGGTGCTGGACTTTATGATGGCGGAGCATATTGAAAAGGTGCTGTTTGCCGGTGAGGTCATGCCTGCCAAGCAGCTGAATTACTGGCGCAGCAAGTATCCGAACGCCCTGTTTGCCAACCTGTTTGGCCCGACGGAAACCACGGATATTTGCACCTACTACATTGTGGATCGGGAAATCAAAGACACGGAGAGCGTGCCCATCGGCATTGCCTGTGACAATTGCGACAGCTTTGTGGTTACCGAGGATGGGCGGCTGGCCGGAATCGGCGAGGAGGGCGAACTGTACGCCAGAGGTTCGTTCCTGGCTATGGGCTACTATAACGACCCGGACAAAACGGCGGCTGCCTTTGTGCAAAATCCGCTGCAAAGTCACTATCCGGAGCGGGTGTATAAAACCGGCGATCTGGTGCGGTGGAATGAACGGGGCGAGCTGATTTATCTCTCCCGCCGGGACTTCCAAATTAAGCACATGGGCTACCGGATCGAACTGGGCGAGATTGAGGCGGCTGCCACGGCCCAGCCGGGAGTGGATGTGTCCGTGTGTTTGTACGACCAGGCGGCGGATCAGCTGATTTTGATCTATGTAGGTGCTAAGGCGGAGCAGGAGACCGTGCGGCAGGCATTGCAGGCAGCGCTGCCCGCATATATGCTGCCGGCCAAGGTCATTCAGGCCAAGAACATTCCCTACAACCAAAACGGCAAGACCGACCGAAAGGCGTTGGCTGCCGCATACTTTAACAAAGCTGACTAAAGTCCATTCAAAAATTTATATATAATGAAAAAGGAGAACTAAAAATGGAAGAATTGCTTGAAATCTTGGAAGAAATGAAACCCGGTGTAGACTTTAAGTCTGAGAAGCACTTGATTGATGACAAGGTGTTTGACTCTCTGGCGATTATGGCGCTGGTGGCAAAACTCAGCGATGAGTTTGATGTGGAAATCACGCCGCTGATGATCGTGCCGGAGAACTTTCAGTCTGCCCAGGCGATGTGGCAGATGATTGAAAAATTGCAGGACGAATAAAAATTATACATAAGGTAAGCAAGTTATGTCATTTACATCTGTTACTTACTTTCTCTTTGTAGGGATCAGCCTGCTGATTTATACCATTGTGCCCAAGCGGGCCAAATGGTGCGTGTTGCTGGGTGCCAGCGCCGTTTACTATGTGATGGCAGCGGGGCTGCGCACGCTGTGGCTGGTGGCGGCCATCCTGATCGTATACGGCGGCGGGCTGCTGCTGGGCCACCTGAATGATCAGGGCAAAGCCCGGCGCAAGGCAGCTGCCGACAAAGAGGAAAAGAAACAAATTCGCAAAAAATATGACGCCAAGAAGCGCGCGGTGGTCACCGTGGCGGTACTGGGCGTCTTTGGGTTGTTAATAGCCTTAAAATATGTAAATTTCCTGGGAGAGAGCGCCTATGGCATTGCCGGGCTGTTTGGTAGCCAGAGCGCCTATCAGCCGGTGCAAATTCTGCTGCCCCTGGGTATTTCTTACTATACCCTGTGTGCGGTCAGCTATGTGGTGGATGTGTACAGAGGTAAGTACAAGCCGGAGCGTAACTTCTTCAAACTGGCGCTGTTTCTCAGCTTTTTCCCCCAAATGACGGAGGGCCCTATCGGCAAGTATGAGATCATGATGCCCCGGTTGGTGGAGGGCCACAGCTTTGACTTTGAGCGAGACGCCCAAGCGGTGATGCGCATCTTTTGGGGTATGTTTAAGAAGATGGTCATTGCCGACCGAGCCAACCTGTTTGTTACCGGTGTGTTTGACAACGGCGACCAGGCCGGGTCTATGGTGCTGCTGGGCACCCTGCTTTATACTGTGCAGATCTACTGCGAATTCTCCGGCTGTATGGATATTGTGTGCGCCACCGGCCAGCTGTTTGGAGTGGAGATGCAAGAGAACTTCCGTCGCCCTATTTTCTCCAAAACCATCAACGAATTTTGGCAGCGGTGGCACATTACCCTGGGCGCGTGGATCAAGGAGTATGTGTTCTTCTCCGTGTCCCTGTCCAAGGGGCTGATGAATTTAAGTAAGCATACCAGAAAGAAATTCAACGATTATTTTGCCAACCTGGTGCCCATGACCTTTGCGCTGTTTTGTGTGTGGTTCTTTAACGGCATTTGGCACGGCGCCAGTTGGAAGTATGTACTCTACGGGCTGTATTATTACATCTTAATGATGATCGGTATGTACCTGCGCCCGGTGTCGGACAAGCTGCTGCACGCACTGCATATTGCGCCGGAGAGTAAGGGCTTTGCCCTGTTCCAGATGGTGCGTACTTTTCTGATCGTCAATGTGGGCATGATGCTGTTCCGCTGCCACACGATTTCCCAGTGGGGCCAGAGCCTGGCGCGTATCTTTACGGATTTTGACGGCGCTTGCTTAACCAACGGCACGGCGCTGTCCCTGGGTAACGACTGGCAGGATTTCCTGATTATGGGTATCGGCGTGCTGGTCGTAGGCATTGTAGAGGTGCTGCAAGAGAAGGGCCACACCATTCGCTCAGAGCTGGCTCGCCGTCCGGTAGTGCTGCGGTATGCGGTGTTCTTGGCGCTGATTTTAGGTGTGATCGTCTTTGGCGCTTACGGTACCGGCTATGAAACGGTAGCGCCTATTTACGGTCAATTCTAAGGAGGGGTGCATGATGACTGCAAAGACCAAGTTGATATTGAAAAATTGCACCCGCCTGGTGTCCTTTATTTTGATTTTGCTGCTTTTGCTCTACGGTATTTCTTTTCTATTGGAGCCGAAGAACAATGATGACGCAGCCGGGTTCGTGAACCCCAACGCCAGCGGCTATCTGTCGCTGGAGAAGGACACGCTGGATGTGTTTATTGTAGGCAACAGTGATGCTTACAGCGGCTTTTCGCCTATGGAAATGTGGAAAAACTACGGCTTTACCTCTTATATCAGCGGTACCGGTAAGCAGCTGATCGGCGAGTCTGTTCGCGCGGTGGAGGAGTGCCTGAAAACCCAAAAGCCCAAGGTGGTGATCCTGGAAACGGATCAGCTGTATACCAACTCCAACTCTGCTCAAGTGATTGCCCGGGATGCGCGTAAGCAGATACTCAACCAGTTCAGCGTGCTGGAGTACCACGATCGTTGGAAGCAGTTTGACCCCAAGACGGCGGTTAAGCGCAAGTCCTACTCTGCCCGCTTTGCCTCCAAGGGGCAGTTTGTGTCCGGTGCCAAGGTGCCGTATCGGGGCAAGGAATATATCAAGAAGACCAAAAAGCGAGACCAGATCAATCCGCTGTTTGTGCGCAAGCTGGACGAGCTGAATGCGCTGTGCAAAAAGAACGGCGCCCAACTGATTTTGGTGCAGGTGCCGTCCCAAACCACCTGGACCTATGCCCGCCACAATGCGGTGAATGATTATGCCAAGAAAAACGGCATTCCGTTCCTGGATTTGGATCTGAAACGCAAGGAGATCGGCTTTAGCTGGAAAACGGACAGCCGGGACGCCGGCAACCACCTGAACTGCTACGGTGCCAAAAAAGTATCGCTCTATGTGGGGCAGTACATTAAGAACCATGTGCAGTTGGAGGATAAGCGCCAAAATGCAGCATACGCCGGGTGGAACGATGACTACACCACCTACATCAAGCACCTGAAAGAGGGCGGCGATGTGGAAAAGCGCAAAGGCCCTACGGCGGGGCAAAACAAAAACCCTGTGCCCAACGACCGGCATAAGAAAGAACAGCCCCATACCGGCGACCCTTACGATCCCTCCGTTCAAGCTGTTTCTAAGCAATAAAGATACAAAGACTGTCGCAGTGCTTATGCTGCGGCAGTTTTTTGTTTTGCCGACCAAATTTTACCGGTTCTTTAGATTTCCTTTGCGTTGCTTTTAAGAATGTGTGGTTAAATGTGTACAACGGGTTTTCCGTTGGGGATTTTTGTGGTACAATGGAGCAAGCACTTTGTATCACTTGAGGGAGATGAGAGCAATGTTTACGGTATTGGTGTGCGATGATGACGCGGCGATCTTAGAGTCTCTGCGTATTTATCTTAGCCAGGAGGGCTATCGGGTGCTGTGTGCCCGGGACGGGCTGGAGGCGCTGGAGCAAGTACAGGGGGAGGAGATCCACTGTATGGTGCTGGACATTATGATGCCTCGGCTGGACGGACTGAAAACCACATTAAAGCTGCGGGAGAAGTACAACTTCCCCATTATTCTGCTGTCGGCCAAAAGCGAGGACACCGACAAGATCATGGGTCTCAACATCGGCGGTCTGGGCTTTGGCGCCGATGATTATGTGACCAAGCCCTTCAACCCGCTGGAGTTGACCGCTCGGGTCAAGAGCCAAATTCGCCGCTATGTGCGTCTTGGCAGCCTGGAGGTGCGGGAGAGCCAGCTGGTCACCGGCGGCCTGGTGCTGGATACGGATACCAAGGAAGTGACGGTAGACGGCGACCCGGTACGGCTGACTGCCCGGGAGTATAAGATATTGGAATATCTGATGCACAATATAGGCCGTGTCCTCTCCAGCGCCCAAATCTATGAAGCGGTGTGGAACGAACCGGCCTACGGCACGGAAAAGACCGTGACGGTGCACATTCGCAACATTCGTGAAAAGATTGAGATTAACCCCAAGGAGCCCAAATACTTAAAGGTGGTGTATGGACTTGGATACAAAGTGGAAAAATGTTAGAGAAAGCAGACGGTTTAAGGCGCTGTGCGTGGTGCTCTCTATGGTGCTGGCCTTTAGTTCGGTGGCGCTGTTGGGCGCCGTGATGCGGATCAGCGGCCTGTATAATAACGATGCATTTACCGATCCGACCGTAGCGAAAGAGGGAAGCCTGGTACAGACCACGATCTTCCAATCGGAGCTGGATGTGATTGTCAATGAGATCGCACTCCTGGCGGGGCAAAAGCAGCTGCAACAAAAGGCGGCTGCTCTGAAGAAAGCCAAGACGGACAGCGTGGCGGCCGCACTGGAGCAATATAAGAAGGACCAGGCCACGGCCATTCGCAAAACGCTGGTGTTCTATGCCGGGCTGAAAAATCAGAATATTTCAAATATCGGCAAGGATATACCCAACTATAAAGTGCCCGCCAAGACCATCAAGAAAGTGGTGGCAGAGGATCGGGACGCACCGGGGCTGATTCGGGATCTGCAACAGATTGTCAACGGCACCCGGGCAGGGGAGGATTATCTGCCCTATTTGCAGCTGGCAAATTGGCTGCGCAGTTCCGACGGCGTGGAGTATTACAATGATAGCGACATGCAGGATGATCCGGAAGATTTGACCGACTATTACACGGTCGATTTTACGGTGGATGGCAAAACGGTATCGGCGGATATGTATGATGATGACCTGACCTTGGGCGAGACGATCAAATCGGCTGAGACCCACATCAAAAAGCTCTATAACAAAGCGGTGGTGAAACCATATCAAACGGCTGCCGACGAGCAGCAGAAGATGCGCCAAAATTTGCAAGAGCTGCAATGTCTGCAATTCTATGCCAAGGATAATATCACCGGTCAGGTGGTCAGCCAGTTGCCCGAGGGTCAAACGCCGGCTATGCTGAAAGACGCGCCGGTGTACTATTCCAAAACCAAAGCGGGGGAGAACCTGCGGGGCACGGATTACGGTGCCGGCAATGCCAGATCGGACGCTGTACAGTACCTAATGGACGGGGATATGAGCATTTATGTGGGCATTGACCCCACTGTGGCCGGCGGCAACGATATGCTTCCGGATTTTGTGGAATTGAATGCCTTGTGCACCCGTATGCAAAATGTAAATACCGTGGCGATGACCGTGGCGGCTGTTTGCCTGGCGGTGCTGGCCCTTGCTTTTTTGGTGTTGGCGTGCCTGGGCTGCGGGCGCCGTGCCGGTACGGATGGTGTGCGCCTGCTGTGGATGGATTATATTCCCTTGGAATTGCACACGGCGATCATCGCCGCAGCAATTGTTGGGCTGGGTGTGGTGCTGTTCGGTAATTTGTTTAATGACCTGTCCAATTATTATGGCTATCAGCTCAGCACCCTGTATTACGGCGGACTGTTCTTAGCGGCCTGCGGCGCTTTGGGCGCGGTGGCCTGGGGACTGTATGCAGAGTTGACCCTGTCTTTTGTGCGTCTTTGCAAGTCTAAGAAACACTTGTATAAGGGCACGCTGCTGTATTATATTTGCTTGGGAATTTGGCGTCTGTTGTGCAAACTGCACCGGTTCAACCGCCGTATGATCCGGGGACTGGCCTACACCCCGCGGCACTTTAAGCGCAATATGGTCTTTTGTGCCGTAGGCTATCTGCTGATCAATATTATATTGGTGCTGCTGTTTGCATCGTTTCTGAATGGAGAGGCGCCGGTGGTCGGTGTGATCAGCGGCTTGGTGGGCCTGGGCTTTAACGGCTTTTGCGTGGGCTACGCGCTGCGCTTTTTGTTCCAGCTGGATCGGGTGATTGAGGCCGCAGCCAATCGCACGGATGTGGAGGCGGCACATCTCCACCCGGCACTGGCCGCCATGGCCGGCAGCCTGCGTTATACCAATCAGGAACTGCACAACGCCGTGGATCAGGCAGTGCGGGACGAACGGCTGAAAACGGAGCTGATCACCAATGTGTCCCACGACTTAAAGACCCCGATTACTTCCATTATCACTTATACGGATCTGCTGTCTAAGTGTCCCCAGTCGGACGAAAAGGCCAAGGAATATATGGCTGTGCTGACGGAAAAAAGCACCAAGCTGGCACGGCTTGTGGAGGATTTGATTGAGGCGTCCAAGCTGTCCTCCGGCAACATCACCCTGCACCCTATGGTACTGGATCTGGGCGAACTGACCGCCCAGGCTATCGGGGAGTACCAAAAGGAATTTGAGGAGAACCGGCTGCAACTGGTGCTGGATCCGGATTTGCCTCGGGTACAGGCGTTTGCCGACGGTTCCAAAACCTACCGGGTGCTGGAAAATCTGCTGCAAAATGCCAAGAAGTATTCTGCCGCAGACTCCCGGGTGTATGTGCGGGTGTATAAGCAAGGGGATTTCGGCGTGTTTGAAATTAAAAATATTTCTGCCGAGCCGCTGAATATTTCGCCTCAGGAGCTGACCCAGCGGTTTGTGCGGGGCGACGCTTCCCGCACCAAGGAGGGCAACGGTCTGGGCCTAAGCATTGCCCAGGAGCTGTGCAGCGCCCAGCAAGGGAAGTTAGAGCTGCTCATTGACGGCGATTTGTTTAAGGCTCGGGTGTATTTGCCGCAGCCGAAGAACGCCCTGCCGCAGGACACAGCGGAATAACGCCATAGATAACAAAAGACAGTTACCCGCTTTTGGGTAACTGCCTTTCTTTTTTCGCTTGTATTTACTTTTCGCTTTGACCTTTCGGCTTCATGGCGTTGTAAGAGGTGCGCACCGCGTCATCGCTGATGTTGCAGCCCAGTTCGTACAGGGGTACCTTGGCAAATATGGTCTCCAGCATATCAAACAGTCGCTCCATGGCGTTAGGCCCCAGCTTGCGCACCGTTTGGGAGAAAATGTTGAACACGGCCTTTTTGGTGTCTGCCGGGTGGATAAAATTCTCCTCCGCCCGCTCGAGAAAGCAAATGCCCGCCAGGGGAACCATGCCTGGGGTGGAGTAATCATATTTTCCGCTCCAGGGGGTGCCGCAGGCATACACCCGGTCGCCTACCAGGCGAATGGCCGGTTTGTCGTCATTGAGCATATATGCCCGGTTGCCAAAGTGCTTGAGCCACAGGGCGGTGTGGGTGGATTTGCCGGTGCCGCTGTCTGCGGAAAAAGCGTAGGCCGCGCCGTCCACTACCACGCAGCTGGAGTGGAGCAAAATGCCTCGGAACTTCAGCAGCTGGGTGTAAAAATCCGAGCCGGTGAGCATATAGTACCAGTCGTCCCGGTTCATCTCCGGGTGCTCGGCCATAGCGTCCGTTACCCGCTGTTCCGTCACATCAATGGTCATGTCCGCCGTCTGCCCCTCTTGGTCCTTGCACAGGTAGGGACGGGCTTGCTTTTCTGTTCTGCCGGTGGGGTGCTTGATCTCCACCACCAGCCCGGCAATATCGTAAAACGGCATAGTTGCACCTCAATTCTACCCATTAGTATATAAGAAAAAGCACCTACCGTCAAGGCAAAATCTACCTGCATTTTTTGCCGCCCCTGCTCTTGACAAACAGTCAAAATCGGTGTATGCTATGTCGTAGAACAAATGTTCGATAGCGGGAAAGGAGCCGTAGGGAATGGAGCGCACCGTTTTGCATGTGGATTGCAACAAGTTTTATGCCTCGGTGGAGTGCCTGCACCGCCCGGAGCTGCGAGACAAGCCGGTGGCGGTGGGCGGCAGCACAGAGAGCCGCCACGGAATTATCCTGACGAAAAACGAAATTGCCTCCCGCTACGGCTTGGTGGCGGGGGAGCCACTGTGGCAGGCACGGCAAAAGTGCCCGCAGTTGGTGGTGGTGCCGCCGAACTTTCCGCTGTATATGCGCTTTTCCAAGATGGCACGGCGGATCTATGAGGATTACAGCGACTATATTGAGCCTTTCGGGCTGGACGAGAACTGGCTGGATGTGACCGGCGATGACCGCACCGGAGAACAGATCGCCCAGGAAATTCGCCGTCGGGTAAAGGCGGAACTGGGCATTACCGTCAGCGTGGGGGTCAGCTTTAACAAGATCTTTGCCAAATTGGGTTCAGATTATAAAAAGCCGGACGCGGTGACGGTTATCAGCCGGGAAAACTACCGCCGGGTGGTGTGGCCCCTGCCGTGCAGTGACCTTTTGTGCGTCGGCCCGGCCACCACCCGCAAGCTGAACGCTTACGGCGTTTATACCATCGGCGAGTTGGCGGCGGCTCGGTCGGATTTTTTGCAAGGTCTGCTGGGCAAGAACGGGCTGATGCTCCGTGCCTTTGCCCGGGGGGAGGACACTTCGCCGGTGCAGCATATGGACGCCAAGGCGGCGGTCAAGAGTGTGGGCAATTCCACCACCACGCCCCGGGATCTGGTGGATGATACGGATGTAAAGGTGGTCTTTACCGTGCTGGCAGAGAGTGTGGCCCGCCGTATGCGGGAGCAGGGACTGCAAGGGCGCACGGTGTGCATCTCCTTGCGGGATAAGAATTTGCAAACCTTTACCCGTCGACACAAGCTGGCCGCCCCCACCGATGTGAGCACGGAGATTTTGCAGGCGGCCATGGCGCTGTTTTGTGCCAATTATCGCTGGGGCGCACCCTTGCGCAGCATTGGATTGTCGGTGACGGACTTTGAGCTGGAACCCTGTGTGCAGTTTGATTTGGCCCATACCCAGGAGCAGCGGGAGCGGGCAGCCAGGCTGGAGCGCACGGTGGATGATTTGAAGCGCCGTTTTGGCAACTACTGTATTCAGCGGGCCAGTTTGCTGGGGGATACCGGGCTGTCTCGCTTTAATCCCCACGATGACCATACCATACACCCCGTTGGATTTTTAACCGGAAAGGAACAGGCAGGATGAAAAACTATGTGCGCGTGCTGGCGCTGTATAATGAGGAGGGCGATATTCGCCCGGTAAAGATGGAGTGGGAGGAGCGATGGCTGGATGTGGACCGTGTACTGGATATTCGCCCGGCGGCGTCCCTGCGCTCCGGGGGCGCCGGACTGCGCTACACCTGCAGCATTGCCGGTGTGCCCACTTATTTGTTTTTAGAGGAGACAAAATGGTTTTTTGAACTTGCAAAATAGGACCGGATGGCGTATAATGTGCCTATGAAGAAGATTAAAGAATTATTGATCAAGTACAAAGAAATCATTATGTATCTCATCTTCGGCGTGGCCACCACAGGTGTGAACTGGGTGGTGTACAGTCTGCTGATGAAGGCAGTGCTGGTGCATGCCCCCGGCAGCGACGATGTGAAGATGACGGTCAGCAATGTGATTGCCTGGATTGCTGCGGTGATCTTTGCCTTTATCACCAACAAGCTGTGGGTGTTTGAGAGCAAAAGCTGGGTGCCCAAGGTGGCGGCGCGGGAGTTTGTGTCCTTTGTGGCCTCTCGACTGGCGACCGGCGTGATCGAGTGGTTCGGCCCATTGCTGCTGTTTAAGATCGGGCTGGATCAGGATCTGTTTGGGGTCAAGGGCTTTGTAGCTAAGATCGTTTGCTCCGTGCTGGTGGTGATCCTCAACTATGTGTTCTCCAAGCTCTTGGTATTCACCAAAAAGAAAAAGGGTGCGGACGCACCGGCAAATCCAAACGAAAAATAGGCAATGCGTATAAGAAAAGAGTGCTGCGGCGCTCTTTTTTTGTTGGCTTTAGAATTGCAAGGCGCAGTCGTTTGTGGTAAAATAATGAACGGAAATTTTAGATTGCGAGGTATTTTCGTATGGCAAGAACATATCAGGAGATGACAAAAGACGAATTGCTCCGGGAGCAGGAGAGTCTGCTGGCTCGGTACAAGGAATTTCAGGCCAAGGGACTGCAACTGGATATGAGCAGAGGTAAGCCCTGCAAAGAGCAGTTGGATCTGTCCGTGGGTATGAATGATGTGAAGGACTATGTGTCCGGCGGCGTGGATGTGCGCAACTACGGCATTGTGGACGGTATTGTCAGCTGTAAGCAATTGTTTGCCGATCTGCTGGAGGTGCCGGTCGAGAATGTGATCATCGGCCCCAACGAGAGTCTGACTTTGATGTTTGATTTTATCTGCCAGTGCTACACCCACGGCATCGGCGGTAAACCCTGGAGCCAGGAAAAGGAAGTGAAGATCCTGTGCCCAGTGCCCGGCTATGATCGCCATTTTACCGTGTGCCAGTATTTTGGACTGCAAATGGTGAATGTGCCGATGAACGCCGATGGTCCGGATATGGACACCATTGAAGAACTGGTGAAGGATCCCAGCGTGAAGGGGATGTTCTGTGTGCCCAAGTACTCCAACCCCACCGGCATCACTTTTTCCGATGCAGTGGTGCGCCGCATTGCGGCGCTTCGTCCGGCAGCAGAGGACTTCCGCATTGTGTGGGATAATGCCTATTGCGTGCATGACCTGGACGAGGACGGCGATAAGCTGCTGAATATTTTTGATGTGCTGCCGGAATACGGCAATGAGGATTTGGTCATTGAGGTGGCCTCTACCTCTAAGATCACTTTCCCCGGCGCAGGCGTGTCCTGCCTGGTGGCCAGCAAGAAAAATTTGGATCTGATCCGTCAGCGCCTGACGGTGCAGACCATCAGCTATGACAAGATGAACCAGCACCGCCATGTGGAATTCTTCAAGAATGCGGACGGTGTGCGTGCCCACATGAAGAAACATGCGGCAATTTTGAAGCCTAAGTTTGATATTGTGCTGGATCGCCTGAACAAGGAGCTGAACGGCCTGGGGATCGCTGACTGGTTCTCCCCTAAGGGCGGCTACTTTATCAGCCTGGATGTGCTGCCCGGAACCGCCAAGCGAGTAGGCGAGCTGTGTAAGGCCGGCGGCGTGACTCTCACCAGCGTGGGCGCCACTTATCCCTATGGCATTGACCCACAGGACAGCAACATTCGCATTGCACCTTCTTTCCCGCCCAATGAGGAGATGGCCTTGGCAGCGGAGCTGCTGTGCATTTGTACCCGCCTGGCTGCCATTGAAAAGCTGGTGGGCTGATGCAGGCCGGAGCTTCGACCGCTTGCTTTTATCCTTTGGAGACGGAGCGGGCTTTGCAGCAGGTGACGGAACTGGGCTTTCCTTTTGCGGAGGTGTTCTTTAACGCTCGGCAGGAGCTGCGCCCGGCCTTTGTGCGCCAATTGGCGGCTATTGCGAGGGACGGCGGCACCCGGGTGGTGTCCGTGCACCCCTTTTCCAGCTTTATGGAAAGCAGCTGCATTTTTGGCGATTACCAGCGCCGATTTGAAGATACCATTGATATTTATAAAGAAACCTGCCATGCGGCAGCGCTGCTGGGCGCCCAATTTGTGGTGATCCACGGAGCGGTTGCCCAGCCCAAGATTCCCATTCCGGAGGAGCGGTATTTTGCGCGCTTTTTGCAGCTGGTGGAGATCGGCCGCGCCGAGGGCGTGACCGTGTGCCAGGAGAATGTGAGCCGCTTTAAGAGCCAGCATATTGCCTTTTGCGACCGGATGCGCCGCGCGCTGGGGGACGATTTTCATATGGTGCTGGATGTTAAACAGGCGGTGCGCGCCGGGGAGGATCCCTTTGCGTTTCTGGATACCTTCCAAAAGGAGATCGTCCATGTGCACATCAGCGACCATTCCCCGGAGAAGGACTGCCAGCCCCCGGGGCAGGGTAACTTTGACTTTCAGCGGCTGTACCGCACTTTGGGCGATCGGGTGCATTATATGATTGAGATCTACTCCCGCGGCTACCGGGTGGCGGCGGAGCTGCAGCGGGCCAAGGCTTACCTGGATACAATCAAGTAGGAGGTGGGTGCTGTGGCTAAAACCAGCAACAAGACCATGGGCATTTTTTGCATTTTGTTGTCCGGGCTGTGCTTTACGGGTATGAATACCTTTGTGCGCCTGTCCGGCGATCTGCCCACCATGCAAAAGGTCTTTTTTCGCAATTTTGTGGCGATGATCTTTGCCTTTGTGATGATGGTGCGCAAGAAAGACAGCTTTCACCCCAAACCGGGGAACATCAAGTACCTGCTTATTCGTTCCGTTGGGGGCGTGGCCGGTATGGTGGGTAACTTCTATGCCATTGATCGACTGGACCTTAGCGACGCGTCTATGCTCAATAAAATGAGTCCCTTTTTTGCCCTGGTGTTCTCTGCGATCTTCATTAAAGAAAAAGTGCGGCCCAAGCAGGCGATTGCTATTGTGGTGGCATTCTTAGGGGCACTTTGCATTATTAAACCCACTTTTGCCAATGCAAATTTATTTGCCAGTGTTTGCGGCTTCTTAGGCGGTATGGCTGCCGGCGGGGCGTACACCTGCGTGCGGTACTTAGGGCTGCGAGGCGAGAACGGACGGTTGATCGTCTTTTTCTTCTCCGCTTTTTCCAGTGCGACGATGTTGCCGTTTTTGCTGTTTAACTATCATTATATGACCTGGCAGCAATGGGTGACTTTGCTGCTGGCGGGCGCTTGCGCCGCCGGTGGGCAATTCTCCATTACCGCCGCCTATACCCATGCTCCCAGCCGAGAGATCAGCGTATATGACTACGCCCAGGTGATTTTTGCGGCCGTTGTGGGCTATTTGGTGTTTGGCGATGTGCCGGATGTGCTGTCCTTTGTGGGCTACGCGGTAATCTGCGGTATGGCGCTGTGGATGTTCTTTTATAATCGTAAGGCAGACGGCACCGCCCCTGCCAAAAAGGTGTAAAGGCAAAAAACTTGCTTTTTTTCACCAATTATGGTATAGTACGGATTGTACAGAATTTTATGGCAAGAGCCGTATCTTTCAACAGGGGGGATAACTATGAAGTGTCCGTTTTGCGGTTATGCAGAGAGCAAAGTGATCGACTCACGTCCTACCGATGAGAACGAGCGCATTCGCCGTCGTCGGGAGTGTATGCAGTGCGGCAAGCGCTTTACCACTTATGAGATCATTGAGGATGTGCCCATTATTGTGGTGAAGAAGGACAAAAGCCGTGAGGTCTTTGACCGCAACAAGATTCTGAAGGGTATGCTCCGTGCCTGCGAAAAGCGGCCGGTGACCGTAGAGGCACTGGAGACTGCGATTTCTGAGATCGAGACCACTCTGCAAAGCGCCTTGGATCGTGAGGTCACCAGCGTGCGCATCGGCGAGCTGATTATGGAAAAACTGCGGGGAATCGACGAGGTGGCTTATGTGCGTTTTGCTTCTGTTTATAAGGAGTTTGACAGCGCCAGTGCCTTTGTGGACGAAATTTCCAAATTGCAATAAACCTGTTTCGCGCCCGGCATTTGTCGGGTGCTTTTTCTCTTTTTTATCTCGGGTATTGATAGCCTACTAAATATATGGTATTATAGGTTAAAGAAAGGATGTGACGGTATGAAAATCTCTACCAAAGGACGCTACGCACTGCGTATGATGTTAGATTTGGCCGAGCACAGGGAACAGGGCTTTGTGTCGCTGAAGGAGATCGCCGCCCGTCAGGATATATCCAAGAAGTATTTGGAGCAGATCGTGGCGGTGCTTAACCGCCCGGATTTCTTAAAGACCAACCGGGGCTACCAGGGGGGCTATCGTCTGGCCAAGACCCCGGACCAGTATACGGTTGGCGATATTCTTCGTTTGACAGAGGGCGGCTTGGCGCCGGTAGCCTGTCTGGAGGAGGAGCCGAACACCTGCCCCCGCGCTGCTTCCTGCGCTACGCTGCCGGTGTGGGCCGGGCTGTATAAAGCCATCAATACCTACCTGGACAGCATTACCCTGCAAGACCTGTTGGAGCAGGAACACAAAAATGACGATTACTCCTATGTGATCTAAACGCAGACCGCCTTGTTGATACAGGGCGGTATTTTTTTGTTCAAAGAGGGTTGACAAATACCCATAGGGGGTATATAGTAAAAATACCCCATGGGGGTATAGAAAGGAAGTGCTGTTGTGGCAGATAAAGACGAAATGCAGCCGGTTTGTGCTTGCTGTGCTAAGAAGAAAGTGCGCCAGCCGGAGGAGTACCGGCGGCTGATCCATCGACTGAACCGCATTGAGGGCCAAATTCGCGGGATCAAGGGTATGATTGAGAAGGACGCCTACTGCACGGATATTTTGGCCCAGTCCGCAGCGGCCGGTGCGGCACTGAATGCCTTTAACCGAGAACTGCTGTCCACGCATATTCGCACCTGTGTTGCGGAGGATATTAAGGCCGGCAAGGATGAAACGCTGGACGATTTGTTGGCTACATTGCAAAAATTGATGAGATAGCGGCGCATATTGGCGCCGGGAGGTGAGAGTTTGGAACAATACAATGTGACGGGGATGAGCTGCGCTGCGTGCAGTGCCCGGGTGGAAAAAGCGGTGCGCGCCGTGCCCGGAGTGGAAACTTGCTCCGTCAGTCTGCTTACCAATTCAATGGGTGTTACCGGTACGGCCGCCCCGGAACAGATCATCGCCGCTGTGGAAAAGGCCGGTTACGGCGCCGGCTTAAAACAAAAGGGTGGCGCTGCTCCGCAGCCGGTGGCAGACCCGTTGAAAGATACAGAGACGCCCAAGTTGTTGCGGCGGCTGATCAGTTCCGTGGTGTTTTTGCTGATTTTAATGTACTTCTCCATGGGACATACGATGTGGAACTGGCCGCTACCGTCGGCTTTAGAGGACAACCACATTGCCATGGGGCTGCTCCAAATGCTGCTGACCATTATTATTATGATTATCAACGGCCGCTTTTTTGTCAGCGGCTTTAAGAGCCTGTGGCACCGGGCACCCAATATGGACACCCTGGTGGCGTTGGGCGCGGCTGCGGCTTTTGGTTACAGCACTTACGCGCTGTTTGCCATGACCGGCGCCCAGGTGGCGGGCGATGCAGACGGCGTGATGCACTATATGCACGAATTTTACTTTGAGTCCGCCGCGATGATTTTAACGCTGATTACCGTGGGCAAAACCCTGGAGGCCCGCTCCAAAGGCAAGACCACAGACGCGCTGAAGCGCTTGATGCAGCTGACTCCTAAGACGGCGGTGCTGCTGGAGAACGGAAAAGAGCGTACAGTACCTATTGAGCAGGTGATGTGCGGTATGGAGTTTGCCGTGCGTCCGGGGGAGCATGTGCCGGTGGACGGCGTAATTCTGGAGGGCAGCAGTGCGCTGGACGAAAGCGCCCTGACCGGTGAGAGCGTGCCGGTGGACAAGACCGTGGGAGACCCGGTGTCTGCCGCCACGGTGAACACCTCCGGCTACTTACGGTGCCGTGCCACCCGGGTAGGGGAGGACACCACCCTGTCCCAAATCATTCAAATGGTCAGTGACGCTGCCGCCACCAAGGCACCCATTGCCAAGATCGCCGATCGGGTGTCCGGCGTGTTTGTGCCGGTGGTGATGGCCATCGCCCTGGTGACCACCGTGGTGTGGCTGCTTACCGGTCAGAGCTTTGGTTATGCGTTGGCCCGGGGGATCTCCGTGCTGGTGATCAGCTGTCCCTGTGCATTGGGACTGGCCACGCCGGTAGCCATTATGGTGGGCAACGGGCTGGGTGCCAAAAACGGCATTCTCTTTAAGACCGCTGTGTCTTTGGAGGAGACCGGCAAGGCGCAGATCGTGGTGCTGGACAAAACCGGTACCATTACCGAGGGCGCGCCTAAGGTGACGGACTTGGTACCAGCCCTTGGGGTGGAAGAAAGCCGCCTGGCAGCGCTGGCCTGCGCGTTGGAACAAAAGAGTGAGCACCCGTTGGCAAAAGCGGTGACCGCATACGGCGCGGAAAGGCAAATCACGCCGGAGCAGGTGACGGACTTTCAGGCGCTGCCGGGCAATGGATTGCAGGCGACGCTGAACGGCAAACTGCTGCTGGGCGGCAGTCTCAGCTATATGCGTAGTTTGGTGTCGGTGCCGAAAAATATGGAACAGCAAGCGGCAGCGCTGGCGGAGCAGGGCAAAACGCCCTTGTTCTTTGCCTATGATGGCGCACTGCTGGGTATGATCGCCGTGGCTGATGTGATCAAGCCGGACAGCCCGGAAGCTATCGCGGCGTTGCAAAAGATGGGTATTCGCGTGGTAATGCTCACCGGCGACAATCCCCGTACCGCTGCGGCTATCGGTCGGCAGACGGGGGTAGACCGGGTGATTGCCGGGGTGCTGCCCCAAGGCAAGGAGCAGGTGGTGCGCGACCTGATGAGGCAAGGCAAGGTCATCATGGTGGGCGACGGTATTAACGACGCGCCGGCCCTGACCCGGGCGGATATCGGTATGGCCATCGGCGCCGGTACGGATGTGGCTATCGATGCGGCGGATGTGGTGCTGATGCACAGCCGCCTGCGTGATGTAACCGCTGCCATTCGCCTAAGCCGTGCCACACTGACCAATATTCACGAGAACCTGTTTTGGGCATTCTTCTATAATGTGATCGGTATTCCTTTGGCAGCAGGGGTGTGGATCCCTGTTTTTGGCTGGACCTTGAACCCTATGTTCGGTGCAGCGGCCATGAGCCTGTCCAGCTTTTGCGTGGTGACCAATGCCCTGCGGCTGAATTTGTTTAAGCTGTATTCCCCCAAGCGGGATAAAAAAATCAAACACCCGGTGGTGCTGGCAGCACTGCCTATGGAAAAGGAGAATTCTGCAATGACAAAAGTAATGAAAGTGGAGGGTATGATGTGCCCCCATTGTGAGATGACGGTAAAGAAAGCGTTAGAGGCTCTGTCCCAGGTGGACAGCGCCGTTGCCAGCCATACGGACGGCACGGCCACAGTAACCCTGAACAGCGATGTGGACGATGCGGTGCTGAAAAAGGCCATTGAGGATCAAGGCTATACTGTGAAGGACTAAAACGAAAAATGAAAGGCTCTCCGGCTTGTATGCACGTGCCGGGGAGCCTTTTTCTGCGTTCTTCCACCGGGGGTGGAGTCATTTCCACGCACCGTGCCTTGTCAAATGGGCGCTCTGCTGCCTATACTGGAGTTGCCCCCCGGGCAGAAAGGATGATGGTATGAAACGGATTTTAGCTCTCTTACTTTGTGTGGTATCGGTATTGGCACTGTGCGCTTGCAGCAAGGCGAATACTGCCCAACCGGCAGGCGCTCGGTTTGACAAGCCACTGCAGCAGCAGACGGAGAACCAACTCCAGCCCCAAAGCAATATTTACCTGACGGCGGATACATTCTACTATGCCACGGAGGATACCGATGAGCGGAACACCTTTGGCACGCCCCAAAAGCTGATGGCCTATGACCTGCTGACCGGCAAGACCCGCACGGTGCTGGACGGGGTGAGCGATATTGCGCAGCTGTGCCGCATAGGCAACACCCTGTATTTTACCTGCTATACTTATACTGACACGGACAGAACCCAGTGGGGCTTTTGTCTGTATGCTTACGATATAGACAAGGATTGGGTAGCATGCATTTACGCCACGCCCAATACCAGTGACGGGGTGGCGTTGGCCCCTTGCGGGTACACGCTGTTCTACCTGTGCAACACGCGGGACCAGGATGGTATGAGCGCAGACGAAAGCGGCAAAGGCGAGCTGCACGCCTGCACAGCCGCAGAGGACAAGGTGCTGCAATCCGGTTTGGAGACGGATCGTGCCTACTTCTATGATTGGTCGGACAGCGCGGCGTACCTGCTGACCAACAACGGCGGTACGGATTCGTGCTATCATCTGGACTACAAGGGCAAAATGACTCCCACCAACCACCGACCCAAAACAGAGCCGCGGGAGGAAAATGCCGAACCCTCGAAAAAACCGGTGATTGTGGCGGATTATCAAAATTATTCCATAGAGATCACCTGTACGGTACCCAAAGAGCCGGGAGACAGCGACTGTGGCTATCGTTATATTGCCCGGTATGTGCTCAAAGAAAAAGCCACCGGCAAGTCTTACGCCCTGTGCAGCGGCAGCTACTGGTATTATTACATCTAAAACGACGGTTGTCCCCTTTTGTCGCTTTTGTGCAAAATTGACAAATAATGCTTGCGCTGCGATGATAAAACTGGTAATATAGAAAGGTAAAGGGGGATTTCTATGTCCAGTCAAGTGCGTACATATACGGCTAAGGAACGGAATATGTACCTGGTGGGTATGATGGGGCAGAATATGATCTACAACATCATCGGCACCGGGCTGTATTTCTACTTCCAGTCGGTGATCTTTATTCCGGCAATGGCCATCAGTATCTTTATGGCCGTGGCGCGGGTGTGGGACGCCATTAACGACCCAATGATGGGCACCTTTGTGGACCGCACCAACACCAAGTGGGGCAAGTGCCGACCGTATTTGCTGTTTTCACCGGCCGTTATTATGGTGATCACCATACTGACCTTCTGTAACGGTATGTACAGCTCTGCCAACACCCCGGGCAAGAATGCCCTGATCGTGGGCTGGGCTGCCGTGTCTTATATCCTGTGGGGTATGTGCTACACGGTAGGGGATATTCCCTTGTGGGGCGTGACCTCCCGTATGACTGAGGTGGAGAAGGACCGGGCGTCCATTCTTTCCTTTGCCCGTATTGCAGCGGGCCTGGGCGGCGGCGTGGTGCTGCTGACCATCAATCCGCTGTCTCAGGCGCTGGGGAAAAAGTTGGAGTCCGCTGCCGGTTCTGCACTGAAGGGCCAGCAAATGGGCTTTATCATCGTGGCAGTGATCTTAACGGTAATCGGCTGTGGTATGTTCCAGATGACCGGTGTTTTTGTGCGGGAGCGTGTGCCCTCTGCGAAGCAAAAGTTCGGGTTTAAGGAGAACTTTAAGATCATGTGGGGCAACAAGCCCTTCCGCAACCAGCTGATTAGCGGTGTGCTGCGCTCGCCCATTCAGATTTTGCTGTCTGTTGCCATGACCCTGATGTCTTATTACTACGGCAACTACTTTGGCGATTACATGCTGTATATGATTATCTTCGGCGGCGCTATTTTTGGCGGTCAGTTTATCGCCATGGCGCTGGTGCCCAAGCTGGCGGAGAAACACGATAAAACGCGTATGCTCATCGGCTCTACCATTATGGGCGCCATTCCCTTTGCACTGATCTACCCGGTGTACCTGCTGGCGCCCCGGGATCTGGATCAGCCGCTGTGGGTGGCAATCCTGTTTGTGGTCTTTGCCCTGGCAGGCGGCGGCATAGGCGCTTTGAATGTGCTCCAGTCCGTGATGATCGCCGACGCGGTGGACTATGAGGAATATCACAAGGGCTATCGGCCGGACGGTGTGTTCTTCTCCGGCCAGTCTTTTATTACCAAGCTGTCCGCCGGGATCAGCTCCATTATTCAGGGCGTCGGCTACTCCATCGTGGGCTTTAGCGGCGACAATGTAAGCGCCTGCAACGAGGCTCTGCGTGCCGGTGCGTCCTTTAAGGATCAGTTCCCCCAGTATGCGGGGATGATGTTCTTCCTGTGTTCTATCCCGCCGGCTATCGGTCTGTTTTTGTCCATCATTCCGCTGCGTCACTACGGTATGACGGACGAGGAGCACCGCACCATTTTGGAAGCGCTGGTGCAGCGCCGTAATGCCCAGGCAGAAGAAATCGCAGATAACTGATGAAACTAATAAAGCCTGAGGGCTGCGCGGCTCTCGGGCTTTTGCTATATTCGGAGGCATTATGACCATTCGACCCTATCGCCCGGAGGACTGGGACCGGCTGCGCCAAATTTGCCGGGAGACGGCGGCCAAGCCGTTTCAAAGAACCGGGCGCACCTTAGAGGCGGTAACGCTGATTTATAACGACTATTTTACTGCTTACGAGCCGGATCATATTTTTGTGCTGGCGGACGAAAGCGATCGGGCAGTGGGGTACATTCTCTGTGCTGCGGACTACCGAGGTCTTGTGCATCGCTACCGCACCACTTATCTGCGCCGGGTGTTGCGCACAGCGCCGGATCAGGCGGCGGGCTTGCTGGGCTATTTGTGGTGCCTGGGCAAAATCAAGAACCGGCCGGTGCACTTCCACCTGGATATATTGCCGCCCTATCAGCGGCAGGGGTGGGGTACACGGCTAATGGACACCCTGTGCTGTCATTTGCGGGAGCGGGGTGTAGACTACCTTTCCTGCTGCGGGGTCAGCCGGGATTCCGCCGGGTACAAAATGTATCGCAAATACGGCTTTACAGAGAGTTACGATTACGGCCATAACACCGTATCTTTGTCCCTGCGGCTGTAAGTGAAATTGCAAAGTGGACAAATGTCTTGCATTTTGGCGTACACTGTCGTTTTTGCACAAATAATACTTGCTATTTGCCACACATACTGGTAAAATAGAAGAAAAAATATAGGGGGACTCGATAAAGTGTCAAACCAAACAAGGACCTATACCAAAAAAGAGCGTAATATGTACCTCACCGGTATGCTGGGTCAAAACCTGATCTACAACATTGTAGCCACAGGTCTGTATTTCTATTTCCAAAATGTAATTTGCCTGCCGGCAATGGCTTTGGGCTGGATTTTTGCCCTGGCTCGTGTGTGGGACGCCATCAATGACCCGATGATGGGCACCATTGTGGACCGCACCCGTACCAAGTGGGGCAAATGCCGTCCGTACCTGATTATTTTCCCTGCCATTATCGGCGTGGTCACCGTTTTGGCATTCCTCAACGGCAACTATGCCACTGCCACTTCAAACACCCAAAAGGTGCTGATCGTGGCTTGGGCTGCTGTTTCTTACATCGCTTGGGGTATGTGCTTTACCGTGTGTGATATTCCGCTGTGGGGCATTACTTCCCTGATGACGGAGGACGAGGACGACCGCAGCAAACTGCTGGGCTTGGCTCGTATCGTTGCCGGTATCGGCGGCGTTGGCGTGCTGGTGGTGCAGATTGCCCAGGTTGTAGGCGGTATTTTTGAGGGCAAAGGCTATTCTCAGGCCAAGGCTTCTCAGTACGGCTTTATCCTGACCGTGATTATTATGACCGTGATCGCCACTGTTCTCTTTGAGTTTGCCGGCATCGGCACCAGAGAGCGGGTGGAGCAGGCAGAGAAAAAATATACCTTTACCGAGAACTTCAAAATTATGTTCCAGAACAAGCCGTTCCGCCAGATTTTGATCTCCGGTATTCTCAGAAGTCCCATTCAGCTGCTCATGCTCATTGCCATGACGCTGATTACCTATTATTACGCCAACGGCGACTTCATGAATGTGTTGAAAACAGACGATACCGGTGCTATGGTGGGTATTGACTGGAACATTTTGGTGCGCCTGGCTGTGATCGCCGCTGCTGTGTTCCTGGGTCAGTTTATCGCCATGGGCATTACTCCGTCATTGATTCGCAAGCACGAGAAAAAGAGCATTTATAACTTCTATTCCGTTGCAGGTGCAGTGCCTTTCGCTCTGCTGTATGTGTTCTTTAAGATCGCCCACGGCGATGTAAAGACCTCTATGGTATGGGTGGTCCTTACCGGGCTGTGCTTCTTCTTTGCAGGCGCTGCCATGGGTGGTATCAATGTGCTCCAGTCCGTGATGATCGCCGACTGCGTGGACTACGAGGAGTACCACAACGGCGTGCGTACCGACGGTGTATTCTTCTCTGGCCAGTCCTTTATCACCAAGCTGTCCGGTGGTATCGCCTCTATCCTGTCTGCTGCGGTGTACCACTTTGTAGGTTATAGTGACGCCAATATTTTGAAGCTGAATGAAGCCTTGAAGAGCGGCGCAGATTTCCTGAGCTATGACGGTGGTTCCGGCGCCGGTAAGTACGCCGCCACCATGTTCTTCCTGATCTCCATTCCGCCTGCCATCGGTATGGTTCTCTCCGCATTGCCCACCATTAAGTATGCAATGTCCGATAAAGAGCATAGCCGTATCCTGAGTGAGTTGGTGGCTAAGCGCGCCGCTAAGGGCGAGGACAGCGCTGAATAAGATCAACCAATAAAAACAAAAGCACCGCTGCGGCGGTGCTTTTTTGTGCGTTCTATGCCTTGCCCTTTAGAAAAGAGACTTTCAAAACTGTGCAAGGACGGCACAGCAATCCCTCTGTGCGCTTTTTACCGATCGTTGATATCGTGTACGCGTAAAAGACAAAAAGCGTGAATACAGCTGCTCTCCGGCCGCGCTAAAGGACAAGAACAGTGCACGCTGCTGCTAAAAAGGAAATACAAAGAAATGGATAATAAAAAGCGCTTCCCGCAGGAAGCGCTTTTTATGATTTTCAGGGTATTTAGGCTTCTTCGCTTTCCATCAGCTTTTCGCGCTTAGCCTCCAGCTCAGCCTGGGCCTGGGCCTTCACCTTGCCGGTGTACTTGTTAAAGAACATGGGAATGATGGTCAGGATAAAGCCCACAGCCGGTACAATGGTCACCAGCGCCAGCAGCATTTTTTGGGTGCTGACAGACTGCTCAAAGAAGATTTGACGCCCGGCGTTATCCATCAGGGATTTGTCTACGGCCTTAAAGTCCGTTTGCGCCAGCAGCTGACCGAACACGAAGGTGGCAATCGCGGCGTTTACCTTAGACAGGAAGGTTTGGAATGCAAAGCACACGCCCTCCTGGCGCTCGCCGGTCTTCCACTCCAAATAGTCGATGGAGTCGGCAATCAGCGCGTAGGTAATCACATTGTAAATGCCAAGGGGCAGACCCATCAGAAACAGGAAAATCCACAGGATAAAGATGTTGATCTTGGTTACATCTTGTGCCAAAATCACATAGCAAAGGCCGTGCACGGCAAAGCCAAACAGGGCGGAGCCAATGTAGATCTGCTTTAAGCTGAACTTCTTGCGCAGCAGAGGGAAGATGGCCATGGCAGGCACCATGCCCACGCCGATGGCTACGGTCAGGGTGGTCACAATGGTGCCGCGAGGAATCCAGAAGTCATAGGCTGCCGCAGCGTCCACATTGGGTACCAGGGTGCTTTGTGCGCCGGGCAGGAAGTCCATAAAGATTTGGCGGAAGTCTGTATAATTCTGAATAATAATGTAATTGCCGATATAGTCCGCGCATTGGTTGGCGGTAACCATAGTGGAGCCCAGAACGGAAGCGGCAATAACGATCAGCAGCAGCTTGTTCTTGCCCAGCACCACGAAAGTCTCTTTGAAGGAGGGGGTGTGGTCCATCTTGGGCACGCGCTCTTTGGATACAAAGAAGATGAGAATGGACAGCCCGCAGCCCAGCAGGGCAAAGATCAGGGCGCCTACAAAGAAACCTTTGTTATAGCCCATGTTGCTCTGGTACAGAATGGGCACCAGCAACGCCGGCAGAATGCCACCGAAGGTGGAGCCCAGGCGGGCGGTGGAAATAAAGGAAGTACGCTCACTCTCCAGCGGGGTAATCACAGAGGACAGACCCCAGAAAGGCACGTCCTGCACGGTAAAGGCCACACCCCACAGAATGTAGGTGATCAGCGCCCACACAAAAGCGGCGGTGGAACCCTCCTTAAAGGGCGCAGTAAACAGCAATATGGTGCAAATGGCAATGGGCACCGGTGCAAACAGCAGATAGGGCCGCATTTTGCCCCACTTGGACTTGGTGCGATCTACGATCATGCCCATCACCGGGTCATTGAGAGCGTCAAAGATACGGCCAATCAAGATGATTGTGGTACCTTGAGACAGGGACAGCCCGGCGCCGTTTTGGAAGAATACCAAGGTAAACATGGACATCAGCGTGTAAATACCGGAGCGGCCGAAGGCACCCACGGTAAAGCATATCCGCTCCCTGGTGGTTAGGTATTTTTTTTGTGGTTCGTTCATTATTTTTTCCTCACTTTCAGGGCGGGGAGAATCACAGGTGCGGCTTCTCCGGCATTTTTCATTTCACGCAGCAGCAGGTATTTCATCTCCTGGCGCACATGGCTGTAACGGGGATCACGGATCAGGTTGCAGCGCTCAATGGGATCCTTCTCCAAATCATAAAGATAATCCTCAAAGTATACACCGGCATTGTACTTTAGATAGCCGGTAGGCGCTAAGGTACGCACCGCGTATTTGAACCGGTCCGTACGAATGGCGCGGCCGCACTGGCTTTCGCTGATCTGCATAAACACACAGTCGTGAAGCGGCTGTGTCGTCTGCTGCATTTGGCACAGATCCTTGCCCATGTAACTGGGCGGTATGGGAATGCCCGCCAGGCTCAGGAAAGTGGGGGGCAGGTCGATGAGGGAGGTGAGCCGGTTCTCTGCCTTGCCGCCGTCAAAGCCGCCGCCTTTGATGATCAGCGGGGTGTGGGTGGCGCTGTCGTGGCAGGAGCGCTTGTACTCCAAATTGCGGGTCTTAAAGTGGCTGCCGTGGTCAGAGGAGTAGATGATAACCGTGTCGTCATAAATGCCCAGATCCTTGAGCTTTTGCACCAGGCGGCCCACATTATAGTCCAACCGATTGATGGCGGAGATATAGTCCGGGTACATCTCTTTATAGTCGCCCTTTAGGAATGTGAGGTCCGGGGGCAGAGGATAGTCCTTGTATTGATTGACGGTCTCTTTATAGCCCTCGTAATGATGGTGGTCGTTTTGGTGGTGGGGCTCCAGCTGGCTGATAAATAGGAAGAAGGGTTTGTCTGCCTCCCGTCCGCTCTCCAGGTATTCCAGGGCAAAGTCGTTAATACAGTCAGCCCGGTAGCCGGTAAAGTCCAGCTTGTTGCCGTCGCCGTCAAAGATATAGCCGTCATAGCCGTGGCTGGTGAATTCCAGCACATCCGCTGCCCGCCAGTAGCGGTACTCGCCCTGCTTCTCTTTTGGTACTGGCGTGGCCTCGCAGTGGGTGCCGATCCCCGGCAGCCGGTCAGAGGCCAAGTGCCACTTGCCCACATAAGCGGTGTCATACCCGGCTTCGTTAAAGTAATGGGCCAGCGGGGTAATGCTTTCCGGCAGGGGAATGCCGTTCCAGTAGCAGCCGCACTGGGTAGCATACACACCGGTTTGCAGGCAGGCACGGGCCGGGCCGCACACCGGCTGGCAGGTAAAGTTGTTCTCAAAGAGGGTGCCCTCTTTGGCCAGCTGCATCAGGTTAGGGGTCACCGTTTCATTGACGGTATCCCACCGCTGCTGATCGCTGAAGTAGAAGATGATGTTCTTACGCTTTGCCATGTTCAACTCCTGTTCCTGAACTGCACCCGTGGGCGCAGCGTATTGTCTTTTTATTTATCCGGCCATAAAGCCGGTGACTGCATTGTAGATGTTCAGGCAGATAAATACGCCCAGCACCGCGGAGAATACCCGGGTGACAATCTTGTTGTTGGCCTTTTTATTCAGTGCTGCGCCAATGATACCGGCAATCACAGCTGCCGGAGCCGCAATCAGCAGAATGCGGTAGTCGAACTTGGGCACCGTGGCGGTGGCTACATAGGTCACCAGCTTGGACAGCTGGCTAAAGAAGATGACGGCCACGCTGTACACAGTGGCTTCCTTCATGCTCATAGAGAAGAACAGCAGGAAGAACATAATGTTGATGGGTCCGCCGCCAATGCCCAAGAAGCTGGACAGAATGCCCAGCACGACGCCACCCAGAAGAATGGTGATTGGGTTCTTTAAGTGAAAGCTCTTTTTGCCCTTGTTCACATACCATAGAGCCACTGCCAGCAGACAGGCCAACAGTACAGCCTGGTAAGCCATAGCCAGGTTGTCGCTGAGCAGTCGGTTAAACAGATCAAAAATGTGCTTGCCTGCAAAGCCGCCTAAAATAGACCCGGCAGAGATCAGCAGCACGGTCTTAAAGTCCACCTTGGTCTTGGCACGCAGGTGCTTTACGGTGGAACTGCAACTCATGGCAAAAACGGACACGGAGGAGATAAAGTTGATGACCTCGGTGGTGTCGTCTACCAGCAGGGTCAGCAGCGGTTTAATAATCACCCCGGAGCCACCGCCTAAAAAGGCGCCGATGCCGGAAGCGAGAAAGATAATTACGCCGTAAACAACAAACATCATTGTTCCTTGCCCTCCGTCTCTTGCTCCAAGTAAACAGTGGCAGAATTGTATGCCAGTTCAAAGCCCTCTTTGTCGAGAAGCTCTTTGATTTGCAGGTTCAAACGATTTTTGATTTGCCCTAGCTCCACTACGGTGGGGGCGATCACACAATAGTACACCTGTACATCCATGCCGTGGGCACCGTAATTCACAAAATCTGTTCGAATATCGTCCTGTACCACTGCCGGATCGGCCTGCAACAGTGCTCGCAGATCCTGCTCAAACCGCTCTAAGTCTGTGCGGCTGTGTTTATAATGCAAAGTGAAAGTTTGGTCGATCAGTCGCTTTTCCATATCCGCATAGTTGATAATGCTCTGATTGGTCAGGGCTGTATTGGGCAACACATAACGGCTGCCGTCCAGCGCTCGCAGAGTGGTGGAGCGCACGGCAATGTCCTCCACCGTACCGCTTAATTCTCCAACGGCGATAAAGTCCCCCACACGAAACGGCTTGTTAAATACAATGATAAAGCCGGAGATCAGGTTCTCCACCGCATCTTTACAGGCAAAGGCCACAGCCACGCCGCCGATGCCTAAAGCGGCAAAAATGCGTGTGGCGGAGTAGCCCAGCAGTTCCAGCACCAGCAGTGCGCCGATGCAGATAATCACGATCTTGGCTACATTGGAGATAAAGCGAAAGGCGGTCAGCCGGGTTTTGTCCCCGCCGGCTGCCGTGTCAAAGGTATAATTGTCCAGCTCGCCGTTCAGTAGGCGTACGCCGCCCCAGCAGGCGCACACAATGCCGCCGGCCTTAATGAGAAACAGGCCAATCTTATGTAGCTCTCCGGAGGGGGCAATGATTTGCAGACCCAGGGCAATGCCGGCCAGTACCAAGAAAAAGGCCAGGGGCTTTTTCAGTCCGTCTTTAATCAGCGATTGCACCCGGGGTTTGCGGCGGCAAAAGGTCTTGCCAATGACGGTGAGTATTCCCCCGGAAATGATATTTCGTAACAGAAGCAGCACCACAACGCTCCCCACAGCGATCAGCGTGCGGATCAGCAGTTCTTCAGTGGTTTCTACCCCTTGTATGTTTTTGCGCAGGTTCTCTACGAACTGCGGTATTGCGATGGTCAGCATAGACATTCCTAACTGCCCTCCAAAGAGGACGCTTCATTTCATAAGCCGTAAAATCTATTATATAATTTGTAAAGAGCCTTGTCAATGCAGCGGGGCGTTAATGGTCGTTGTCGTCCAAATGGGTCGGAATACAGTAAAAATTGCTTTCCCACGCCGGAATGTACGGACTGTGGCGGAAGTACAGCTTGTAGTCCGGGCAAAGGCTTAGAATTTGCAGCGGCAGGGAGAACAAATCTTCGTTGCGATGGTAGGCGCATACATATAGTTTGGGCCGCCAGGTGATAATGGTGTGGGCGGCGCCGGTCAGCGCCTTGCTTTCACTGCCCTCAATGTCCATTTTCAGCAGGGTCACCGGCGCGCCTTGCAGCAGGCTGTCCAGATCCGTGGCTTCCACCGCCGTACCGGTGGGCGACAGATGGGAATTGCGCCCGGCGCAGGCATTAAAATGCAAAGTGGTCTGCCGGTCCCAGGCGCTTTTATTGTAAAGGTGAACGCCTTGCATACCCTCGGTGGAGCGGCACAGTTTTTTGAAGTTTTTTCTATCCGGCTCCAAGGCGTAAATGGATTTGTATTTTCCGCACGAATACTGCAAAAATTGGCGAATTGTGTCGCCGTTATAAGCGCCCATATCCACCAAAATCTCCTGTTGGTTCACTTGCAAAATTTCGGTAAAAATCTCGTCCATATTTGCAAATGAATTGTAAAGGTAATCAACTTTACCACTGATTTTGTAACGCAATACGGAATTATATACCCGGCGGCTCTCCTCATCGGCCAATTTGGCGTAAACAGTCTCTATTTCCGCCCGGTGGGCAGCGGCGTATTCCCGGGTAAACAGCCCGACACCGGCCACCGGAATATCCGGTGCATACACCGGGTGCTCCTGATGGATCCGGGCGATGTTTTCCAGTACCTCCGGGCGCTGGCTGGCAAAGCCCAGTACCACATTAAAGTCCGTAAATTGCGCGCACACCTCCCGGTAGCGCTGCACCGTGTGGCCTAAAAAAGACTGGCCTCGCACAAAATCATCACTGGCAAAGACCGCAGTGATGTGCATTCCCTTGCTTTCTAACACGGCATTGATTTTCTCCGCCCCGTCGCCCATGCCATAGAGCACCAGGGGCTTGCCCTCCCGGCGCAGTCGGTCCCAAACATTCTCTTCCGTCAGCAAATCGTCTATCATAGCTACCTGCCTTTCTGCTTTATATTTTAACATATTTGACAATCTAAAATAAAGTGTATATAATAAATAAACGGAAAAATTTGTATTGCACAGGAGGCAGGGGCCATTATGGGCGGGAACAGCCTGATTGACCGATTATTTAAGCGCGAGAGCACAACGAAAGAGGAAATTCGCCAGCTGGTGGACGAGGACCAGGCCAAAGGAGAACTAGAAGCGTCTCAGCGGGAGATGATCCACAATATCTTTGATTTTGACCGACTTTGTGCGGAGGATATTATGACCCATCGCACAGAGATCGAGGCAGTGGAGGAGACGGCCACCATCGGCTATGCCGCTGCCTTTGCACTGGAGGCAGGGTGCTCCCGGATCCCGGTATTCCACGAGGATTTGGATAATGTGCAAGGCATTCTCTATGTAAAAGACCTGCTGCCCTTTGTGGGTAAGCCTGTGCCGGCGGGCACCCGGCTGACGGACTATGTGCGGGAGCCGCTGTTTGTACCGGAGAGTATTCCCTGCGGCAAGCTGTTCGCCACCATGACGGACAAGCGTATCCAGATGGCTATTGTGGTAGATGAGTACGGCGGCACTGCCGGGCTGGTGACCATGGAGGATATTCTGGAAAGCATTGTGGGCAATATTATGGACGAGTACGATGAGGAAGAGGCGGATGTAATCCAAACCGGGGAGCACACCTTCACCTTTGATGGCTCGGTAGATATGGAGGACGCGGAAAAGGCGCTGGGCGTGCCCTTGCCGGAGGGGGATTATGACACGCTGGCAGGCTTTTTGATCAGCCGCCTGGGCTATCTTCCCACCGGCAAGGAGACCCAGCCGGTGACGGTGGATTATGAGAATGTGCACTTTACCGTTTGCGGGGTAGAGGAGCGCAGAATTGAACGGATAAAGGCAGAAGTTAAAGTATGACAGAACAGGTAATCACCTTTGAAGCGATGGAACAGGCAGCGAACCTGTTTGGCAGCTTCGATGAAAACATAAAGCTATTGGAGCGGGAGTACGGCGTGACCATCACCTGCCGGGGTGCAGACCTGAAGGTGGTGGGGGACGCAGAGAATGTGGCCGCCGCTGCCCGGGCGCTGAACGGACTGCTGACCCTAATTAACAAAGGCGAGCAACTGACGGAGCAGAATGTGCGCTATGTGATCTCGCTGGTGGGCGAGGGCAACGAGGAGGTGCTCTCCTCCATGACCACGGACTCGGTGTGCGTGACGGCCAAGGGTCGCCCGGTGAAGCCAAAGACCGTGGGTCAAAAGCGGTACTGCGAGTCCATCGCCAAAAACACCATCACCTTTGGCGTGGGCCCGGCCGGTACAGGCAAAACTTACCTGGCTGTGGCAATGGCGGTTACCGCCTTTCGTGCCAAAGAGGTGAACCGGATCATTTTGACCCGCCCGGCGGTGGAAGCGGGGGAGAAGTTGGGCTTCCTGCCCGGCGACCTGCAAAGCAAGGTGGACCCGTACCTGCGCCCATTATATGACGCGCTGTTTGATATGCTGGGGGCTGAGAGTTTTCAGCGCTACCAGGAGCGAGGCGCTATCGAGGTGGCACCACTGGCCTATATGCGTGGGCGTACCTTGGACGACAGCTTTATTATTCTGGATGAGGCCCAAAACACCACGCCGGAGCAGATGAAAATGTTTTTGACCCGCCTGGGGTTCAACTCCAAAATGGTGGTCACCGGCGACATTACCCAGATTGACCTGCCGGAGGGCAAGCGCTCCGGGCTGGTGAAGGTGATGGACATTCTAAAGCATGTAGATGATATTGAAATTCATAAATTCAGCCAGAAGGATGTGGTGCGCCACCGGTTGGTGCAGGACATTATTCGGGCGTATGAAAAATATGAGGAGAAAAACAAGTAATGGAATCTGTAAAAGTGGTCATTTCAAACGATCAAAAGGCAGTGAAGGTGCCTACCGGTATTCGGTTGCTGATCCGCCGTTGTTGCCACGCCGTGCTGGAGCTGGAGCATTTCGAGGGCAGCGCAGAGGTGAGCGTGCGCTTTGTGGATAACGAACAGATCCGTGAGCTGAACAAAGAATATCGGAACATCGACAGAGAGACGGACGTACTTAGCTTCCCTCTGGGGGAGAACGGTGTGTACGACATTAACCACGACACCGGCGCCAAGCTGCTGGGGGATATTGTGATCTCTATGGAGAAAGCCATGGAGCAGGCAGAGCTGTATAATCACCCCTTGCAGCGGGAAATCGGCTTTTTGACCGTCCATTCCATGCTGCACCTGCTGGGCTACGACCATGAGCAGGGCGGACTGGAAGAAGTGCGTATGCGCGAAAAGGAAGAAACCGTGCTGACCCAAATCGGCTGGAAGCGGGACAGTAGCTATTACATGGGAGACGAGTCATGACCCGATCTGCATTTATCGCCATTATCGGCAAGCCCAATGTGGGCAAATCTTCTATTTTGAACCGACTTACCGGCAGCAAGATCGCCATTGTGTCTTCTAAGCCACAGACCACCCGTACCAAGATCATGGGCGTGCTGACTCGGGACGAGGTGCAGTTGGTGTTTACGGACACCCCCGGCTTTCACCATGCCCACAACAAGCTGGGCGAGCATATGAACCAGGCAGTAGGCGACACGGTAGGCGGCGTGGATGCCTGCCTGTTTGTGGTGGAGCCTAAGGGCGAGCTCAACGACAAGGAGCAGGAACTGCTGGCAATGTGCAAAAAGCAGCGCTTGCCGGTGATCCTGGCCATTAACAAAATTGACATGTTGCGGGACAAGACGGAACTGGCTCCCCGCATCGGCCAGTTGGCAGGGCTGTATGACTTTACGGCTGTGGTGCCTTGCAGCGCCCAGACCGGCGAGGGTGTGCAGGATCTGCTGACGGAGATGGAACGCCTGGCGCAGCCGTCGCCCCATTTTTTTCCGGACGATACCTTGACGGATCAGCCGGAGCGGGTGCTGGCGGCGGAAATGATCCGGGAGAAGATCCTGCGCCTAATGGATAAGGAGATTCCCCACGGCATTGCCGTTGCCATTGAGAAGATGAAAGAACGCCCGGACGGCAGCTGTTTGGATGTGGACGCCACCATTTACTGCGAGCGGGAGAGCCATAAGGGTATGGTTATCGGCAAGGGCGGCGCTATGCTTAAAAAGATCGCCACATTTGCTCGGCAGGATATGGAGCGCTTTTTCGGGATCAAGGTCAATCTGCACACCTGGGTTAAGGTGAAAGAAGACTGGCGTAACCGTGAGGGCCTGATCCACAACTTTGGTTTGGATAACGAATAAATTGATTTTTTGCCGCTGCGGTGTTGGATTTTGTCCTTGGATGAATTTGGCACAAATGGCGCTGCACGCATAGGATACAATAAAAACGGTGATCCTATGTCGATGGCAGAGAACAGCTGGCAACAGTTTATACAAACCGGCCGTGTGGCCGATTATTTGAAATACAAGGAAGAGGAACGACAAGAGGGGCATGAACAGTACCACCAAAGGGTTAGTGATACGGGAGCAGACCACCGGGGAGAATGATCGCCTGGTGACTTTGCTGACGGCGGATCACGGGCTGGTGCGTGCGTTTGTACGAGGCGGCAAGCAGCTGAAGAATCGGCGTGCCGCTGCCACCTCTCTTTTTTGCTATGGCGAGTTTGCCCTGTACCGTGGGCGCGACGCTTATACGGTAGACAGTGCAGCACCCATTGAGGTGTTTTTTGGCTTGCGGCAGGATATTGATCGGCTGGCAGCAGCCCAATATTTTGCTCAGCTCAGCTACGAATTGGCGGCGGAGGAACAACCGGCGCCGGAATTGTTGCGCCTGCTGCTGAACACCCTGCACCTATTGTGCAAGGGCACCAAGCCGCTGGTGCAAATCAAGGCGGTGTTTGAGCTGCGCGCCCTGTCCATCTCCGGTTATATGCCCAATATTTTGGCTTGTGCCAACTGCGGTACTTATGAAACACCGGTGATGTACTTTGATGTGGACGGGGGCTGCATTTACTGTGAGAATTGTCCCAAGGCAGGCGCCGTGGCGGTACCCAAGACGGTGATGACCGCCGTGCGCTACATTTGTCTGACGGAGCCGGGGCGTATTTTTGGCTTTGCTCTGTCGCCGGAGCAAATGGCACTGCTGGGCCGGGTGACGGAGCAGTACACCCTGCGGCGGCTGGACCGGCGCTTTACCACACTGGAATTCTACAAATCCCTGCAAGCCGGGGACGCGACTACATAGCATCATAATGGATAGAGATATGGATAAGAATTTGCAAACCTTGGAACTGGATAAGGTGCTTGCCCTTTTGGCGGAACAGACCACCTGTGACGATGCCAAAGAGGCGGCATTGGCGCTGCGCCCTGCGGCAGACCCGGGGGAGATTGCTCTCCTGCTGGATCAGACGGAGGACGCTTTTTCTATGCTGGCCCGGTTCGGCGCGCCGTCTTTTGGCGGGCTGCATAATGTAAATGGCCCACTGCAGCGGGCGGCAGCCGGCGGGTGCCTGAATATGACGGAGCTGTTGCAAGTGGGCGACACCCTGCGGGCGCTGCGCATTCTGGACGACTGGCACGGCCATTTGGCGGGCACAAGCTCGTCCCTGAATTTCTTTTTTGACGGCATTACGGTGAACAAATATTTGGAGAACCGGATCTTTACCTGCATTGTCAGTCCGGAGGAGATGGCGGATAAGGCATCGGAAGAGCTTTACGACATTCGGCGGAAGATCAAGGCCAAGGCGGCGGCCATTCGGCAACGGCTGGACGGTATGATCCACTCCACCCATTACCAAAAATTCTTGCAAGAGCCTATCGTCACCCAGCGTGGCGGGCGCTTTGTGGTGCCGGTAAAGGCGGAGCACCGGGGCGAGGTGCCCGGGCTGGTACACGACACCTCCTCCAGCGGCGCTACGGTGTTTATCGAGCCGGCGGCGGTGGTGGACGCCAATAATGACATTAAGGTGTTAGAGGGCCGGGAGCGGGAAGAGGTGCAGCGCATTCTCTTTGAGCTGTCTGCAGAGGCAGGCACTTTTGCAGAGAGCGTGCGCCACAGTTATGACAGTGCTGTGCGGCTGAACTTGATCTTTGCCAAGGCGCACTTGGCATACCAAATGAAAGCTGCTCGTCCCCAGCTGAATACCGAGGGCGTAACGGATTTGAAAAATGCCCGCCATCCGCTGATTGATAAAGAGCGGGTGGTGCCGGTGCATATTACCCTGGGCGCGGACTATGATACGCTGGTGATCACCGGCCCCAATACCGGCGGCAAGACGGTGACCTTAAAGACCCTCGGCCTGCTGACGGCGATGGTGGGCTGTGGGTTGTTGATCCCGGTATCAGACGGCAGCAAACTGGCGCTGTACCGTCAAATCTTGGTGGATATCGGCGATGAACAGAGCATTGCCCAAAACCTGTCCACTTTCTCCTCTCATATGGTGAATATTATTGATATTATGGGCAAAGCGGACGAAGACTCCCTGGTGCTGATCGACGAGTTGGGCGCCGGTACGGATCCCATCGAGGGCGCGGCGCTGGCAGTGTCTGTCATTGAATATCTGCGCCAAAAGGGAGCGCACATTGCCGCCACCACCCATTATGCGGAGCTGAAAGCCTATGCGCTGGATACGCCGGGGGTCAGTAACGGCTGCTGCGAGTTTGATGTGGAGACCCTGCGGCCTACCTATCGGCTGCTGATCGGCGTGCCCGGTCGGTCCAACGCCTTTGCCATTACGGAGCACCTGGGCATGGATCCGGCGGTCGTGCGGGCAGCTAAGGAGATTGTTGGCTCGGAGAACCGGCAGTTTGAGTCTGTGCTGGAGAACCTGGAGAGCGCTCGAAAGGCTCTGGACGAGGAGCGGGCAGCGGCGTCCAAGGAACGGCAAGAGGCGGAGCGGCTGGCTGCCAAGGCCAGAGAAGAAAAGTCCAAGATCGACACCCTGCGGGATCGAGAACTGGACAAGGCTAAGCGAGAGGCACAGCGGCTGGTAGATGCTGCCAAACGCACATCTTCGGACTTCCTGCTCCAGCTGGAGCAGTTGAAGAAAGAGCAGACTGCCACCAACGCCACGGAATTGGCCCGCAAGACCAGGCGAGAGATCAAAAATCGCTTGGGTGAGTTGGACGATATTGTGAACCCCAACCGGCTGAATACCGATTGGGATACGGATTATAAGTTGCCCCGCCCCTTGCAGGTAGGGGACCATGTGCTCATCAAGGGCATTGGTGAGGGCGACGTGCTGGAACTGGGCAGTAAGATCTTGGTTTCCTCCGGTATGCTGAAAACGCGGGTCAAGCCGACGGATCTGCGCCTGCTGCCGCCCAAGAAAAAAGCGCCGATCACCGGCCAGCGCACCCTGCGGCGCACCACCTCCCGGGCAGACGCGGATGTAAAAACCGAGCTGGATCTGCGAGGCCAAACGGTAGAGGAAGCCCTGGGCAACCTGGGTCTGTTTATTGATAAGTGCGTGCTCAATAACATATCCGAGGTGCGCATTATCCACGGCAAAGGTACCGGCGCGCTGCGTACCGCCGTACAGGAAGAACTGCGCCACCACCCCAATGTGGCCGAGTATCGGCTGGGGGTGTACGGCGAGGGCGAGAACGGCGTGACCATTGCCAAGCTCAAGTAGCCCCTATATATAAACATACTATAATATAGCGATTTGCACAGCGTTCAGGCCGATCGGCTTGGGCGCTGCGTTTATTTTATTGGTACAATGTCGTATAACTTTTGCTGCCAAAAATTAAATTTTTCAAAAATTCGGTCAAAGCGACGCGACGAAATTTTTCCACGGCGCGGGGCGTTTCTTACTAAATATGGAGAACGGCAACTACATCTTGTGGTTCGACAGGGGAGAGACACCAAAAAACAGGTGGTTCTGCTTTGGTGATTTTTACAAAAATGGAGCCGGATTTTCTGTCATTTTGCACAATGAAAAAAATTCCAAAGAACTTCAAAAAAAGGCTTGACAGCAGGGGCTCTATATAATATAATATTGCCTGCGTGTGATTGGGCGTATTATATATATAATATATAGACACCGCAACACACAACCAGATATGCGTTGATGCCGGAGGTTGCGCTCCTACCCAGAGCGGTAATTTCGGCGGAGTATGTCCGATTTCAAACCGGGCGAAACGAATCATTGTACGACGCGGACCGTAAGGGGTCCCTGCAGAGCGTGACTTGCGAACGCGCTGTGCACCGTGTAACCGTGCCCGAATGAACTGCCTTCATTCGGCTTTATTTACGGTAAGGGTTGAAACACACGGGTGGGTAGTCAAACAATGGTTGCTCGCACCATCAAAATTCATGGAGGAATTTCACATGGCAGCAAGTAAAGTTAAGATCCGCATCAGACTGAAGGGTTATGACCACAACCTGGTGGACCAGGCTGCGGAGAAGATCGTAGACACCGCAAAGCGCACCGGCGCTCAGGTGAGCGGTCCCATCCCGCTTCCCACCGAGAAGGAAGTTGTTACCATCCTGCGTGCTGTACACAAGTACAAGGACAGCCGTGAGCAGTTTGAGCAGAGAACACACAAGAGACTCATCGACATTCTCAGACCTTCCAACAAGACGGTGGAAGCGCTGACAAGTCTTGAGCTCCCGGCAGGCGTTGAGATCGAGATTAAGCTCTAATTGAACTGAAAACAGATCGCAACCCGGTCGAGGTCATGTTGGGGAGACCCAACCAATAACCAAAGGAGGAATAAACATGAAGAAAGGTCTTATCGGTAAGAAAATCGGCATGACCCAGGTCTTCGACGCACAGGGTCATGCAATCCCTGTAACCGTTGTGGAGGCCGGTCCTTGCACGATTACCCAGAAGAAGACAATGGAGAACGACGGCTATGAGGCCATTCAGGTGGGCTTTGGCGATGTGAAGATCACACGCGTCAACAAACCGATGAAAGGTCATTTTGACAAAGCCGATGTGGCTCCCAAGAAGACACTGAAAGAATTTCGTCTGGACGACATTTCCGCAATGAATGTAGGTGACATCCTGAAGGCCGATATTTTCGCTCCCGGCGAAAAGATCGATGTGAAGGGCACCAGCAAGGGTAAGGGCACCGCAGGCGCCATTAAGCGCTGGAACTTCTCTCGTCTGAGAATGAGCCACGGTACCGGCCCCAACGCCCGTCACGCCGGTTCTTTGGGTGCCTGCTCCAGTCCTTCTCGCGTATTTAAGGGCAAGAAGATGGCAGGTCACCTGGGTCACGAGACCGTAACCGTTCAAAACCTCGAGGTTGTTAAGGTGGATGCCGAGAATAACCTCATCGCCATCAAGGGCGCCGTTCCCGGCCCCAAGGGCGGCATTGTTGTCATCGCTGACGCAGTGAAAGCTTAACGAAAGGAGAGATTAAAATGGCACAGGTTCAGGTTTATAACCAGGAAGGTAAGAAAACTTCTAAATTGGAACTTGCAGATTCCGTTTTCGCCATTGAGCCGAACGAATCCGCAATGCATCTTGCAGTGGTCAGCTATCTGGCTAACCAGCGTCAGGGCACACAGTCAACTCTCACTCGTTCTGAGGTCAGCGGCGGCGGTGCAAAGCCCTGGAGACAGAAAGGCACCGGTCGTGCCCGTCAGGGTTCTACCAGAAGCCCGCAGTGGACCCACGGCGGTATTGCTCTCGGCCCGAAGCCCAGAACATACGGCATCAGCATCAACAAGAAGGTGCGCAGACTGGCTATGAAGTCCGCGCTGTCCAGCAAGGTTGCTGCTGAGGAGATGATGGTAGTTAACAAGGTAGAGCTGGAAGACATTAAGACCAAAGCTGTGGTCGAGATGCTCACCAAGCTGAAGGCTGCCAAGAAGACCCTGATCGTCACCGCAGATAAGGACGAGAAGATTTATAAGAGCGCACGGAACATCGCCGGCGTTAAGGTTGTGACCGTCAACACCCTTTGCGTGTATGACATCCTCAACTGCGACAGCTTCGTTGTTCTGAAGGACGCCGCCAAGAAGATCGAGGAGGTATATGCATAATGAAAGCTGCACAGGACATTATCATTAAGCCGATCATTACGGAAGAGTCCATGACCGGCATCATGATGAAGAAATATACCTTCAAAGTTGCCAAAGATGCCGGCAAGATTGAGATCAAGAAGGCTGTTGAGGAACTGTTCCCCGGCACCAAGGTGAAGAAAGTAAACACCCTGAATGTAAGAGGTCAGAAGCGCCGCCAGGGCGCCAATGTGGGTTACACCCCCTCTTGGAAGAAGGCTGTGGTTACCCTCACCGAGGACTCCAAGGAGATTGAGTTCTTCAACGATATGATGTAATCTCTTATACATTATATATACAAACACTAAGACAACCATGATTTCGGGTGATGAGGTATGAAAGGAGCCATCCTTTCGCAAAGTTATCCGGAAAGGAGAAATAAGAATGGCAATCAAAACTTATAAGCCGACTACGCCGTCCAGACGGAATATGTCGGTTACCGATTACTCTTCTCTGTCCAAGGTTGCTCCGGAGCGTTCTCTGCTTCAGCCGCTGAACAAAAAGTCCGGCCGCAACTCCTACGGCAGAATCACCGTTCGTCATCGTGGCGGCGGTAACAGAAAAAAATACCGTGTGATCGACTTCAAGCGCAACAAGTTCGATGTTCCCGCTGAGGTCAAGACCATTGAGTATGATCCCAACAGAAGCGCGCACATCGCTCTCATCCAGTATGAGGACGGCGTGAAGAGCTACATCACCGCTCCCGAAGGCCTGAAGGTAGGCGACACCGTGTTAGCCGGTACGGATGTAGACATCGTGGCCGGTAACGCTCTGCCGCTGCAGAACATTCCCGTTGGTACCATGGTACACAATGTGGAGTTGTATCCCGGTAACGGCGCACAGCTGGCTCGCTCTGCCGGTAACGGCGCACAGCTGATGGCTCTGGAAGGTCCGTACGCACTGCTGCGTCTGCCCTCCGGCGAGCTGCGCAACGTGCCCTGCACCTGCATGGCTACCATTGGCGTGGTTGGCAATGCCGATCATGCAAATGTGAAGATCGGTAAGGCCGGTCGTAAGCGCAATATGGGCTTCCGTCCCACTGTTCGCGGTTCTGTAATGAACCCCAACGACCACCCGCACGGTGGTGGTGAAGGTAAGTCTCCCATCGGCCGTCCCGGTCCTTGCACCCCTTGGGGCAAGCCTGCTCTGGGTTATAAGACCCGCAGCAAGAAGAAAAAGTCTGACAAGATGATCGTTCGCCGTCGCAACGGTAAATAAGAAGAAAGGAGAAGATTAAATGAGTAGAAGTGCCAAGAAGGGCTTTTATGTTGAAGAAAGCCTGTTCAAAAAGGTTGAAGCCCTGAACGCTAAGGGCGACAAGCAGGTTATCAAGACCTGGTCCAGAAGTTCCACAATCTTCCCTGAATTCGTAGGTCATACCTTTGCTGTTCACGACGGAAGAAAGCATGTACCGGTCTATGTGACCGAGGACATGGTCGGCCATAAGCTGGGTGAGTTCGCGCCCACCAGAACATTTAGAGGCCACGCAGGCTCCAAGTCATCTAAGTAATCGGAAAGGAGATTTATTATGGAAGCTACAGCAAAAGCAACGTACGTCCGTATCTCTCCCAGAAAGGTTCAGATCGTACTTGATTTAATCAGAAAGCAGCCTGCCGACAAGGCCATGGCTATTCTGCAATACACCCCCAAAGCCGCTTGTGAGCCTGTGATGAAGGTGCTCAAGTCCGCGATGGCAAATGCAGAGAACAACAACAATATGGATGTTTCCCGTCTGTATGTGAGCGACTGCAATGTAGGCGCCGGCCCCACTCTGAAGAGAATTCAGGCCAGAGCCCAGGGCAGAGCTTACAGAATCAACAAGAGAACATCTCACATCACCATTACCGTTAAGGAAATGGAAGACTAAGCGAGGAGGAAGAGTTAAATGGGACAGAAATGTAATCCTACCGGTCTCAGAATCGGTGTCATTAAAAACTGGGACTCCCGCTGGTACGCAAAGAAGGGCGAGTTCGGCGATACCCTTGTAGAGGACTACAAGCTGCGTAAGTATCTGCTGGAGACCCTTTCCGGCGCAGGTGTTCCTAAGGTGGAGATTGAGCGTGACGCCAAGCGTGTGCGCATCAACATCCACTGCGCAAAGCCCGGTATGGTGATCGGCAAGCAGGGCGCTGAGATTGAAAAGCTCAGAGCGCTGTGTGCCAAGAAGCTGGGCAAAGAACTGAACGAAGTTTACATCAACATCGTTGAGATCAAGCAGCCCGATCTGAATGCAACCTTGGTTGCTCAGAATGTGGCCGGTCAGCTGGAGCGGCGTGTATCTTTCCGTCGTGCAGTAAAGGGCGCTATCCGCAACACCATGCGTTTGGGCGCTCGCGGTATTAAGATCCAGGTCAGCGGCCGTGTAGGCGGCGCCGAGATCGCGCGTACCGAGACATACAAAGAGGGTACGATCCCGCTGCAGACCATCCGTGCAGATATTGACTACGGTTTGGTTGAGGCTAAGACCACTTACGGCCGTATCGGCGTAAAGGTTTGGATCTACCAGGGCGAGGTTCTTCACGAGTCTCGTAATAAGAGAAGAAATCGTCGGGAAGGAGGAAATCGATAATGCTGTTACCTAAGCGTGTTAAGCACCGCAAGCAGCACAGAGGTCGTATGACCGGTGTGGCTACCCGCGGCAATAAAGTTACCTACGGTGAGTACGGTCTGATGACCACTGAGCCTGCATGGATCACTGCGGCACAGATCGAGGCTGCCCGTATCGCTATGACCCGTTACACCAAGCGTGGCGGTCAGGTATGGATCAAGATTTTCCCCGACAAGCCCATTACTGCGCGTCCTGCCGATACCCGAATGGGTAAAGGTAAAGGTAACGTGGATTACTGGGTAGCCGTGGTAAAGCCCGGTCGCGTTATGTTTGAGCTGGGCGGCGTTGAGGAGTCTGTGGCGCGCGAGGCTATGCGTCTTGCTGCCAACAAGCTCCCTGTAAAATGCAAGTTCGTTAAGAAAGAGGGAGGCGAGCAGGAATGAAAGCAGCAGAAATCCGTGCTTTGAGCGCCGATCAGCGCGCAAAGAAGTTGGCAGAGCTCAAGGATGAACTCTTCAACCTGCATTTCCAGCAGGCCATCAATCAGCTCGACAACCCTATGAGAATTAAAGCGGTCAAGAAGGACATTGCACGCATTAAGACTGTGGAGCGCGCAATCGAACTCGAAAGCGCTAACTCTTAAGAAGGAGGTAACTGATCATGGAAAGAAACCTCAGAAAGACAAGAGTTGGTCTTGTTTCCAGCGATAAGATGGATAAGACAGTTGTGGTTAGCATTCAGGACAGAGTGGCTCACCCGCTGTATGGCAAGATCGTAAACCGTACCGTGAAGTACAAAGCACACGACGAGAAGAACGAATGCGGCGTAGGCGACAAGGTTATGATTATGGAGACCCGTCCCTACAGCAAAGACAAGAGATGGCGTGTGGTTGAGATCATTGAAAAGGCTAAATAATTCAAACGGATTACTTGGTTTTTCATACAGACTGCTTTTGCAGTCGGAACTAAAATAATAACTGCAAGATGAGCAAAGTGTTATTTTGCAGTACGAAGGAGGAAAATGCTGTGATACAACAGGAAAGTCGGCTGAAGGTCGCAGACAACACCGGTGCTAAAGAGATCCTTTGCATTCGCGTGCTGGGCGGCTCCGGCAGAAGATACGCCAACATCGGCGACGTGATCGTTGCTTCCGTCAAGAAAGCAGCACCCGGCGGCGTGGTGAAAAAGGGCGAAGTTGTTAAAGCAGTCATCGTTCGTACAACCAAAGGTGTACGTCGTGACGACGGCCAGTACATTCGTTTTGATGAAAATGCTGCCGTAATTATCAAAGAGGATAAAACGCCTCGTGGCACCCGTATTTTTGGACCCGTAGCAAGAGAGCTTCGTGATAAGGATTACATGAAGATTTTGTCCCTTGCTCCGGAAGTGCTTTAATGGAGGTGCGAGAGAATGAGTAAGATGTTTGTAAAATCCGGCGATACCGTTCAGGTGCTGTCCGGTAAATCCAAGGGCGTGCGCGGCGAAGTTGTTGCTGTTAGCCCTGCTGAGGGTAAAGTCATCGTCAAGAAGGTCAATGTGGTTACCAAGCATGTAAAGCCCCGCAAGATGGGCGAGGCCGGCGGCCTGATTGATGTTGAGTCCGCGCTGTACGCTTCCAAGGTACAGCTGGTGTGCCCCAAATGTAACGAGGCGACCCGCGTCGGCCACAAAAAGGGCGGCGCACGCATTTGCAAAAAATGCGGCAACGAATTTTAAGTAAGGGAGGAACATAACAATGGCTGCAAGGTTAAAAGAAACCTATAAGAGCGAAGTTGCTCCGGCATTGATGAAGAAATTCGGCTACAAATCTGTTATGCAAATCCCGAAGCTTGACAAGATTGTTATCAATGTTGGTTGCGGCGAAGCCCGCGAAAACTCTAAGGTTGTAGATGCAATCATCTCCGACCTGTCCCAGATCACCGGTCAGCGCCCCGTGGTGTGCCGCGCAAAGAAGTCTGTTGCAAACTTCAAGCTGCGTGAGGGCATGCCCATCGGCGTAAAGGTCACTCTGCGTGGCGAGAGAATGTATGAATTCCTGGACAGATTCTTTAATCTGGCTCTCCCCAGAGTGCGTGACTTCAGAGGGATCAATGCAAACTCCTTTGACGGCCGTGGTAACTACGCCATGGGTATCAAAGAGCAGTTGATTTTCCCCGAGATCGAATATGACAAGATCGACAAGGTGCGCGGTATGGATATCATTATGGTAACCACCGCAAACACAGACGAAGAAGCACGGGAGCTGCTCAAGCTGATGGGCGCACCGTTTGCAGAGTAAGGAGGGATTATCGTGGCAAAAACATCTATGAAAGTCAAGGCAGTTCGTCCTGCCAAGTATTCCACCAGACAGCACAACAGATGTAAGATCTGCGGTAGACCTCACGCATACCTGCGTAAGTATGGCGTGTGCCGTATCTGCTTCAGAGAGCTGGCTCACAAGGGCGAGATCCCCGGTGTGCGCAAGGCATCTTGGTAATCTGAGAATTGAAGATCGAATAAGGAGGAAATATCAATGCATATTACAGACCCTATCGCTGATATGCTGACCAGAATTCGCAATGCGAATTCCGCAAAGCACGATACTGTAGATATTCCCGCATCTAACATGAAGAAGTCAATTGCTCAGATTCTGGTAGATGAAGGTTATATCAAAGGCTACAAAGTAATTGAAGACGGCAAGCAGGGCGTTATCCGCGTGACCCTGAAGTATGGCGAGGGCAAGAGCCGCGTCATCACCGGTCTGCGCCGCGTGTCTAAGCCCGGTCTTCGTAAGTATTCAAGCGTTGAGGATATGCCCAAGGTAATGAAGGGCCTGGGCGTAGCCATCGTTTCTACATCTAAAGGCGTAATGACAGACAAAGAAGCTCGCAAAGAGAATGTGGGCGGCGAAGTTCTGGCATTTATTTGGTAAGGAGGTGCAGTCGTATGTCACGAATTGGCTTAAAGCCTATTGAAATTCCTGCCGGCGTTGACGTAAAGGTTGACGGAACGACTGTTACCGTAAAGGGCCCCAAAGGGGAACTTACCCGGAATGTTCATCCGAACATGACAGTCGTTGTAGAAGGCAACGAAGTTATTGTAAAAAGACCCAACGATGAGAAGGAGAACAAGTCTCTTCACGGCTTGACCCGCACCCTCATTCACAACATGGTTCTGGGCGTGACCGAGGGCTTCAAGAAGAATCTGGAAGTCAACGGTGTTGGTTACAGAGTACAGGTACAGAACAACAAGCTCACAATGAACCTTGGCTTTTCTCACCAGGTGATCATGGACGCACCGGAAGGCATTACCATTGAGTGCCCCAGTGCCAACGCCATTGTCATCAGCGGCGCAGACAAGCAGGCCGTTGGCCAGTTTGCCGCGCAGGTTCGCGAGAAGAGACCCCCGGAACCCTACAAGGGCAAGGGTATCAAGTATGACTATGAGCATATTCGCCGCAAGGAAGGCAAAGCAGGTAAGAAATAAGGGAAGGAGTGAATTACAATGGTTTCAAGACAAGACGCCAATAAGGCAAGACAAAAGCGCCACATTCGTGTTCGTGGCAAAATCAGCGGCACTGCTGCTCGTCCCAGACTCAACGTATATCGCTCCCTCAGCAATATTTACGTTCAGCTCATTGATGATGTTGCCGGTGTAACGCTGGCAAGTGCATCCACTACTGAGAAGGACTTTGCACAGTACGGCGGAAATGTAGAAGCAGCTAAGGCTGTTGGTAAGACATTAGCAGAAAGAGCCACCGCAAAGGGCATCACCGAGTGCGTATTTGACCGTGGCGGTTACGTGTATCACGGTCGTGTGGCTGCGGTTGCAGACGGCGCTCGTGAGGGCGGACTGAAGTTCTAACGAAGGAGGTAAATACTTTTGGCTACAAAGATTGACGCATCTTCAATGGAACTTGAAGAAAGAGTGGTTACCATCAACCGTGTTTCTAAAACCGTAAAGGGCGGTCGAATTTTTAAGTTCTCCGCACTGGTGGTTGTTGGTGATAAGAACGGTCTGGTCGGTTTCGGTATCGGTAAGTCCGGCGAGGTTCCGGACGCTATCCGTAAGGGGATCGAGGACGCAAAGAAGAATCTGATCAAAGTATCTCTGCGGGGTACGACCATTCCCCATGAGATCACCGGTAAGTTCGGTGCTGGCGAAGTTCTGCTTATGCCCGCTCCCAAAGGTACCGGCGTGATCGCCGGCGGCCCGGTTCGTGCGGTTGTTGAGACCGTTGGTATCGGCGATATTCGTACCAAGGCCGTTCGCTCAAACAACCCGTACAATGTGGTTCGCGCCACCATTGACGGCTTGAGCAGACTGCGCACGGCAGAGGAAGTTGCTGCTGTTCGCGGTAAGTCAGTGAAAGAAATCGTAGGATAAGGAGGGGCGCATTATGGCAGATATTAGAATCAAACTTACAAAAAGCCTGATCGGCAGTAAGCAGGACCAGATCGCCACCGCCCACTCTCTTGGCCTGCGGAAGATCGGCAACGAAACCGTTCAGCCGAACAACGACGCAACTCAGGGCAAGATCAAGAAGATCGCACACCTGATCACCGTTGTTGAAGAATAAGGGGAGGTAGCAAGATGAAATTACATGAACTTTCTCCTGCTGAAGGCTCCAAAAAGAGTGTTAAGCGTATCGGTCGCGGTACTGCTTCCGGCCAGGGTAAAACCGCCGGTAAAGGCCAGAAGGGTCAGAAGGCCCGTTCCGGTTACAGCAGACGGCCCGGCTTTGAAGGTGGTCAGATGCCCCTTCAGCGCCGCGTGCCCAAAAGAGGTTTCAACAACATTTTTGCAACGGAGTACGCCATTGTCAATGTGTCTGATCTGAACGACAGATTTGAGGACGGCGCAACCGTGAACGCTGAGAGCCTGGTGGCCTCCGGTCTTTTGAAGAAGACCCTGGATGGTGTAAAGGTTCTGGGCAAGGGCGAGATTACTAAGGCTCTGACCGTTCAGGTCACCGCCATCAGTGAGAGCGCCAAATCTAAGATTGAGGCAGCAGGTGGCAAGGTGGAGGTGCTGTAAATGATCAAGACCTTCGTAAACGCTTGGAAAGTTGCGGACATCCGCAAAAAGCTTTTGTTTACAGCATTTGTTATCCTTGTTTTCCGAATTGGCTCTGTCATTCCTGTTCCTTTCCTGAACATTGTTGATGAGATCAATGTAGGTAAGGGCAACACCATTTTAACCTACCTGAGCTTGATGACCGGTAGTGCATTCACATACGGAACAATTTTCGCTATGTCCATCACACCGTACATCAATGCCTCCATTATTATGCAGCTTCTTGCTGTGGCCATTCCTGCGCTGGAGCGGCTGCAGAAGGAGGGCGAAGAAGGCAGAAAGAGGATCGCCACGATCACCCGTTTCGTTACGGTTGGTCTGGGCCTGTTGCAGTCCCTGGCATACTTCTTCTTCCTGCGTGCCAACGGCTATCTGATGAAGGATGCCAGCGGCGCAGCATTCACCGGCTTTGACGCCGTGTTCCAGGCAGTGGTCATTATTGCAGTGCTCACCGCCGGCACAGCCGTGATTATGTGGCTGGGCGAGCAGATCACCATTTCCGGTATCGGTAACGGTATTTCCATTATCCTTTTTGCCGGCATCGTGTCTCGTTTCCCCACCCTGATCAAGCAGCTGTTCCAGTACCTGGACACCGGCCGTACCGTATACAAAGTTCTGGTTCCCGTGGTGTGCGTGATCTTCCTTCTGATGATCGCTTACATCGTATTTATGGATAACTCGGAGCGCCGCCTGCCCATTCAGTACGCCAAGCGCGTTGTGGGCCGCAAAATGTACGGCGGTCAGTCCACCCACATGCCCATTAAGATCAATATGAGCGGCGTGCTGCCCATCATCTTTGCATCTTCTATTTTGTCCCTGCCCGGTACGGTGCAGATGTTCATTTCTGCTGACAAGTACAAGGGCACTGGCTGGGAGAAGTTCTTTAACGCCTTCCAGAGTGACTCTTGGTGGTATGCGGGTATGTACTTCCTGCTGATCATCTTCTTTGCCTATTTCTACAGCACCATTCAGTACAACCCGATTGAAATGGCAAATAATCTTCGTAAGAACAACGGCGCAATTCCCGGCATTCGTCCCGGCAAGCCCACTTCCGATTACATCATGCGGGTTCTGTCCCGTCTGACCTTGATCGGTTCTTTGATGCTTTGCGTAGTTGCCTTGTTCCCCATCGTGTACTCCTTGATTTGTAAGGCGGCGATTCCGCCCCTGGAGACCGGCGGTGACGACGGCGGCATGAGCATCACCCTGGGCGGTACATCCATCATCATTATGTGCGGTGTAGCTCTGGAGACGGTGCGTCAGCTGGAGAGCCAGTTGATGATGCGCCACTATAAAGGCTTCCTTGACTGATTATAAGGAGAACGCAAGATGAATTTGATCCTTCTTGGCGCGCCCGGTGCCGGCAAAGGCACCCAGGCGGAAAAGATTGTTGAAAAGTATGGTATTCCTGCCATCTCCACCGGTAACATCATCCGTGCTGCTCTGAAAGAGGGCACCGAGATGGGCCTGAAGGCCAAGTCCTATATGGACGCAGGCCAGTTGGTTCCGGACGATGTAGTTATCGGGATCATCAAGGACAGACTGGAACAAAAAGATTGCGAAAACGGATTTATTCTGGACGGATTTCCTCGTACCATTCCTCAAGCCCAGGCGCTTGAGGACATGGGCGTGGCTATTGATAAGGTCATTGATATAGAAGTCCCTGACGAGAAAATCACCGCCAGAATGTCCGGCCGCCGTGTATGTTCAAAGTGTGCAAATTCCTACCACATGCTTTATAAAAAGCCCAAGGTGGACGGTGTTTGTGACGCTTGCGGCGGTGCACTGATTCAACGCAAGGACGACGCGCCGGAGACGGTGCAGGCTCGCCTTGTGGAATACCACAAGATGACCGAGCCGCTGAAGGACTTTTATGACAAGCTGGGTAAGCTGGCAGTCGTAGAGGGTCAGGAAGAGGTGGCAGACACCACGGCACTCGTTTTTGCAGCACTGGAGGATTAACATGGTCGTGCTGAAAAGCAGCAGAGAACTGGAGCTGATGAAAGAGGCTTGCAAGATCTCCGCTGAAGCATTGATGGTAGCAGGTGAGGCTGTTAAGCCGGGCATCTCTACAAAGGAAATCGATAAGATCGCTTACGATCTGATCATCAAACGGGGTGCTAAGCCCAATTTCCTGCACTATGGGGGCTATCCCGCTACTGCATGTATATCCATAAATGATGAAGTGATCCACGGTATACCGAAAAAGGACCGCATCCTCCAAGAGGGTGACATTGTCAGCATCGACCTGGGTGCGGCCAAAAACGGTTACAACGGCGATAATGCTGCCACATTTGCAGTCGGGTCTTGCTCGCCCGAGGCAAAGCGGCTGATGGATACCACCCGCGAGAGCCTTTATAAAGGCATTGAGCAGGCGATACCCGGCAACAGGATCGGCGATATCGGCCACGCAGTACAAGCGTATTGCGAGGAACGCGGATACGGTGTTGTTCGTGACTTTGTGGGTCACGGCGTGGGCACCAAACTTCATGAAGACCCCAGCGTACCAAACTTCGGTCACGCAGGACGCGGTATCAGACTATTACCCGGAATGACATTGGCAATTGAACCAATGATAAATCTGGGGACCTATAAGGTAAAACAGCTTTCAGACGGTTGGACGGTCAAGACGGCAGACGGCAAGCTGGCTGCGCACTTTGAGCACACCATTGCCATTACCTCTAACGGTCCGGTCATTTTGACCAAAGTCTGAGGTGTTAATCAATTGCAGGCGATTACGCCGTAATGTGATTCCAGATAAGAGCGAACATCAATTCAAGATCCTATCCATAAGAGAGGTAAACGATGTCAAAGTCAGATATGATTGAAGTGGAAGGTACTGTGGTTGAGGCGCTGCCCAACACGACCTTTAAGGTAGCACTCCAAAATGACCACATCATTTTAGCCCATATCAGCGGTAAGCTGCGGATGAACAACATTCGTATTCTTCCCGGTGATAAGGTAACGATTGAGATGTCACCCTATGACCTGAATAAGGGTCGTATTATTTGGCGCTCAAAGTAAATAAAGGAGGATATTCAAATGAAAGTCAGACCTTCTGTAAAGAAAATTTGCGACAAATGCAAAGTGATTAAGCGCAATGGTAAAGTCATGGTTATCTGTGAAAATCCAAAGCACAAACAGCGTCAGGGCTAATCCTGAGCAATAATTCGGAGGTAAAACAATATGGCACGTATTTCTGGTGTTGACTTGCCCAACGACAAGAGAGTTGAGATCGGCCTTACTTACATCTATGGTATCGGCCGTACCACTGCTACTCAGATCGTAGAGGCAACCGGAATTGATCCCGATACTCGTTGCAGAGATCTTACCGAGGATCAGGTTTCCAAAATTCGTGATTACATTGAGAAGAACCTGAATGTTGAAGGTGATCTGCGCAGAGACAGAGCATTTGACATTAAGAGACTCATTGAAATTAACTGCTATCGCGGTATGCGCCATCGTCAGGGCCTGCCTGTAAGAGGACAGACCTCCAAGAACAACGCCCGCACCCGCAAAGGTCCCAAGAAGACCATAGCAAACAAGAAGAAATAAGCGTAGGAGGATATTCGTAGTATGGCTACAAAAAAGACCACTGGCTCTCGCAAACGCCGCGAGAAGAAGAATATTGAACGTGGTGCTGCCCATATTCAGTCAACCTTCAACAACACCATCGTAACCATCACGGACACGCAGGGCAATGCCGTTTCTTGGGCGTCTGCCGGCGAAATGGGTTTCCGTGGTTCCAAGAAGTCTACTCCCTTTGCTGCACAGACTGCTGCCGAGGTTGCTGCTAAGGCTGCTATGGAGCATGGTATGAAGACGGTGGAAGTTTTCGTTAAAGGCCCCGGCTCCGGCCGTGAAGCTGCCATCCGCGCACTTCAGACTGCCGGTCTGGATGTAACCCTGATTAAGGATGTTACCCCCATTCCGCACAACGGCTGCCGTCCGCCTAAGAGACGTCGTGTATAATCTAACGGAGGTGTAGAAGATATGGCAAAGAATTCAGAGCCCATCGCAAAGCGCTGCAAAGCACTCGGCATTTCTCCGGCTGTTATGGGCTATACAAATAAGGATACATTCAGAAATTCTTATACCAAGAATCGCCGCAAGAAGAGCGAGTATGCTATGCAGCTGCAGGAAAAGCAGAAAGTGAAGTTCATCTACGGCATTCTGGAGAAGCAGTTCCATTCTTACTATGAGAAGGCAGCTAAGGCTCCCGGCCAGACCGGTGCCGTGCTGCTGACCATGGTAGAGACTCGTTTGGACAATGTGGCTTTCCGCACCGGTTTTTGCAAGACCCGTCGTGAGGCTCGCCAGGCTGTTTCTCACGGTCACTTCACCGTGAACGGCAAAAAGGTCAACATTCCCTCCTACCTTGTGAAGGCCGGCGATGTGATCGCTGTGGTGGATAAGAGCAAGGAGAACGGCAGATTTAAGCTCGTGAAGGAAGAGGGCGTTTATGGCAACGCTCCCAAGTGGCTGGAGGTTGACGCAGAGAAGCTGACCGCTAAGGTTGTGGCTCTGCCCACCCGTGAAGACATTGATTATCCTGTTGAAGAGCACTTGATCGTTGAGTTCTATTCTAGATAATAGTTGATCATTCTGTTATTTAGCTGTTAAAATCAAAATAGGAGGCTTTTAAATGATTGAAATTGATAAGCCGAAAATCGAGATTGTAGATTTATCTACTCAGGGAAGCAGAAGCGTGGGTAAGTTTGTGGTGGAACCTCTGGAAAGAGGTTTCGGCGCAACCCTGGGCAACGGTATGCGGAGAGTGCTGCTCTCCTCTCTGCCCGGCTATGCCATCACTTCCGTGAAGATTGATGGTGTGCTGCACGAGTTTTCTACCATTCCGCATGTAAAGGAAGATGTGACGGAGATCGTTTTGAATCTCAAAAACGTTATCCTGAAGATTCACGATGAGCAGCCGAAGATGCTGCACATTGAGGCCAGCGGAGAAGGCGAGATCACTGCGGGCGATATTATTCATGACGCAGATGTAGAGATCCTGAATCCCGAGCTGCACATTGCTTATCTGGACGCCGGCGCCAGCGTATCTATGGAGCTGACGGCAGACAGCGGCCGCGGCTATGTGCCCTGTGACCGCAACAAGCAGCTGATGGATTTGCCCATCGGCACCATTGCAATCGACTCTATCTACACCCCGGTGCTCAAGGTGAACTACACCGTAGAGAACACCCGTGTAGGTCAGCAGACAGACCTTGATAAACTGATTCTTGATGTTGAGACGGACGGCACCATTCCGGCTGACGAGGCCGCTTCTTTGGCTGCTAAGATTCTCAACGACCACCTGATGCTGTTTGTGGATCTCTCTGAGGAGATCGGCAACCAGGATATTATGGTGGAGAAGGATGACGACGGCAAGGAGAAGGTTCTGGAGATGACCATTGAGGAACTGGATCTGTCCGTGCGCTCTTTCAACTGTCTCAAGCGAGCAGGCATTAACACAGTAGAGGATTTGATCAGCAAATCCGAAGAAGATATGATGAAGGTTAGAAACCTGGGCCGCAAGTCCCTGGACGAGGTGGTTGCCAAGCTGCAATCCCTGGGCTTCAGCCTGAGTCACGATGAGGATTAAAGGAGGGAATTTCAATGCCAGGTTCCAGAAAATTGGGCAGACCTACTGACCACAGAAAAGCAATGCTCAGAGGTATGGTTACTTTTCTTTTAGAAAACGGCAAGATTGAAACTACCGTTACCAGAGCGAAAGAAGTTCGCGCTATGGCTGAGAAGATGATCACTCTCGGCAAGAAGAACACTTTGGCTTCCAAAAGACAGGTGCTTTCCTATGTTACCAAGGAAGATGTTGTAAAGAAGTTGTTTGATGAGATCGCGCCCAAGTACGAGGACAGAAACGGCGGTTACACCCGCATTGTAAAGACTGGCCCCCGTCGCGGCGACGCAGCTGAGATGTGCATCATCGAGCTTGTATAAGCGCAGGTCATTATGACGGTTATAGGCGTATGTACTCCGGTACATACGCCTTTTTTCATGGTCGTGGCGTTTATTATAAAAATCACCAAAGTGTGCAGACAGTTTGCCCCCGGCAGCCGTCTTATAGAGTGTACACACAATGAGAAACGCTTTGACCAGCAGAAAGGAAATGTACGATGTTCGGTAAAAAGAAAATTGAGGCCGTGTCCGTATTAGATCTGCGCAACTATACGCCCCAGGCGCTGCGCAAGATCAGCTCTATTCAAGCGGTAAGCACCATCTTGCTGCCGGAGAATCCTTCGCCGGCATTCGCAGAGGCCTATGCGGATATAACCAAGGGGGCCATTGCCCAGGAGGTGTTTGCGCCTATGGACAAAGTGACCCAGTATAACGGACTGAATGTGCTGGGGTCTACGCTGCCGGAGGGCGCCATTTGCCTTTGTAACGGTATGACCATCTTTCGGCGGGCAGCCGGGGAGAAGCACGCCCGGGTCTTTCTAAGCGGTATAGGCGTTGCAGAGCAGGGCACCGGTCTGGTGATTGAGAACCTGAACGGTATGTTCCGGGAATTGGATCGGGATCTGGACCATTTGCACCAGTTCTCCGCAGAGCTGCGGGCAGGTGCGGATTTGCTGTCCCGGTTGGAGGACGGCGCGGTGATCGTGGTGGGTAGCAGCCTGTTTTTTGCGCCGGATGTGACCCCGGAGATGATCACGGATAAGCACCTGTTGTTTATCGTAGGTGCAGTTGCCGTATGTCCCAAGCCGCTGCTGGGCGTGGTGCAGGCCAACAGCATAGTAGGCAATATGGTCATGGACGAAGAAGCGTATGAAGCATTCCGAAAAAAATACAAAGTATGAGCACTTTAATGCTGTTTATGCTGGATCTTATGCTGCGGTGCTGCGTTGGATTCGCGGTCGTGTGCCTGCTGATTTGGCCGAGGAGCTGACCCAGCAGACCTTTATGCAGTATTGGCAGTGGCTGCTGGCGGCGGCTGCTTTCCCCAAGTCGGACAAAAGCCTGCTGCTGTCCATTGCCCGCAGCGTGTGCGCCGACCACTACCGGGCCATTGCTGCCCGGGCGGTGTGCGTGGCAATACCGGAGGACTTTGACCTGCCGGATCGGTCGGATCCCATCACCATGGTAGAGTGGGCGCAGGTGCTGGGTATGCTGGGGCGAGGGGATCAGATTTTGCTCGCTATGCGGCGCCAGGGCTACGGTAGTAAAGAGATCGGTCTGGCACTGGGTATTTCCGGCTCTGCGGTGCGTACCCGGTTGCAAAAGGTGCGCAAGCTGCTGCGTAAGGTGCTGGCGGACTGACGGTTGCACTGGCGGCAGGCTTATGGTATAATGACAACAGAATATGTGAGGTGGTATCCTGATGAAAAAGTACAGTGTGATCTTTTGTTTCCTGCTGGCAACTGTGTTTGTTGGGATGCCATCTTTTTTTGCCTTTGCCGGGGAGCAGGGGACTTTAGGTGATAGTCAGGTGGATTATGTGTTTGAGGAGCGTACCGGCACCTTGACCCTTACCGGCACCGGTGCTACGCCGGATTACACCCCGGAGAGTCTGCCGCCCTTTGCCGCCTACCGCAGTCAAATTCGCACGGTGCAAGTGGAGGAGGGCATTACCGACCTGGGAGACAATCTGCTTCGCCAGTTGACGGCTGTTATGGATGTGCAGTTGCCGGACAGCTTGAGAACCATTGGCAGCAACACCTTTTTCCATGTTGCAGCCTTGCAGTCGATACGAATTCCTGCCGGGGTCACGGGTATTGGCAGCTATGCCTTTGCCGCTTGCTCCGGGCTGACGGATATTCAGTTTGACAATATGGCTGGCAGTTTGCAGCTGGGCGCCTGTGCCTTTATTGACTGCAAGGCGCTGACCGCTGCGCAGTTCCCGGTGGGCACCGGCTTTGGTCAGTACGCGGTTGGGTACCAGGACGAGGACGGCCGCCCCATGACTGCCTTTACCCTGCGGGGACTGACCGGCACCACTGCCCAGTATTATGCGGACGCAGCGGCACAGATTACCTTTGATCCGGCGCTGGAGTTGACCCAAGGCACCACCTTTGGCAACACATTTCAATCCTACAACGGTACAGACTGGTATCGCTACACCCCTACTGCTACCGGTACTTACCATTTTTACTCCATGGGCAGTGTGGACACGGTGGTGCGCCTATGCGACGGCAGCAAGGCGGACCTGGGGCAAGGCAGCGACGACCGTTCCCTTTATGACCTGAATTTTGATCTCACCTGTACTTTGCAGGCAGGGAAGACCTATTATTTTCAAGTGACCAATAACCGCAGCCTGGGGGCATACACGGCGTATCTGTATCCGGGTAAAGTGACCGGTTTTTCTGCCGCATTTCCGGCAGATCAGGTGCTGGTCACCGGTGTGGATAGCACGGCGCGCACGGACAGCGATGGGCAGACCTATGCTTACTTTGACCTGAACGCCTTTACCGATCGGTTGCAAATTACCATCACTTATGATACCGGCGACCAGGTGACCCTGCCGCTGACAGAGGAAAACTATAACGGCCATGTCTTTTCTTTGACGGACGATCAGGTTGCCCATCACTGGACAGAGGGTACGTACACCGCCACGCTGACCTGGGGGGACCAAACGGCTGCTGTGCCGGTGCATGTACACACCCATGTGTACACCGCCCAACGCACAGAACCCACTTGCGTGGCAGACGGCCAAATTCTTTACACCTGCACTTGCGGTGACAGCTATGCCACCCCGATTGCCAAACTGGGGCATACGGCGCCTGCCACCCACCGTGTGCAGCCCACATGCACCCTGCCGGGTTATACTTATGATTATTGCACCCGGTGCAGAGCGCATTTGTCCGACACCGTCAGTACCCCGGCGTTGGGGCACGATTATACCGCCGTGGTGATCCCGCCGACGACAACGGAGGGGGGCTACACCCGCTACACCTGCCGGCGCTGCGGCAGCAGCTATGATGCGAATTATCAACCGGCGCTTAGCTACACTGTTACCGGGCGTGCGGTGGCAATGGAGAGCACGGACGGCAGTCACCCCCACAATTATCTGCTGGTGGGCACGACGATAGAGTGGAACGATGAGAGCGTGCAAACCGATGAAAATGGCACATTTTCCATTGCCGTGGCACCGGGTACTTACACCGTGACCGTGGGGGCGGATTTTTACTTATGCCGCCAGGTGCAGGTAACGGTCACTACACAGAGCGTAGACTTGGGCGATGTGCCGGTGATGGCCTATGATTTGACCGGCGATGGGTATGTGAACGCCCGGGATCTGGTGACTTTACAGCAGTACGCAGCCGCCATTGACAGAGGCGAGGGCGCATATGAACGGTTGCTGGACTTTAACGGAGACGGGCGAATTACCGCTGCGGATATGGACGGCGCAGTCGGTTTTATCGGTGCCGGTAAGCTGGACGAAAGCATTTACGATTAACAGAGAAAACCAACCTGTGGAATCACGGGTTGGTTTTTGTATTTTTCTATTGAAAAAGCACCGCATATAGCGTATAATAGCCGTAATATAAACGAAAAAATACTTGCCATACCCGGTGTCGCGCCCGGTGCGCCACCGCAAACGGAGGACAGTTTTATGAAAAAAGTTGCAGTCATTATGGGCTCGGACAGCGATCTGCCGGTGGTGGCACCGGCCATTAAGCAGCTGCGGGAGCTGAGCATTGAGACCGAGGTGCATGTAATGAGCGCCCACCGTACCCCCAAGGAGGCTATGGCCTTTGCAGAGAGTGCCCGGGAGAACGGCTTTGGCGTGATCCTGGCAGCCGCCGGTATGGCGGCGCACCTGGGCGGCGTGTTGGCCGCTTCCACCACGCTGCCGGTGATCGGTATTCCGTGCAGCGCCAAGGTGCTGGACGGTATGGACGCCATGCTGGCTACGGTGATGATGCCCCCGGGTATCCCGGTGGCTACCGTTGGGGTCAATGCGGCTAAGAACGCAGCGCTGCTGGCAGCGGAGATCCTGGCTGTTGGCAATGACGACTTAATGGACAAACTGGTGCAAATGCGGGCGGATATGGCCGCTGCCGTGCGCCAAAAAGATACAGACCTGCAAAAGAAACTGGAGGAGATCTGAGTATGGAAAAGAGTTTTAGCGCAAGCTATGCGGCAGCCGGTGTAGATGTGACTGCCGGTTATGAGTCTGTGGAGCGGATTAAGGCCCATGTAAAGCGCACCATCGTGCCCGGCGTGCTGGGTGGGATCGGCGGCTTTGGCGGTATGTTTCAACTGCCGGTGAACGACTATAAGGAGCCGGTGTTGGTCAGCGGTACAGACGGTGTAGGCACCAAGCTGAAGATCGCCTTTTTAATGGATAAGCACGACACTGTAGGTATCGACTGTGTGGCTATGTGCGTCAACGATGTGGCTTGCTCCGGTGCCAAGCCCCTGTTCTTCCTGGATTATATCGCCTGCGGCAAAAACTTCCCGGAGAAGATTGAGCAGATCGTGGCCGGTGTGGCTGAGGGCTGTGTGCAGGCCGGCTGCGCTCTGGTTGGCGGCGAGACTGCGGAGATGCCAGGCTTTTATCCGGAGGATGAGTACGACCTGGCCGGGTTCTCCGTTGGCGTTGGCGAAAAGAGCAAATTGGTCAGCGGTGAGGAACTGAAAGTCGGAGACGCGCTTATCGGCGTGGCCTCCTCCGGCGTACATTCTAATGGCTTCTCTTTGGTGCGCAAGGTGTTTAACATTTCTTCCCAGCGGCTGCATGTGCAGGTGCCGGAGCTGGGCAAGAGCCTGGGTGAGGAGTTGCTGACGCCCACCCGCATTTATGTAAAGCCCCTGCTGGCACTGATGGACAGCGTGCGGGTGCACGCCATCAGCCACATTACCGGCGGCGGGTTCTATGAGAATGTGCCCCGTCTGCTGCAAGACG
>Bengtsson-PalmeJ_2015__TRAVELRES9_NODE_4_length_538580_cov_9.43148
AATTTTCAAGGTCCTTATCCAGCCTTTCGGCCGGCCGCTCTTCTCTCGAGCGCTTGATAACTATACCACAACTTGCCGCAAATGTCAACATCTTTATTCAAGTTTTTCATTTTTTTAACAGCAGCGGGATCGAAACAATCAAGTGTCCGCGCCTTGCTGTCGGCTGCGCTGCGGTTAAGCAACGTGTGATATTATAGCGCGCCGATCAGCAAATGTCAAGACCCAATTTCAACTTTTTTATCGGGTTGCAATTCCGTGCACAATTTGCTATAATGGCTAAACGATATATATAATGTATAAGGAGGGATCTGCAATGCCCATTCGTATTGATAACGAATTGCCGGCGAAGCAAAGCTTGGAAATCGAGAATATCTTTGTCATGAACAACAAGCGCGCGGACACGCAAGACATCCGCCCCCTGCATATCATTATATTAAATTTGATGCCCACCAAGATCGACACGGAGACCCAGCTGCTGCGTCTGCTGAGCAACACGCCGCTGCAAGTGAATGTGGACTTTCTGCAAGTGAGCAGTCATACAGCCAAGCATACCTCTAAAAGTCACATGGACAAGTTCTACTACACCTTTGATCAGATAAAGGACAGAAAATACGACGGTATGATCATCACCGGTGCACCGGTGGAGCAAATGCCCTTTGAGGAAGTGGACTACTGGGACGAGCTTTGCCGGATCATGGATTGGACAAAGACCAATGTATATAGCACCTTCCATATTTGCTGGGGCGCGCAAGCGGGGCTGTACTACCACTACGGTATTCCAAAGCACCCGCTCAGTAAAAAGATGTTCGGCGTATTCCCCCACCGCAGTTTAGATGTGACCCATCCACTGATGCGGGGACTGGACGATGTGTTTTACATTCCCCACTCCCGGCATACGGAAATTCTGCGGCAAGACATTGCCCAGGTAAAGGACTTGCAGATCCTGGCATACAGTGATATTGCCGGTGTCTGCCTGCTGTCTGATATGGAGTGCCGCAACTTCTTCTCTACCGGGCACAGTGAATACGACCGAGATACACTGGCCAAAGAATATTTTCGTGACAAGAGCAAAGGACTGGACATTGACAGACCCTACAACTACTTTCCCCACGATGATGAGAACCTGGTGCCCTTGGTCAGCTGGAAAAGTACAGCCAGCCTGATTTTTTCTAACTGGCTCAACTATTTCGTTTACCAACGCACACCCTACGACATCAGCACACTATAACATAAGTAACAAAGGCCGCTGTGGAAAACACAGCGGTCTTTTTCTATGATTAATATTATCTTTAGAATAGAAAACGCATAGAAAAACAGCCCACCTGAAAAAGGTGGGCTGTATGTAATTACTTAAACAGGTAATTGGTGTTGTTAAAGGTCAGCGGCTGGTACTCGCCATTATGCGCATAGTACACAGCAGACAACTTAACAGCCACAGCAAAAGTCTTGCCGGAGCAGCTAAACACATAGCAATCTGCGCCGTTAACAGTAACTACCTTATTGTTGTAAGAGATAGAACTGCTGGACGGATCCGCACTGTAGCCAACCTCCTGCCAGTTATCGTGAATGGTCTGCTTGAGCAGCAGCTTCGCATCCGCAATGCTGTAATCCGGTGTGGTTGTGATCTTATGCGGGTTGGAATACGCATCGTAAGTCTGAGCCACTTTTGTTCCCTCTTCCGCAGCCGTCGTTTCCTGGGCGGGATTGTAAACAAACGCGCCAAAACGAACGATAAAGTAGATCAGGAACCAAATGAGCAGGATCAGGATCACAATCAGAGCGATCTTGCCGCCCTTGTTCTCCGGTTTCGCCGCCATCTCGTCCTGAGACGGTGTGGGGATCGGAACGAAAGGTTTACCCTTCTTAGCGCACTTCTTTTCCAGCTTAGCATTCTTCTTGTCGATCTTCTTGACCAACTTAGCGTATGCCTTCTGTCCGGCCTTCTCTGCTTTGATCTCTCCCTTAGTCTGGAAAGCATCGATGGTCGGAATGGCAATGGCGGTAAATGCTTTGCCGCCTGCGGCCGCTTTCTTTTCCCCTTTTTCGTTTTTCTTCGTAGTTTCTTTTACGAATTTTTCATAAGCCTTTGCATGCTTCTTTTCCGCTTTGGCGTTTGCCTTAGCAAGTGCCTTTTCAGCCTTTGCTTCTCTCTTGGCCGCCTTCGCTTCTTTCTTAGCAAGCTTCTTTTCTTTACTCAAGGCAGTACCCTCCTTATAAGTATAGTAGTAGTATATCATCTTGCTGCTCAAATTTCAACAAAAAAATGCAAGCAAATGCGAGATTTTTATGAACAAACTGTAAACATTAGTACGCCGGCAGCATACAGTACACAAGATTTGGTAGTGAGCAGCGGTGCATTATGCCTATATATGATCCGGATAGCGGTGCGCGGTAATGGTGCCGTCCTTCACTTCCAATCGGCAAATGCGGGCGTTGCGGCGGTCGCCTTCAAAGCCGTCATCCTCCACATTACGGGCGTGGTACACCGCGTACCATACGCCATCCTTCTTGATCACGCTGTGATGACCGGTGCCCTCCTCCCAATCGTTGGCGCGAATCACCGGAGCATAGGTATGGTCATCCGGCACCTTTTCAAACTTGATTTTAGTCAGGTCCGTTTCGTCCGTCTTGGCTCGGGCGTATCCTATATAATAGGTAGGCTGTAAGTAGCAGTTGCCGCTGTACATTACATACTGCCAGTCTCCCTCCCGAAAGTAGCAGGCGCCCTCAATAGTGTGCCAGTGCTGGCCCGTCTTGTACCGATCCCGACGGAAGATCTCCTCGTCCAGGGTGGGCACCACCACCGGCACCGGGTGTCCTGCCGGGGTGTACGGATCCAGCATCTTATCCACCACAATATAAGTGCCGATCCGGTCGCCCTCAAACGTATTGGTAGAATAGAACAAATACAGACCGCTCTCGTTCTGCACAATCTGGGAGTCAATGGAAAAGGGATGCAAAATCTGCTTCTCCTGCCCAAAGGGACCGAGGGGATTATCCGCCTGACTGACAAACAGCGCCTCCCGATGACCGCCCTGATCCGGGGTATCACCAAAGAACTCATAAGAACAATACATATAATAAGTACCATCCAGTTCAATAACGCTGGGTGCCCAGAAGCTATGCTCCCCAGGCACGGTAAACACCATACCGTGAAATTGCCAACCGGTGAGCAGATCATCCGAGCTGTAAGCGTAAATGCCATCATCGCCGGTGGTATAAATGTAATATCGACCGCTGCTTTCCAGAATAAACGGATCTGCCTGACCGATATAATTCTCTTTTTTTGTTTCTAACAGCTGCATAAGTGCGCTCCTTCTTCAAAAATCAGCATCATTATACACGCTGGCGCGGCCTTTGCCTACCGATATGGACCAAATTCTTAAAATTCAGTACAGTGCACAAAGAAGTGCCAAAGAATTTGTGCAATAGGGCAGGAATCAGGCGGAATTTTGCCGTGGAATTGCAAAATGTCAACTTATTTTACGATTTTGGTTGACATTTACGCAAAATCAAGGCATAATAGTACAAAATTCAATGTGAGGTAAAAAGTATGTCAGAAACAACCGCAGCTGCCGAAAGCAGCAAGAAGAAGAAAAAACTCCGCACGGTAGACATTGCCTATATCGGTCTGTTTGCCGCACTGATCGCTGTGTGTGCCCAGATCGCCGTGCCCATGACCGTGTCCTTTACCATGCAGACCTTTGCCGTTTGCCTGTGCGCCGGACTGCTGGGGTGGAAGCGCTCCACCGTATCCGTGATCGTGTACATTCTGCTGGGTATGGTAGGACTGCCCATCTTTACCGGGTTCAAAAGCGGCGTGGCAGCCATTACCGGTCCCACCGGCGGCTACATTGTCGGCTTTGTCCTGACCGCACTGATCACCGGCGCTTTGGTGCAAAAGTTCGGTCACAAGTTTTGGCAGTTGATCCTGTTTATGGTGATCGGCCTGACTGTGTGCTACGCCTTTGGCACTGTGTGGTTCATCATTGCTTACAAAGCCACATTAAAAGCGGCGCTGGCCACCTGCGTGGTACCATTCCTGCTGCCGGAGTGTGGCAAGATCCTGCTGGCAGCCCTACTCACCAATCGGCTGATCCGCTTTGTAAAATAAATCTTAAACGACACAAAACAACGCAAGGTGCGAAATACACCTTGCGTTTTTTATTATCTTATACTGCATAAAGCATTTGCAACAGACGTTTTCCCGTCCCAGTGGTGAACAGCTTTTCTCTGCCGACTTGCACGGCTTCTTCTGAAAGCCCCTCCTCATACGCATTCACCAAAAAGTCCGCCTCCATTAAAATGCGCAAAGTCAATCGGTCCACACCGGTGTAGGTATGGTGTCTGGCCAACAGATCACAAACTTCTTCCACAAAATCCTTTGGCCAGTCTGCAAGCAGTTGGCATACCACCGGCGGGCCCTCCAGCTCTTGGTATTTACCGGCAGAGGAACCGTAATGCAGTTCCGCGTTGTGAATACCAATATCATGAAGTGCAGCGGCTGTCAGCAATACGCGCCGCTGCCCGTCGCACAAATGCTCCCCATCGGCGATCATTTCGGCAAAAGCATACACCTTGATCAAATGCTGTATCCGCTTGGGATCTCCGGCATCATATTGCAGGGCACGGCGCAACGCTTCTCTCGGATCGTTCAAAGGGCTCATTTCTCTGCCTTTACCGCGTCATACTGCTCCAGCACCTCTTTGTCCGGCGCAGGGGTGCACAGGGACACCACCACATTCACCAGCAGACCAAACAGGAACGCAGGCAGCAGCTCGTAAATCTTCAAAACCGGTGCCAGGTCGGCAATGCAATACTTCCACAGGAACACCATTACCGCGCCGGCGATCATACCGGCCACAGCGCCGTAACGGTTGGAGCGCCGCCAAAACAGCGCCAGCAGCATTACCGGACCAAAGGACGCGCCAAAGCCCGCCCAAGCAAAGCTGACGATCTTAAACACAGAAGCATTAGAATCCCAAGCCATAAAGATGCCTACCACGGCAATACCCAGCAGGGTCACCCGAGCCACGATCATCTTAGCCTTGGCAGACAAATTCAGGTTGAACAGGCTGCCCAAAATATTCTCGCTGACGCCGGAGGAGGCAGCCAGCAGCTGGCTGTCCGCCGTGGACATGGTGCTGGCCAAAATACCCGCCAGGATCACACCGGCCAGCAGTGCAGCAACTACCCCGTGCTGGGACAGCAGATTGGCGATCTGCACAATAATGGTTTCCTTGTCTGCCAGCGCACCCATAGCGCCGTTCTTGACCATAGCGGAGCCAACTACGCCGATCACCACGGCAATGAACATAGAGATCACGACCCAAATGGTGGCAATGCGGCGAGAGGTCTTTAATTTGCGATCATCTTCAATGGCCATAAACCGCAGCAGAATGTGGGGCATACCAAAGTAGCCCAGCCCCCAGGCGGCGGTAGACAAAATTTTCAACAAGTTGTACGTGGCGGACTTGCCGCTTTCCGGGTCATAGGTAGCCGTCATGGACAGATAGCCGCTCATGCTCTGCGCATTCTCCACCACGGCGCCCACGCCGCCGGCCTTGGACACGCCAAACACCAGCACCACCACCAGCGCAATGCTCATCACAATGCTCTGCACTAAGTCAGTGGTAGACGCGGCAGTAAACCCGCCGGTAGCGGTATAGCCCACGATCACAATGGCGGAAACAATCATTGCCACATGGTAGTCCATACCGAACAGCGTGCCAAACAGCTTGCCGCAGGCGGCAAAGCCGGAGGCTGTGTACGGCACAAAGAATACAATAATTAAAATAGCTGCCATGGCGGTAAGAATATGTTTTTTCTCTCCAAATCGGCGAGAGAAAAAGTCCGGCACGGTAATGGCGCCAATGCGGGCGGAATACCGGCGCAGACGGCGTGCCACCACCAGCCAGTTAATGTAAGTGCCCACACCGAGGCCAATGGCTGTCCATCCCGGATCCGCAATACCGGTCAGATAGGCAACGCCCGGCAGGCCCATCAGCAGCCAGCTGGACATATCCGACGCCTCGGCACTCATGGCAGTAACCACCGGCCCCAACCGACGGCCGCCCAAATAGAAATCGTCCACTGTATTGTTGCGTTTGGAGCACACAATACCAATAGCCAGCATAGCGATCAGGTACACGGCTATAGAGATCAGAATACAAACTTGTGCACTGGTCATAAACAGTACCTCCAACAAAATTTGGCGCTTTGCAGCACTACCGGTGCAAAGCAATACAATCTATAGTACCATTTTTTGGCGCCGATGTAAAGAATAAGTTGCGTTTTTTCCTTTGATTAGCGCCTATATCCGGCAGGGATAAAAGAATTGACAAGCCGTAGGCAGGTTGTTACAATAAAATTGTATAAAGCTTATATTCCACAAGGAGACGGAAAAAATGAAGCAATCGGCAATGTCGCCCCGCACCGGGCGTATAATAGAACTGGATATTGCCAAAGGGTTGGGCATTCTCTCGGTGATCCTGTACAACACCCTACCCGCCTCGCCTTTGCATACAGCGCTGGGCGGCTATATGATGCCCCTGTTTTTTGTGGTATCCGGGCTGGTCATGCAAAGGGATGCATGCATCTTTTCTCTCCGTCGTTTTTGGGAGAAGAACGCCCGGCTGCTGTTTTATTACATTTTATTCAGCGCCATTTATCTGCTGTGTAGCGCAGTGACCTGTATTGCAGGCCACGGCAGCTACAAGGCGCTGGCACTGGACGGCATTGCCGCTTTGATCGGGTGCGGATTTAATGTACTTTGGTTTTTAACCACCCTGTTTTTGGGCAAACTGCTTTGCAGTCTGCTCACCGGCAGTACACTGCCCCGCTGGGCACAAGGGTTGTTCCTGGCCGGGCTGTTTTTGCTGGCAGCCGGTATAGGCAGAGCAGTGAACTTTACCGCCCTGACCGGCGTAGGCCGGGTGCTGGGCATGGTAGGGCTGACAGTTTTTCGCCCCATGGAGGCGGCCTTTTATCTGTTTATTGGCACCCTGCTGCAAGGTGCGTTTCGTTCTTTGCAAAAGCAGTGTACCAAGCCGGCGATGGTTGTCGCCTGCGGCATTGGCGGCACTGTGCTGACCGTCGGCTGTGGCTTGCTGGCGCAGGCAGCGCCACAGGATATGTACGATTTGACCGCCTCTCTCCCGCTGCTGAGTTTGGCGGCGGCTGCACTGGGCTGCGCCGGAATCCTCGGTATCAGCCTGGCGCTGGCCAAGGTGCCTATGCTGAACAAAGGTCTCGCCTACTTGGGCGTACACGCTCTGTACCTGATGGCCATTCACAACCAGCCCAATTTATATGGCTGGCTCAACAAGCTATCTGTCAAGCTGTGCGCCGGGTTGCCCGGCTGGTATATGCAGGGCATGTTCTTTCTCCTGCTCACCGTGGCGGCGCTGATAATCGCCATGGGACTGGAGCCGCGACTGGAGCCGGCAGTGCGCGCCTTGGCTCGCCGCTGCACCGGACAGAGAAAAGAGCAGACAAACCCGGAGCGCTCTTGACTTTTCGGTCCCGATTTGCTATGATACCAAGGTAACAGCAAGGACGAGAAACAGTACTCCCCCACCCTGTGCAGAGAGAACAGGCGGTCGGTGCAAGCCTGGGCAGGCGGCGGAGGAACCCATCTTTGAGCTGTGCGCCGAACGCAAAGGCTATTAAGGCGTACCGGGAGCTCCCGTTACAGAGCGCGCAGAGTGCAGGCTCAGCCTGAATTTAGGTGGTAACACGGATCAATGATTCGCCCTAAACCGATCGTCACAGATCGGCTTAGGGCTTTATTTTTTGGAGGTTTTTTGTATGAAACTGGAACACTTAGTTGGCGATCGCTTTAAGGAGCGCCCGGCAGACTGCCAGGTAGACAGCCACGCCCTGATGGTGCGCGGCGGCTACATCAAGTATGTGGCAAACGGCATTTACTCCTCTTACCCGCCCTTAAAACGGGTGCTGAAGAAGCTGGAGCAAATCATGCGGGAAGAGATGGACGCCCTGGACGGTCAGGAAGTGCAGTTCCCGGTGGTGATGCCCGCCTCTCTGTGGGCAGAGTCCGGCCGGTATGAGAGTATCGGCAAAGAGTTGCTGCGCTTTACGGACCGCAACGGTGCCGATATGGTGCTGGGTATGACCCACGAGGAGGCTGCGGTGCAACTGGTGCGAGAATACGCCGGCACCTACACCAAGTACCCCTTTATGATCTATCAAATTCAAACCAAGTTCCGGGACGAGGCGCGCCCCAGAGCCGGGCTGATCCGTGTGCGTGAGTTCACTATGAAGGACGCTTACTCCTTCCACACCAGCCAGGAGGACCTGGACGATTATTACGAAAAGTGCCACAAGGCTTATGAGCGCATTTTTGCCCGCGCCGGTGTGCCGGAGGTGATCTCCGTTGCTTCAGACTCCGGTATGATGGGCGGCAGCGTATCCCACGAATTTATGCTGCTGACCCCCATTGGCGAGGACTCTATCGTGCTGTGCGACGACTGCGGATATATGGCCAACATGGAGGCTGCCGAGTCTATCCTGGAGCCGGTGGAAAATGCCCCCTCCCAGCCGCTGACTAAGGTGCACACCCCGGGTATGCACACCATTGAGGAGGTATGCACCTATCTGCACGCCGACCCTAAGGACAGTGCCAAGGCCGTGGTGTACCAGACCAATAATGAAGACAAATATGTGGTACTGTTCCTGCGAGGCGACCTAGAAGTGAACGAGACCAAGCTCACCAACTTTTTGGGTGAGGAAATTCACCCGGCAGTAATTACCGAAGAATGTGGTCTGCACGCCGGCTTTATCGGCCCTGCCAATCTAAACGGCGACTTTACCGTGCTATACGACCGCTCTCTGGAGGGGCGCAACAACCTGTGTGCCGGTGCCAACGAGACGGATTACCACTATACCGGCGTGGATATGCAGCGGGATGTGCCCGGTGCGGAGTACCACGATTTTGCCAAGGTGGTTGAGGGCGGTATCTGCCCCTGCTGCGGCAAAAAGAGCATTCATATTTCCCGGGGTATTGAGGTGGGCAACATTTTCCAGCTGGGCAAGAAGTACACCGAGCCTATGGGCATGACCTATACGGATCGGGACGGCAAGAGCCGTGTGCCGATCATGGGCTGCTACGGCATTGGCGTTGGCCGACTGGCCGCCGCTGTGTGCGAGGCGCACCACGACGACTACGGTCCCATTTGGCCCAAGGCCATTGCCCCCTGGCAGGTGCACCTGTGCGCTGTGCGTGCAGACAATGAAGAAGTGCGCGCCTTTGCCGATACACTGTACAACACCTTGCAGGAGAAGGGCGTAGAAGTGATCTACGATGACCGTTCTGTCAGCGCCGGCGTTATGTTCTCCGACGCAGATCTGCTGGGCGTGCCCCTGCGCGTGATCGTCAGCCCCCGGAACCTGAAAAACGGCGTGGTGGAGCTAACCGCCCGGGACAAGAGTTTCTCTGAGACCGCACCCACCGCAGAAGCGGCAGACGCCATTTTGGCCAAGCTGGCAGAATGAGCGTAACGAACCGGCCGATACGCATTTTGTTCGTGTGCCACGGCAACATTTGCCGCTCGCCTATGGCGGAATTCATCTTTAAGGATATGGTGCGGCAGGTGGGACTGGCAGATCAATTTGAGATTGCGTCCGCTGCCACCAGCCGAGAAGAGATATGGCACGGCAAAGGCAATCCGGTGTACCCGCCTGCCAAGGCAGAGTTGGCTGCCCACGGCTTGTCCTGTGACGGCAAGCGCGCCCGACAGCTGACTGTCGCCGATTATGACTACTACGATCTGCTGCTGGCCATGGATGGCAGCAATGTGCGTAATCTGCACCGTATGCTGGGCGGCGACCCACAGCATAAGATCAAAAAGCTGCTGGACTATGCCCACGGCGGCGATGTGGCCGACCCTTGGTACAGCCGGGATTTCACCCGCGCCTACCAGGATATCGCCACCGGCTGCCGCGCCCTGCTTACCGCCCTTACAACCAAATAAAAAAGCGTCCCGGCACAAAGGCAATGCGACTTTGTACCGGGGTATTTTTATCGGCTTATTGGTCAAACGACGGATTGGTCATATAGTAATTTTTGCTGTTCAGCTTATCGGTGGCTACCCGCAGTCCCTCACCGAAGCGCTGATAATGGACGATCTCCCGCTCCCGCAGGAACTTGATTGGCTGGATAATATCCGGATCGTCTACCATGCGCAGAATGTTGTCATAGGTGACCCGCGCCTTTTGCTCCGCCGCCAGATCCTCGTTCAGATCGGCAATGGTGTCGCCCTTTACGCCGATACTCGCTGCGTTCCAAGGGGAGCCACTGGCAGAGGTTGGATACACACCGGCGGTGTGATCCACAAAGTAGGCGGCAAATCCGGGATTTTCTTCGATCTGCTTTTCCGTCAAGTTGCGGGTCAGTTGGTGCACCATAGCGCCGATCATTTCCAGGTGCCCCAACTCCTCCACTCCAATGTCCGTAAGCAGGCCCTTCAACTCCGGATACGGCATAGAATACCGCTGGGACAAATAGCGCAGACTGGCACCCAGTTCCCCATCCGGGCCTCTTTATTGCATTTAGATATAATTAGTATAGATAAAGGCCGAACAGTCTTGTGAACTGCCCGGCCTTTTCTCACATCAGCATTGTCGATATTGGAATTATGCGGATAATGTCACCATTTTTGGCTTTAATGCCAACAGAAAGTTGTTTGTAACGCAATCCGTCATCCACTAAAACGGCTTCGATGATCACATAGTCCGCAGTTTCAACCAAATCTTTGGTATCTTCCACAATCATTTTTCATTCCTCCTTTGTTTTCCGTTATACTACAACGAGGCAATGATTGTCAATACCTTTCACTAATATTTTATCGACAAATACAGTGGATTAGAGAAGTAAACTTAATAACATCCACTACGACATTCATTTAAATATGCAGTTGATAGTCAATACCTCAGACAATGTCTATTTTTTCTTGACAACTTACCTTTTCCGTGCTATTCTTCTTATTGCAATAGCATATTTGCTATAATTCTGTATAATGTTTCTGATTGGAGGTATCATATTGGCGTATGAGGTAATTCTTTATCGCACCAAAAGCGGTAATTGCCCAATTGAAAAACACATACACCGTTTGCGTACCGAAAATAAGAAAAGCGAAGTCAACAGAATTCTGCATTATGCAAAATATTTAGAGACCTACGGGTTTGAAATGAGCCGTTACGTTCGCAATTCTATAAAGCAAATTAAAGGATCTAACCCAAAAATTTTCGAATTACGACCTGGCAACAACCGCATTTTCTTTTTCTTTTGCGATGATGACGGAGCGTTTGTATTACTCCATGCTTTCGAAAAGAAAACGCAAAAAACGCCCTCTCAAGAGATTAAAAGAGCCGAGAACGAATACAATGACTACATAAGGAGGAAGAACCATGAAGGAAAAGACTTTCGATGAATTTTGGGAAGAACTAAAAGACGAGAGCCCCGAGACCAGACGAGAACTTGAAGTTATGGAGGATTGCTCATCTGTCATCCGCCAATTGGTTGTTGCTCGCGTAGATGGCGGGCTAACCCAAAAAGAGCTGGCAGCGAAATGCGGTCTTACGCAATCGGCAATTGCACGAATGGAAAAAATGCAAGCAATGCCAAGATTGGACACGCTGATAACTGTTGCAAAAGCGCTCAATTTATCGCTATCTATCAACAATTCCTTACGACTTCATACTAACTATAGCGCACGAAAAAATGACGGCCAATATCGCGTTTCCAAAAACAAACTGTTCAGTGGGCCATTTAATGTATCATTCAGCGGGCAATCAGCGTGCTGAGTTTCAGAAAGGTAGATTCAATGAACCAATTAGCAAATTTTAGAATCGTCACTAATGAAGTAAAGATTATCAATCATGACATGGATGGAAATTTTGATGTTAGCCCAAATATCAACAGACAGACAGGCCATATTGAAAACAGCAGCAACTATTTCACAAAATTAACCATCTCTTTTGAGAACACCGAAGAACATCCTTTTCCGATAGATTTATCCGTCACTATGACAGCCATTTTTGATTTACAGCATTTGGATACAGACGATCAGGAACAAATTGAGCGCTTTCTTCGCTTTCAGGGTGTGCAGACCTTGTTTCCGTACATGAGAGCGACCATCTCTAATACTTTGTCCAGCGCAATGATCGCTCCCTTGACATTGCCCATTGTCGATGTGTACCAACTGTTTCCGGAAGATGCCAAGTATCTGCCGGAAGCCAATAACTAATCCATGAACAGCACAAAAAGCCCACCGGATAACGGTGGGCTTTTTGCTTTACTTGATGAATTTACGGTCAATATCCTTTTCCCATACACACAGCCAGCCGGAGGGGCAGCGCGCCCACAGGTTGCCGGTGCTGAGCAGCTTGGTCTCCAGCACGGTGATGGTGGTGCCGGAGCGCAGCATAGCGTCTGCGGTCTGCTTGCTGCTTGTAGCGTGTCGCCGGCCGTCCGTGGTCAGATCCTTGACCTTCTTGCGTCCGGCAGCAGCACCTGCGCCCTTGTAAATTCCCCGCACTGCGGTGGTGATGTATGTACCCGGCTTAACCGTCGGTGCTTTGGGCACCGCCTTTTTGTAGTTGACATCGCTTTCCGCATACACCGTCTTGCCGCCTTTGGCGTTGGTGAACAGCCAAATGCCGCTCAAATCAGAGGCAAGCGCCGCAGGCTGCACATACACCTCCCGGCCATTCTTGACCTTTGTGTACTTCCGGCGGTTGGTCGTCAAGGTAAACTTACCGTCGTACCAGTAGGGATCCAGCACGATCAGGTTACCGCTCTTGTCCAGTCCGCCCACATACACATAGTGGCCGCCGTTGGAGAACAGCTGTTTGCCGCCACCACTGACGCACACTATAGCTTTGCCACCGGCTTTCAGGTGGTTCTTCAGGTCAGCAACGGTCTTTGCCCGCTTGCTTACGATGGAGTAATGCTTCTCCAGGTACACTGCCACCGTGTCCATATCGGTGCCATCTGCGGACCGTGCGCCCATCAGTAGGCACTTCTGTGTCCAGGCTGCCGTATCCAAGCCGGTAAAGCCGAAGTTATGGAGCACCATAAGGCTTGCGCATACCCCGCAGCCGCTGGTGTAAATGCAGCCGGAGGTTCCATACTTGTACGGATGGGGCTTACTGGGATAGCGAATGCTTTTACATTTCTCCGTTGTTTGGCGGCAATAATAGAGCTTGCTCACTTGACCGCCTCGCTTTCTGCCGTCTCCGTGCGCTCCAGCGCCAGGGTTTCGTCCGCTTTCAAAGCAGCTTTTGTAAAGCTGTTGTTCTTCCACCATGCAGCCAGGGAAGCTACTACGGCCACCACCGTTGACACGGCGGTGTACACCTCATCGTCCGAAAAGGGCAAAGGGTTCTTGCCAAAGGCATTGAGCAATACATTCAGCAGAGATACCGCCAACACGACGGTTCTTGCGATTGTTCCTGTGGTTACTTTCATTTTTTGTTATCCTCCAAATCTTTAATTCTATGATCCGCAACAGCTTGCTTATTCTCAAGCACATGTATGCGATCCTCAACATTGTACATACGCTCAATCAGCGTATTGTGTTTGTCCTGCTTTTTTTCCAGCTGATCTATTCGGTACAAGGTCTTGCTTTGACTCTTATAATTGCCAAATAAATATCCTGCCAGGGAAAACACACCGGACACAATAGCTACAATTATAGCGTCACTCATGGCTATCACCCCCTTGCAGGGCGTTGATCTCTGCCCGGTACGCAGCCCGCTGCCGGCGGATCGGCGCATATTCATCTTCGGACAGCGCACCGTCCGTGTACTTCAGACAGAGGTAATCCGTCTCCGCCAGCTCGGACTTCAAAAACGCAATGCGGCTTTCTGTCTCCACATTCATTTTGCCACCCCCAATATTTCAACTTGCGTGCCTGCACCAATTGTTCGTCCATTGGTTGGGAAACCTAACGACTTAATCGCGCCGTGAGCCTCCACATCCTTGAATATGTTGAAGTTAACCTTGTTGCTAAGCCATATACAGCCTTTTTCCATGACATCAGCTGGTTTGAAGCCACTTGACTTATCTGATTTGTTTTGCATTACACGCACCATGTCAGCAGTCAATTCAACCTCTGCAACAACGAAACTTCCCTTATCTTTTGCAACATCGAAACGAAACGCATTGGGTATGTAAGTCTCAGATGTGTACGAATTCAAATATACAGTTTGGTCTCCGGCACTACTATTGGTAGTAGTTCCAACGCTAACCATGCGCAACTTAATTTTTCTGCACGGCTTAGACAAAATCCAGTTTTGTTTGTCCGTTGTATCGGCGTCAAATGTTTTGGTAAACACGGTCTCCCAGGTCTCAGCAGAACCGGTGTTGCCCGCAGTCAGCAGGGTGACCGTCCCGCTGCCATCCGCAGCTCGGCGGACCACCGCAACGCCAAAGTCAGATTGCGTAATCACGGCGCACTCCGTACCGTTTTCCTCAAAGAATGACACCAGCGCCCCGCTGCGCAAGGTCAAGGCATGATCGCCGCTCTTAGCATCGTCAGCGTGCAATGTAATGGTGCCCTTGGTGTCATAATCCACATTCAGCACATAGGGGCAGAACTCAGAGATGTTCCACCATTCGTGTAAGGTGACCGCATCGCCTGCCGCTTGTGCCAGAGTGCCCACCCAGCTGGTAAGTTTGGCTTGCAACTCATCACTTAACAGGTTCTCTGTGACCGTTTTTAGAGCCAGCCGAACTCCAGTTATTGTGCGTGATTTGATGTGCTTACCTTCAATGGCCAGTGAGCTGACCTTATCACCGGTGACAGCACCGTCCGCCAGCTTGTCCGTAGTCACAGAACCATCCGGGATCTCCACCTTGGCGGCAATGTCGGTTTTGTCCGTGTCCGTCAGCACATAGTCCTTGCCATCAGCGCCTGCAGGACCGGGATCACCTTTTGGTCCTTGTTCGCCCTGGGGGCCTTGCTCACCTTGTGGGCCTTGCGGGCCCTCTGCGCCCGGCTCCCCTTGGGAACCCTGTGGGCCCACTGCACCATCTTTTCCCGGTTCGCCCTGCGGTCCTCGCTCTCCATCTTTACCAGGAGCGCCCTGGGGACCCGTGTCACCCTTTGGGCCTTTAATGTTCACCGGTTCCGGGTTGTCCTTCCCGCCGTCATTGGTCCAGCTGATCTCCCCCGCTGCGGACACACTGGGCGTATAAGTGGTGCCATTCACACCCTTACCAATATCCTTGAGCAGTGCCTGCACCTTGGCGTAATAAGACTCCAACTCCGTTGGATCCGGTGCGTCCGTCTCCACAGCTGCCGGGTCATAAGAACCAGGGCGCACATAAAACACGCACGGCTCCGGGCTTATACGCTGCACCAACTGCTCGCCATCCACGGCATAGCCGTAAACGCCCAGGCGGCACATTCCCTCTTGCAGCGGCGGGGCGAAGCATTGTCCATCCACCACAGTGGCAAACTGGCCGTTCATGCACACCCGCACGACCAGATCGGCGTATGCCGGGTCCAGCTCTACCACACAGCGAATCTGATTGACATTCTCAGCTGTCACCGGGTCTTTGTTTTGTAAGATCACCGCCTGCTGGGTGACCTTAATATTTAATGTCTGCATAAAATCCTCCTTTTTGACATAAAAAAACAGCGTGTCTTAGCCGCCGTTTGCAGTTGACTGCAATTTGTATTTTACATGAGGCTCACCTCCAATAAAAAGGAGCAGGAATAGACACCTGCTCCAACTGACTATTTTATTTTGCGTTCACGCACGGCTCGTGCGCCACTCAAAAAGCCCATTATGTAAACGCTCAAAAGCGATCGGCTGCATCTCCACTGCACATCTTCTGAACAATCGGAACGATATGCATCACGGTAACAAAGTCTCGCCCTTTCCAAAATGTCCACCGTTGCTATATCCGACAGGCGTATAGCCTCATCGATGTTGCAACGACAACTAAAATTCTCATGTGATTCCATCATGGCCTCCTATATGCATAACAGACGGAAGGTTTCTCTCCCCTTGGGTGTTACCAATGTTTGAGTGCCTGCCCATTTTGTTTTATCATTATAGGATTCTTTGATTTCAAACAATCCTGCATTCTTGTCCTCATACGGCATTAAGCGCCCGCGTTTATCACGGTATAAATATTTTTTGTCTAACAGGAATGCAATAAAGGTCTTAGGACCGATTCCCAGTTGCTTTGCGGTTTCCCGAAAATTCGTAAGCAAATTACGACTTACCAATTCATCAAAATATTCTGCCTTTGGTTGCATTGTTTGTACCGCCACCGTAAGTTTTGAATTCTCCTGCATAGCCGTTCTTAAATTCTGCTCCGCCATACGCAGCGCCCGGGACATTACCATTTCAGGCGTATTCCAAGCATTTTCCAGCTCGATAAAATACAAGCGTGCCTGTTTACCTCTATCATTGCGCTGGAGCATACAGAGCTCCTTAGCCATTTCAATGGTCAACTGCGCATCATTTCCCGGCCTACCGCGCTCGCCGGTATTTTCGCACAAAAATGTGCGAAAATCATTGCCCTCCACAAATCCATATTCGCACATTCTTGGAAACCAGTTGCGAAATGAGCTTTTCACTTCCAAGAATTTATGCAATTCTCTTGCCGACACCGTTGGCCTATCGCCATCGTAATTCACTTTGATTAGCTCGTTCATAAACAAAAACTCCTTACAAAATAATCTTGCAAGAGGCCCTCGTATTTGGTATAATAAATCTATCAGTGGAGAACCTCTGCTGCTGTTTAGGGATTTGCTTGTGCTTGGTCGTGTAAGCAAATCTCTTTTTTCTTTTCAAAAAACGCCACATAATGCCGTTTCCTATTTTCGCCCAAAAATGGGCGAAAATACCGATTCACATTTTTTGATCATCCAGTGCTGTAATTGCGTCCATAACTTTTTGCGTTTCTTCTGCCGAAAAATCATAACGCAGTTTTTTAGAAAAAGTGCAATCGCTCATGCCCAGATAATCCGCGACTTGCCACAGTCGCAAACCAGAACGAATAATTGTACTTTTGATTTCTGACCCCTTCATTTTCGCACCTCCTTTCGCATTTGATGTCATCATAATATCATTTTCGCAGTATTATGTCAACAACATCAGCAAAATATTTTTTTGTCGTTTTATTGTTGACATATTCCCTCTTATGTGCTATTTTTAATTTAGATACAAAAACAATTATATTGAGGTGTTGAAAATGACGAATATTAACTACAAGGAAGTTGGCAATAGATTAAAACGACTGATTGCAGAAAAAAATATGAACCAAATTGAGTTTGCAAAGCTCTGTAATGTGAGCGAAGCTACTTTGCGATTGCATATTCGCGGTGAAATAAAGAAAGGGATCAACTGTGATTGCTTATATGCATATAGCCGGGAACTCAATGTTTCAATGGAGTATCTACTTACAGGCGTTGAAACAAAGAAGCCCATTGCAATAAAGTATGTAGACATTATCAATGCAATCAACCTCTTGATCGATGCATTTGGGACCGAAATTATCAGCCCATGCAGTGAGGAGTTTGCGGACTGTTTATACATTGCAGATGAGGCTATCCAAACCTACTTGGAAAAAATCAGGCTTAACGGACATATTCGCGAAGATCTTGAAAGAATCAACGAGGGTGAAACATACAACAAAATGCGTAGAGAGTGGGCAGGATTATCTTGCAACAGATATAGTCACACTACAAAGAAGATCATCCCCTACGATGACGATGACGACAACTTGCCCTTCTAAGTCAAAAAGGCTTTCGTCTACAAACAGACGAGGGCCTTTTTGTTTTTCTTGCAATCTGCGGGGAAGTGTGGTATGGTGGGGAGTGAAAGGAGAGATGGAGATGAAGTCTAAGGCCAAAGTGTGGATCCTTGTTGTGACCGTTGTAATGGCGGTGGGGGTCGGTATCGGTGTGTGGGTGCACTATGATCGAGTGCATGATCAGGAGACAGCCAGTCTGGTAGATCACGCTGTATCCAGTGCACTGGCTGGTGTTACTACACAGCCCACAGAGACCACTACAGAACCGGCAGCCACAGAGGCGACCGCAACCACAACAACTACAAAGCCCACAACCACTAAGAAGAAAAAGAAGAAGCATACTACCACGCAACCGCAAGTAGTGTATCGCACCGAAAGGAATGGCACAGTAGCCCCAGCCGCAATAAGAGAAACAACCGAATCAACGGTGCCGAAGCGTCCTGCTGACGCGCACTTTGATCCCATACCTTCTGACGATGGATATTACTGGGACACAGCTTCTTCTCGAGACGATCCGTTAGAAGAAATATATGTCGATGAAAGCGGCAGGCATTTCTATTTCAAAAAGGGCGATAAATCCACTCCAAGAATATATATTGACTAATAACTCTAAAGCGGCTGTTCCAGTGCGGAGCAGCCGCTTTGCTGTTTATTGCAATTTTGCTTTCAGCGCGTCCACTGCGGCTTGCAAAGCGTCCAGTTGCTTCTTTTGATCTTGGATCAACTTAAGCATTGCCGGTATCATGATACGATCTTGCCAGCTTTCAGGTCTCCCTTCACTGTCATAGATCACTGCGTTGGGGTAATGCTTGTCCAGATCCTCTGCAATAACGCCGATCTGCGTCCCGCTGACCAATTCGTTGTCCTTGTATTCTGGCTTGTAATTGTACTGGCACACCTGTACATCGTAAAGACCGTTTGGATCCAGCACAGCGTCTTCTACCGGTTTGATATTCTCTTTGTATCGTTTTGATGAGTTTGCGGTTGTAATAACGCCGCTTGTGTTTACAACCAGTGGAATGGTTCCGCTTGAAGATTTAAAACTCAGTCTAATATCGTCTTGTACCGTCAGTTTGCCTCTGATTGTCGTGGCGTTATCAATCCATATACTCTTCCCGACAAGGTATAAAACATTATCGCCACCATTCGCACTAAGCACAAACCCGCCTTTTGATTCAATCGTATCACGGTACGCAGTGCTTCCGCTAAGCGTCCAACTCACTTTAGACAGTACAAATCTGGTTTCAACCGAATCTTTCGATCCCGCTTGTATACACAAGTTGCCATTCTGCTGCATTCTTAAGCAAATATCTCCGCCTTCTAAATATGTTTTGGCTCCGTGCTCATACTGACCGTATCCAATTACAAGGCTGTTACCACCAGATGCAGCATTAATGATTTCATATCCGGCAAGATCATATATTTTTTTGTAGAATTGTACATCGGCATCAAATTTGGTTTTCCCTTCCACCGATAGGGCCCCGCTCACATCTACCGAACCATTGCATACCATATCGCCGCCCATCGTTACATACCATGTACCAGTATATGAACCGTTGCTGTTCTTTTTTTGTGCAGAAAACACCCAAGAGCCTTTGGTAGTTGGCTTTTGAATGTATGCACGATAACTACCCAAATCCGCATACAGTTCTCGGTCGGTGATGTTCCACCCGGCGATCGTGCCTTTATCCGCAAGGATCTCAATACCGGAGAGTCTACCGGCTGAAATGTCCGTAGCATTCAGGTAATACTGGTTGGTTTTTTTGTTGTAGTACACCGCAAAGTCCTTAAATGGGCCTTGCAGTCCGGTGGTAGAAACAGCCATGCCGTTCTTATTCAGCAGCAGGCAGCGTCCTTTGGTCTTGCCCTCCGCTGCCGGGTACTCTCCGATATAAAGCGCGTCTGACACACCATCGCCGTCCCGGTCGATCAAAGCAGCGTAACCACCAACTGCGTTCGTGATAGAATCCGTGGCGTCCTGAATGCGCTGCGCCAACGGCGCTGTGACCTGCTGCATAGCCTTAGAGATCATGCGGGAAAGAATGCTTCCGGCAGAGCTGCCCTCCTGTTCTGAACGGGCATGGGCGGCCACATCCATAGTGACGGAGCCATCATAATCATACTCCACACCCATCAAGGGGATATGGTGATCGCCGGTATCGTCCCGGTAAGTGATCACATCAAAACTATCCAGCGCCGGATTGGCCGTGAGCAATGTCATACTTCCCGGTCGGTACTGTATGCCCAGGTCAAATACAGTCTCACCCTGGTCGCCATCATCTATGTAGATCATATCGGATACAGCGTTAAATACTTTTTCCGCTTGGGCCTGGGTGGTGATCAGCGGATTGTCGAAATACAGCACCTCGCTGTTGACCGACAGACTATCTGGTGCAAGAATATTCTTATTCCCATTGTTGCAACTGATCCCCAGGTAGGTTTTGTCCGTCTCTGCCAGAGAGACCTCTGTGACTGTGTCGTCTGTCACCGTGTATTCTGCCGTACCATCATATACCTGGGCGAAAGTATCTACTCGCAACTTGCCCTCTCGGTCAAAGACGGCAGCACAGCCGCAGAACCCAGCCACATAACCGATGGCATCATTCACATTATAGGCAGTGACCTGCTGCTTGCCGTCCTCGTCTGTTTCCGTACCGCAGAGCAAAGAAACATCTACCGTGCCAAAGCCGGAGACCTTGCTCTCCACGCCGGCAGCCAACTCAAAGTTACCCTGGCGTGCCAGGTCTTTTAAGATTGCCAAAGGGGTCTGCTGACCGCTGATGGCGGCAGAATACGGCATAGAAAGATCATACATGTGGTCGTACATTTCCAAAGTGGTACATTCGCCGGACCGAGTGACCTTTTCCGGATAAAACACGCCCATTGGCACCCACTCCACTGAACCGTTGACCATACAGCCAAAGTACACCACGGTTTTCTGCCCGCGAAGCACGGCACCGGCGGGCACAGCCCACAAAACGCAGTTACACCCACAGGCGTAGGACTTTGCCAGCGCGTAATCATCATGGCTGATACTGCGGTCAATATTCAGCTCCATAATGTTATTTTGCTCATTTGGGCTTGTAGGATCCGTCTCATCGTTGTAGCCAAAAATGAAATTGCCACATTTAACCTTCACATAGATCCGTTCACCGTTTTTGATGGCTTGGTTAAACGCTGTGCTTGTCTTGTACATAAAATACTCCTTTAGCGCTCGATGGCGTCTACTTTGTAGTTGATGAAATACCGGCAATTCCTGGCACCGGAATAGGCTGTCCAACTGGGCGTACCAAAGTAGCAGTTGAACGAAAACACCGTATTCCCGGAAGTATCCTCCAGTTTAATAGAATGCCAGGGCTTACTCGCATTGTTGATCACGCCGTTTAGCTTGTCCAATTCCGCCCGGGTCAAGGGCGGAAAGGACAACTGCCTTGTTTTTTTGACCTGAACGATACTGCCGTTCATATAAGCTGACTTGGAGCGGCCCGTGTTAGAGGACCACACCTTTTCATCTGAACAGGATATGGCATTGAATGATGGGTTTGGCATTTTTGTGCCGTCAATATATAGTGGCATACCGTCCCTCCTTACGCTGTGGCCGTAACCGGGTCACGGCCTTTCTTTTCTGTTTGGTTCACATCGTCCAGCACCACCGTGCTTAAATGCTTACCGCCCACATATACTGGGATCGTTACATTGACCGCCTGCCCGCTGCTACCCAGCATTTGCACCATCATTGCGGCTACCTTGCTGATCCACTGGGTGTTTCGCTCCAAAGGCACAACAGCCTCGGCGCCTTTACCTTCCAGCAGACCGACCTGGCCTTTTTTCAGCACGCCGCCCTTTTCCAGCTCTGGGATAGTGGGTATAGAAAACAACTGGTACTGGCCGTTGGTCACGCTCACGCCCAGGGCGCTAAGCACATTAGACAGTGTGCTGCCAACGCTAATCAGCAACTTGTCATTGATCTTGCCAACCATATTGTTGACCAGTTTGATCACACCGTTTAAGGGGCCTTTAAACGCATTGGTAAAGGTGGCTTTCAAATTCTTCAGGCCGTTCTTTAAGCCGGTCACGATCTTACCGCCAAGGCCGGTGACTTTTGATACAACGCCATTTTTCCCGGTAAAGAAATTAACAACGCCGTCCTTAAATCCTTTGAATTTTTGGCTGACCTTTTTCCACAGATCGCCGATACCGTCAAACAGGCCTTGGGAAATAAAGCCGCCCTGCTTTTTCATAACCTTAGACGGCGATTTGATCTCAAACGCTTTTTGGAAACCATTGATAAACGGTTGGAAAATGTGTTCCTTAACCCACTTCCATGCATCTCCAATGCCGTCAATGATGCCGTCCCAAATGCCCTGGGCCACATTGCCGCCGGCTTCTTTGATCTTGTCGCCAAAATAGGACTGTATACCGGACACAGCGTCAGAGATAAGCTGTCCCAGGAATGCACACAGGCCGCCTAAAGCTGCACCAAGCGATTCAAACAGAGCGCTTGCCATTCCACCAAAATCAATACCGCCTATGAAGTTTTCCAGCGCTGTTGCAAGCCCGCGCCAGTCCAGGTTTTCCAGAAATCCGGAAATGATCTTGAACACACCGCTGATTGCATCGGACAGGGTCTTTGCCACCTGTCCCCAATCAATGGTGTTGAATATACCGTTCAGGTTTTTAGCAAAGCCTGCGCCAAGAGCTGCAAAATCGAATGTGGTCAGAAAGGTATCCAGCGCACCGAATATGGTATTTACACCGTTGCCGACAATCTGTCCGGCGCCCTCCCAGTCGAAGTCACGGATGAAGCCGTTTAGGCTCTTGGCAATACCGCTGACAGCGCCGTTGACTTTGTCCTGTATGCCTTTCCAGTCCAGAGCGTTGATCTTGCTGATAATCTTATTGCAAGAACCGGCGATCTGTTCGCCGATCCCCTCAAAGTTGCCGCTTTTCCACAGGTTCTTGATCTTGTCCAGATATTGGGAAAACTTATCGGAAGCCGCAGGTGTGGCGGCGGCAGTGGATCCGGACGAAGCGTCACTGTCCTGCTGGTCATCGCTTACCTTTGTGATTTGATCGAAGCCGTACAGCTCGTTTTTTGCTTTTGCCAGCTTTTTGGTTTCTTTCGTTGTTTTGCTTACGGCGGTAGCCGTAGCATTCACTTGTGAAGCGATCCCCACAGAGGACAGCAAGCCGCTAATGGCATTAGCCACACTCATGGCATAGGGCATGAGCTTTTCAAACAGCCCCACAACCACATTGATGGCCGGTGCCAAAGCATTTGCAAAAGCATTTTTCAAGGCTTCTACACGGTTATTCAGAGCCTCGTTCTGACTTAAATATCCGGTGATCACCGAGCGCAGCTCGCCGAAAATGTTTTTACACACTTTCAGCCCCAACGATACCACACCTATACGGCGGATAGACTTGACCACATTCAACAGGGACTTGCTGGCCGTACCGGAAGAAGCACGCATATTTTTCAGGTGACTATGCACCTTGCCGAAAGCGGCGCCCGCTGCAGATCCGATATTTCCAAATATGCCCTTTAACCCGGAGAAGCCCTTTTTCAGTTTCCCTGCTGCGGAAACATCACCGGTTTGCTTGAGCTGCTTGCTCATACTCTTAAGCGCAGGAGCATTTCTGGATATAGACGATTTCAAGTTGGAAAAGCGGTTGCTTTCCGTTGCTATATCCGCATTGGTTTTGTTGATCTGTCCCGTGGTCTGTGCCATTGCACTCTTCGCTTTGAGAATCTGCGAAGAGGTTTTGCGGATTTCATTTTTCAGCTTGTCCAGCGTATCCGTTTTTAAATTATTCGGATTCAGGCCAACCTCTTTCAGCTCGCTGTCAAAGACTTCTAAATCGTTCTTTATACGATTGATAGCCGCCCGCTGCTGTTCAATCTGATTGATCGTCATGCCGCTGGTCGACGCTGTTTCCATTTTGTGGATCCAGTCTACCATCTCCTGATACTGACTGCTTACACCGGCGATGCCGTCCTTATAGGACTTCAAAAACTCCTGCTGTGCCCGGTAAGTGGCTGTTACCTCTTTTAAGCGGCTGGACAACTGCTTGTATGTTTCGTCCTGGCTGTGCAGCTGATCTTTCAGCTGTCTGGCTTTTGCCGTATACTCGGATATTTTCGCAGCACTGCTCATAGCGGCCTGCACATTGCGCTCTTGGCTCTTAATAAGCGTATCCACCTGCTTTCCCATCTTCCTTGTATCAGAAGAGGCGGAAGACATTGCCTTGGCAGTCACCGTCTTAATTTTATCCGTCACGCCGGACAGCTGCTTCAGCTCGGCTTGGAGAGAGGCCATGCTCTTTTTGTACTGGCTAATATCCGCAGTAAATCGTGTTACCAATTCCTGATCCACAAAATCACCTCCTTTTCTTGTTTTTCAATCGTTAAAACTGATCAAAGTAGGCCATTGCTTTGGCCGCTTGAATATCCAGCACATCATCCTTTGTCCAATAGGGGAAAAGGTCATACACTGCGCCCACATCCTCCCCGGCAACCGCAGCGGCGATAACCCCGGCTTGGATATAAGCGATTTGTGACAGGTTTTGATACTGCCTTTTCTCAAAATCACGATGGAACAGGATGTAACGCTTTAGTTCTCCATAGGTCATGGCGAGAATAACGGAGAACGACAAGCCATAAGCGTTGGCCTCCAGGATCATATCCTCCGTTGTGCAGTAATTACTCCCGAAAGGAAGTGGACGGCTTATCCTCACTCTCTGTGGACTTCTCCACGCCGTCAAACGCAGCGTTGACCATCTTTTCAATGCCGGCGGAGAGCTTCTCGGCCTGCGTATCGCTCAGTAGACCGGACACATTGGCCAGCTGAAAGAGAATGCTTGAAAATGCGTCCACGCCGCTAACGCCGCTATCCACCAGCGCGTCATACAACGCCTCACCGGTCAGATCGCCGTTGGGATCATCGTTAAAATGCAGTGCCTCATCCAGCACAGCCAGCAGCCGCTCCGGATCACTGGAAGCGCTCAGGATTACATCCAGGGCGTCCTCCTTAAATCTATTTTTCAGTCGCAGCTGGGCAGCTACAGTCAAACGCAGGTGCACAGTCTTGCCGCCATTCAGCTGCAAATCGTATGTTCTGGTTACAGTATGCTGATTATTCATTGCTTACCTCCTAAAAATGAGGGAGACGGTCTCCCGCCTCCCGAATAATCGATTTACGCGGCGGGGAACTCTCTGCTCCAGTCGCCGTCCAGCTTGTAAGAGACAGTAGCCTCCATCAGGCTGTTTACGCCCGGTCCCTTAATCGTCAGGCTGGGCACCCCAGAGTTGTTAAACTTGGTGCCGTCCGGCAGCTTAACCATAATGGGTACGGACACACCGGCGTCCTCCAAAGTTGCCAGCACCCGATAATCCGATGTGGCGTCCTTTGCGTTGTACAGAAAAGTCACCTCAAAGGCGTCTGCTTTCTTGCGAATACCGGTAATGCTGTGTTCCACATCATCGTCATAGCAAGTGGCGTCCAGTTCTTCCCGTTCGCCCTTGGTCAGATCGCCGATTTGGGTGGCGTAGTTCAGGCACTTGGCTGTGGGGCCGGTATAGTTGGGATATACCTCAATGCCTTTGGACGCAAGACCGCGTTCCGGCTTTGTTTCGTTCATATAAAATCCTCCTTAATCTATCAGTCGATTGGTTCTTGTGTCTACCCGACGGCCGTAACGCAATGATTTGCGCAAATAACCGCTGGGGTCGTGTAAGAGCGCGTCCGAGGACGCAAATTGCCGGATCAGGCCCAGCGAGGTCAAAGCCTCGTCTACCTTTTCCGTCAATTCCAACAGGTCCGGCAAGGTCATAAACCACAGATCCACCTGATAGGCGATCACATCTACGCACGCCAGTTCCGTGCCTGTATTGGTGATCTCATAAAATGTGATCAGGTTACCTGTCGGTTTGCTCTCCGGAAATGCCATCTTAATGTCATAGGGAATGTCCGACTGTACGGATTTTAAGGTATCCCGGATCACTGCACGGTAGTTTTTCACTTGATCGCCTCCTGTATAGCGGTACCATAATGCTCTGCAATCACCGACTGCATTTCCTGCATGCCGTTATACATAAAGAGCGCCGGCAAGCGACCTTTTAGTCTGCGAAAACCGTAACCTGGTATATACGCAGTCCAAGGCTCGTGCTTGCGCACAATACCCAGCTCACTGTCCAGCGGTGTACCCTTTTCGTCACCCACAGGCCCGGTTCCGAATTCCACATAGGCCGCATACTGCATATTGGTACGGCTGCCTGCGGTCACCCGATCACCGTCACGCTCGCAAAAGGCGGCGATGGACTCCCGCAGCAGTCCGGTGTCCTCCGGGCAGTTGCTGCGCTGGCGGCCGGCCATATCCTCTGCGTCCTGCAGCATTTGCCGTTCCAAGTTGTCCAGCAGATGATCTGCGGTGCGTTGCAGCGTCTTGGCATAGGCACTCAGCTTTTCAATCTCAATGTTTGTTTCCACCGGGTGCTCTCCTCTCTGTGGCATTCGCTGTCAACAACCGATAATACAGGAACTGCTGCACGGTCTCCACCTCCAGCCAGCCAATACCCTCTACCTGTACCAGGTCGCCGGGCTGCACGCCCACAGGGTCATACAACACGGCTTGATACCCGGCAGACAGCACCCGCCCCCGCTCCTCAATAGGGGCAGAAGCAGATACCGGCTGCCAGCACAAATACAAAATGGCAGGTGTAGCACTGTATGTGTTCTGCTCAAAGTCGTAAGCACTGTCTCTGATCGTCTGTGCGGAGAAAATCCGTGATTTTACAGTCCACGACTTAGGCGTTTTTGCTTTCACCGGTGCGCACCTCCCTGTATCTGTTGTACGGCTGGAGCAGGTCGGCAATGGCTGTCTCCTGCTCCGCAGGGGTGGTATAGGTCTCGCTCATAGATACGCTGCCCTCTGTATAGGACGCACTCTTTACACCGTAATCCCGATCCTGTATAAAGCAGTTCAGGTGCACAAAAGCCAGTTTGGCCAGTGTGGTGGCCGTTACCACCGGCGGCAGCTCTTGCGTGCCCAAATAGGTCAGGCAATCGTCCTCTGCCATGTCCAAAAACAGCTGTAAATCCAGCTCTTCACCGGCGTGTGCGTACCAGGTCTCGCATATCTTGTCATATCGCCCGGCAGCGGCCCGCAGCAGCCGCAGGGCCTTACTTTTCATCTCATCAGTCAAAACATATCACCCCATAAGAAAAGGCGCCTTATTTGGCGCCCTTTTTTGTATCCTCTTTTTCTTGCAGCTGCCAACCGGCATTCAAATAAGCCGGCAGACAACTCCGATCAATGACCACTTGGGTCTTGCCCTGTACAACGGTTACCTTTTCCATTTGTACCTCCCCGGGCTTAGCCCTGCACCTTGACGATCATATTCTTGTCCAGCGTGGTCACGCCGTACAGAATATCAAAGGATACGGTGTCGATCTTGTGGGTGCTGTCGTAGTCAAAGACCACACGCACACCCAGGCCGTCCGCAGAAGCCACATAGGCGTTCTTGTTACCCATCGGCAGATCCATAGGACGGGTCACCAGTGCCACGCCGTTGCGGTGGAACCCTACGGAAGTGGGTGCAGAAATCACCGTAGCGTCTTTGTTGGTCAGCGCGGCATGGAGCGGCTGGTCAATAGCCACCTCGGCCACCGCGCCGCTGGCAGCCGTAGCATCTGCGGCAAAATGGTACACATAGCCGTCCACAATAAAGCAATCGCCCTTTTTCACCGTGGCAGTAGCAGCAGTCACAGAGGACAGCGCCACCTTGCTCTCACCGGCAGTACCACTGACCTTATAAGTCTTGGCAGTGCCAACGGCATTGTCCAGATAACCGTAGGGATACGGTGCGTTCTGGCTCATGTAGGTGTCCATGGTGTACACCTTGCCCAGCTCTGCCTCACGCAGGGCGGTACCATCGCCGGCATAGGATACCTTGGACATATTGTCGTCCGTTGCATAGAGCACCTTGTGAGAGGGGTTCAGCACCAGGCGGCGGTTCTGTACCGGCACACCGGCAAAGTCCAGCAGGCTGCCCACCTTGGCAATATCTTTGATGGGCTTTGCTGCGTCCTCGCCGGAAGCGGTCACTGTGCGGCCTGCGCCCTCTACGGCGGTAGCCAGCACATCCGCGTCCACTGCGTTGGCAATGGCCGTCATAGCCGGTTCAATGACCTGTGCAGAGAAGTCCCGCAGGTCCAGGCTCATCTCCTTAGAGGTGATCTGTACGGTCACATCACGCAGACGATCCATCTTTACAGGCACGCCGCCTTCGTTCAGCTCCTGGGGATCCACTGCGCCGGTAAAGTTCTTGGCCGCAAACTTGCTGGGACGGCGTGCGGTTACCGTATCGCCAACCTTAACAAATTCTTTTTCATAGTCCCGGTGCACCAGGTTGGCCATCACCAGATTGTTTTTCAGTACCATCAGTGCCTCATTGGCAATGACATTGGGGGTTAAAATCGTGTTCGGCATTTCTTATTCCTCCTTAGCCGTTGTTTTTTCTCCACGCTTCATAGGCGTGGAAGTCTGTGGGCGGTACATTGTCGCCCGCTGCGCCCTTACCTGCCGGGGGCGGGTTCTTGCCCCGCAGGTTGGCCGTGGTTGCGGCCTGTACTGCCTCTTGAAATGCGGTGTCAAAGGCTTCCAAATTCTTTTGAGAGGCTTCCGCGTCACTCCCGGTCAAGAATGCCGCAAACTGCGCAGGCAGCTTGCGCTGGAGCAGCTCTGCCGCCACAGCTGTTTCCAGCTGCTTTTTGGCAAAGGCCGCTTTTTCCTGCTCAAAGGCTTGGCGGTCCTTGTCCAGGTTGTACCGCTCCCGCTCCTCCTTGTTCATGTTGGACAGCTTCTTTGCTTCGTCCGCCTGTTCCTTGGCGCTTTCCTCCCACTTGGCTCTGGCCGTGGCAAGCGCCTTGCTGACCCTGCTGTCAAATTCACTTTGGAATTTCTTGTCTTTCAGCAGGTCGTCAAATGTTGGAGTGTCGTTGCCCCCATCGGAGTTGGCGCCGGTATCGCCCGCTGCCCCCTCTGCGTTGGTGTCTGCTCCATTTTCGCCGGTATCTTCGGCAAACAGCTGGAGGTTCAGCGGCAGGCGTGCGCACACCCGGCTCTGCTCCTTGTTGCTTTCCATCTCGGCATTGTGTTTTGTCATTGCTGACTCCTTTCCCAAACCGTACGCTGCCGGTTCGTTAAATGATATATCCCCACAGGCATAGCCTGTAAATGGGCATAAAAAGAGCAGGGCTGCATTGCAGCTCTGCTTTCTTCATGTTATTGGTATTTTTTTATCGCATCCAGCCAATCCTCTGGACACTTTCCATCGTAAAATTTGTCAATAACATCTTGTATCGCTCTTTTTCTTTCCTCTGCGCTGATTTCTCTGTGCCCTGTTACTCTTGCTACAGGTGGATCATTCCATCTGGGAGCGGTAAATAGCTTTTCTTTTTTCATAATTCATTCCCTATTTCTCATACAGAATAATTTTTGTAACAGAGTTGTTTTGAAGCAACTCACCAACAACAAAGCTACTACCACGCACATACAATATCTCTTGCTCGCCTGCATTAAAAGATCGAATATCCCGTCCATTTTTGCACTGCGGAATATAGATTTGCACCTCTGCGTCCGGGTTATAGGTCTTTCCGCAGGTTGCAGCTATGTACTCGTTGTAAGTAACTGTGTTGCCGACCGCGTGCGTGTTTACAAACCTTTGCAGCTCCGTGGGATCGGATATAACCAAAGAGCGTTTGACCGGTCCGTTGTACCTGGGGAATTTCTCAAGCGCACGGTCTAAGTTAGTTATAGCGCTTTTTTCCTCGCTTGTCAACTCTATACCCTGCCGCAGCTTTTCGTTAATCGGATAAAAGTCACTGGAGACCCAGCTGTTCATTGCGTATTCTTCCTCTTCCGTCAAGCCCAGGTCTCTTTTCTCCACATACTTTTCATACCACTGGGCGTAGGTCATATCTGCCGGTACGGTCATGGACTTGCCGGTTACCGGATCCCTGGCCCAGCGGGTGCCTGTGCGGTTGTTGACCGCCGGCACGGTAATACTGCGGCAAAAAGGGTGCATAGGCGGCACATTTTTGCCCGGCTGCGCATCCTCTACCAAAAAGGTCTTGCCGTCCAGCTGACGGCACACGGCGGAGGTGCGCAAATCCAGAGTAGCCATAAACCGATACCGGATAATGCCCGCTGCTTTATAGCCCTCTAAAAAGCCCTGATTGGAGAAGTGATTGACCTCTGTACGGATCAGGCGGCTGGCACAATAGCGTTGCCCGCTGTCGCTGTCTGCACCTATGCAGTCCTCCAGCAACCGCTCCTCCATATCGTGCAGGGTCATGCCGGTCATGCAGCCCACCTCAATGGTGCGTTGCAGGCGCTTGCAAAAAGCAGCGTTGTTCTTCCACACACGGTCGGAATAGTTTTTGCCGCTCCACTTATGGGTAAGTGCGGCCTGTACACGGCGGTCACTGATCAAGCGAAAGTCATATAGACCATTACGCTTTTGGTCGTTAAATATAGTGCGGTAGTATGCTTGTTTGAGTGTATCTGTCAGTCGCGCTTTCGCCAGCCGTTCCTCCCGCACGCCCATGGCTACGGCTTCCGCACGAATAGCGTTCTGTAAAGCATGCAAACGGCTGATACGGTCCGCATACGCAGGAGCGTCCAGCATAGCGATCAATTCACGCCGTGCCTGTGGTTCCTTAGTCTGTTGTAGCTGTTCCAGCAGACGCTGGCGCTCCTCTGCGGTTTGGTCTGCGCTGAGCAGCTGCAAGGCATAAGCCTGGCTGATTTGACCGTTTTTAACATACCGGCGGAGAATACGCTCAATTTGCTCGTTGAGCTGCTCTACACCCTGGGCGTACATACGGTTGACCTCCACCATCGTTGCGGTGGTGCGCGCTTGCAGCAGGTGCTCCAGGTCAACCGTTCGCCTTTTCCAATACTCTGCTGCCTTCATAGATTAAGCGTCCTTTTCTTCGTCTTTCTGCCGGCCTGCCGTGTCTTTCTCTTCGTCCTCGTCCTTGTCCTCGTCCTCAGTCTTTGGGGCAAAGCTGTCCATATACTGCTGCTGGTTCTCCTGCTTTTGCTGCTTCATGTTCTCCACAGCCTCTGCCGGGTCCTTAACGAACCAAAGAAGAGACAGCAGGGTCTGATCGTCCACCAGCCCGGCATTCTTCAAGGTGCACACCATAGAGACAATCTGCGCCTCATCAATGGGCAGCGCCACAGTAAACACCATATCCACATCATCTACGGACACCGGGTCTATGCCGTTATGTGCCAGCCAGTTGTTGTATAGGGTCCAGCGCTTCTTCAGCCCCGCCTCCATGGCGCTCATCTTGCTTTTTACCAGCAGGTGCAGGGCAAGCAGCTTGAGCTTTAATGCCACGCCGCTGGCATTACCGGCAAAGGCCTGGTCTGTCATATCCGGGGTTAGGGTCATCTTGTGAATATCCGATACCAAGGTATCGTCCAGTACCTTCATGGAGTTTTCGTCAAAGGTCTTTTGTATGTATTCCAACCGGGCGTCCTGGGGAATGCCGTCAATGAGCCGGTCTCGCTTAGCTGCTTCCATGGTGTCCTGGGGCAGAACCGCGCCGAATGCTGCCAAGATGGAATTGACAAACTTACGCTTATCTGTAAGCCGGTCGGACAGCAGCTCGTTTCTGGCGTCAATCAAGTTGGCCACCTGTTCAAAGTCGCCCTGCCGCTCCTCGTTGTTCTCATAACACACCACCGGCACACCGTCAAAGAAATGGGGCACAGGCGCGCCCACCGGGTTGTACACATAGTTTTCTTTATCCAGCGATGTGCTTTCGTACTGCTGATACTGGGTAGTCGTATAGACTGTTACCGCATAGTACCGGCTGCGGTCTGTGCGCTCCCGCTGCTCAAACCACAGCGCAAACAAGTCTTTGTGCTCCACAGTATCATCTTGCACCAGCACGATCTGATCCGGCGCATACACTGCGGATCGCGGGCGTGGTTGCTCCTCTGTGCTGGCATATAGCAGCTCACAGCTTTCGCCGTATATACCAATTGCCTTGCCAATCCGCTGATCCACGGTGGCAATGTTTTGGCTGTGATAAGCGGCCATAACGGCAGAAATGTCAATTTCCTTGCCGCACAGATCGCACAGGCCGTCTTTGTTTTCGTCCACAGCGTTATGCCGGATCAGGTTGCCGCTTTGCCGATCCAGCTTGGCCTCCACCGTAGACACCAGGGACAGCTTGGCCTGGCTGTCTTTCTTGTCCTTGTCGTTACAGTCGTACTTTACCGGCTCGCTCAGGAAATAGCCACGGATAATATCCACAATGTACTTGGCATAGTTAGCCTCGGCCCGCACATCGTTCTCGTCCTCTCCTCGGTGGATTTGCGGCACGCCAATATATCGGCCATAGAGGGCACGGCAGCGCCGCGCATATTCGTTTGCCCGACCGACCACATAATCAATCACGGCAGACGACAGTACGCCCTGTTCCGCCTCCGGCACATCCCGCCGGTTCATGTAAAGTATCATATTCAAGTCCTCCTTGTTACGATCCGCCCCAGCGCCGTGCTTACAAAATAGCGCATGGCGTCCATGGCGTGGTCATCCTGTTTGATCGGCTCATCCAGCCCCGCCTCTGCTGCCTTGTCATTCCAGCGGTAGGCGTAAAACTCTGCAATGGTGCGGGTGCAATCCTTGCTGAACAGCAGATCCGCCCGCTGCAGCAATGTGCACACGGTACGGATCCCGTCCAGCACAGCGTTATCCGCCTTTAACACCTTTAGCCCCCGCCTTTGCAGTTCTGTAATGAAAGAGGCCGCCGAAGGGTCAACCACTACGCAGGTATACGGCGTATCGCCGATAAAGGCCATCATCTCGTCCGCATACTCTGCGTCCGTCCTTTGTTTATGGTTCTCTCGCCCGGAATAGTAATACTCCTTGGTGCATAGCCACTTGCCGTGGTATTTTCTCCACATCAAGAACACCGTGGGGTTTAGCGTACCGTAGTCCACACTGATATAAGCAGAACCTTGCAGTTCGTTATCCGGCGGCAGCGGAATACAGTGCCGACTTTCATCAAACATATCGTAGATTAGGCCCTCTGCCACTTTCCATTCGCCCAGAATGTACCGGGCATAAAAAACGCCCGCATACATCGTTCTGTACCGGGCTTTGACCTCCTCTGTTAAGGACAAATTGTCGTCCATCGTAAAGTGGAGGTAGAGTATTCGCTTTTCTTGCCGCTTCTCCGGCAGGATCCATTCTTCATAAAACCAGTGGTGTGGGTTATCCGGGTTGCAGTTGAACCAGAATTTTGCACCACTGACAGAGCACCGGGCGGTAGCCTGCTGCACAAAGGACTGGGGCATTAAAGCCACCTCATCGAAAAACACACCTGCCAAAGTCATACCCTGGATCAGATCCTGGCTGCTTTCGTCCTTGCCGCCGAAGATGTAAAACGCGTTTTCCGTACCACCCCGCGTCACCACAAGCACATTGTCGCTACGGCTGTATTTTACCTGATACCCGCGACTTTGCAGCATTGCAGGCAGAAAAGAAAGCACATTCCGGCGAAAGGAGCTGATCGTCTTACCGCACATGGCAAAATTCATGCCGCTGTAGGTACTCATGGCCCACAGAATATAGCTAAGCGCCATACTTACCGTCTTACCGGATCGTATAGCGCCGTCTGCAATTATTCCGTTTTTGTCGCTCACAGGTGATGTTTTGCACCACCAGGTGAGCACCTGGAGCTGCTTGGCGGAGAATGGCTGAAAATGAAAGGTGCTTATTCTTCCCATGCCTGTTCACCCGCTTTCTGCTCCAAGGCCTCCAGAAAGCCATCGTCCGTCTGCTCATCTTCATGCCCTCGGGCCAATTCAAAGTGACGCAGAAGCTCTGCCAGGGCTTTCACCCGATCAGATGTATTCGGCGGCTTTGCCGTCTCTGCAAACCCGATGGAGCACAGTGCGTTCAGCACATCCGTTGCGGTAAAATCCAACTTGTCCAGCTTTCGCTTTTCCAGCTCAGCGATAAATTTTTTTACCTTATCATTTCTTAGCAATCGGCTTGCTTGGCTTTCTGCGCTCCCGGGCGCCTTACAATTCGGGTAAGCAGCCTGGTAAGACCGTTTCCCATTATGGTCGAGCACATATTCATAACAGAACAACCTTTGTTTAGGTGTTAAGGTCTCTTTACCCACGCTGCTCACCTCCTTTGTAATAATTGCGGATTATATGCTGTTATTTTTTCTGTTTGCTGTCTGGGAAAAATTCATCCAGTATTTCAAGCCGAATTCTATTTTTGCGGGTTGCTTTCTCAAAACACCGCTGGCAAATCAGTATAATCACTGCTGCTATTGCTGAAGCAACTACAACCACGCCGAATATCTCAATATGACTATTCTGAATGTCACTCATCTTCTGTTGTATCTTTTGAATTATTCCAGCATAGTTTGAGTATTCTTTAAGCAATGTTTGAAACTGATCTTTCAAAATGTCATAAATCTTACTTTGAAAGACTGCAAACCATGAAAATATCATCGATATTACAGAAATCGTCAAAGGAGTAGTGTTTATCGCGGTTTTCTCTTCGGCCTCTGCTAAAATGCGTTCGCGTCGGCGTTCCGCCGGAGAAAGGTTAGTCAGTTCCATCTTGATCTTTTCATACTCTCGAACTTTACGATTTTTCCGTTTCTTCTTCTGTTGCTGCTTGCCTAAAGGTTTTTTAGAGCGTTTACGCATGTATTTGTTTTCCCCCCTTTCGCTCACCATAATTATAGCACATCTGAAAACAGGCCTCGTAATAACCGCATTTTAGGAAGGGAAAGCACAAATGCAAAAACCAAAGAGCGCACCGTTTGGAGCGCTCTTTCAATCTGTTTGGCAGTTTATACTATAACACAGACGGCAACCTGCATACTATAACATCAACATGCATTGCATAGTGGTTTTTTTAATTTTCGCATTCCAGCATATCCAGGGACTGCGGATGAATGCGAGAGACCAGGTGATTGTATGTAATATCTTCGTCCACCGCGATCTTCTCAAAAGTGTCACCGTTCAAATACCGCCGACGCAACACACGCCGGTGCAACGGACTGCGCACCTGCTCAATAGCAGTCTCAATTTCTGCCCGCTGCAACAGAGCAAGCCGGACTTGTTGGTCCAGCTTCTCTTTCAGTTCTATAATGCGATCTACCGTCAAGGTAAAATCTGCCCGCTGCCCGCCTCCCGGCGTGGGAGAGAGGGAAGCCGTGATCTTTTGCGCCCGGCTGTTCAGTTCTTCGATCTCCTGTTGTGTAATCTCAACCTCCGCCCAGCACTCCCGATAGCGTTGCAGCCATTCCTTCTTTTCGTTGTTCGTCATTTTTCCTCCTGCTTTTTATTCTGCTTATTTCTTAAAGTTCGGACCAAAGCCGATCACGCCGAAAAATGCAACAATAATCGCACCGGTCACAAGAATAATTTGTGCTGCTGTACACATCCTGCTCACCTCCCTGTACTCCCGAAACCGCCGCTGCCGCGTTCGGTGTCCGCCAGCTTGTCCACCAGCACCAGCTCCGGAGTGTCGATCTTGACCACCACCAGCTGGCTGATCTTGTCCCCACGGCGTACGGTGTAATCCATACCGCTGTGGTTGTACAGCTTGACGGCAACGCTTCCGGTGTAGCCCACATCTATAACGCCCTCGCTTGTAATGCCATACTTTACATTTAATCCACTTTTGGACTTCAAAAAGCCTGCTGTGTGTACCGGAAGTTCAATATGTACCCCGGTGTCAATTGTCACCGCTCCATGTGCAGGAATTACCGTGTCCATTGGTGACAACAGGTCAAGCCCTGCGTCCGTTGCGTGTCCTCTTTTTGGCATTAAAGCCGTGCTGTTTAACATAATGTTCATATTTCTTTACTCCTTTTCTTTCATATCTTTGTCTGTTACCTCGTCCATTTTTGCACCACAGTAAGGACAGTAATTCAAATGGCAATCTTCAATAGGTGACATTCCGTTCGCAGTGCCGACTCCACCACAGTTTGAACAAGAGTAATAACCGCAATACTTGTTCTCTATCCAATGAGCGTGCTTTACCGTTTCGACTGTCGGTTGTTTAATAATCAAATCATAATAATAACTATTACAGTCGTTCCAACCTTGATGTCTTGCGCTCTGGATTTCATCTTCCATTCGTGGATTAAGATATTCTGGTCTATTATTTAACAATTCTTTTCTATTGATTAAATCAACCATTGCATTCGCTCCAATCTATTCTCTGTCCACAATGTTCACAGAATTTAGGCTGTAAACAAGCATATTGCAATTCCATATCATCTCCCAAATAGCACTTGCAAATAGAACAATACCAATTGTTTTGTTTGTGTTCTTTGGTTTTATATGGCTTTTTAGGGATCTGCTTTTCAAGTACCCTATGGATTACTTCTCTACACTCAACAAGGCCTTCTCTTGATATTGATTCTCCTTTATAAACGAAAGAAAAATCATCTATAAGTGCATTTGCTTCTTGATATGTCATTCTTCTACCTCGCTTACAAGTCATTTTTTCTTCTCCTTTACGCATTCAAATACCCACGCAGGTAATAAAATGCTATAATCTTTTAATGCTTGCAATCTCATGTCTTTAACAGATGAAAAAACATTTTTTTCGATCAACAATCTAACTGCTTCTTTGACTGATTTTTTTTCATCATTCCGTTTACATAAAAATTATCAGGACCGCAGTTAACGTATTCCTCAAGAAAGTTTTGTATTTTTCTGTTATATGGCGTGTCTGTCATTCTTTCTCTCTCCCATTCTCGCAGCTGTACTGCCCCCTGTGTATCGTCTTTCCGTCAGGTGCCAGGTGTTTGCGGCAGCCGTATTCATTGCTGCCCAGGTTGCGACCATACTGGCAACGATCACAGCGCACATAGAATGCACATTGTTCAGCCATCTGTCTGTGTCCTCCAGTTCCGCAGCTCGACCTCCACATAGCCATCCAAGTCATAGGTCTTGAGCACTTGCAACTCCACCACCTGCTTGTCATCCGGGTAAGCCAGGCCGTTCAATGCGTCCAGCACGATCTTGGCGATGTTGTCTGTGTCCGGCTTTTTTGTGGGCAGCACCCTGCCAGCCATCATCTCCACCTTACGCTTTTTGCTGGCACTCTTGGGAATGCCAAACGCTGCAATGATCGTTGCACTGACCGGCTCGTCCACAGCGAAGGCCATCAGATCTCCATATACCTGCCGGTAGCAGAACCGCACCTCGTCTTCGTAGTCCTTGGTCTTCCTGGGCGTATATGTAGCAATATGGTCACCTCGGCGCACAGCCCGGTGCCGACCCTTGCCCTGGGGCTCTCCCGGTATCGTCAATCGCACCATCATCTTGCTGTCACCAGCCTTGCATAAATCTGCTGGGCCATTGCTGCCGTGGCCAGCTCTTCATCGCCGTGAGCGTTCAGCCGCTTGGCATACCGCAGCAGCGGCTCCGGATTGTTCTCATCCACCAGCATGTACCCAAAGTCACCGGTGACGATGGGCACGCCCTGTTCCTGCATAGCCTTGCGCTCTGATCTCAGGTCCCGCTCGCTAATGCGCGTCCGCCGCGCCAGCTCTTTGCCCCTCACCGGCATGCCGGGCGGGATCAGTGCGTCATAGATCAACGCCTGCCGTGGTGTCAGTTTGTTCAGTTCCATAGGCTCCTCCTAAAACTTGATGTCTGTGTTGTTCATGGTGTCCCGCTTGATCTGCTCCAGGTCGTAAGACGGCGGGCTTTGCAGTGCCCCACTGTTCTTCCTGTCCTCTGCGCCCCACTTCTGCAAAACAGAGAAGTGGTCGTAATAGGTCTTGTGGGTGTTGTGAATGTGGAAGGACAAGTTCTTGATCAGTCGCTGCCAGTCAAGTGGGAATTGTTTTTTCAGCTTGGCAAGCTCCTCATCGGTTAATCGCACATTTCGATATTCGCCATATAATTTTGCGGGCGTGCACGCGCTCGCGCGCTCTCTCCCTTCTCTCATTCTTTCATTCTTGCATTCTTGTTTATAGAAAGCGCTTGTTATTTGATTGTTATCTGTTTGTTGTTTGTTTGTTATTTGATTGTTATCTGTTTGTTGCCTATCGTTTTCCAACCCTTGATATTTGGCGTAGTTACGCAGGATAATAACGGTATTTTTGTTTGTTACATTCTTGGAAATCTCGCCAGTTTTTTGAAGGTGTTTCAGCGCCGTTCTCACTTGCATATCTGACAGCCCGCTACCGCTTGCCAAAGCGCTGATGGAGGTTACCACGGAGCCGCTGCTCAGCGTTTGGCCTCGCCATTGCTGCGGCTCCCTGTTGACGATAAGCAATAAATGCAAGAACAGCTTGAATGTGGGTACATCGGTGTACCACTCCCAATCCAACAGTTGCCGGTAGGCTTTCACCCAACCCTGATTGCTCATATCTACTCCTTAAAACGGCAGGTCGTCGTCATCATCAATGGGCTCAAACTCTGCGTCATCTGCCGGTGCGCTGCCTGTGGTCGCCTGTGCGCCACTCTCTGCCTTTGAGCCGCAGAAGGACACCTGACTGGCCACCAGCTGCACGCTCTTGCGTTTCTCGCCGTTCTGGTCCGTATAGTTGTCTGTCTGCAAAGAGCCCTCCACGGCGATCATAGAGCCTTTATGGAAGTATTTGCACACAAATTCTGCCGTCTGCCGCCAGGCGGTGCAGTCAATAAAGTCCGTCTTGCGTTCCTCGCCTGCCTTCTGATAGCTGCGGTCCACAGCCACCTGGAACCGCACAACGGAGACGCCGCTGGGCGTGGCTCTCAGCTCCGGTTCGTAGGTCAGTCGACCCATAATTACAACGCTGTTAATCATAGATAATTCCTCCCAAAAATAGATATAAAGTCCTTGTCCGGGTAGGCAGTCTCAAATGCCTGCTGCCCTACCCGGTGTAAATAGTCCATCGTCTGCTTGCAATGGTGTGCACCTCTCGGCGGCTCGTTGTGGCAATTATGGCACAGGAGCACCGTCAAGCCGTATTTCTCGCTTTTCCGTCTGTTATATGCCCCAAATACATGGTGTCGCTCCAGGGCCCGCACAGAGCCGCACAGGTAGCACTGCCGCTGCTCTTCCGGCTGAATAATGCTCTTCTTCACTGTTTCCGTTCCTCCCAAGCAGACATCAGCTGCGCCAGCTCCGCTGGCGGCATAGTCTCAATGTCCAGTGCTTTGCAGTCCTGCACCACAGCGTCTATGAGCCGAGCCATGCGCTTTGTGCCGTAGCAGCTGGTGCCGTAATAGAACCGCACCAGCGAGGTGCGCGGGTAGATACCATCATCCACCTTCTCCGCTGTCCAGCCCAGGCCGTTCATCCCCCATGATTTCGTCATGGCATTCACGGCGCTGTCCGGCAGTTGGTAGTCCACAGACTTGCCATACTGCCGCACATAGCCCCGGTAGATCTCGTCCTTGGTGATCTGCGGGTCGTTCTTGGCCAACTCCGCTTGAAGCTTGCCGATCAATGCCCACATGTAGGCGTTAGCATCCAGACTCCGGCGCTTCGGCTTTGGCTTGATCTCCAGCACATAGTCCTTTTGCTCCGCCAGGGAGCCGATGAACGCCCCCACCTTGGCCATAGTGGGCACCAGGTCTTCCTTTTTGAACTCAATCTTCATTACAGCCCCAGCTTCATAAAGATTTTGTCCGCCTGCTGGCGGCTCAGGTCGTCAATGCGGCTGACCTTGTAATAGACCAAGGCCTTTTTGACCCGCTCATTCTCTGCATTTTCTTTCAGAATAGCCACCTGGTCCGGGCTGATCTTCTCCGCTGCCTGCTGCCGTGCCTGTTCTTTCTTCGCGTCCTGGGGCTGCACCTGCTGGTACTTTGTCCGATCAGCTGCCCAGTACACATCTGCACCGAACCCTAACATCTTGCAGCACACCGACAGAGCGTCCGTATAAGCCATCTTGTAGCACTCATCGGAGGTGTACAGGCCGCTACGCTCCTTGGCCACCAACGAGGAACCGCCAATACCCGGAATAGGGGCGCTCCATTCATCGTTGTACTTCACATAGAGCAGCAGTTGCACATACACAGTCACCACGCCGTCCGCGCCCAGATCTTGCCATGTGCGGCTGACTTCCACCTTCCAACCGATACCACAAGGGCCAAACTGCTCCGTCAGTGCCTTGATACGCCACATTGGGTTAATATCAGTCATGCCCTTTAAGCGGCCTGCGCTAATGTTCTTCTTGGCGCTGTCCGGAACCTTGCGCACCGCCTCATATATCTTCATGTTCTCCATTCCATTCACCTCACTTGATCACGCAGCCGGGGGTCTCAATCAGCGCCGCACCGGCTACCGTCTCCCCCGCCAACAGAGCTTTTCGGATAGACGCCTTGTCCACCTTGGGCGGCTGGGGCTGCATGTATTCCGCCGGCACCGCTGCCAGATTGAACACATCCACCGACTTACTCGTGGTACTGGTCAGCACGAACCGTCCGGCCTGCACCTTATCCTGCTGGGTGGCAGCCAGGTACTGTGCCAGGGTCTTCTTCATCCGCTTAATGGCATTGTCCGCCCGCCTCTGTTTATCAGCGAAGAAGTCCTTTTCTCGCTTGTAGTCCTCCACATCCGCCGTCAGCTGCCGGATTACCATACCGTAGTCCTCCAGTTTCTCCGGCACCATCATGCTGTCCAGTGTGTCCTGGACCGTCTGTTCATCAATCTCTCCGGCTTCCAGCAGATCCATCAGCTGGGCTGCCTGGCCGGTCAGTTCATACAGTGTCGCCATATCGTTCTCCTTTATCTATATTCAATACAATGCGGGCCTCTGCCTGCGCCTCTGGGTCGCAGTCTTGGGGGCAAAAGCCGTAGTCCTGCACAAACTTGTCCATTTCTGCGCTGGTCATCAGATCACCCCCAGGTCGTAGCAGCTGCGAAGCCAGTTTTCGCTGCGCCGCACAATGGTCACTTCCTTGTTGTTCTCGTCCAGCAGCTGCTCCAACTTCTCGCAAGCACATTCCCAGCAGTAGCTGCCGCTGGGCTCATCGTTGCCCGCACCGATGGAGAACCCATAGCCCTCAATGGCAATGTCGCAGCTGTCACAGGCGATCACGCCCGCCTCTTTGTCATACATCGGCATTCTCCTCCTGCTTGTCTTCGTCATACTCCAGCGGGCGAACAAACCCATACGCCTTAGGCAGCGTCAGCAGAGCCTCGCTCACAGGTACAGACACAGCCTCCAACACATCGTATGTACAGCCCTGCACGGCCACTCTGTAACCGGACCGTATTTCGCTGAACCCAGGAGCACGGCACACCTTGCCATTGGTCATGATCACCAAGTCCATATATTCATTACTCATTTTCATCATCCTTTCCAAGTTGAATTGCGTGCAAATACGCCAATTCAAAATCTGTCAGCGGTGCCAGCAGCACCACTCTATCCTTATCATCTTCAACCACCAGCTGCTTGTCCTGTCGGGGCTCGTCCTCGTCCTTGGGCAGTACGAACACCGCCAGGGCGATCAGACCACATCCGGCACCGCTTACAGCCACGGACACCCACCAGTACGGATTGTCCGCCACCAGGCAGCAGCCAAGCAGCACCAGCAAAAAGCCGGTGACTACCAGGACAGCGCCTGCTTTTTCTCGTCTTGTCATATCTTCGCCAACTCCTTAACCTCATCCGGGTGCTGGGCGTAGTAGTCGCTCATGCTCTCTGTGAGCCGGTGCGCCATCGCCGCCAGCATGCGGCTGTGTTCTTCTTCCGTCAAGTCCTCCAAGGGCTTAACCTTGCCATCCACCATAACCATGATCACGGTGGTCAGTTCTTTCTTCATTTCGTTCACCTCAATTAAAGTTACGCAAGGCCGGATTGTCCGTATGCCTTGACTTTTTCTCTCTCAACGCCTATACTATAGGTGTTGATAATTGTGTTTACTCATTATATTAAGCTTATCAACTCCTTTGACCGACTGTGCCCGCAGTCGGTCCTTTTTATTTGCCAGCCCTTAAATCAGCAGCAGACCGCCCGCTGCGATAAATGTGATGTTGGGTGGGCGGGCGTGCGGGAAATCAAAAAAGAAAAGAAGAAAGAAAGAGAAATGAAAAAATACATCCCCGCTGCCTGCTGCTTATTCAAGGGTTGGCATTGAATGTATAATGCGGTTATTTGAATTGGTGTTCCAGCACCTGGCGCAGGCACTTCTCCATATCCGCTTCGGTGAATTGGATGTTCTTATCAGTCAAATAGTACAAAACCGCTCTTAGCCTCCAATGCGCCATCAGCGCACTGATCATCGCAACAATGGAAATAAGAACCAATACAACAATCACTTTTATTCACCTCGCTTTAGCTGCCTGCTGCTTATCTAAAGGCTGGCCGCTCCGGCTCGCCGTCTCATTATTGGGACGCCTTGCACAAAAAAATATCGACTTTATCAGCCGCTTTCGTAATTTGCAGGACGCTGCAAATTCGTTCAATTTCTCCGGTCTTGAAGTCACTTCGATTGTTAATTTTAAGGCTCAATGTGTCCTTGTTCATGCCTATTTTCTGTGCAAGGCTTGTCTGTGTTAAACCCGCACTGGCAATAAAACCTAATAGACGATTCTTATTAACCAAGCTAACACCTCCTTTTGTCTTGCTTTTCGTTCCATTTTTGGGACGACTTAATCATACCACACCAAGAAACCGATGTCAAGCATTTTTGGGACGATTTTTTGATTTTCTCCGATTTATCCTTGCTTTTTTGGGACGCTTGTGTTATTATCATTTTGCAGAGGTGATAATTTATGAACGAAATTGCCGAACGATTACTTGATCTCATTAATCGAAACAACGCAACTTACGGCGAATTATCAAAACAAACTGGAATACCTAAATCCGCTATCCAAAGATATGCCACTGGAGAAACGGAAAAGATACCTATTACAAGAATAGAACTACTCGCCAAAGCACTCCATTCAAGTGCAGCCTATCTTATGGGTTGGGAAGAACCCACCTCTCTCCGTGCCCCGGAAGTGACAGAAGATACTGTGATCTTCCCGGTAATTGGTGAGATTGCCGCAGGGTATGACTACCCTGCATACGAGGACTGGAGCGGCGAAACGGTGGAGATACCCAAGTCTTACCTGCATGGCCGCAGCCGGGACGACTTCTTTGTGCTCTCTGTTAAAGGTGACAGTATGTACCCGCAGTATATGGACGGCGACAAGGTGCTGATCCTGAAGCAGAACACCATGAACCGCTCCGGTGAGATTGGAGCTATCATCTATGACGGAGATATGGCTACATTAAAGAAGATAGAATATGTGGACGGTGAGGACTGGGTAAAGCTTATTCCTATCAACCCGGAGTACACCCCTAAGACCATCCGAAACGAGGACCTGGAGCAATGCCATGTTCTTGGCATTCCCCGCCTGCTGGTCCGCGAGATTGAACAGTAAAAAACAACCATTCTGCCAAGGCTGGCAAAATGGTCACACATAAATGAAAAAGAGTATGAAAGAATTATACAGACAAATTGCAAAAATCGGACGGCAATACGGCGCGGCCAAGGTGGTGCTTTACGGCTCCCGGGCGCGAGGTGACAACCGGCAGCGCAGCGACATTGACTTGGCGGTGTACGGCATAGAGGACCGGGCGCAGCAGGCGCTGTTTGCCCAGGCCATTGAAGATCTGCCTACCCTGTTGGACTTTGACCTGGTTTTTGTCAGCCGGGACACAGACCCCAAGCTACTTCAGAATATAGAAAAGGACGGTGTATCCTTAATGAGCAAATATGAAGAAAAGCGGGACAAATTCAAAGACGCAGTGCAGCGCCTGGAGGAGGCCATTGCCGACTATGACAAGCTACCCAATTCCACCATGCGTGACGGTGTGATCCAGCGCTTTGAATTCTGCACCGAGCTGGCGTGGAAAACCTGCCGTGAGTATCTGCTGGAGCAGGGCTATACGGAAGTGAACAGCCCCAAGCCGGTGATGCGCCAGGCTTTTGCTGACGGCCTTGTGGACAACGACCTGGTGTGGGTGGAGATCCTGAATGCCCGCAACCTGACCACGCACCTGTACGATGACGCAGAGGCCACCAAGATCTTTGAGGACATCAAAGACAACTATCTTCATCAATTCCAGGCGTTGGCCGGGAAGTTAGAGTAAATCACAACAAAATAAAAAAAGCCCTACCCTGCGCCAACAGGATAGAGCCGATAAGCAGGATATGCAGTACATAACCCACCCAACACTGGATATTGTACCACATCCCTGCCGATAAATCAAGCAGGGTATTTTTGCGCCCTTTTTTAAGTACAATCTATGGGAGTGGTACAATGAAATATGCAGCGGCATATATCCGCGTAAGTGACGACCGGCAGGACGAGTACAGCCCGGACAGCCAGCTTAAACTCATTCGTGAGTACGCCGGCAAAAACGGCTACTGCGTGCCGGATGAATATGTATTCTATGACGATGGTATCTCCGGGCGCAGCGTAAAAAAGCGCAAGGCTTTCAATGATATGATCGCCTTTGCAAAAAGCAAGGAGCACCCATTCCAGGCAATTCTTGTATGGAAATTCAGCCGGTTTGCCCGCAACCAGGAAGAAAGCATTGTGTATAAATCCATGCTGCGGCGCATCGGCGTGTCGGTGATCTCCATATCCGAGACCATAGACGACTCGCCCTTTGCCCCGCTGATCGAGCGCATTATAGAATTCATGGACGAGTATTACAGCACCCGCCTGTCCCAGGAAGTGACCCGGGGCATGACGGAAAAGGCAAGCCGTGGCGAAGCCATGAGCGCCGGTGCCTTTGGCTACGACCTTCAAAACAAGGTGTTCACACCCAACGAGGACGCACCCACCGTGCGGTACATCTTTAATGCTTTTCTGTCCGGCAAAGGCTACCGTAAGATCGCCATGGAGCTGGACGCCATGGGCGTAAAGACCTACCGAGGCAACCCGCCGGACAACCGCTTTGTGGAGTACATACTGATGAACCCGGTGTATGCAGGTAAAATCCGCTGGAGCACAGACGGCAGAGCCTCCAGAGACCGGTACAAGGGCGATAACAGCAAGGTTATGTATGTGGACGGCAAGCACCAGCCGATCATAGATCAAGACACATTCGATCAAGTACAGAAGAAGATCATGGAACAGAAAAGACGGTATGGCAAATGGCAGCGCAAGGAACAGCCGGTTGCGTTCATGCTGAAAGGCCTTTTACGCTGCGACACCTGCGGTGCCACGCTGACCTATATTGCCGCCAGGGATCCCGCCGTTCAATGCCACAACTACGCCCGGGGCAAGTGCAAGGTATCCCACTACCTATCCATACGCAAGGCCAACGCTGCGGTGATTGCCGCAATCGAAAAATCTCTGGAGACCCTGGAATTCAATGTGCTTCCAAAGGAGCAGCTGCAAAATGAAGTGGTAGACTACTCGCTGCTCATTCGCAAGGAAGAAGAAAAGATCAAGCGGGCCAGTGATGCCTACGATGCCGGGTATGACACACTGGAGGAATACGGCCGCAAAAAAAGAGCATTCCAAAACAAGATTGAAACACTCAAAGCCGAGCAGGCCAAGGTCGAGAAGTCACAAAGCAACGAAATTCCGCCCCAGTTCGTACAGCAAGCCAGTTTTGTGCTGGATTTGATAAAGTCTCCGGAGACAGCGGAAAGCGTCAAGAACGAAGCCCTGCGCTCCATTGTAGATCACATCACATTCAAAAAACCGGACAACACACTGGAGATATTCTACTATATTTGATGGATTTTCAGTCGCATTTTCCGCCACGAATTGAAAAATAAGTGCGATTTTCGGCTTAACACCGTCATTGCCTGTCCATATTTTGACTCTATATCTAAATGCAATACAGGCCGCCGTACTGACTGATGATAATGGACGCAGCGCGGGGGTCCGGGTTCTTAATATTGATGGGGTATTGCAATTTTTTTATATAACTAAACATACCATCTCTCCTTTTCTCTGCATACTATGCAGAGACGCCTGTTTGGGTGCGCATAGAAAGCGAGCCGTCAAAGCAAATTCCGTCCTTTTTGTGCAAATCGGTTGCCACGCAGGGCAAAATGTGGTAAAATAAAGGCTCCAAAAAATCCCGCTGTTCGGGCAGAAAGCGAAGGTAGAATCATGGATGTATTTGAGGGAATCACAGCGCTGGCAGATTACGGCGTACGCACCGGTTTGATTGAAGAGGCGGATCGCACCTGGGCTGTCAATGCGTTGCTGGCGGCGCTGGAGCTGGACGCATACGAGGAACGCACCGTCACCGGCCAACCGGCACTGACGGAAATTTTAGACTCTCTGCTAAACTATGCCTGTGCAAACGGGCTGTGCCAGGACTCTGTGGTGTACCGGGATCTGTTTGACACCAAGCTGATGGGTCTGCTGACCCCGCGACCCTCTGCGGTGATCCGCCGATTTTGGGATCTGTACGCAGAGAGCCCCAAGGCAGCCACAGATGATTACTATGCCTTTAGCAAGACCACCAATTACATTCGTGCGGACCGACTGGCCAAAGACGCTAAGTGGATCACTCCCACCCCTTACGGCGATATGGATATAACCATCAATCTATCCAAGCCGGAGAAGGACCCCAAGGCCATTGCGGCTGCCCTGCAAATGAAGCAAAGCGCTTACCCCAAGTGCCAGCTGTGCAAGGAGAACGAGGGCTACGCCGGGCGGGTCAATCACCCGGCACGGCAAAATCACCGGATCATTCCCCTGGAAATGGGCGGCGGTCCCTGGTTCTTGCAGTATTCGCCCTATGGCTACTATAACGAGCACTGTATCGTGTTTAATGGCCGGCACACGCCGATGAAAATCGACCGCAGCGCGTTCCAAAAGCTGTTTGATTTTGTAGAGAAGTTTCCCCACTATTTTGTAGGCTCCAATGCAGACCTGCCCATCGTGGGCGGCTCCATTCTCACCCACGAGCACTTCCAAGGCGGGCACTATACCTTTGCTATGACCAAGGCACCGATAGAGACCCCCTATGCCTTTGCCGGATATAAAGATATTGAGGCCGGAATCGTCAAGTGGCCCATGTCCGTACTGCGCCTGCGTGGGGATGAGCCGGCGCGCATTTGCGACCTGGCAGACAAAGTGCTGCAAGCCTGGCGCGGCTATACGGACCCGGATGCCTTTATCTACGCCGAGACCGATGGCACACCCCACAACACCATTACCCCTATCGCCCGGTTCCGGAACGGTAAATATGAACTGGACCTGGTGCTGCGCAACAACATTACCACCCCGGCGTGCCCGGACGGTCTGTACCACCCCCACCCGGAGTACCACCATATTAAGAAAGAGAATATCGGCCTGATTGAGGTTATGGGTTTGGCAGTACTGCCCGCCCGGTTAAAGACGGAGCTGGAGCTGTTGCGTGACGCACTGCTCCATGGCACAGACATTGCCGCCGACGAACGCATTGCCAAACACAAGGACTGGGCAATGGAGATCGCCGCCAAGAACGCCTTAACCGCCGAGAATTGCATGGACATTCTGCAACAGGAAGTGGGCAAAGTCTTTGCTGCCATTTTGGAGCAGTGCGGCGTGTTTGGCCGGAATGAAGCCGGTAAAGCCCAGTTTCTGCGCTTCCTAAGCAGCATAGAAACAGCATAAAACAAATAGACGCAAAGAAGCCGCACAGAAATATCTGTGCGGCTTTGTTCTGTTCATTTATAATCAGACTTTGATCTGCACGGCTTTGCGGTACACCGCCAGGGCAATACCGGCGGTAAACAACTCGGTGATCCAAAAGGCATGCCACACACCGGTGGCGCCCAGCACTCGACTCAACAGGAATGCCAACGGGACGATGATGACCAAATACCGGCAAAGAGAAATCACTAAGGACGGCGTGCCCTTGCCCAGTCCCTCCAGCGCACCGGAAGCAGTCACCGATACGGCGGACACAATGAACCCGCCGCTGATGATTCGCAGCGCTGTTTTACCGGCAGCAACAGTAGCTGCATTCTCGGTAAAAAGACCGATCAGTTGACCGGGGATCACCAGGCACAGCACGGTGCCCACCACCATAATGGCAGCAGTCATCACTAATACGGTGCGGAAGATCTGCTTGACCCGCCCATATTCCTTGGCGCCGTAATTGAACCCAATCACCGGGCGCATGCCCTGCACAATGCCGTTGGCCGGCAGGTACAGAAACGTTTGCAGTTTGTAATATGCGCCTAAAATCAGCACATAGGTTTGAGAGAATGCAGCCAAGATGGCGTTCAGTGCAGAGATCAGCACCGAAGGCAAAGCCAAATTCAGTATCGCCGGAATACCGATGGCATACAAGCGACCCACCAGGTGCCGGGACGGCCGCAGGTGCTGCAAGCGGATCTTGACGGAAATGGGGCGCAGGTAATAGAACAGCAGATAGATCACCAAAGTAAGCACCTGACCCAGTCCGGTAGCCAGCGCTGCGCCGTCAATGCCCATTTTGGGGAACGGCCCCAGACCGAAGATCAACAGCGGATCCAAAATAATATTGGCCAGGCAGCCCAGGCCCAGACCCACCATGGTCACCTTCATACGACCGACTGCCTGAAAAATCTTTTCAAATGCCAAGTCTGCGTTGATTATAATGGAAAAGCCAAACACAATGCGCCCGTAGCGCACTCCCAGATCGATCACCGCTTGATCCTTGGTAAACGCCTGCAAAAACAGCGGAATGATGGCAATACACACGCCGGTGAGCAGCACCCCGTGCACCAGCGCCCACAGCATACCCTGCGTCGCCGCCTGGTCCGCGCGCTTCTGCTTTCCGGCGCCCAAATACAAAGCGATCACTGCGCTGATCCCCACGCCAAAACCAATGGCAATGGCGTTGACTAAATTTTGCAAGGGATACACCAGCGACAACGCCGTCATAGCGTCCTCGCTGATGCGGGCCACAAAGTAGCTGTCTACAATATTATAAAGGGCGTTCACCAGCATGGAGAGCACCATGGGCAGCGCCATAGAGGTAATCAGCGGCAACACTGCCTTTTTGCGCATAAACTGTTCGTCCATCTGTTTTCCTTTCTACTTGCAGGTATAAAAAAAGCCACGCACCCCAAAGAGTGTGTGGCGAAAAGATGAGCAACTCCGGAAAAATCCACAACCGAATTTTCGTCCCGTATTGTAGCATAGCCGCCGCCTGCTGTCAAGCGGCAGCAAAAAAAACGAAAAAAATTTACCGAACGCCTTGACTTGGAGTAAACGCAAAGTGCTATGATAAAGGCAGCCAAAACAAGGAGATTTTATCTATGAAATACGCAACAGAAGAAGCCTTTGTCGGTGCCAACGCATTTGGCAAAGGCGCCGCCAACACAGCTTATGCCCAATACTTTGTGGGCAATTCTTATCTAAATCCCCTTACCGATCCTCAGGTCACGGCGCTGCATTTGTCCAATGTGACCTTTGAGCCGGGGTGCCGCAACAAATTGCGAAAGCCGCCAAACAATAGCCAAAAAACAAGAACACCCCTGTACAGCAGCAAGCCGTGCGGGGGTGTTCTGAATCTGAATGCAGTTATAGGATGGTGGCGTGGCTGCCGCCGGTGGGAGCCTTGGTGACCAGAATCTGCCGGTCGATGGCCGCGCGCAGGTCCGCCACATGTGAGATGATTCCCACCAACCGGTCGCTGCGAGCCAGATCCGTCAGGGCGTGCAGTGCCTGGTGGAGGGACTCTTCGTCCAGGGAGCCGAAGCCCTCGTCCACAAACATCGCGTCCAGCCGCACGCCGCCAGCGGCACTCTGTACTCGATCCGACAACCCCAGCGCCAGCGATAAAGAGGCCTTAAAGGACTCGCCGCCGGACAGACTCTTTACACTGCGGGTGGTGCCGTTATAATGGTCGATCACATCCAGATCCAGTCCGGACTGGTTACGATTGTTCTCTGCCGTTTGGCGGCGCACCAGCTCGTACTGTCCGCCGGACATAACCATAAAGCGGGTGTTGGCACAGTCCAGCACCGCGTCCAAGTCCTGCATTTGCACATAGGTCTCCAAGGTGACCTTTTCTTTACCGGTCAAGTTGCCGGTGGCAGTATCTGCCAAGGCTTTTATCCAGCCGTAGCGGTGCTCCGCCGCCTCCAGTTCGGCCGCCGTGTGCCGCATTTGATCCAGCACCGTTTGATTGGTCTGGAGCCGAACAGCCAGTGTCTTGCCTTGATCGGTCAGCGTATGCAGCCGGGTCTGCAACTGCGCCAGCTGGGCACGCAATGCTGCCGGGTCCGCTGCCGGGCAAGTCTCCAACTGCTGCCGGGTCTGTTGCAAAGTGGCTGTCAAAGCCGCCGCCTGCATGTCCAGCTCTGCCACGGCAGCTTGCGCCTTTTGGTGTGCCTGCTCTAAGGCATTTCGTTTTTCCGTTATGCGGCGCTGTTCCTCTTCCGCAGCCGACTGGGAAGCAAAAGGCAATTCTGCCGCCAGTTCGCTACACCGACTTTGCTGCTGTTTGACCTCTTGCTGCAGCTGCTGCACCTGCAATTGCAATTCCGTCTGCTGCCGGGCACGCGCTGTGGTGCGCGCGGTGACTTGCGGCAAAGCCTGCTCCACCTGCGCCGCTTCTTCTGCGGCTGCCTGGGCGGCCTGCTTATTCGCTTCCGCCCCGGTACAAGCCGTCTGTGCCTGTGACAGCGCTTCTGCCAAAACCGATTGCGGCTCCTCCGGCAAATCACCAAGTAGCGCTTGCCACCCGGCAATAAACGCCCGCTGCTGTTCTCGGTACTGTCCCTTTGCACCACCGGCGGACTGGCTGGCAGTGGTGGCCTTGGCCATAGCGGATCGGGCCGCCTGCTGGGTTGCCTCCAGCTGTGACTGTGTAGGCGCCTGCGTGGGCAAAACCGCCGGATGAGGGTGTTCCGTGGCGCCGCACACCGGGCAAGGTGCACCCGGCTGTAAATCTGCCGCCAACACGCCGGCTTGGCTGTCCAGAAAAGCCCGGTTTTGGCGCTGATAATCCTGCTCCAAACGCTGGGCGTGCTCAGCCGCAGCCTGATAATCGGCAGCAGCACGGCGATAAGTATTCTCCGTAGTTTGCAGCGCAGCCCGCTGCTGTTCTAAAGCGGTCAGCGCCTCTGCCTTTTGCCGCGCCTGTGTACAGGCAGCCTTGGCCTGCTCCAACCCGGCGGCCGCCCCTTGCAGTTCCTGCCGCCGCTGTTCCAAACGGGTTTGTTCTGCGCGGGCTTTTTCCGCTGCTTCACCGGCTGCCGTGTATGCCGCTGTTTGCTGCTCTGCCTGCTGCCGCACCTCTGCCAAGATCTGCTGTGCTTTGGTCAGCCGGTCGTACTTGGGCAGCTGGGCTTGCAGCAAAGCCAGGCGGGCAGTAAGCGGTTTCGTCTCCTCTGCTTGTGCGGCGCACTGCTTCAATCTATCCGCTGCCGCCGCTTGCTTGGGGGTCAATTCCGCCTGCTGCCGGGTCAGCTCTTGCAGCTGTTGTTCCAGTTTCAAACGGCGCTCCGCAGCTGTCAATGCTGCCCGGTCTGTTTGCATTTTCTCTTGTATTTCTGCCGTTTGGCGGGTGTTCTCCGCAGCGGCAGTCGTGTCTAACTGAATCAGCTGTTCCAACACCTCTCGGCTTTCAGAAAAGGGCAGCTGACCTTGTTGCAGCGCCTGCGCTTTGGCAAAAAGCATAGAGTCCTCCGGGCAGCGCACCCCTTCGCCATATTGGCGCAATTTTTCCTGCCCGGCGTCATAGGCGCGCTTTACCTCCAAAGCAGACTGTCGCAGCTTCTCCTGCAAGCAGGCATACCGCCCGGTGTCAAACAGCTTTTGGAAGATGCGACTGCGCTCCTCCGTCTTGGCAAGCAGCAAACGCAAAAAGTCCCCTTGCGCCAGCATAGCAATCTGGCAAAACTGATCGTGATCCAGCCCAAGCAAGGCGGTGATTTCGTCATCCACTTCCGTTGGTTTGGTAATCACCCGGCCATCCGGGCAGGTCAACTCCGCCATAGCGTGCTGGGTAGTCATGCCCTCGCCCCGGGTCTTGGGCCGCCGGTACTCGGGACTGCGGCGCACGGTGTATACCGCCCGGTCGTATGCAAAAGTCAACTCTGCAAAGGTGGGAGTCTCCGGCGCTGCGTACTTGGAGCGCAAAGTGGATGGTTCCCGGCTTTTGCCGCTGGCCTTGCCATACAGCGCAAAAATAATGCCGTCAAAAATGGTAGTCTTGCCGGCACCGGTATCGCCGGTAATCAAATACACGCCGCCGGTACCCAGCTTGGAAAAATCCAGCACCTGCTCCCGAGCGTAAGGGCCAAAGGCGGATAAAGTAAGTTTTAGCGGTCTCATACTTCCTCCTCCCACACACTTTCCATTTGGCTGCGCAAAAAGGCAGCCTGCTCTTCTGTCAGATCCGTGCCGTTTTGGCGGCGGTAAAATTCTGCAAACACATCATACGGCGACTGCTTTTCTGTGGCCGCACCGTCATGCACCTGCCCCAGGGCACGGGTGCGGGCGTTGTCGTAGTCCAGCAGCATTAAGTAAGGATAAATACTGCGCAGGCGACCCATGGCGTCCGGCACATCCTGCTCATCCGTCAGCGTAATATGCAGATAATTCTGCTGAAAATCTCCGTTGGTATAATAGTCTCGGGCGGTCAGTTCCATATAGCTACCCCGCAGCTGCGTTAAATCTCGGCGGGGGCACAGCGGCACCGTGCGCACTTGCAGGTCCCCTTTTGCCCCCAGTTCCACCACGGTCACGCTTTTTTGGTGCCCTGCTTCCGAAAAGGAATACTTCAGCGGGGAGCCACAGTACCGCAGCCGCGGGCTGCCCATATTCTGGGGACGGTGGATATGCCCCAACGCCACATAATCAAAGGGGGCAAACACGCTGCCGTCCACATTGTCCGTACCGCCTACGGACAGTTCCTCCGAGTCCGAGGTGGCAGCGCCGGTAACGAACTGGTGCGTCAGCAGCACATTGCGCCGGGAGGTATCCACCTGCATAGCGCCGACAGCGGCGGACAGTGCATCCGTATAGCTGTCAATCTCCGCCTCAGGAAAATAGCGGCGCACATGAGCGGGCTTCACAAAGGGGAGCATATAAATGCCCACCTCGCCCCATTTATCCGTCAGCACAAACGGCTGCACCCCACCGTCATAAACCGGCGAAAAGTGTACCCCGCTGCCATCCATAAGCCGACTGCCAAAGGCCAGCCGCTCCGGGGAGTCGTGGTTGCCGCTAATGGCAAACACCGGCACCTTTAGCTGCGCCAAATGATAAAAGAAATCGTCGCACAATGCCACAGCCTCCGCCGACGGCACCGCCTTGTCATAAATATCTCCGCAAATCAGCACACCGTCCGGCTGCTCTGAGGCAATGCAGTCAATGATCTGCTGCAGAATATACGCCTGATCCTCCAGCATAGAAAAGCCGTGCACCCGCTTGCCCAGGTGCAGATCGGATAAATGCAAAAACTTCATATCAGTTCTCCTTCATCTGTGCCGCGCACATTAAGTTCACTTTATCATAAACGCAAGGGCATTGCAAGCCGCCGTCCATTTTTTCGCCCGGGTGCAATTTTTTCCATAGAGAATTGATTTTGCGGGAACAGTTCTATATAATGGAAATGAACAGATATAAGGGGGAATCAATATGCACACCATTACCCGCACCACACCCTGCGGTGCACTGCAAGGGCTGGAGCTGGAGGACCACCTGGAGTACCGGGGCATTCGCTACGCCACCGCCGCCCGTTGGGAATATCCCCGACCGGTAGAGCACTGGGAGGGCGTTTACGACGCCACCCAATTCGGTGCCTGCTGCTACCAGCACCGGGGCTTTGACGAGGATACCAAGGTCAATCCTTTTTACAGTAAAGAATTTCGGGTAGGCTGCCATTTCACTTACAGCGAGGACTGCCAGTACCTGAACATTTGGGCGCCTAAGGACGCCAAGGACTGCCCGGTGCTCATTTACATTCACGGGGGCAGCTTTACCGGCGGTTCCACCGACGAGCGCCATATCAGCGGCACCGCTTACGCCAAAAAAGGCGTGATCTTCGTAGCCATGAATTACCGGCTGGGGCCCTATGGCTTTTGCGCCCACCCGCAGCTGAAAGAGGCGGACGGCACCTGTGGCAACTACGGGCTATACGACCAGCTGGAGGCGATCCGCTGGGTGCGCCGCAACATTGCCGCCCTGGGCGGCGACCCTCACCGCATAACGCTGCTGGGGCAAAGCGCCGGGGCGATGAGCGTGGATATTCTCATTTCCTCTCCCCTGTGCCGGGACTGGTACCAAGGCGCCATTATGATGAGCGGACCGGGACTGCAACGGGCAGCCGCACGCCCCCAATCCATTGAAAAGGTGGGTCAGTTCTGGGACCAAATCTGCCAAAACGCCGAGGCAGCGGATATGAACGCCTTGCGCCAAACAGACGCCCGCACCCTGTATTACGCCTGGCTGGACGCCTGTAAAAGCGACAAACTCAGTATGCTCTACACCTTCCCTGTATTTGATGGCAAGCTGCTGACCAAATCCACATTCAATATGCGCACCATACCCAAAATGCCAAAGATCCTGGGCATGACCAACGCGGATATGATTCCGGTCCTTGTGTCCGGTCTGATCCGCCGCTGGGCTCATGACGACAAGGGCAGCCCCTGCTATGCCTATTGTTTTGACCGAGATCTGCCCGGCGACAACTACGGCGCCTGGCACACGGCAGACCTGCTTTATGCCTTTGGCACACTGCAAAACAACTGGCGACCCTTTACCGATACGGACAGGGAGATCTCGCGCCAAATGGTGGCGGCCTTTGCCAACTTTGTCAAGTGCGGCAATCCCAACTGCAACGCCCTGCCCCGCTGGAAAGCAGGCACCGCCAAGGTCATGCGCTTTGGTGACCCCAGCCGCATGGCGCCCTTCCCGGACGGCCGTCTCATTAAAGAAACACTTCATAACAAAGGACCGGTATAAATGAAATTTGACCACAACTTTACCCAAACCACCGCCACACCCACCGGGCGCACTTACGCCGCCGACGGCTGGCAGGCGCAGTTGGACTTTCTCTCCGGCAGCTGCCTGCGAGTGGCGCTCTATCGTAACGCAGATGACCTGCTGCCCACCTTTAATATTGACCCGAACAATGCGTCCATCGGCCCCCAGGGCAGAGCGCGACTGAGTACCGCCGGTTTCCAACCGGCAGCGCCCGCCGTAACGGAGACCGATAGCGGCACCGCCTTTGCCCTGCCTTGCGGGGTAACGGCAGAGCTGGATTTCCACAATCTGCTGCTCACCTACAAGATCGGCGATCGGGTGCTCTTTGCGGATCGAGGGCCGCTGGCCTATAATTTGGACAAAGAGTTTGGCACCGGCGCCACCCACTACATCACGCGGGAGCGGGATGAGCGGATCTACGGCCTGGGCGATAAGGGCGGCAGCGTGAACAAAGCCGGGCGACGCTTTCGCATAGACACAGCGGACAGCATGGGCTTTGACGCCGCCATGACCGACCCTCTCTACAAGCACACGCCCTTTTACATCTGCCAAAACAGCGTGGGCTGCTACGGCATTTTCTATGACACCACGGCCCCCGGTGAGATGGATCTGGGTCGGGAGATCAACAACTACTACCCGCCGTTTAAGTATTATCGCTCTGCTGAAGACTGCCTGGTGTACTATGTATTCTTTGGCAGCAAGTTAGAGATCTTGCAGCAGTTTTGCCGCACAGTGGGGCGCCAGCCGCTGCCCCCCAAGTGGAGCTTTGACTACTGCGCCAGCACCATGGCTTATACGGACGCCCCCAAGTCAGAAGAAAAGATGGACGCGTTCCTTGCCAAAGTGCGGGCGCTGGAGCTGAATTGCAGCGGGTTTTATCTGTCCTCCGGCTACACCGCCATCGGCAACCAGCGCTGCGTGTTCCACTGGAACAGAGAGAAATTCCCGGATCCGGCACGGTTTATCGGTAAATTCAACGCCGCCGGGGTGCACCTGATTCCCAACATCAAGCCGGCGTTCCTAACCAGCCACCCGATGTACGATGACCTGGCGGCCAAGGGTCTGTTTGTCAAGAATGCAGACGGCAGCCCCTATGTTACCCAGTTTTGGGACGGCCTGGGCAGTTACCTGGACTTTACGAACCCGGAGGCCTTTGCTTTTTGGCACGATCAAGTGACGGAAAAACTGCTGCAAAACGGCATGGACGCCACTTGGAACGACAATAACGAATTTGACATTCAGGACCCTACCGCTGTGGCTGTGGGCTTTGGCGGCAAGGCGGCCCCGGCTGCCCATATTCGCCCGGCGCTCACCTACTTAATGGTGCTCAGTTCCTATCAGGCTCAAATGGAAATGCGCCCGGCAGAACGGCCGTTCCTTTCCACCCGCAGTGCCGGGATCGGTCTGCGACGGTTGGCTCAAACCTGGAGCGGTGACAACTATACATCCTTCCACGATCTGCGGTACTGTCACTATGTAGGCATGACCCTGAGCCTGTCCGGCTTTTACTTTTACGGCCACGATCTGGGCGGCTTTTCCGGGGAAATGCCTTCCAAGGAGCTGCTGCTGCGTTGGATTCAGCACGGTGTATTTGAGCCCCGCTTTACCATTCATTCCTGGAACGCGGACGGCTCCGCCACCATGCCTTGGAGCTATCCGGAGGTGATGGACAGTGTGCATGCCCTGTTTGACCAGCGTAAGGCTCTGCTGCCTTACTATTACAGCACCGCCTACCGCAGCGTGCAGGAGGAGCTGCCCTTGCAAGCGCCCCTGTGTCTTTATTATGACGACCGGCAAATCCATCCGGATGATCCTGCGTTTTTGCTGGGGCGCGACCTGCTGGCAGCCTGCGTGCTGGATCCGGGCATGGAGGATATAGAAGTCTACTTGCCGTCCGGTGAGATCTGGTACAAGGACGACCGGTGTTACACCGGCGGGCAAACAGTGGCACTGCACATTCCCGCTACCGGCACCGTGCCCTATTTTGTGCGTGGCGGCTGCGTATTCCCTCTGGACATTGGGCCTACCGGGTTCCAAAAGCCCAGTCAGGTACAGTTCACCGTTTATCCCATTGCCGACGGCACCTTCCAAAGCCGCTACTTTGATGATGACGGCCACACCTATGCCTACCGGGACGGCCACTGCGTGGACGCGGTCTTTACCGTTGCTTGTGCTGCAGATACCGTTACCGTGCAGGTAGAGAACCGGGGCGACACCCCCTTTGCACCGAACATTTGCCTAACCCCGGCAGACCACCGGCAGCTAATTATCAAGTAAATCCAAACATAAAGCAGTCGATAAAAATCGGCTGCTTTTTTTACGGAAATCAAAAAAAGTTCAAAAAAGTCTTGACTTAGAGTCAACTCAAAGGTATATACTACCCTTGAAACGAGGTGAGCCTATGACCATTAAAGAAGTCAGCGAAAAGTACAACATTTCCCAAGACACCCTGCGCTACTACGAGCGGGTGGGTATGATCCCCCAGGTGCACCGCACAGGCGGCGGCATTCGGGATTATCAAGAGGACGATCTTGGCTGGGTAGAACTGGCCATTTGTATGCGCAGCGCCGGTCTGCCGGTAGAGGTGATGATCGAGTATGTGCGGCTCTATATGCAGGGCGACAGCACCATTCCCGCCCGGCTGCAACTGCTGCTGGACCAAAAAGCCGCACTGGAGGCCCAAATGGCAGACACGCAGCGTATGCTGGACAAATTGGAGTACAAGATCTCTCGCTACCGGGCGGCGGTAAAAACCGGCAAGCTCACCTGGAATTAACAAAAGGAGAAAACGCAAAATGTATTTGGAAAAGATCAACGGCCCTGCCGATGTAAAAGCCTTAAACAGCCCAGAGCGCACCGTCCTGGCGGCAGAAATGCGCACCGCGCTGATTCAAAAACTCAGCCGTCACGGCGGCCACTGCGGTCCTAATCTGGGGCTGGTGGAGGCCACCATTGCCCTGCACACGGTGTTTGACTCCCCCAAGGACCGGTTTGTCTTTGATGTGTCTCACCAGACCTATCCCCATAAGATGCTTACCGGGCGCAGCTACGGCTTCTTAGACCCGGCCCGGTATGACGATATTACCGGGTACAGCGCGCCCCAGGAGAGCGCCCACGACCCCTTTACGCTGGGCCACACCTCCACCTCCGTCAGCCTGGCCTGCGGCTTGGCAAAGGCACGGGACGCCAAAGGCGAGCACCACAATGTGGTGGCCATTATCGGCGACGGCTCTCTGTCCGGCGGCGAGGCACTGGAGGGGCTGGACCTGGCCGGCGAGATGAACAGCAATCTGATCATCGTGGTCAACGACAACGGTATGTCCATTGCAGAGAACCACGGCGGCATTTATAAAAATTTGGAGCTGCTGCGCCAAACCGGCGGCAAGGCAGAGTGCAACCTGTTCCGCGCTATGGGGCTTGATTATGTATTCCAGCCGGAGGGCAACAACACAGACGCGCTGATTGAGACCTTTCAGCAGGTCAAGGACTGCGACCACCCGGTAGTGGTGCACATTGTCACCGAGAAAGGCAAGGGCTACGCCCCGGCAGAGACCCACAAGGAGAACTGGCACTGGTGCATGCCCTTCGACCCTAAAACCGGCGAGAGCACAGTGCACTTTGAGGGCGAGGACTACGGCGATCTGACCGCCCGGTATCTGCTGGGGGAAATGCAAAAGGACCCCAAAGTGGTGGCCATCACCTCCGGCACCCCCACCGTATTCGGCTTTACCGAGGAGCTGCGTAAGCAGGCAGGCAAACAATTCATGGATGTGGGCATTGCCGAGGAGACCGCCGTAGCGCTGGCCAGCGGACTGGCTGCCGGCGGTGCCAAGCCGGTGTATGGCGTGTACAGCACCTTTTTGCAGCGCACCTACGACCAGTTGAGCCAGGACCTGTGCATCAATAACAACCCGGCCACCCTGCTGGTGTTCGCCGCCTCTGTGTACGGTATGAACGATGTGACCCACCTGGGCATCTTTGACATTCCCATGATCTCTAACATTCCCAATCTGGTGTACCTAGCCCCCACCACCAAGGAGGAGTATTTTGCCATGCTGCACTGGAGCATGACTCAACGGGAGCACCCGGTGGCTATTCGCGTACCGGCCTGCGGCGTACTCTCCCACGGCAAGGCAGTCACCAAGGACTTTGGCAAGCTGAACACCTATGAAGTGACCCAGGCGGGCAGCGATGTGGCCTTTATCGGCCTGGGCAGCTTTTATCCCCTGGCACAGCAAGCGGCTGCGGAATATGAAAAGCGCACCGGTGTGCGCCCCACGGTGATCAACCCCTACTATATCACCGGGCTGGACAAGAAACTGCTGGCCCAGCTGAGCAAGATCCATAAAACCGTAGTCACCCTGGAGGACGGCGTGCTGGACGGCGGCTTTGGCCAAAAAATCGCAGCCTACTACGGCGGAACAGACACCAAGGTGCTGTGCTACGGCCTGCAAAAAGAATTCCTGGATCGCTACGATGTGCAGTCGGTGCTGGAAGAAAACCGCCTAACCGCCGTACAAATTAGCGACGATCTGCAAAACCTGTAAGGAAAACGAAAATGGCAAAAACTTTGGTCGTCTATTATTCTCAATCCCGGGGCAATACCAAGAAGACCGCCCGGGAGATCGCGTCCACCCTGGGCGGCGACCGCCAGGAGACCCCCATGCCCGCCGTCACCGCCTGGGCAGAAAAGCTGAAATAACCGGCCATACCAAAACGACCCGCCGACTTTTGCCGGCGGGTTTTATTTTATGGTGGATATTTGGCTGCGGGTTTGCTATAATAGAGATAAGATCAAGGAAAGGAAGTGCAACGATGCCTTATATTAAGAATGTACCTCATGAGGCGATTTTCAGTCTTGCGGATCAAGTCCGGGTGCAGCCCGGCCAGGTGGTCAGCAAAACCCTGGCGCAGAATGACGCCGTCAGCGTGACCCTGTTTGCCTTTGCAGCCGGTGAGGAGATCGGCACTCATGATTCCACCGGCGACGCTATGGTTACCGTGCTGGAGGGTGTGGGTCAGTTCACCATAGACGGTGTGCCCTACCTGGTAAAACCCGGCGAGGCGCTGGTGATGCCCGCCAAAAAGCCCCATTCGGTGTACGCCCCGGAGAATTTCAAGTGGCTGCTGACCGTCATCTTCCCTCACAACAACTAAATACCCATAAAAAGGACCGACGGCTGCATACCATCGGTCCTTTTTTATACAGACTATATGTGATCGCCCATATTGGACAGCTCTGTGAAATCCTCTATGTACCATTCTCCGTCCTCTCCGGGCGAAAACCGCCAACCGAAATCCGTTACGGTTTGGTCGATATATCCGTCATAATACACAGCTTTTAAAATCAGGCAATCGCCGGAGGGGCAATAATCATCGCCCATAAAAATCAAACGCTGTAAAACCAACTTGTGGCTAAACCCGGAGAATTGCGCCTTTGCTAAAGCAGCGCACGCATCAATATCTGCTCTTGTATAGCGCGCAGAAGTACCGTAATCGATCTGTACATCTGACACATCCGCCTTTTGATTTTTCATTTGGCACCCGGTAAAAATCAACACCAGCAAAATCAAACACGCCAGCGCCTGGGATGTTGCACAAACACGATTTTTCACATCGTTCACCTCTTTCAGCCTCAATATAACACGCCAAAGCGCTTCTTGTCAAGGCAGCCGGTCAACCGCAATATGTATCTTCCGTGTCAGCTAAGAGGCGTAAATGCCCGCCATCAAAATAATAGATATCCTCTTTCTTAAACCCATAAGTGCCGTTGATCAGCGCAATGTGCGGTTCAAAAGTGAAAAGACGCACCCGGCTCAATTTTTTGTGATTGCCGGCTTGAATATAAATACGGTGATTTTTGTTTTTCACAATAGAGTGACCCAAATTGCCGTTAAAATCCAAATTATGATACCCTTGTGCACGAATGTAATCGTTCATATACGCATAAAGCTGCTCAAAGGTCGTATTTCTATCTACAAAGCGTCTCAATTCCGCGTGCAACTGATTCTCAAAGCGTAGGCCATTGCGGATTTCCGCTTCTCTAATATCATCTAATCGCCGAACTACCTGCCCATTTTGCACAACAAATGTCCGGGCAAAATCGCCCCAGATCCGCCGCCGTTGCGGCGACAGATCAATGGTGATTATATCATTTGACTGAATACAGGTATGCGCCGGCACATACTCCCGACCGGACACAGAAAGCAGCGTATCCGGGTGATGAAAAACCAAAGCACCTACATCGTAGTACCAAAACGATTGCGCACCATGGGCCAACATATAGGTTTCGCACAAGGTCTTGATCTGATCCACAGTCTGACCCACCTGTATATAGCTTTGAATAAATTGCATGGTATCCGCAGCAAGCTGCTGCATAGCGGCATATTTTTGAAGTGTAGAACGAAGCATCATCATACCTCTCATAAGTATACAAAAACAGCCCGACAAGGAACCTTACCGGGCTGCATTTTTGATTTATTTCTTCTGAGGGCCGTTGTAGCCGTTCTTTTCCTGGAAAGCGGCGATCTTGTCGATCACGCCAAGGATCACATCAAAGCCGTCGCCTACAGTCTCCATCTCAAACCGCTCCGGCATATCCCGCCAGGTGTGGTAATAATAGGTAAGCATGGGGTTCTGGGCCGCAAAGGTCACGGACTTGATACCCGCGCGGGTCATAGGTGTAGAGTCGCAGCCGCCAACGGGATTGTGGATACAACCGTTTGTCTTGCTCTCGATACCCATCTCGTTAAAGGTGTCCTTAAACATCTTTTCCATATCCGTATCAAAGCGCACGCCCTGCCAGTCGTCCTTGATCACCACTTCAAAATACTCTTTATCTGCCACAGAGTCAATGTTAATGTTCCAGGCGTTCTGGGACAGATCGTCAAAGCGGTGCTCCTGGGCAAAGTGCATGGAGCCGCGTAGACCCGCCTCCTCAGAGCCGATATTGGCGTCTACAATGCGGCAGTTCTTAGGCATCTTTTCCGGGTGCTCCTTGAAATACTTGATCACCGCATAGCTCAGGCCGATGCCGGTGGCATTATCCATAGCGCCGCGAGAAGCGTTGCGGGGATTGGGATCGCCCCACATCACCACAAACAGAGAACCGATGGCGGTGACGATGGGCACGAAGTTCATAATGAACATAAAGGTGTTCCAGCCCTGAGAGGCCAGCATGGTCTGTGCCCACTGGGCGCCGGCGTAATCGCAAATGTTCACGACAGCCATAAACACAGAAAACAGCGCAATAAAGAAAAAGCAAACCGCGCCGAAGCCCACCTTGCCATATGTAGCGATCAGGCCCATAATCGGCTTGGTCTTGGCATACTTATATGCGTGCTCACTGTGGCGCCAGCACCAGGACGTATCCGTATGGCCGGACAGGATAATGGTATAGTCATACTTGCCGTCCTCCGGCTCCAGCACGCCAAGGGTATTGCGGCTGATCTCCTGGGGGAAGAACATATCAAACCAGGTCTTGTAGAAAAAGCAGCTCATCACCAGCCAAAAGATCGTAATGAGACCCAGCGCAGCCAGGGCGTACCACAGCTTATTAAAGCCGCTGGCCAGGGCGATAATGGCGCCGATACTCAGGATCACGCCGGACCAACCTGCATAGGACAGACCGCCGATACCGGAACGGGGTGAAACGGCGAACTCCTCCGTCTTCGGTTCAATGCCGATGTCGCGCAGCTTGTCGCCCATATACTGATGGAACTTGATTTCACCGTCGGAGCCGGGCAAGCGGGAGCCGATCTTGTGTGCGGCGTGTTCCACAATGTCCATAGCTTCGCGGGCATAGGATTTGGATTCTTCTCTCATGTTCAGGCCTCCTGTTCATAATTTGAAAAAAGATAATTATATTTTAAGATAACTCTGACAAAAATGCAAGCAGAAATTCATGACCTTGCATAAATATTCGCCAAATTCAGGAAATTGTAGCGTAGCACAGCGTTAAAGCAGTACAGCACAGAAAAAAAGCGGCAGCATTTGCTACCGCTTCGAACTGTGGAGACGTCGTGCCGAACCCGATTCTTTTAGCAGAGAATGTCATGGCCGCGGTTTTCTCTCTCAAATATAGGACTGAAAAACGCTCTATCCCCTGCCAAAATACAATAGCAACGCCAAGAGCAAAGCAGCCAACGCCCACAGGGTCACGCACAGCGCCGCCGTCCACACCCGGCACCGACGGAATGTGCGCACACGATTCCCCGGGCGCACCGCTGCCGCCAGTACCGTTTGGATATGCGTATCCCCCAGGGTATGGGGCACCGGCGGAAAATGTACCACCCGGTCCACCGCAGCCAGCAGCCGATTGACCCCACGGCTGCTGTAAGGGGTGGCCACCACCACCGGGCACCCCAGCCCGGCAGACAACGCTGCCGGGTCAATAATAACACCGCGCCGCCGGGCGGCACCCCTATCCGTGATGTACACCACCAACCGATGACTGCGCTGCCAAAGGGCAGGCAACGCCGCCAGTGCCCGCTGCAGATCCAGCGCCGGGGTCACCAGCACCGTACAGTCCGCCCCGCGCAGCGCCGGACTTTGCAGAGCACACAGAGGCAGCAGCCGCAAATCATAAGTAATATGCCGGTACGAATAACACCAGGCACCCCCCTGCCGCCGCCCCAAAAGCTCCTGCAGCAAATGCTCCTTACCCCCATTGTTGCCGCCCACCAATACCACGGTACACTCGCCCATATTACCCCTTCTTTGCCGTTATTTCTTACCCATTCTATGCAGGCGTCGATCAAATGTGACGGCAAGCGTACTTTTGTTCAATTTAGGCCGTTCTCAACGGCTGGGTATTGATTTTGGCGTAGGGGCTGTGGTACAATGAATATGTAAAATTATACTCCGCTTTGCGGCGGGGAGGATAAGAGAGGTAAAATCTATGGCAGAAAAGCTAAAGTATTTTGTAAACGGTCAGTTCCGTGAGTCCAAGACGGACAAATGGTACGACCTGCACAATCCGTCCACCGGCGAAATCACTGGCCAGGCGCCCTGCTGCACCAACGATGAGGTGCTGGAGGCCATTGCGGCCGCCAAAGCTGCCTATCCGGGCTGGAGCGCCACCCCGGCCATTAAGCGGGCACAGATTCTATATAGAGTGCGGGAATTGATCCTGGAGCGCATGGATGAACTGACCATGAGTGTTGCCAAGGAAAACGGCAAAGTTTGGGCAGAATCCGAGGGAGATGTGCTCAAGGCAAAAGAAGGCACGGAGCTGGCCACCCAGGTACCGTCCCTGATGATGGGTGAGTCCATTATGGACGCCTCCCGCGGGTATGATACCGTGAAATACAGAGAGCCGCTGGGCGTGTTTGCCGGCATTGTGCCTGTAAACTTCCCGGCCATGATCCCCTTTGGCTGGATGGCACCCACCTGTATTGCCACCGGCAACACCCTGGTACTGAAAGCCGCTTCCTTGACCCCCAAGACCGCCATGCTCTTTGCCCAGCTGTACAAGGACGCAGGCGTGCCGGACGGTGTCATCAATGTGGTCACCTGCTCTCGCAATGAGATCAACACCATTCTGGAGCACCCGGATGTTAAGGGCATTACCTTTGTTGGCTCCACCCCGGTGGGTCTGAAAATCTATGAAAAAGCCGCTGCCAACGGCAAGCGCTGCCAGGCCCTGTGCCAGGCCAAGAACCATGCCCTGGTGATGGAGGACTGCGCCTTAGAGCGTACGGTAGCCGGCGTGATCAACTCTGCATTCGGCTGTGCCGGTCAGCGTTGCATGGCGCTGTCCTGCTGCGTGGTACAGGACAGCATTGCAGACGCCTTTGTAGCCGAGCTGAAAAAGCAGGCGGAGAAAGTGAACTGCGGCCCCGCCTGGGACAAGAGCTCCCGCCTGGGTCCCATCACTTACGAAAAGCATTATAAAGAGGTACTGGCCGATATTGACAAGGGCGTAGCCGAGGGTGCCACCCTGGTGTTGGACGGCCGTAACACCGTTGTGGAGGGCTACGAGAACGGTTACTTTGTAGGCCCCACCATCTTTGACCATGTAACGGCAGATATGACCATCGGCGACGAAGAGGTCTTTGGTCCGGTGCTATGCATCAAACGGTGCAAGGACTTTGAGGAGGGCTTGGCCATTATGAACGCCAACCCCTATGCCAACGGCTCCGTGATCTACACCCAGAGCGGCTATTATGCCCGGGAGTTTGCCCGCCGTACCGACGGTGGCCAGGTCGGCATCAACGTGGGTATTCCGGTACCGGTAGGCTTTATCCCCTTCAGCGGGCACAAAAAGTCCTTCTTCGGCGACCTGCATTGCCTGGGTAAGGACGCTTATCGCTTCTACACAGAGAGCAAGGCGGTCACCACCCACTGGTTCGATGAGGAGGAGAAAAAGGCAACGGAAGTCTCCACCTGGGACGGCACCATCTAAGCCGGATAAACAGCAAGAGCACACCGATTATGGTGTGCTCTTTTCTTATACTTTCTTTTATCCGTTCTCTTTGTCCGTGCCAAACAGGCCCTGACTTTCGCCGCATGTATCAGTGCGCCGAGCGCCGGAGCCGTCGGCTATATATTATACTACAAAACAGCCAAAACCTCAATACTTTTTCTTTCTCTCTCGGTGGTGTATAATATGGGTACAGAGGTATGCCTCTGAATTCCCAAAGGGGTGATAGTATGATCAACATTACGGCAAGAGGATTTGACCTAAAGCAAGGCACTAAAGACGGTATTGACAAAGAACTGCAGCGTATTGAAAAAATGCTGCCTGACAACGCCTCCTTTGATGTGACCTTAGCCAAGGTAAAGGACGGCTACAAGTGCGACATTACAGTCAAGTACATTGGCTCCTTTATCCGCGGCGAGGCACGAGCAGACAAGATTGAGCCGGTCATTGATATGGCAGTAGATGACCTGAAGCGAAAGCTGCGCAAGCTAAAGACCTACCTGGTCGATAAGAAGCGTAAGGGCGGCATTGACCAGATCGCCTCCATGCTGGAGCCCATAGAAGAAGTGACCATGGACGACTTTGAGAGCTATGACAGCTCCGCTGCGGATATTCAGCGCAAAAAGAACATTCATTTGCAAATGATGACCGACGATGAGGCCATCGTGCAAATGGAAATGCTGGGACACAGCTTCTTTGTTTATCTGGCGCCGAACGGCCAAACCTGCGTGATCTACAAACGAGGCAAAGGCTACGGTCAGTTAATTTGTAGCTGACCGGCGCACACCGAAAAACGCATTTTTATTCAATTTTGCCGTGAGTGAAAACTCACGGCAATCTTTTTTGTGCAAAGTGGAAAAATAGATACGCGTACATTGACTAATACCTATGATATTGGTATAATTTATACAAAAATAAACGGAAGCAACGCTTCTGAAGAGAGGGATTTTGTATGACTTATACAGAAAAAGTGCTGGCAGATCTGAAAGCAAAGAACCCGGATCAGCCGGAATTTATCCAGGCCGCCACAGAGGTTTTAGACGCATTGGCGCCGGTGGTCAACAACGATCCGAAATACCAAAAAACCAGCTTGTTGGAGCGGTTGGTTGAGCCGGAACGACAGATCATGTTCCGTATTCCGTGGGTGGACGATCATGGCCAGGTGCATGTAAACCGCGGCTACCGCGTGCAGTTTAACTCTGCCATCGGCCCCTACAAAGGCGGTCTGCGCCTGCACCCCAGCGTAAACCTGTCTATCATCAAGTTTTTGGGCTTTGAGCAGATCTTCAAAAACAGCCTGACCGGCCTGCCCATCGGCGGCGCCAAGGGCGGCTCTGACTTCGACCCCAAGGGCAAGAGCGATATGGAAGTGATGCGCTTCTGCCAGGCATTTATGAATGAGCTGTATAAATATGTAGGTGCGGACGAGGATGTACCCGCCGGCGACATCGGCACCGGTGCCCGCGAGGTAGGTTACTTATACGGTCAGTACAAGAAACTGACGAACCGCTCCGAGGGCGTGCTCACCGGTAAGGGTCTGAGCTTCGGCGGCTCCCTGGCTCGTACTGAGGCTACCGGCTACGGCCTGGTGTATATTACCGAGGAAATGCTCAAGGACCACAATAAGGATCTTAAAGGTGCTCGTGTGGCCGTGTCCGGCTCCGGTAATGTGGCTATTTACGCCATGGAGAAGGCTCGGCAGTTAGGTGCAAAAGTCATCTGCTGCTCCGATTCTACCGGCTACGTGATTGACGAAAACGGCATTGATGTAGAGGCTGTAAAGCAGATTAAGGAAGTAGACAGAAAGCGCATTTCTGTGTATGCTGAGAGCCACCCCACCGCCGCTTATGCAGAGGGCTCTGTGTGGGACGCCGTGACCTGCGATGTGGCGCTCCCCTGCGCCACCCAGAATGAGATCCACGCCGCGCAGGCGCAGCGCCTGGTAGACACCGGCTGCTACGCAGTGTGTGAGGGCGCCAATATGCCCACGGACGCAGCGGCCACAGAGGTGTTCCTGCAAAATCACATTTTGTTCCTGCCCGGCAAAGCTTCCAACGCCGGCGGCGTAGCCACCTCCGCACTGGAGATGGGCCAGAACTCCATTCGCTCCAGCTGGACTTTTGACGAGGTAGACGCCAAGCTGCAAGGCATTATGGTCAACATCTACCACAACATGAAAGAGGCTTGTGAAAAGTACAATGCCCGCGACAACTTCGTTGTTGGTGCCAACATCGCCGGCTTTATGAAAGTGGCCGATGCCATGATGGCGCAAGGCGTGGTTTGATCCAACAAATCTCATATAAACACAAAGCAGTCTGCTACGGCAGGCTGCTTTTTCTTATTGACAAAGAAGCAAACCTGTGTTATGCTTTATACATACCATTGGTATGTAAGGAGGAGCTATGAGCAGGAATAAATACCCGGAACAGACCCGGGAACAAATTTTAGATACCGCCACACGCCTGTTTTTGCAGCAGGGGTACGAACACACCACCATACAGAATATCATCGACCAGCTGGGCGGCTTGACCAAAGGCGCGGTGTACCACCATTTTTCCTCCAAGGAAGCAATCTTAAACGCCGTTGCCGCCCGTATTTTTGAGAACAATTCCCTGTCCGCCACTTGGCAAAAAATCGCAGCATCCACAACATTAACCGGCAGTCAAAAGCTGACCCAAATGCTGCTCGCTGCCATTACAGACCCACAGGAAGCCCAATTCCGCAAACTGGGTGTGCAACTGCGTAACTCTCCCCAAATGCTGCGCGACTTGCTGTATCGCAGCGTAGAAGAAATTGCGCCTACCGCCTTTTTGCCGGTGGTCGAAGCGGGCATTGCCGACGGTTCGCTGCAAGTGGCCGAACCGACAGCCTTTGCAGAAGTGGTGGCGCTGCTTGCCAATCTTTGGCTAAGCCCGCTGGTATTTGCTGATGGCCCGGAAAAGCGGAAGCAAAAGCTGGCATTTCTCTGTACCCTTTGCGAACCCACCGGGCTGGACTTAGCGCCCTTGCAACCTTATTTAGATCAATTATAAACGCCCATTCGCCCGCTGCTTTGCAGCGGCTATTCTTTGAATTTATACATACCGTTGGTATGTAAGGAGGAAATATGGACACTTACACAAAAAGAGAACGGACCATCTATCTACTGGGTATGCTGGGTCAAAACTTGATATACGGCGTGATCGGCACCGGGCTGACCTACTATTTTCAAAGTGTGATCTTTTTGCCTGCACTGGCCATCAGCACCATCACCCTGCTATCTAAAATAGCCGAATTCCTGTGTGATCCCTATGTGGGTATGCGCATTGACCGCAGTCAAAATACCAAAGGCAAATGCCGCACTTATCTTATATTTTCGCCGCTGCCGATTTTTATTTTTTCGCTGCTCTGCTTTCTTAATCGTCCATATACGGCAGCAGAAACATCCACCGCCCGCCTGGGTATCTTACTGGCTGCCGGGCTTAGTTTCATCGGCTTTGGCATTTGCTTTTGCTTCGGCGACGTAGCGCTATGGACATTGCCAAACTTAATGACGAAAAGCCGCAAGGACCGCAACGCATTGCTGGCACAGGCACGGATCGTTGCAGGAATTTGCGGTGCCGGTATCAGTTTGCTGCTATTGCCGTTATCTCAGGCTGCGGGCAATCACTTTTCCAAACAGCTAAACGACCCTACCTTAGGGCTGCAAATGGGAACCGTCTTGGTCTGTGGCAGTATTTTGCTCCTAGGCATGCTCCTGTTTCAGCCGGTAGGCTTTTGCACCCGGGAGCGCGTGACCGCTCCACCGGCAGAAAAGCGCAGCCTATGGCAAAATCTTACGGAAATGTGGCGCATGCAAAGTTATCGTCGCATTTTGCTCTCCGGATTGCTGCGCACACCTAGCGGGCTAATGAATTTGCTGCAAATGACCGTGCTGTCTTACTACTTTGGCAATAACGGGCGCACACCTTATGTGCACTATATGCTGCTCTTAGGCATTCCGGCCTTTTTAGGCCAACTCATCGCCGCAGGTGCAGCTCCCAAACTGGCAGACAAGCACGGCGCAGCCACCACATTTGCACAAGCCAATGTGTTTGCAGGACTGGCTTTATTGGCCGCCTTTGCGCTGTTCCTTTGCCGACCGCAGCAGCTAACACAAGCCCTGCCCTTTACGCTCTTGATCCTGCTTCTGTTTTGTAATATGTTTTGCTGCGGTCTGGTCAATACCGTGCAATCCATTTTAATTGCAGACGCAGCAGACCTAACGGAGAAAGAAAGCGGCATACGCCGGGACGGCATTTTTGTGTCCGGGCAATCCTTACTCATCAAGCTGTCCACCGGTGTGTCTGCTTTGCTGCAAGGGCTGGTGTTTGCGATCAGTGGCTTTAGCGGAACCGCCGTCCGTCAAATCAACCGGGCGCTATATGCCGGTGCCGACTTCGCAACGGATCCGTCATTTGCAACGCCGCGCTTCGCTATGTTCTTTTTATTTCTGTGCCTGCCGGGGATCGCCTATCTGCTTTCTGCGCTGCCGTACAGGAAAGGCAGAAATCCACATAAGGCACCTGTATAAGCGCCCTCTATACGTTGTTCACATCAAAATCTATACAAAAAAGCGCAACCCTATGGGTTGCGCTTTTATATTTTGCCTATGTGCTCCGCTATGGATCTTCTCAGCATAAAAAGCCCTCTGAAAAATACGGAGGTGCTCCAAACAGAGTGCCTCCCATATTCTTTGCTATTTCTTTTTACAGTGCAGCGATGAGCGCTTCCATTTGGTCCATTTTGCGCTCCATATCCGCCACCAGGGCAAACTGGTTGCGGGCGCGCACCAGGTTATGCTCCGGGTAAGCGGTCTTAAAGTAGGTGTCGCCGTTCAGGTAATCGGTCAAAAAGCGCATACCGCACTCAAAGGTCATCAACTGGGCAGAAAAGGCCAACTGGTCGATCTCCGTTTGAGTCAGGCTCTCCCCTGCCTGGGACAAAAAGCCCTTGGCATAGGCACCGAAATACTCCAGATCCAAACTCACCTTGGACAGGTCAGCCTCGTCCTCGGCAGCGGTATTGGCGCCAAAGCGAATAGAGTCGCCAAAATCATAATGGGCAAGACCCGGCATGACCGTGTCCAGGTCGATCACACAAATGGCCTCGCCGGCGGTGGCATCAAACAGCACATTATTCAGCTTGGTATCATTATGGGTCACCCGCAGGGGCAACTGACCGGCAGCCGCCAGGTCGCTAAGCCGATGGGTGTCTGCCTTGCGGTCCTTTACAAACTGAATTTCCGCCTGCACAGCGGCGGCACGACCGGCCTTGTCCGCTTCTACCGCCGGGAGAAACTCGTTCTCATACCGCCACAGGGTGTTATGGAAATTAGGAATCGTCTCATACAAAGTCTCAGCCGGAAAATCCGCCAGCAGGTGCTGGAACCGGCCAAATGCCTCGCCGCTCTTTTGGAACAGAGCTGCGCTCTCCACCGCGTCATAGCTGATAGAGTCCTTTACAAACACATAGGCGCGGAAGTAGTCCCCATCCGGTGCAGTGTAATACTGCGCGCCATCCTTGGTCTTGATAAAGTGCAGGGTCTCCCGGTCCGGGTCGCCGCCGGCAGCCCGAATCTTCTCCTGCAAAAAGGAAGTGACTGCAAACACATTCTGCATCAGCCGGTCAATGTCACGAAATACATTGTGATTGACCTTCTGCAGCACGTACCGCTGCTGACCGCCCTCCGGCAGATCGGTGGTAATGATATAGGTTGTATTGATATGGCCATTGCCAAAGACCCGACAATCCGCCGTCTTGCCCTGAAAATCAAAGCGGTCGATCACCTGCTGAATACTCTCCATACAAGGGTCCTCCCTTATTCTTGCGCGTACGCTCAAAATGTCCTTTTATTTTACACTATTATGCCATCTTTTTCAATACCTAAAATAAAGACCGTATCAACTATGCCAGTCGATACGGTCTTACTTTGTATAAATTTTGACTTACTCTCGGCGCAGCGCCTCAATAGGCGACAGCTTAGCAGCCTTGCGGGCCGGGTAAATGCCGAAGAACAACCCAACACCGCTGGAGAATGCCAGTGCCAGCAGAATCACCCACCAAGTGATCTTGGGGGTAATATTGATAACGGCACAGGCCGCATACGCACCTGCAATACCCAATACCAGGCCAATGATACCGCCGATCAAGCACAAAATCACCGATTCGGTTAGAAACTGCAAGGTAATTACCTTGGTCTTGGCACCCAAGGACTTTCGTATGCCGATCTCCCGCGTTCGCTCGGTTACGGACACCAGCATAATGTTCATCACGCCGATACCGCCAACGATTAGGGAAATGGCACCTACACAGGCAATAAATGCGGTCAGCACCTGCATAACAATATCTACGATCTGAATATAGGTGGCCATATTCTGGGCAATATACATATTCTTGGCAAAATTGCCGTGGGCCGCTTTCAAGTAGTTGACGGTGGCATTACCTACAGCGTCATTGTCTGCACCGTCCTGGGCGATCACGAAAATGGAGCTCAGGTTGGAGTTGGCGCCGGTGATCTGGGTCAGCGTCGTGCATGGCATAAACAATGCGATCACAGGAGAGTCCTCGTTCTGCTGAAACATAGTGGACAGAGAGGAACTGCCGCCGGCGGACTGAGCAATCTGGTCAATATTGGCCACACCCACTACCTTGACCTTCATGGACTTACCGCTGGAGGACACAGTCACATACTCGCCGGTCACATCTTCATACCCAAATACACTTTGAGCACTGTTAATACCGATCACGGCAATAGGCGAATTGGCGCTGTACTCCTCATCGGTAAAGAACCGACCGTAGGTGCAGCCTTCGGTCAAGGCGTACTGAATATCACTGTTTACGCCAACCAGCATGGCAGTAGCTTCCTTGGCCTGGGAGTCAATGGTGGCCTTACCAAAGCCCATCAGCATAGGCGAGCAGCGATCTACGCCGTTTACACGGCTTTTAATATTCTCTACATCCTTCAAGGTAATGTAGTCGTTGTCCGTAGCCTGGGTGGTATCCACCGAGACCATCACGGCGTTGGAGCCCATATCCTCGATTAAAGAGACAATATAGTCCCGGGCACCGGTACCGGCTCCCACAATCATGATCACAGAGCTGATACCGATAATGATACCCAACATCGTCAGGAGCGAGCGCATCCAGTTCGCCTTTATGGCTTTGACAGCGATTTTAAAGCTTTCTGAAATGTTCACAAAAAGTGCTCCTTATTTCGTTGTACTCAGTTTGTCAACCACCTTAACCTTAAAGGAATCTTCCTTATAGGTAGTGGATGGTGCGGCAACGATCTTGTCCCCGGCTTTCAGGCCGTCGGTTACCTGGTATGCGCTGTCCGACATGGCGCCGGTGGTAATGGCGGTCTTGGTGACCGTCTTTTCCTCCTCGTTGTAGAGGTACACATAGGTGCCGGTCTTATCCAGCACAATCGAGCCGGTGGGCACAGTTACAACGCCCAGGTACTCACCGGTGCTAATCACCACATTGGCTTCAAAACCGATGATAATGTTCTCGTCCGGATGTTTCACTTCTACCGTACACTCCACGCCTGCACCGGAGCTGGTCAGACTGGACAGGCCGCTGATGCCGGCCATGGAGCCTACATTGTCCAAGATGGAGCCGGCAGATCCGCCGGTGGCGGTAGGCGCCTTGGCCGTCACCTCGCCCTCATACTTACCGTAAGCGGTGGTAATGGTACAGGGCATACCCACCTTCACCCGATGGTTATCGTACTCACTCAGGCTGATGGTCACGACCATGGTGTTCATATTCTCCAACACAATACCGTCATTGACCAAAGAAGTCTGCTCCCCGGCTACCAGATCACAGGTGGTGATGGTACCGTCAAAAGAAGCGGTCCAACCGGCCTGTAAATCCTTGTTTGCGTCCTGCAAAGCGGTCAGGGCACTCTCTGCACCCTCCATTACGCTCTTTTGTGCGCTGACAGCGGTGTCGGAAGCCTCTACCGCATACATTTTGGACTGCGCATACAGGGCAGCCAATTGCAGCTGCTTAGTGGTCAACTGTATATCCGTCGTACTGGTCAGGTCTTTTGCAACGCTCTTCCAGTCAATTTCCTTTACAGCCTGAGCAATACTCTTTGCCAGCACATCGCCCATCACTTTCAGATTGTCCTCGTTAATCAAGCCGTCGCTGATGGCGTCACGAATGGCCTTTTCCACCGCGTTGGCGATGGCGTTGCCATCGGTAATATTTCTATCCAACGCCTTACTGATGGCGTCCGCTGTGGTCTTCATGATCTGCAGCATGGTATCCACATCATTGGTCATATCGCGAATATTATCGGCAATCTCGGCCAAGGTATCGGACAGATCCTTGAGCGCACCGGTGGTGCTGGTCTTCTCAAACTGCGCAATATACTGCACATTACCACGCACCTGAACAGTCACCTGCTTGGAGGACTTCAATTTGGTGCCGTTGGCATCGTACCAACCGGAGAAGCTGTAATCCTTGACAGGAACAGCCTTGATCACCACATCTGCACCCTCGTCATACTTACCTGCACTGGTAGAACCGGCGGTATTATTACCCACCTGCACGGTACCGTAGCTCTCCTGGCCGGCCAGCACCGTTGCCTTTACCGTATAGGTAGCGGCCTTAGCAGTGGTTGCTTTGGTGGTAGTCACCCGTGTTGTGGGAACTGTGGTCGGCAGCGTGGTGCGGTGTTTTTTCGTTGTGGTCTTCTTCTTTGAGGTAGTGGTGTTGGCACGCTTTTGCAGCTTGGCAATCTGCTTTTCCAGCGTGTTGATCTGCTTATTGACCGCTGCCAAATTCGACTTAGCGGCAGTCTGATTGCTGCGAGCGGTGTTGTACGCCTTCTTAGCGTCCGTATAAGTCCCCTGCAATTTGGAGATCTGGGCGTCCACATTAGAGGTATCAAAGGTAGCCAGTTTGTCGCCCTCTTTGACCTTGTCACCCTTTTGGACAAACACTTCTTTTACAGTTGCCACAGTGCCGACCTTGTATGTACGGCTGGCGCCTGCGGTCACATCGCCGGTAGCGCTGACCGTCTCGTAAATATCGCCGGTAGAGATGGTGTGCAGGGTCACCTGCTCGCCGCCGTTGACCTTGCGCACAATAAAGATACTGGTCACGATAATGGCGATCACCAACACGATGGCGATGGGAACAATAATTCGTTTTTTGCTCTTTTTAACAGTTGCCATAATTTCGCCTCTTCGATTAAAGATTCATACAAAGTGTGTAACGTGTCTATTATATCACAGGCTGTATAATTGTCAATAACAATTTGTAAAGTTCATAGCCTATTCACATTTGCCGGCAGCCAATGCGCGGGCTCCAATGTCTTTTCTGTAATGCACACCGTCAAAGTGCACTTCCCGTGCAGCGGCATAGGCGGTATCCAGCGCCGCCTGCAAATTGTCACCCAAGGCGGTAATGCCCAGCACGCGCCCGCCGGCAGTCACCAGCTTGCCTTCCTTTTGCGCTGTACCGGCGTGGTACACGGTAACTCCCGCTCGCTGCCCATCGGTCAGACCGGTGATCTCCAGCCCCTTGGGGTAAGACTTGGGATAACCGCCGCTGGCCAAAATTACACAGGCGCAGGCTTTATCACTCCACCGAATGTCCAGCTGCGCCAGCGTACCGGTGTTAATGGCGTCAAAAATATCCATAATATCCGTTTCCAGCCGTGGCAGCACCACCTGGGTCTCCGGATCGCCGAAACGGCAGTTGTATTCAATCACCTTGGGGCCCTTGGGGGTAAGCATCAAACCAAAGTAGAGGCAGCCTTGGAAGGTGCGCCCCTCGGCGTTCATAGCCGCAATAGTGGGAAGGAAAATGGTGTCCATACATTGCTGTGCCACCGCTTCCGTATAGTACGGATTGGGCGACACGGTGCCCATACCGCCGGTATTCAGCCCCTTGTCGCCGTCCAGTGCTCGCTTGTGATCCATGGAGGACACCATGGGGCGCACGCACTTGCCGTCGGTAAAGGCCAGCACAGACACTTCCGGTCCGTTAAGGAACTCCTCCACCACAATATGATTGCCGGAGGCACCGAATACCTTGTCCTCCATAATTTCCTTAACACCGGCCACCGCTTCTTCCAAAGTTTCCGGAATCAGCACGCCCTTGCCCAAAGCCAGACCGTCTGCCTTAATGACAGTGGGGAATTCGTTTTTCTCCGTAATGTATTCAATGGCCGCCCGAGGATCGTCAAATACCCGATACTCGGCGGTGGGAATGTGGTACTTTTGCATCAGATCCTTGGAGAATACCTTGGAGCCTTCAATGATAGCCGCGTTGGCTCGGGGGCCAAAAGTGGCAAAGCCCGCCGCGTTTAGGGCATCTACCATACCGGCCACCAGCGGATCGTCTGGGGCCACGACCACCAGGTCTGCCTTAATCTCCTTTGCCAGCGCCACGGCGCCGTCTATATCCATCGCCGCCACATTGTGGCACACTGCATCATAGGCAATGCCCCCATTGCCCGGGCAGCAATGCACGCTGTCCACTCTGGGTGACTCTTTGATCTTGCGCACCAATGCGTGCTCGCGGCCACCGCCGCCTACCACCAAAACCGTCATATTCTTTGACCTCCAAAAAAGACTTTTAGGAGAACTGCCGTTTTGCCGCCAATTCTCCTGTATTTTCTGTATTTTATTTGTTTTTATTGATAATCCGACTCTCTGCCTTACCGCTCTCCAAATCAATAAATCGGGTAAAGAGGGAAACTTTGTTGTCCTCGTTCAGGCTGTCCCAAATCATTTGAGTAAAGCTGTCCAGGTCGCCGTCCATCTCCACCGGCACCGGCTCGCCCTCAAAGGACGGGATCGGATCGCCGTCGCCCTTATAGGTGTGGATCAAATGACCCAGACCGGGCACCGCTGCATACTCAAAGAAGAAACGCAGGCAGGAGTCACCCCGACCCATATTGGACTTTAAAATGGACAGGTTGTAGTCGCCGTTTGGCTTGACAACGCCGCTGATTCTGGGGGTGTAGTTGGGCGCGTCCGGCTCAAACTCCCGGGTAAGCAGCGCGTGGCGATAGCACTTGCCCTTTGCCATAAAGTCATAGATGGTATCCGTCTGGTCACCGTTGGTGACAATGGTCTTGCCGTCCAAGCACAGCACCGGGTTGTAAATGATCAAAGACGGATCCTCCATCTTGCTCTCATCAAAAGCCTTGGTGCGAATGCCGCCACGGTCGTTCTCCTCAAACACACGGTTGCGGGAATTGACGCTGCGCCCCATAATAAAATAGGCGATCATTGCCGTTTTCCCGTCCTTGCTGCGACCCAACACGATCCCGCGGCCGGGATAGCTGTTGCCGGACAGCAGAATTGAAAGCTGTTGTATCTCCATAATAATCACCATAGCCTTTCAGGCTACATACCGTTCATTAAAAATCATTAACACCTTGCTGTAGCCTGACAAGGTGTTCATGGTGATTACAGCCATCTCAAAATTATGCCAAAGGCAAATTTCGAGGGCAATATAATCTGTATAGTGTGATTTTTCACACTATACCTCAATCTAAAATACGGGTCTTGTTGCCCGTAATCTGAATTTTATCTTGGCAAAAGAGTGCCACCGCCTGAGGCAGCAGCTGCCATTCGCACTGCTCCATCACCCGCCGCTGCAAAATCTCCGGGGTGTCCCCCTCCAGCACCGGCACCGCCTTTTGGGCGATGATGGGACCGGCGTCGCAGTCGGCAGTCACAAAGTGCACCGTAGCGCCGGTCAGCTTAACTCCGCTTTGCAGCACCGACTCATGCACATGGAGCCCATAATAGCCCTTGCCGCAAAAAGATGGAATCAACGCCGGGTGAATGTTCATCATTTTGCCGGGGAAAGCGTCTACCACCTGTTCATCGAGAATGGTCAGGAACCCGGCATACACCACCAGATCCGCCTGCTCCGCCAGCAGCAGATCCCGCATGGCAGCAGAATAAGCATGTACATCCGGGTACGCCTTGCGCTCCAGAACCTTACCGGGAATACCGTGAGCCGCAGCTCGCTCCAGCGCGTACACGCCGGGCTTGGAAGCGATCACGCAAGTAATTTGCCCACCGGGGATCTCTCCCCTGTCCTGGGCGTCCAGCAAAGCCTGCAAATTGGTGCCCCCACCGGAAACTAACACCACAATGCGCTTCATACCAGCTCCACGCCTTTCTCGCCGGACTTGATCTGGCCAATGATTGCAGCCTGCTCCCCTGCCTGTTGCAGGATCCGCACGGCCTCGTCCGCCTTCGTGGCGTCTACGGCAATCACCAAACCGGTGCCCATATTGAAGGTATTATACATATCCCGCTCCGGAATGTTGCCCTCCTTGGCAATCAGGTCAAAAATGGGCTTCTTAAAGCACTTATCTTTCTCAATCACAGCGGTGAAACCATCTTGCAGCATACGGGGCACATTCTCATAGAAGCCGCCGCCGGTAATGTGGCTGATGGCGTGCACCCGCACGCTGTCCATCAGTGCCAGCAGGGGCTTTACATAAATGCGGGTGGGCGTCAGCAACTCTTCGCCCAGGCTCTTGCCCAGCTCCGGTACCTGCACATGCAGCCGCTGGGAAGAAATGTTAAACACCTTGCGCACCAAAGAGAAGCCATTAGAATGTACGCCGGAGGAGGCCACGCCGATAAGCGCGTCTCCGGCTTGCAGCTCCTCACCGCTGACCAACTTGCTCTTTTCGCCAACGCCAACAGAGAACCCGGCCAGGTCATACTCGTCCTCCGGATAAAAGCCGGGCATCTCCGCAGTCTCGCCGCCAACCAGAGCGCAGCCGGCCTGCACACAGCCCTCAGCCACACCGGCCACGATCTGCTCAATCTTCTCCGGGAAGTTTTTGCCGCAGGCAATATAATCCAGGAAGAACAGAGGCTTGGCACCGGAGCAAGCCACATCGTTGACGCACATAGCCACACAGTCGATGCCTACGGTATCGTGCTTATCCATTAAAAAGGCGATCTTCAGCTTGGTGCCTACACCGTCTGTACCGCTGACCAGCACCGGCTCTTTATAGTCGTTCACCGGCAGTTGAAACATACCGCCAAAGCCGCCGATCCCACCAAGCACGCCGGGCACAGTGGTGCGCTTTACATGGGCCTTGATCCGCTCCACTGACTCATAACCGGCGGTCACATCTACACCGGCTGCCGCATAGCTTGCACTAAAACTCTTTTCCATACTCAGATCTCCTCCAGTTTCTTTTGCAGGTCTGTATCTTTTTGGCGCACGGCAGCGGCCATATCCGCCCGCATTTGCACCAGTTTGTCCATTAAGTCGTCATTGCCCACAGCCAAAATTTCCGCTGCCAGCAGCGCTGCGTTCTTAGCCGCATTGACCCCAACGGTAGCCACCGGAATACCCGGGGGCATCATCACCGTAGCCAGCATGGCGTCCATACCGTCCAGCACCTTGGCACTGCATGGGATGCCGATCACCGGCAGCGTAGTGGAAGCGGCCAACACGCCGCCCAGGTGCGCCGCCATACCGGCGGCCGCCAGAATCACACCAAAACCGTTCTCTCGGGCGCTCTCTGCAAAGGCCATGGCCTCCTTGGGGGTACGGTGGGCGCTCATTACATGCACCTCTGTCTCAATGCTCAGTTCCCGCAGCTGCTTAATGGCCGGTGCCACCACCGGCAAATCGCTGTCCGAGCCCATAATGACTGCAACTTTTTTCATAAAACTGTCCTCCGTTTGCGGTGGCGCACCGGGCGCGACACCGGGTATGGCAAGTATTTTTTCGTTTATATTACGGCTATTATACGCTATATGCGGTGCTTTTTCAATAGAAAAATACAAAAACCAACCCGTGATTCCACAGGTTGGTTTTCTCTGTTAATCGTAAATGCTTTCGTCCAGCTTGCCGGCACCGATAAAACCGGCAGCGCCGTCCATATCCGCAGCGGTAATTCGCCCGTCTCCGTTAAAATCCAACAACCGCTCATACGCGCCATCGCCCCGGTCAATGTCGGCTGCGTACTGCTGTAAAGTCACCAGATCCCGGGCGTTCACATACCCATCGCCGGTCAAATCATAGGCCATCACCGGCACATCGCCCAAGTCTACGCTCTGTGTAGTGACCGTTACCTGCACCTGGCGGCATAAGTAAAAATCCGCCCCCACGGTCAAGGTATAAGTACCCGGCGCCACGGCAATGGAAAATGTGCCATTTTCATCGGTTTGCACGCTCTCATCGCCCAACTCTATCGTCGTGCCCACCAACAGATAATTGTGGGGGTGACTGCCGTCCGGGCTCTCCATTGCCACCGCACACCCGGTAACCGTGTAGCTAAGCGCCGGTTGATAATTCGCATCATAGCTGCTGCCGCAGCGCCGGCAGGTGTAGCGGGTGTAGCCCTCCTCCGTTGTCGTCGGCGGGATTACAACGGCGGTATAATCGTGCCCCAACGCCGGGGTACTGACGGTATCGGACAAATGCGCTCTGCACCGGGTGCAATAATCATAAGTATAACCCGGCAAGGTGCATGTTGGCTCAACTCGGTGCGTGGCAGGCGCCGTATGCCCCAGCTTGGCAATCGGGGTGGCATAGCTGTCACCGCAAGTGCAGGTGTAAAGGATTTGGCCGTCTGCCACGCAAGTGGGTTCTGTGCGTTGGGCGGTGTACACATGGGTGTGTACATGCACCGGCACAGCAGCCGTTTGGTCCCCCCAGGTCAGAGTGGCGGTGTATGTACCCTCTGTCCAGTGATGGGCGACCTGATCGTCCGTCAAAGAAAAGACATGGCCGTTATAGTTTTCCTCTGTCAGCGGCAGGGTCACCCGGTCGCCGGTATCATAAGTGATGGTAATTTGCAACCGATCGGTAAAGGCGTTCAGGTCAAAGTAAGCATAGGTCTGCCCATCGCTGTCCGTGCGCGCCGTGCTATCCACACCGGTGACCAGCACCTGATCTGCCGGGAATGCGGCAGAAAAACCGGTCACTTTACCCGGATACAAATACGCCGTGTATGCCCCCAGGCTGTGGTTATTGGTCACTTGAAAATAATAGGTCTCCCCTGCCTGTAAAGTACAGGTGAGATCAAAATTCAGATCATAAAGGGAACGGTCGTCGCTGCCTTGCCCCAGGTCCGCCTTGCTGCCGTCGCACAGGCGCACCACCGTGTCCACACTGCCCATGGAGTAAAAATGGTAGGTACCGGTAGCGACGGGGGTATAGCGATACCAATCTGTACCGCTGTAGGATTGAAATGTGTTGCCAAAGGTGGCGCCTTGGGTCAGCTCCAGCGACGGATCGAAGGTAATCTGTGCCGCTGCGTCCGCATAATACTGGGCAGTGGTGCCGGTCAGCCCCCGCAGGGTAAAGGCAGGCATGGGGCGGCCGTCCTCGTCCTGGTACCCAACCGCGTACTGACCAAAGCCGGTGCCCACCGGGAACTGCGCAGCGGTCAGCGCCTTGCAGTCAATAAAGGCACAGGCGCCCAGCTGCAAACTGCCGGCCATATTGTCAAACTGAATATCCGTCAGCCCGGAGCAAGCGGCAAAGGCATAGCTGCCAATGCCCGTGACCCCGGCAGGAATTCGTATCGACTGCAAGGCTGCGACATGGAAAAAGGTGTTACTGCCAATGGTTCTCAAGCTCTCCGGCAACTGCACATCCGTAACAGCCGTCAACTGGCGAAGCAGATTGTCTCCCAGCCCGGTAATGCCCTCCTCCACTTGTACCGTGCGGATTTGGCTGCGGTGGGCGGCAAATGGCGGCAGACTCTCCGGGGTGTAATCCGGCGTAGCACCGGTGCCGGTAAGGGTCAAGGTGCCGGTACTCTCCTCAAACACATAATCCACCTGACTATCACCTAAAGTCCCCTGCTCCTCGGCAAAGGCAAAAAAAGATGGCATCCCAACAAACACAGTTGCCAGCAGGAAACAAAAGATCACACTGTACTTTTTCATCAGGATACCACCTCACATATTCTGTTGTCATTATACCATAAGCCTGCCGCCGGTGCAACCGTCAGTCCGCCAGCACCTTACGCAGCAGCTTGCGCACCTTTTGCAACCGGGTACGCACCGCAGAGCCGGAAATACCCAGTGCCAGACCGATCTCTTTACTGCCGTAGCCCTGGCGCCGCATAGCGAGCAAAATCTGATCCTCTCGCCCCAGCATACCCAGCACCTGCGCCCACTCTACCATGGTGATGGGATTCTCCCGATCCGGCAGGTCAAAGTCCTCCGGTATTGCCACGCACACCGCCCGTGCAGCAATGGCCCGGTAGTGGTCGGCGCACACGCTGCGGGCAATGGACAGCAGCAGGCTTTTGTCCGACTTGGGGAAAGCAGCCGCCCCCAGCAGCCACTGCCAATACTGCATAAAGGTCTGCTGGGTCAGCTCCTCGGCCAAATCAGCAGGCACACGACCGCGAATCCAACGCAGCACCGCAGCATAAGATCCAGCATAAACAGCATTAAAGTGCTCATACTTTGTACTTTTTTCGGAATGCTTCATACGCTTCTTCGTCCATGACCATATTGCCTACTATGCTGTTGGCCTGCACCGTGCCCAGCAGCGGCTTGGGACATACGGCAACCGCACCTACGATAAACAACAGGTGCTTATCCGTGATCATCTCCGGGGTCACATCCGGCGCAAAAAACAGGCTGCTGCCCACCACGATCACCGCGCCGTCCTCCAACCGGGACAGCAAATCCGCACCTGCCCGCAGCTCTGCGGAGAACTGGTGCAAATGGTCCAGATCCCGATCCAATTCTCGGAACATACCGTTCAGGTTCTCAATCACCAGGCCGGTGCCCTGCTCTGCAACGCCTATACCGCTCAGAAAGACCCGGGCGTGCTTTTCCCCGGCAGCCCGTCGAAAGATGGTCATACCGTTACAAAGGCAAATGGCGCCCTCCGGCAGCGTAGACCCCAGCACATTCAACCCGTTATACTGGGCCACTTTGTCCATAGGCGCAAACACCTCCTGCGCAATGGCCCCCTTGGTTATATCCGCATAGGCCTCTGCGAATGCCGGTGAAGGATTCTCCGGCAGCAAGATGGTGCTTACCGCTTGAATAGAGCTGATCTTGCGCAGCGCCTGGGGCGTATAGTTGCGCAGATCTAATACGGACACGGCCTCAATTTTCTTTTTACCGAACATCGTACATTTCCTTTCTGCTGGTCAAAGCGTTCCCCATTGTGTGTACACTCTATAAGACGGCTGCCGGGGGCAAAGTGTCTGCACACTTTGGTCATTTTTATAATAAACGCCACGATCATGAAAAAAGGCGTATGTACCGGAGTACATACGCCTATAACCGTCATAATGACCTGCGCTTATACAAGCTCAATGATGCACATCTCAGCTGCGTCGCCGCGACGGGGGCCAGTCTTTACAATGCGGGTGTAACCGCCGTTTCTGTCCTCGTACTTGGGAGCGATCTCATCAAACAACTTCTTTACAACATCTTCCTTGGTAACATAGGAAAGCACCTGTCTTTTGGAAGCCAAAGTGTTCTTCTTGCCGAGAGTGATCATCTTCTCAGCCATAGCGCGAACCTCTTTCGCTCTGGTAACGGTAGTTTCAATCTTGCCGTTTTCTAAAAGAAAAGTAACCATACCTCTGAGCATTGCTTTTCTGTGGTCAGTAGGTCTGCCCAATTTTCTGGAACCTGGCATTGAAATTCCCTCCTTTAATCCTCATCGTGACTCAGGCTGAAGCCCAGGGATTGCAGCTTGGCAACCACCTCGTCCAGGGACTTGCGACCCAGGTTTCTAACCTTCATCATATCTTCTTCGGATTTGCTGATCAAATCCTCTACTGTGTTAATGCCTGCTCGCTTGAGACAGTTGAAAGAGCGCACGGACAGATCCAGTTCCTCAATGGTCATCTCCAGAACCTTCTCCTTGCCGTCGTCATCCTTCTCCACCATAATATCCTGGTTGCCGATCTCCTCAGAGAGATCCACAAACAGCATCAGGTGGTCGTTGAGAATCTTAGCAGCCAAAGAAGCGGCCTCGTCAGCCGGAATGGTGCCGTCCGTCTCAACATCAAGAATCAGTTTATCAAGGTCTGTCTGCTGACCTACACGGGTGTTCTCTACGGTGTAATTCACCTTGAGCACCGGGGTGTAGATAGAGTCGATTGCAATGGTGCCGATGGGCAAATCCATCAGCTGCTTGTTGCGGTCACAAGGCACATAGCCGCGGCCACTGTCTGCCGTCAGCTCCATAGATACGCTGGCGCCGGCGTCCAGATAAGCAATGTGCAGCTCGGGATTCAGGATCTCTACATCTGCGTCATGAATAATATCGCCCGCAGTGATCTCGCCTTCTCCGCTGGCCTCAATGTGCAGCATCTTCGGCTGCTCATCGTGAATCTTCAGGATAACGTTCTTGAGATTCAAAACGATCTCCGTCACATCTTCCTTTACATGCGGAATGGTAGAAAACTCGTGCAGCACACCATCAATCTTCACGGAAGTGATGGCATAGCCGGGCAGAGAGGAGAGCAGCACTCTCCGCATACCGTTGCCCAGAGTTGCGCCGAAACCTCTTTCCAGAGGTTCCACCACAAACTTACCTACGCTTCTGCTTCCCTGAGTAGATAAATCTACAATCTCGATTTTCGGCTTATCAATTTCAATCATTTAAAAGCCTCCTATTTTGATTTTAACAGCTAAATAACAGAATGATCAACTATTATCTAGAATAGAACTCAACGATCAAGTGCTCTTCAACAGGATAATCAATGTCTTCACGGGTGGGCAGAGCCACAACCTTAGCGGTCAGCTTCTCTGCATCAACCTCCAGCCACTTGGGAGCGTTGCCATAAACGCCCTCTTCCTTCACGAGCTTAAATCTGCCGTTCTCCTTGCTCTTATCCACCACAGCGATCACATCGCCGGCCTTCACAAGGTAGGAGGGAATGTTGACCTTTTTGCCGTTCACGGTGAAGTGACCGTGAGAAACAGCCTGGCGAGCCTCACGACGGGTCTTGCAAAAACCGGTGCGGAAAGCCACATTGTCCAAACGGGTCTCTACCATGGTCAGCAGCACAGCACCGGTCTGGCCGGGAGCCTTAGCTGCCTTCTCATAGTAAGAATGGAACTGCTTCTCCAGAATGCCGTAAATGAACTTCACTTTCTGCTTTTCCTGCAGCTGCATAGCATACTCGCTCTTCTTGCGGCGATTCTTGGTATAAGAATTTCTGAATGTATCCTTATTTGTATAGCCCATAACAGCCGGAGAAATGCCGAGTGCTTTGCAGCGCTTTGCGATGGGCTCTGAATTCTTTGCCATATCTTCTACACCTCCGTTAGATTATACACGACGTCTCTTAGGCGGACGGCAGCCGTTGTGCGGAATGGGGGTAACATCCTTAATCAGGGTTACATCCAGACCGGCAGTCTGAAGTGCGCGGATGGCAGCTTCACGGCCGGAGCCGGGGCCTTTAACGAAAACTTCCACCGTCTTCATACCATGCTCCATAGCAGCCTTAGCAGCAACCTCGGCAGCAGTCTGTGCAGCAAAGGGAGTAGACTTCTTGGAACCACGGAAACCCATTTCGCCGGCAGACGCCCAAGAAACGGCATTGCCCTGCGTGTCCGTAATGGTTACGATGGTGTTGTTGAAGGTTGACTGAATATGGGCAGCACCACGTTCAATATTCTTCTTCTCGCGGCGTTTGCGAGAGCCAGTGGTCTTTTTTGTAGCCATACTACGAATATCCTCCTACGCTTATTTCTTCTTGTTTGCTATGGTCTTCTTGGGACCTTTGCGGGTGCGGGCGTTGTTCTTGGAGGTCTGTCCTCTTACAGGCAGGCCCTGACGATGGCGCATACCGCGATAGCAGTTAATTTCAATGAGTCTCTTAATGTCAAATGCTCTGTCTCTGCGCAGATCACCTTCAACATTCAGGTTCTTCTCAATGTAATCACGAATTTTGGAAACCTGATCCTCGGTAAGATCTCTGCAACGAGTATCGGGATCAATTCCGGTTGCCTCTACGATCTGAGTAGCAGTGGTACGGCCGATACCATAGATGTAAGTAAGGCCGATCTCAACTCTCTTGTCGTTGGGCAAGTCAACACCAGAAATACGTGCCATATTGTTTTACCTCCGAATTATTGCTCAGGATTAGCCCTGACGCTGTTTGTGCTTTGGATTTTCACAGATAACCATGACTTTACCATTGCGCTTAATCACTTTGCATTTGTCGCAAATTTTCTTTACAGAAGGTCTGACTTTCATTTGAATATCCTCCTTTATTTACTTTGAGCGCCAAATAATACGACCCTTGTTCAGGTCATAGGGTGACATCTCAATCGTTACCTTATCACCGGGAAGAATACGAATGTTGTTCATCCGCAGCTTACCGCTGATATGGGCTAAAATGATGTGGTCATTTTGGAGTGCTACCTTAAAGGTCGTGTTGGGCAGCGCCTCAACCACAGTACCTTCCACTTCAATCATATCTGACTTTGACATCGTTTACCTCTCTTATGGATAGGATCTTGAATTGATGTTCGCTCTTATCTGGAATCACATTACGGCGTAATCGCCTGCAATTGATTAACGCCTCAGACTTTGGTCAAAATGACCGGACCGTTAGAGGTAATGGCAATGGTGTGCTCAAAGTGCGCAGCCAGCTTGCCGTCTGCCGTCTTGACCGTCCAACCGTCTGAAAGCTGTTTTACCTTATAGGTCCCCAGATTTATCATTGGTTCAATTGCCAATGTCATTCCGGGTAATAGTCTGATACCGCGTCCTGCGTGACCGAAGTTTGGTACGCTGGGGTCTTCATGAAGTTTGGTGCCCACGCCGTGACCCACAAAGTCACGAACAACACCGTATCCGCGTTCCTCGCAATATTCTTGTACTGCGTGACCGATATCGCCGATCCTGTTGCCGGGTATCGCCTGCTCAATGCCTTTATACAGGCTCTCGCGGGTGGTATCCATCAGCCGCTTTGCCTCGGGCGAGCAAGACCCGACTGCAAATGTGGCAGCATTATCGCCGTTATAACCGTTTTTGGCCGCACCCAGGTCGATGCTGACAATGTCACCCTCTTGGAGGATGCGGTCCTTTTTCGGTATACCGTGGATCACTTCATCATTTATGGATATACATGCAGTAGCGGGATAGCCCCCATAGTGCAGGAAATTGGGCTTAGCACCCCGTTTGATGATCAGATCGTAAGCGATCTTATCGATTTCCTTTGTAGAGATGCCCGGCTTAACAGCCTCACCTGCTACCATCAATGCTTCAGCGGAGATCTGACAAGCCTCTTTCATCAGCTCCAGTTCTCTGCTGCTTTTCAGCACGACCATGTTAATCCTCCAGTGCTGCAAAAACGAGTGCCGTGGTGTCTGCCACCTCTTCCTGACCCTCTACGACTGCCAGCTTACCCAGCTTGTCATAAAAGTCCTTCAGCGGCTCGGTCATCTTGTGGTATTCCACAAGGCGAGCCTGCACCGTCTCCGGCGCGTCGTCCTTGCGTTGAATCAGTGCACCGCCGCAAGCGTCACAAACACCGTCCACCTTGGGCTTTTTATAAAGCATGTGGTAGGAATTTGCACACTTTGAACATACACGGCGGCCGGACATTCTGGCGGTAATTTTCTCGTCAGGGACTTCTATATCAATGACCTTATCAATAGCCACGCCCATATCCTCAAGCGCCTGGGCTTGAGGAATGGTACGAGGAAATCCGTCCAGAATAAATCCGTTTTCGCAATCTTTTTGTTCCAGTCTGTCCTTGATGATCCCGATAACCACATCGTCCGGAACCAACTGGCCTGCGTCCATATAGGACTTGGCCTTCAGGCCCATCTCGGTGCCCTCTTTCAGAGCGGCACGGATGATGTTACCGGTGGAGATGGCAGGAATACCATACTTTTCAACAATCTTTTCCGCCTGGGTGCCTTTGCCGGCACCGGGCGCGCCAAGAAGGATCAAATTCATCTTGCGTTCTCCTTATAATCAGTCAAGGAAGCCTTTATAGTGGCGCATCATCAACTGGCTTTCCAGCTGACGCACCGTCTCCAGAGCTACACCGCACATAATGATGATGGATGTACCGCCCAGGGTGATGCTCATGCCGCCGTCGTCACCGCCGGTCTCCAGGGGCGGAATCGCCGCCTTACAAATCAAGGAGTACACGATGGGGAACAAGGCAACTATGCAAAGCATCAAGGAACCGATCAAGGTCAGACGGGACAGAACCCGCATGATGTAATCGGAAGTGGGCTTGCCGGGACGAATGCCGGGGATTGCGCCGTTGTTCTTACGAAGATTATTTGCCATTTCAATCGGGTTGTACTGAATGGTGCTGTAGAAATAGGCAAAGAAGATGATCAGCAGGAAGTACATACCCGCATACCACCAAGAGTCACTCTGGAAGGCGTTAAAGAACTTCTCCCAGCCGGTGCCCTGGTACTTGTCGGCAGAAATGAACATCTGCACCGTACCGGGCAGGGACAAAATAGAAGATGCAAAGATGATGGGCAGCACGCCGCTCATATTGATCTTAATGGGCATGTGGGTGGACTGACCGCCGTACATTTTGCGGCCCACAACGCGCTTTGCGTACTGAATGGGCAGGCGACGCTCTGAGTTATCCATAAATACGATGTAAGCGATCATCAGAAGGAAGATCACGCACACCACGGGAACCAGAACTTTGTACACGGTACGGCCGGTGTCCAGGTACTGGAACAGCTGCTTGATCAGGGTGGGGAAACGAGACACGATGCCGGCAAAAAGGATAATGGAAATACCGTTACCGATACCGGAAATGGTGATCTGCTCGCCCAGCCACATAATCACGGCTGTGCCGGCGGTGAGCACTGCAATAATGACCACTGCCTGGAACACGGCGTCAAAGCCGGTGAATGCTGCGCCGCTGGCATCCTTCATCAGATAGCCGTTGGCACGCAGGAAGAAGAAGTATGCCAGGGACTGCAACAGACCCAGACCAACCGTAACGAAACGGGTGATCGTGGCGATCCTCTTTCTGCCTTCTTCGCCCTCCTTCTGCAACCGCTCCAGTGCAGGAATGGCCACAGCAAGAAGCTGCATAATAATGGAGGCATTGATGTACGGTGTGATGGACATAGCGAAAATTGTTCCGTATGTGAATGCACTACCGGTCATCAAGCTCAGGTAGGTTAAAATGGTGTTGCCCTTACCTACATTGATCTCATCTACAATGTTCAGGAAAGGAACAGGAATGACAGAGCCAATTCGGAAAACAAGGATAACAAATGCTGTAAACAAAAGCTTTTTGCGGATGTCCGCAACTTTCCAAGCGTTTACGAAGGTCTTGATCATTTACAGCACCTCCACCTTGCCACCTGCTGCCTCAATCTTAGATTTGGCGCTCTCACTGATGGCGGTGACCTGAACGGTCAGAGCCTTAGTAATCTCGCCCTTGCCCAGAACCTTTACACCGTCCAGGGTCTTCTTCAAAAGACCGGAGGCCACCAGGCTCTCAGCGTTCACGGTTGCGCCGTCCTCAAATCTGTCGTTCAGATCAGACACATTGACAATGGCGTACTCCGTTGCAAAAATGTTGTTGAAACCTCTTTTGGGCACACGACGCTGAAGGGGCATCTGACCACCTTCAAAGCCGGGCCGTCTGCTGTAACCGGAACGGGCCTTCTGACCCTTCTGGCCTTTACCGGCGGTTTTACCCTGGCCGGAAGCAGTACCGCGACCGATACGCTTAACACTCTTTTTGGAGCCTTCAGCAGGAGAAAGTTCATGTAATTTCATCTTGCTACCTCCCCTTATTCTTCAACAACGGTGATCAGGTGTGCGATCTTCTTGATCTTGCCCTGAGTTGCGTCGTTGTTCGGCTGAACGGTTTCGTTGCCGATCTTCCGCAGGCCAAGAGAGTGGGCGGTGGCGATCTGGTCCTGCTTACTGCCGATCAGGCTTTTTGTAAGTTTGATTCTAATATCTGCCATAATGCGCCCCTCCTTATCCTACGATTTCTTTCACTGACTTACCGCGAACAGCAGCAACTTCCTCTGCTGTGCGCAGTCTGCTCAAGCCGTCAATGGTGGCGCGAACCACATTGTACGGGTTGTTTGAGCGAACGGCCTTGGTACGAATATCGCCGATACCAACGGTCTCAACAACCGCACGAACCGGGCCGCCGGCGATCACGCCGGTACCTTTGGGAGCGGGCATAAGCAGCACTTCGCCAGCACCGAACTTACCGGTGATCTCATGGGGAATGGTGGTACCCCGCAGAGATACTTTGATCAGATTCTTCTTTGCGTCCTCGATCCCCTTACGGATAGCGTCCGGAACCTCGCCGGACTTACCGATACCGAAACCGACCAGACCATTCTTATCACCAACAACCACCAGTGCGGAGAACTTAAAAATTCGACCGCCCTTTACGGTTTTAGAAACACGGTTGATGGTAACCACTCTTTCTTCAAGTTCCATTGAAGATGCGTCAATCTTTGTAGCCAAAAGTATTTACCTCCTTCGTTAGAACTTCAGTCCGCCCTCACGAGCGCCGTCTGCAACTGCAGCCACACGACCGTGATACACGTAACCGCCACGGTCAAATACGCACTCGGTGATGCCCTTTGCGGTGGCTCTTTCTGCTAATGTCTTACCAACAGCCTTAGCTGCTTCTACATTTCCGCCGTACTGTGCAAAGTCCTTCTCAGTGGTGGATGCACTTGCCAGCGTTACACCGGCAACATCATCAATGAGCTGAACGTAAATATTGCTGAGGGAGCGATATACGTTGAGTCTGGGACGAGCAGCAGTGCCGCTGATTTTGCCACGAACACGAATGTGGCGCTTTTGTCTTGCCTTATTGGCGTCTTGTCTTGAAACCATTGTAATTCACTCCTTCCCTTATTTCTTACCTGCTTTGCCTTCCTTGCGGCGAATATGCTCAAAGTCATACTTGATACCCTTGCCCTTGTAGGGTTCCGGGGGTCTCTTCTCGCGGACCTGCGCGGCAAACTGGCCTACGGCCTGCTTGTCTGCGCCGCTGATGACAATGGCGTTGGCACTGGGGCACTCAATGGTAATGCCTTCCGGTGCGTCCATGATCACCTGGTGAGAAAAGCCAAGGTTCATTGTGAGCTTGTTGTTCTGTACCTGTACTCTGTAACCAACACCGTTGACTTCCAGATTCTTCTTGAAGCCCTCGGTCACGCCCAGAACCATGTTGTGAATGAGGGTGCGGGTCAAGCCGTGAAGAGACTTGTTCTCCTTCTCATCGTTGGGTCTTTTTACAATAACTTCGTTGCCTTCTACTGCGACTGCCATGTTCGGATGAACATTCCGGGTAAGTTCCCCTTTGGGGCCCTTTACGGTAACAGTCGTTCCGTCAACCTTTACGTCAACGCCGGCAGGAATTTCAATAGGCTTTAAGCCAATTCGTGACATACGACTGCACCTCCTTACCAAATAAATGCCAGAACTTCGCCGCCCACATTCTCTTTGCGAGCTTCTTTGTCTGTCATTACGCCTTTAGATGTAGAAACGATGGCTACGCCCAGGCCCTTCATAACCTTGGGCATATCCTCAACGCTTGAATACTTACGAAGACCGGGCTTAGACACGCGGCGCAGACCGGTGATGACGCGGCTCTTGCCCTCGCCATACTTCAGGGTCACGCGGATAACGCCCTGCTTGCCGTCTTCAATTACTTTGTAGCCTTTGATATAACCTTCATCTACCAGAATCTGAGCAATTGACTTCTTCATGTTAGATGCGGGAATATCTACAGTATCGTGCTTTGCGGAATTCGCATTGCGAATTCTGGTCAGCATATCAGCGATAGGGTCTGTAATATGCATTGATATTTCCTCCTTATTCGATCTTCAATTCTCAGATTACCAAGATGCCTTGCGCACACCGGGGATCTCGCCCTTGTGAGCCAGCTCTCTGAAGCAGATACGGCACACGCCATACTTACGCAGGTATGCGTGGGGTCTACCGCAGATCTTACATCTGTTGTGCTGTCTGGTGGAATACTTGGCAGGACGAACTGCCTTGACTTTCATAGATGTTTTTGCCACGATAATCCCTCCTTACTCTGCAAACGGTGCGCCCATCAGCTTGAGCAGCTCCCGTGCTTCTTCGTCTGTGTTTGCGGTGGTTACCATAATGATATCCATACCGCGCACCTTGTCGATCTTGTCATATTCGATCTCGGGGAAAATCAACTGCTCTTTGATACCCATGGCGTAGTTACCACGGCCGTCAAAGGAGTTTGCATTGATCCCTCTGAAGTCACGCACTCTGGGGAGAGCCAGATTAAAGAATCTGTCCAGGAATTCATACATTCTCTCGCCACGCAGAGTGACCTTTACGCCGATGGGCATGCCCTCACGCAGCTTGAAGTTTGCAACAGACTTCTTTGCGCGGCACACCACGGGGCGCTGACCGGTGATCTGGGACAGGTCGGAGATGATTGCATCTACAACCTTAGAGTTTTCGCGGGCTTCGCCGCAACCAACATTGATAACAATCTTGTCAAGCTTCGGGATTTGCATAACAGATTTGTAGCCGAATTTCTTCATCAATGCCGGAGCAACTTCGCTCTTATAGGTTTCTTTTAACCTTGCAGCCATTGTTATGTTCCTCCCTTACTTAAAATTCGTTGCCGCATTTTTTGCAAATGCGTGCGCCGCCCTTTTTGTGGCCGACGCGGGTCGCCTCGTTACATTTGGGGCACACCAGCTGTACCTTGGAAGCGTACAGCGCGGACTCAACATCAATCAGGCCGCCGGCCTCGCCCATCTTGCGGGGCTTTACGTGCTTGGTAACCACATTGACCTTCTTGACAATGACTTTACCCTCGGCAGGGCTAACGGCAACAACTTCGCCGCGCACGCCCTTGGATTTACCGGACAGCACCTGAACGGTATCGCCGGATTTTACAAACATCTTACTCATTCTCTCGCACCTCCATTAAAGCACTTCCGGAGCAAGGGACAAAATCTTCATGTAATCCTTATCACGAAGCTCTCTTGCTACGGGTCCAAAAATACGGGTGCCACGAGGCGTTTTATCCTCTTTGATAATTACGGCAGCATTTTCATCAAAACGAATGTACTGGCCGTCGTCACGACGTACACCTTTGGTTGTACGAACGATGACTGCTTTAACAACTTCGCCCTTTTTCACCACGCCGCCGGGTGCTGCTTTCTTGACGGAAGCAACGATCACGTCGCCGATGTTGGCGTATCTTCTGCCGGAGCCGCCCAGCACGCGAATGCAAAGGATCTCTTTAGCACCGGTGTTGTCTGCGACCTTCAGCCGACTTTCCTGTTGTATCACAGCATTTTCCTCCTTCGTACTGCAAAATAACACTTTGCTCATCTTGCAGTTATTATTTTAGTTCCGACTGCAAAGGCAGTCTGTATGAAAAACCAAGTAATCCGTTTGAATTATTTAGCCTTTTCAATGATCTCAACCACACGCCATCTCTTGTCTTTGCTGTAGGGACGGGTCTCCATAATCATAACCTTGTCGCCTACGCCGCATTCGTTCTTCTCGTCGTGTGCTTTGTACTTCACGGTACGGTTTACGATCTTGCCATACAGCGGGTGAGCCACTCTGTCCTGAATGCTAACCACAACTGTCTTATCCATCTTATCGCTGGAAACAAGACCAACTCTTGTCTTTCTGAGGTTTCTTTCCATGATCAGTTACCTCCTTCTTAAGAGTTAGCGCTTTCGAGTTCGATTGCGCGCTCCACAGTCTTAATGCGTGCAATGTCCTTCTTGACCGCTTTAATTCTCATAGGGTTGTCGAGCTGATTGATGGCCTGCTGGAAATGCAGGTTGAAGAGTTCATCCTTGAGCTCTGCCAACTTCTTTGCGCGCTGATCGGCGCTCAAAGCACGGATTTCTGCTGCTTTCATTCCTGCTCGCCTCCCTCTTTCTTAACGAACTTGCATTTTACGGGGAGCTTGTTGGCAGCAAGACGCATAGCCTCGCGCGCCACAGACTCCTCAACGCCGCCCAGCTCAAACATAACGCGACCGGGCTTTACCACGGCTACCCAGTAATCCACGTTACCTTTACCTTTACCCATTCGGGTATCGGCAGGACGAGCGGTAATGGGCTTGTCGGGGAAAATCTTGATCCATACCTGACCGCCACGCTTGGTGTAACGGGTCATAGCGATACGGGCAGCCTCGATCTGTGCCGCAGTGATCCATGCAGGCTCAGTGGTCATCAGACCGTACTCACCGTAGGTAACTTTATTGCCGCGGGTAGCCACACCGGTCATACGACCTCTGTGCTGCTTGCGGTGCTTAACACGCTTAGGTAACAGCATTATCGATTTCCTCCTTCCCGACGATTTCTTCTCTTATTACGAGACTCGTGAAGAACCTCGCCCTGGTAGATCCAAACCTTTACGCCGATACGGCCGTAAGTGGTCTTAGCCTCAACCAAACCGTAGTCAATGTCTGCACGGATGGTCTGCAGCGGGATCGTACCCTCTTTGTATGTCTCGGTACGCGCGATCTCGGCGCCGCCTACACGGCCGCTGAGCTGGATCTTGATACCACGAGCGCCAAAACGCATGGTGTTGCGGATAGCGCCCTTTACTGCACGGCGGAAAGATACACGCCGCTCCAGCTGACCGGCCACATTCTGAGCAACCAAGGTTGCATTCAGATCGGGCTGCTTGATCTCAACGATGTTGATGTACACTTCGTTCAGTTCTTTGCCCAGCTTCTTGGCACACAGTGCTCTGAGCTTTTCGATCTCAGCGCCCTGCTTGCCGATCACCATACCAGGCTTTGCGCAGTGGATGTTGATGCGCACACGCTTGGCGTCACGCTCGATCTCCACCTTGGGAACACCTGCGCCGGAAAGGGTCTCCAGCAGATACTTACGCAGCTTGTAGTCCTCTACAAGGGTATCGCCGAACTCGCCCTTCTTTGCGTACCAGCGGGAGTCCCAGTTTTTAATGACACCGATTCTGAGACCGGTAGGATTACATTTCTGTCCCATTTAACTCTTCCTCCTCGCTTAGTCTTCCATTTCCTTAACGGTAATGGTGATGTGAGATGTTCTCTTGTTGATTCTGTAAGCTCTGCCCTGGGCTCTGGCCTGAATTCTCTTCAGAGTGGGGCCGGCGCCTACATTGCAGTCGCTCACATACAGACGGGAAACATCCATATTGTTGTTGTTCTCTGCATTTGCCATCGCGGACTTGAGCACCTTCATCACAGGCTCACAAGCGGCTTTGGGGGTGTATTGCAGAATAGCCATGGCCTTGTCGGCAGGCTGCTTTCTGATTAAATCAAGTACGATCTGAACCTTTCTGGGAGAGATACGGACGTACGTTGCTTTTGCTGTAGCTTCCATAATAAATCTCCTTTCCGATTACTTAGATGACTTGGAGCCTGCGTGGCCTCTAAATGTTCTGGTGGGCGCGAACTCACCCAGCTTATGGCCGACCATGTCCTCGGTCACATAGACCGGTACATGCTTTCTTCCGTCGTGAACAGCAAAGGTATGACCTACGAATTCAGGGAAGATTGTGGAACTTCTGGACCAGGTTTTGATAACCTGCTTGTCGCCCTTAGCGTTCAGGGCTTCAACCTTTTTGAACAGGCTTTCTTCAACATAAAAGCCCTTCTTGGCACTTCTACTCATTTAATCTTCTCCTTTCTTCTTATTTACCGTTGCGACGGCGAACGATCATCTTGTCAGACTTTTTCTTCTTGCTGCGGGTCTTATAACCCAGAGCAGGCTTGCCCCAAGGGGTGCAAGGACCGGGACGGCCGATGGGGGACTTACCCTCACCACCACCGTGCGGGTGGTCATTGGGGTTCATTACAGAACCACGAACAGTGGGACGGAAGCCCATATTGCGCTTACGACCGGCCTTACCGATCTTCACATTTGCATGATCGGCATTGCCAACCACGCCAATGGTAGCCATGCAGGTGCAGGGCACATTGCGCAGTTCGCCGGAGGGCAGACGCAGCAGTGCGTACGGGCCTTCCAGAGCCATCAGCTGTGCGCCGTTACCGGCAGAGCGAGCCAGCTGTGCGCCGTTACCGGGATACAGCTCCACATTGTGTACCATGGTACCAACGGGAATGTTCTGCAGCGGCAGAGCGTTACCGGCCACGATGTCTACATCCGTACCGGCTACCACGGTGTCGCCTACCTTCAGGCCTTCGGGAGCGGTGATGTAGCTCTTCACGCCGTCCTCATACTGGATGAGAGCGATGTGTGCGCTTCTGTTGGGATCATACTCAATGGTCTTGACCTCAGCGGGAACATCGAACTTGTTGCGCTTGAAGTCGATCACACGGTATTTTTTTCTGTTACCGCCGCCACGATGACGAACGGTGATTCTGCCGTAGGAGTTGCGGCCGGACTTTTTGTTCAGCGGCTGAAGCAGAGAACGCTCCGGAGCAACCTTGGACAGAGAAGAGTAATCGGTAACCGACATATTCCGTCTGGACGGCGTAGTCGGCTTATAAGTTTTGATTGCCATTCTTATTTCTCCTTTCCGGATAACTTTGCGAAAGGATGGCTCCTTTCATACCTCATCACCCGAAATCATGGTTGTCTTAGTGTTTGTATATATAATGTATAAGAGATTACATCATATCGTTGAAGAACTCAATCTCCTTGGAGTCCTCGGTGAGGGTAACCACAGCCTTCTTCCAAGAGGGGGTGTATCCCACATTGGCGCCCTGGCGGCGCTTCTGACCTCTTACATTCAGGGTGTTTACTTTCTTCACCTTGGTGCCGGGGAACAGTTCCTCAACAGCCTTCTTGATCTCAATCTTGCCGGCATCTTTGGCAACTTTGAAGGTATATTTCTTCATCATGATGCCGGTCATGGACTCTTCCGTAATGATCGGCTTAATGATAATGTCCTGTGCAGCTTTCATTATGCATATACCTCCTCGATCTTCTTGGCGGCGTCCTTCAGAACAACGAAGCTGTCGCAGTTGAGGACGTCATACACGCAAAGGGTGTTGACGGTCACAACCTTAACGCCGGCGATGTTCCGAGCGCTCTTATAAATCTTCTCGTCCTTATCTGCGGTGACGATCAGGGTCTTCTTGGCAGCCTTCAGCTTGGTGAGCATCTCGACCACAGCTTTGGTCTTAATGTCTTCCAGCTCTACCTTGTTAACTACCATCATCTCCTCAGCAGCAACCTTGCTGGACAGCGCGGACTTCATAGCCAGTCTGCGCACCTTCTTGTTGATGCTGATGCCGTATGTTCTGGGCTTCGGGCCGAGAGCAATACCGCCGTGGGTCCACTGCGGGCTTCTGGTAGAACCCTGACGGGCACGACCGGTGCCTTTCTGTCTCCAGGGCTTTGCACCGCCGCCGCTGACCTCAGAACGAGTGAGAGTTGACTGTGTGCCCTGACGCTGGTTAGCCAGATAGCTGACCACTGCAAGATGCATTGCGGATTCGTTCGGCTCAATGGCGAAAACGGAATCTGCAAGTTCCAATTTAGAAGTTTTCTTACCTTCCTGGTTATAAACCTGAACCTGTGCCATTTTAATCTCTCCTTTCGTTAAGCTTTCACTGCGTCAGCGATGACAACAATGCCGCCCTTGGGGCCGGGAACGGCGCCCTTGATGGCGATGAGGTTATTCTCGGCATCCACCTTAACAACCTCGAGGTTTTGAACGGTTACGGTCTCGTGACCCAGGTGACCTGCCATCTTCTTGCCCTTAAATACGCGAGAAGGACTGGAGCAGGCACCCAAAGAACCGGCGTGACGGGCGTTGGGGCCGGTACCGTGGCTCATTCTCAGACGAGAGAAGTTCCAGCGCTTAATGGCGCCTGCGGTGCCCTTACCCTTGCTGGTGCCCTTCACATCGATCTTTTCGCCGGGAGCGAAAATATCAGCCTTCAGGATGTCACCTACATTCATTGCGGAAATGTCGTCCAGACGAAATTCCTTCAGTGTCTTCTTGGGAGCCACATCGGCTTTGTCAAAATGACCTTTCATCGGTTTGTTGACGCGTGTGATCTTCACATCGCCAAAGCCCACCTGAATGGCCTCATAGCCGTCGTTCTCCATTGTCTTCTTCTGGGTAATCGTGCAAGGACCGGCCTCCACAACGGTTACAGGGATTGCATGGCCCTGTGCGTCGAAGACCTGGGTCATGCCGATTTTCTTACCGATAAGACCTTTCTTCATGTTTATTCCTCCTTTGGTTATTGGTTGGGTCTCCCCAACATGACCTCGACCGGGTTGCGATCTGTTCTCAGTTCAATTAGAGCTTAATCTCGATCTCAACGCCTGCCGGGAGCTCAAGACTTGTCAGCGCTTCCACCGTCTTGTTGGAAGGTCTGAGAATGTCGATGAGTCTCTTGTGTGTTCTCTGCTCAAACTGCTCACGGCTGTCCTTGTACTTGTGTACAGCACGCAGGATGGTAACAACTTCCTTCTCGGTGGGAAGCGGGATGGGACCGCTCACCTGAGCGCCGGTGCGCTTTGCGGTGTCTACGATCTTCTCCGCAGCCTGGTCCACCAGGTTGTGGTCATAACCCTTCAGTCTGATGCGGATCTTAACTTTACTTGCTGCCATGTGAAATTCCTCCATGAATTTTGATGGTGCGAGCAACCATTGTTTGACTACCCACCCGTGTGTTTCAACCCTTACCGTAAATAAAGCCGAATGAAGGCAGTTCATTCGGGCACGGTTACACGGTGCACAGCGCGTTCGCAAGTCACGCTCTGCAGGGACCCCTTACGGTCCGCGTCGTACAATGATTCGTTTCGCCCGGTTTGAAATCGGACATACTCCGCCGAAATTACCGCTCTGGGTAGGAGCGCAACCTCCGGCATCAACGCATATCTGGTTGTGTGTTGCGGTGTCTATATATTATATATATAATACGCCCAATCACACGCAGGCAATATTATATTATATAGAGCCCCTGCTGTCAAGCCTTTTTTTGAAGTTCTTTGGAATTTTTTTCATTGTGCAAAATGACAGAAAATCCGGCTCCATTTTTGTAAAAATCACCAAAGCAGAACCACCGGTTTTTTGGTGTCTCTCCCTTGTCGAACCACAAGATGTAGTTACCGTTTTCCATATTTAGTAGGAAACGCCCCGCGCCGTGGAAAAATTCCGTCGCGTCGCTTTGACCGAATTTTTGAAAAATTTAATTTTCGGCAGCAAAAGTTATACGACATTGTACCAATAAAACAAACGCAGCGCCCAAGCCGATCGGCCTGAACGCTGTGCAAATCGCTATATTATAGTATGTTTATATATAAGGGCTACTTGAGCTTGGCAATGGTCACGCCGTTCTCACCCTCGCCGTACACCCCCAGCCGATACTCGGCCACATTGGGGTGGTGGCGCAGTTCTTCCTGTACGGCGGTACGCAGCGCGCCGGTACCTTTGCCGTGGATAATGCGCACCTCGGATATATTATTGAGCACGCACTTATCAATAAACAGACCCAGGTTGCCCAGGGCTTCCTCTACCGTTTGGCCTCGCAGATCCAGCTCGGTTTTTACATCCGCGTCTGCCCGGGAGGTGGTGCGCCGCAGAGTGCGCTGGCCGGTGATCGGCGCTTTCTTCTTGGGCGGCAGCAGGCGCAGATCCGTGGGTTTGACCCGCGTTTTCAGCATACCGGAGGAAACCAAGATCTTACTGCCCAGTTCCAGCACGTCGCCCTCACCAATGCCCTTGATGAGCACATGGTCCCCTACCTGCAAGGGGCGGGGCAACTTATAATCCGCATCCCAATCGGTGTTCAGCCGGTTGGGGTTCACAATATCGTCCAACTCACCCAAGCGATTTTTGATCTCTCGCCTGGTCTTGCGGGCCAATTCCGTAGCATTGGTGGCAGTCTGCTCTTTCTTCAACTGCTCCAGCTGGAGCAGGAAGTCCGAAGATGTGCGTTTGGCAGCATCTACCAGCCGCTGTGCCTCTCGCTTAGCCTTGTCCAGTTCTCGATCCCGCAGGGTGTCGATCTTGGACTTTTCTTCTCTGGCCTTGGCTGCAAGGCGCTCTGCCTCTTGCCGTTCCTTGGTCGCCGCTGCCCGCTCTTCGTCCAGTGCCTTTCGAGCGTTCTCCAGGTTCTCCAGCACAGACTCAAACTGCCGGTTCTCCGAGCCGACAATCTCCTTAGCCGCCCGCACGACCGCCGGATCCATGCCCAGGTGCTCCGTAATAGCAAAGGCGTTGGACCGACCGGGCACGCCGATCAGCAGCCGATAGGTAGGCCGCAGGGTCTCCACATCAAACTCACAGCAGCCGTTACTGACCCCCGGCGTATCCAGCGCATAGGCTTTCAGCTCCGCATAATGGGTGGTGGCGGCAATGTGCGCTCCCTTTTGGCGCAGATATTCAATGACAGACACAGCAAGCGCCGCGCCCTCGATGGGATCCGTACCGGCGCCCAACTCGTCGATCAGCACCAGGGAGTCTTTGTCCGCCTTTCCCATAATATCGATGATATTCACCATATGAGAGGAGAAAGTGGACAGGTTTTGGGCAATGCTCTGTTCATCGCCGATATCCACCAAGATTTGACGGTACAGCGCCAGTTTGCTGCCGTCTGATACCGGGATCAACAACCCGCAGCCCACCATCGCCGTCAGCAGACCCAGGGTCTTTAAGGTCACGGTCTTGCCGCCGGTATTAGGGCCCGTGATCACCAAAGTATCATAGTCTGTACCCAAGGTAATATGCACCGGCACCACCCGCTCTTTATCAATCAGCGGATGGCGGGCATTTTTCAAATCCGTTACGCCCTCGGTGTTCAGCTGGGGACGAGCGGCTTTCATTTGGTACGCCAAGTGCGCCTTGGCAAAGATCAGGTTCAGCCGCACAGCACTGTCATAACTGTGGCGCACGCTCTCTGCAAAAGTGCCTGCCTCTGCAGACAGCTCAAAGAGAATGCGCTGCACCTCTTCCCGCTCCCGGCCCTCTAACACCTTAATGTCATTATTGGCGTCCACCACCGCCGCCGGCTCGATAAACACCGTAGCGCCGCTGGAGGAGGTATCATGCACCAGACCGGGCACCTCGCCCCGGTGCTCCGCCTTTACCGGCACCACAAAGCGCCCGCCACGCTGGGTGACGATGGGCTCTTGCAAGAATTTTTGGTAATGGGTGGAGTGGATCATACCGTCCAGCCGTTGCCGAATGGCCGCCGCCTTGGCCTTAATCTTCCGACGAATGTCGTAAAGTTCTTCCGATGCCTTGTCCGCCATTTCCTCCGGACTGACAATGCAGGTAAAGATCCGGCTCTCCAAATATTTGTTCACCGTAATGCCGTCAAAAAAGAAATTCAGGGACGAGCTTGTGCCCGCCAAATGGCCGTGCCAGTCGTCCAGAATGCGCAGTGCCCGCAGGGTGTCGCCCACCTGCAGCAACTCCGTCATATTCAGGCACCCGCCGGCTGCCGCCCGCTGCAACGGACCGTTTACATTATGCAGCCCGCCAAAAGACGGCGCACCGAACCGGGCCAGCATAGAAAAAGCGTCCTCCGTCTGATCCAGCAGGAGAGCAATCTCCCCCGGGTCTGCCGCAGGGCGCAGCGCCAATGCCGCCTCTTTGGCGTCGTCACAGGTGGTCTGTTCCGCCAAAAGGGCAAGCACCTTATCCAGTTCCAAGGTTTGTAAATTTTTATCCATATCTCTATCCATTATGATGCTATGTAGTCGCGTCCCCGGCTTGCAGGGACTTGTAGAATTCCAGTGTGGTAAAGCGCCGGTCCAGCCGCCGCAGGGTGTACTGCTCCGTCACCCGGCCCAGCAGTGCCATTTGCTCCGGCGACAGAACAAAGCCAAAAATACGCCCCGGCTCCGTCAGGCAAATGTAGCGCACGGCGGTCATCACCGTCTTGGGTACCGCCACAGCGCCTGCCTTGGGGCAATTCTCACAGTAAATGCAGCCCCCGTCCACATCAAAGTACATCACCGGTGTTTCGTAAGTCCCGCAGTTGGCGCAGGCCAAAATATTGGGCATATAACCGGAGATGGACAGGGCGCGCAGCTCAAACACCGCCTTGATTTGCACCAGCGGCTTGGTGCCCTTGCACAATAGGTGCAGGGTGTTCAGCAGCAGGCGCAACAATTCCGGCGCCGGTTGTTCCTCCGCCGCCAATTCGTAGCTAAGTTGGGCAAAATATTGGGCAGCTGCCAGCCGATCAATATCCTGCCGCAAGCCAAAAAACACCTCAATGGGTGCCGCACTGTCTACCGTATAAGCGTCGCGCCCACGGTACAGGGCAAACTCGCCATAGCAAAAAAGAGAGGTGGCAGCGGCACGCCGATTCTTCAGCTGCTTGCCGCCTCGTGCAAACGCACGCACCAGCCCGTGATCCGCCGTCAGCAAAGTCACCAGGCGATCATTCTCCCCGGTGGTCTGCTCCCGTATCACTAACCCTTTGGTGGTACTGTTCATGCCCCTCTTGTCGTTCCTCTTCCTTGTATTTCAAATAATCGGCCACACGGCCGGTTTGTATAAACTGTTGCCAGCTGTTCTCTGCCATCGACATAGGATCACCGTTTTTATTGTATCCTATGCGTACAACGCCATTTGTGCCAAATTCATCCAAGGACAAAATCCAACACCGCAGCGGCAAAAAATCAATTTATTCGTTATCCAAACCAAAGTTGTGGATCAGGCCCTCACGGTTACGCCAGTCTTCTTTCACCTTAACCCAGGTGTGCAGATTGACCTTGATCCCGAAAAAGCGCTCCATATCCTGCCGAGCAAATGTGGCGATCTTTTTAAGCATAGCGCCGCCCTTGCCGATAACCATACCCTTATGGCTCTCCCGCTCGCAGTAAATGGTGGCGTCCACATCCAAACAGCTGCCGTCCGGGCGTTCCTTCATCTTCTCAATGGCAACGGCAATGCCGTGGGGAATCTCCTTATCCATTAGGCGCAGGATCTTCTCCCGGATCATTTCCGCCGCCAGCACCCGCTCCGGCTGATCCGTCAAGGTATCGTCCGGGAAGAAATGGGGCGACGGCTGCGCCAGGCGTTCCATCTCCGTCAGCAGATCCTGCATACCCTCGCCGGTCTGGGCGCTGCAAGGCACCACAGCCGTAAAGTCATACAGCCCGGCCAACTGGCCGATGCGGGGAGCCAGTTCCGTCTTGTCCCGCAACATGTCAATTTTGTTAATGGCCAGGATCACCGGCAAGCGCTGCTTTTTGCACATTGCCAGCAGTTCCTGCTCCTTGTCGTTGAGCTCGCCCTTCGGCTCCACCACAAACAGGCAGGCATCCACGCCGCCTACCGTGTCGCCTACCGCCTGGTTCATGTGCTCGCCCAGCTTGTTGTGGGCATGGTGAAAGCCGGGGGTGTCCGTAAACACCAGCTGCACCTCGTCCCGAGTCAGCACGCCCATGATCTTGGTACGGGTGGTCTGTGGCTTAGAAGACACAATAGCGATCTTGCTGCCGGTAAGTCGGTTCAGAATAGAAGATTTGCCCACATTGGGCTTGCCGATAATGGCGATAAATGCAGATCGGTTCATGACTCGTCTCCCATGTAATAGCTACTGTCCCGCTTCCAGCCAATTTGGGTCAGCACGGTTTCTTCCTTTTCGCGCATACGCACTTCTTCCAGTCCGCCCTGCTCATGGTCGTAGCCCAGCAGGTGCAGCATGGAATGGACGGTCAAAAAGCCGATTTCCCGCTGCAAGGGGTGATTATACAGCTCTGCCTGCTCCATGGCTTTCTCCATAGAGATCACAATATCCCCCAGCAGCTTGGCGCCGGTGTCGTGGTTAATGTCGTACACACCGTTCTCCCCCAGAGGGAAGCTAAGTACATCCGTCTCTCTGTCGATGTTCCGATATTCTTTGTTCAGCGCACGGATCTGTTCGTTATCCACAAAGCGCACGCTCACCTCTGCACTGCCCTCGAAATGCTCCAACTCCAGCACGGCGTGGCAACAACGGCGGATCAGCAACCGAATACCGGTAGGCACCTTCACTGCCTTTTGATCGTTTGAAATGACCACTTTTACAGATTCCATTACTTGTTTTTCTCCTCATATTTTTCATACGCCCGAATAATGTCCTGCACCAACCGGTGGCGCACCACATCCTTCTGGCTGAATTTATGAATTTCAATATCATCTACATGCTTTAGAATGTCCATCACCTTCACCAGCCCGGAGCGCTTGCCATCCGGCAGGTCAATCTGGGTAATGTCGCCGGTGACCACCATTTTGGAGTTGAACCCCAGGCGGGTCAAAAACATTTTCATCTGCTCCGGCGTGGTGTTTTGGGCCTCATCCAGGATAATAAAACTGTCGTCCAAGGTACGCCCACGCATATAGGCCAGCGGCGCCACCTCGATAGCGCCTCGCTCCTGGTAGCGCTGAAAACTCTCAGCCCCCAGCATATCAAACAGCGCGTCATACAACGGGCGCAGGTACGGGTCTACCTTGCTTTGCAGGTCGCCGGGCAGGAAGCCCAACTTCTCCCCCGCTTCCACCGCCGGGCGGGTCAAAATGATCCGGTTCACCTCTTTGGCACGAAAGGCGGTGACCGCCATTGCCACGGCCAGGTAAGTTTTGCCGGTACCGGCCGGGCCCACGCCAAAGGTGATGGTGTTTTTGGCAATGGACTCGCAGTACCGCTTTTGGCCCACGGTCTTTGGCTTCACCGGGCGGCCCTTGGCCGTCACGCACACCGAGTCCGTGGTCATGGAGGAGAGCACATCCTCGTTGCCCTCGCCCACCAGCGAGATCACATAGCGCACATTCTGCTCCGTCAGCTGCTCGCCTTTGTTAATTAGAGTCAGCAGTCCGTTCAGCGCCCGGGCAGCGGCGGCCACATTCTCTGCGTCCCCCACCACCTTCAGGTCTGCACCCCGGCAGGTGATGGTCACACCGTACTCCCGCTCCAATAGCTTTATGTTTTCATCGAAGCTGCCAAACAGGTTCGCTGCCTGTTCCATCGCTTCAAAGGTGATTACCTGTTCTGTCATACTCTAACTTCTGCCTTTATCCGTTCAATTCTGCGCTCCTCTACCCCGCAAACGGTAAAGTGCACATTCTCATAATCCACCGTTACCGGCTGGGTCTCCTTGCCGGTGGGAAGATAGCCCAGGCGACTGATCAAAAAGCCTGCCAGCGTGTCATAATCCCCCTCCGGCAAGGGCACGCCCAGCGCCTTTTCCGCGTCCTCCATATCTACCGAGCCATCAAAGGTGAAGGTGTGCTCCCCGGTTTGGATTACATCCGCCTCTTCCTCGTCGTACTCGTCCATAATATTGCCCACAATGCTTTCCAGAATATCCTCCATGGTCACCAGCCCGGCAGTGCCGCCGTACTCATCTACCACAATGGCCATCTGAATACGCTTGTCCGTCATAGTGGCGAACAGCTTGCCGCAGGGAATACTCTCCGGTACAAACAGCGGCTCCCGCACATAGTCCGTCAACCGGGTGCCCGCCGGCACAGGCTTACCCACAAAGGGCAGCAGGTCTTTTACATAGAGAATACCCTGCACATTGTCCAGATCCTCGTGGAATACCGGGATCCGGGAGCACCCTGCCTCCAATGCAAAGGCAGCGGCATAACCGATGGTGGCCGTCTCCTCCACTGCCTCGATCTCTGTGCGATGGGTCATAATATCTTCCGCACAAAGTCGGTCAAAATCAAAGATATTGTGGATCATCTCCCGCTGAGACGCTTCCAGTTCTCCTTTGGCCTGGTCCTCGTCCACCAGCTGGCGAATTTCCTCTTTCGTTGTGCTCTCGCGCTTAAATAATCGGTCAATCAGGCTGTTCCCGCCCATAATGGCCCCTGCCTCCTGTGCAATACAAATTTTTCCATTTATTTATTATATACACTTTATTTTAGATTGTCAAATATGTTAAGATATAAGGCAGAAAGGCAGGTAGCTATGATAGACGATTTGCTGACGGAAGAGAATGTTTGGGACCGACTGCGCCGGGAGGGCAAGCCCCTGGTGCTCTATGGCATGGGCGACGGGGCGGAGAAAATCAATGCCGTGTTAGAAAGCAAGGGAATGCACATCACTGCGGTCTTTGCCAGTGATGATTTTGTGCGGGGCCAGTCTTTTTTGGGCCACACGGTGCAGCGCTACCGGGAGGTGTGCGCGCAATTTACGGACTTTAATGTGGTACTGGGCTTTGCCAGCCAGCGTCCGGAAGTACTGGAAAACATCGCCCGGATCAATCAGGAGCACCCGATGTATGCACCGGATATTCCGGTGGCCGGTGTCGGGCTGTTTACCCGGGAATACGCCGCTGCCCACCGGGCGGAAATAGAGACTGTTTACGCCAAATTGGCCGATGAGGAGAGCCGCCGGGTATATCATTCCGTATTGCGTTACAAAATCAGCGGTAAAGTTGATTACCTTTACAATTCGTTTGCAAATATGGACGAGATTTTTACCAAAATTTTGCAAGTGAACCAACAGGAGATTTTGGTGGATATGGGCGCTTATAACGGCGACACAATTCGCCAATTTTTGCAGTATTCGTGCGGAAAATACAAATCCATTTACGCCTTGGAGCCGGATGGCAAAAACTTCAAAAAGCTGTGCCGCTCCACCGAGGGTATGCAAGGCGTTCACCTTTACAATAAAAGCGCCTGGGACCGGCAGACCACTTTACATTTTAATGCCTGTGCCGGGCGCAATTCCCACCTGTCGCCCACCGGTACGGCGGTGGAAGCCACAGATCTGGACAGCCTGCTACAAGGCGCGCCGGTGACCCTGCTGAAAATGGACATTGAGGGCAGTGAAAGCAAGGCGCTGACCGGCGCCGCCCACACCATTATCACCTGGCGGCCCAAACTATATGTATGCGCCTACCATCGCAACGAAGATTTGTTCTCCCTACCGCTGCAAATTCTGAGCCTTTGCCCGGACTACCAGCTGTACTTCCGCCACAGTCCGTACATTCCGGCGTGGGAAAGCAATTTTTACTGTATTCCGACCCATTTGGACGACAACGACCATTAACGCCCCGCTGCATTGACAAGGCCCTTTACAAATTATATAATAGATTTCACGGCTTATGAAAAGAAGCGTCCTCTTTGGAGGGCAGTTAGGAATGTCTATGCTGACCATCGCAATACCGCAGTTCGTAGAGAACCTGCGCAAAAACATACAAGGGGTAGAAACCACTGAAGAACTGCTGATCCGCACGCTGATCGCTGTGGGGAGCGTTGTGGTGCTGCTTCTGTTACGAAATATCATTTCCGGGGGAATACTTACCGTCATTGGCAAGACCTTTTGCCGCCGCAAACCCCGGGTGCAATCGCTGATTAAAGACGGACTGAAAAAGCCCCTGGCCTTTTTCTTGGTACTGGCCGGCATTGCCCTGGGTCTGCAAATCATTGCCCCCTCCGGAGAGCTACATAAGATTGGCCTGTTTCTCATTAAGGCCGGCGGCATTGTGTGCGCCTGCTGGGGCGGCGTACGCCTACTGAACGGCGAGCTGGACAATTATACCTTTGACACGGCAGCCGGCGAGGACAAAACCCGGCTGACCGCCTTTCGCTTTATCTCCAATGTAGCCAAGATCGTGATTATCTGCATCGGCGCACTGCTGGTGCTGGAACTGCTGGGCTACTCCGCCACACGCATTTTTGCCGCTTTAGGCATCGGCGGCGTGGCTGTGGCCTTTGCCTGTAAAGATGCGGTGGAGAACCTGATCTCCGGCTTTATCATTGTATTTAACAAGCCGTTCCGCGTGGGGGACTTTATCGCCGTTGGAGAATTAAGCGGTACGGTGGAGGACATTGCCGTGCGCTCCACCACCCTGCGAGCGCTGGACGGCAGCCGTTATGTGCTGCCCAATACAGCCCTGACCAATCAGAGCATTATCAACTATGCGGATATGGAAAAGCGACTGATCGACCAGACTTTCACTTTGCATTATAAACACAGCCGCACGGACTTAGAGCGGTTTGAGCAGGATCTGCGAGCACTGTTGCAGGCCGATCCGGCAGTCGTACAGGACGATATTCGAACAGATTTTGTGAATTACGGCGCCCACGGCATGGATGTGCAGGTGTACTATTATGTGATCGCCCCCACCGTAGTGGAGCTGGGGCAAATCAAAAATCGTTTGAACCTGCAAATCAAAGAGCTTCTCGACAAAGAGGGCTTTGAACTGGCATACAATTCTGCCACTGTTTACTTAGAGCAAGAGACGGAGGGCAAGGATCAATGATGTTTGTTGTTTACGGCGTAATTATCTTTCTCGCTTCCGGCATCGGCGCCTTTTTAGGCGGTGGCTCCGGGGTGATTATTAAACCGCTGCTGACCCTGCTGGTAGACGACACCACCGAGGTCATCAACTTTATCTCCTCCGTGTCCGTTTTTGCCATGAGTTGCAGTTCCACCGTAAAGCACTTGCGCGCCAAGACCAAGGTGGACTTTAAGACCGTGCTGCTGATCTCTGCCGGGTCTATTTTAGGCGGCTTTGCAGGCAAGCACATTTTTGATCTGTTTAACCGACTGCTTAGCGACAACCTGGCTATGGCTTACCAGGCTGTAATGTTGGCCTGTCTGCTGACAGTGGCCCTATGGTATGTGAACAAGGGCAAAAAGAGCTTTCACTTAAAGAACCCGATCACCATTCTTCTGGGTGGCGTCGTGTTGGGCATTCTGTCCAGCTTCTTGGGCATTGGCGGCGGGCCCATCAACATTATGTTCTTCCTGCTGTTCTTCTCTATGAGCATGAAGGAAGCTACTGTGTACAGCGTGGCCGTCATCTTCTTTAGCCAGCTGTCCAAGCTGGTGACCTATGTAGCCACCGCCACGGTGCCCAAGTTCGACTACCGCATTCTGCTAATTGCGGCCCCGGCAGCTGTAATCGCCGGTATCATTGGCGCAGCACTGAATAAAAAGGCCAACAACAAGATCGTCACCCGGGTATTTTCCGCGGTGCTGGGCGTATTTATCTGCCTGAATATCTATAATGCAATCACCGGCTTTATGGCCGGATAAATAAAAAGACAATACGCTGCGCCCACGGGTGCAGTTCAGGAACAGGAGTTGAACATGGCAAAGCGTAAGAACATCATCTTCTACTTCAGCGATCAGCAGCGGTGGGATACCGTCAATGAAACGGTGACCCCTAACCTGATGCAGCTGGCCAAAGAGGGCACCCTCTTTGAGAACAACTTTACCTGCCAGCCGGTGTGCGGCCCGGCCCGTGCCTGCCTGCAAACCGGTGTGTATGCTACCCAGTGCGGCTGCTACTGGAACGGCATTCCCCTGCCGGAAAGCATTACCCCGCTGGCCCATTACTTTAACGAAGCCGGGTATGACACTGCTTATGTGGGCAAGTGGCACTTGGCCTCTGACCGGCTGCCGGGGATCGGCACCCACTGCGAGGCCACGCCGGTACCGAAAGAGAAGCAGGGCGAGTACCGCTACTGGCGGGCAGCGGATGTGCTGGAATTCACCAGCCACGGCTACGACGGCTACATATTTGACGGCGACGGCAACAAGCTGGACTTTACCGGCTACCGGGCTGACTGTATCAACGACTTTGCCCTGGAATACCTGGAGAGCGGACGGGAGGCAGACAAACCCTTCTTCCTATTTATCAGCCAGCTGGAGCCCCACCACCAAAACGACCACCATCATTACGAGGGCTATAAAGAGACCGTCAATCAATACAAGGACTATCCTCTGCCCCCGGACCTCACCTTCCTAAAGGGCGACTATAAAGAGATGTACCCGGACTATATCTCCGCCATCAATCGGTTGGACTATAATGTGGGCCGCCTGGTGCAAAAGCTCAAGGATCTGGGCATTTATGACGACACGGTTATCATCTACTCCTCAGACCACGGCAGCCACTTTAAGACCCGCAATTTGGAGTACAAGCGCTCCTGCCACGACAGCGCCACCCACACCCCGCTGATCATCAAAGGCGGCGGCTTTGACGGCGGCAAGGCAGAGAACCGGCTCACCTCCCTCATCGACCTGCCCCCCACTTTCCTGAGCCTGGCGGGCATTCCCATACCGCCCAATTACATGGGCAAGGATCTGTGCCAAATGCAGCAGACGACACAGCCGCTTCACGACTGCGTATTTATGCAGATCAGCGAAAGCCAGTGCGGCCGCGCCATTCGTACGGACCGGTTCAAATACGCGGTGCGCACCTTAGCGCCTACCGGCTATCTAAAGTACAATGCCGGTGTATACTTTGAGGATTATCTTTATGATTTGGAAAAGGATCCCATTGAGCGCTGCAACCTGATTCGTGATCCCCGTTACAGCCATGTGCGCCAGGAGCTGAAATACCTGCTGCTGCGTGAAATGAAAAATGCCGGAGAAGCCGCACCTGTGATTCTCCCCGCCCTGAAAGTGAGGAAAAAATAATGAACGAGCCCCAAAAGAAATACCTAACCACCAAGGAGCGGATATGCTTTACCGTGGGTGCCTTCGGCCGCTCCGGTATTTATACGCTGATGTCCATGTTTACCTTGGTATTCTTCCAAAACGGTGCCGGGCTGTCCCTGTCTCAAGGTACCACAATCATCTTGATTGGCCGTATCTTTGACGCTCTCAATGACCCGGTGATGGGCATGATCGTAGATCGCACCAAGTCCAAGTGGGGCAAAATGCGGCCCTATCTGCTGTTTGCACCGGTGCCCATTGCTATCTGCACCATATTGCTGTTTACTGCGCCCTTTAAGGAGGGTTCCACCGCCGCTTTTGTGTGGGCGCTGATCACCTACATTCTGTGGGGTGTGGCCTTTACCGTGCAGGACGTGCCTTTCTGGGGTCTGTCCTCTGTAATTACCCCACTGGAAAGTGAGCGTACTTCCTTTATTTCCACCGCCCGCCTGGGCTCCACCTTCGGTGGCATTCTGCCGGCGCTGCTGGTGCCCATTCTGTACCAGAGCAACATGGGCTATAACAAAGGTTTCTTTGTAGGCGCCCTGATCTTTGCCCTGCTGGGCTGCGGGCTGTCCATTCTCATCTTCTTTGTATCTAAAGAGCGCGTGCCCAAGATGGACCACACCCCCTCCTTCAAGGAGACTTTTGTGGTACTGGGCAAGAACAAGCTGCTGCTGATCGTTATTGCCGCTTCCGTTCTGGGCTCCACTATGGTTACCGCCAACCAATGCGCGGACTATATCGGCAATTACATTATTATTCAGAATTATACAGACTTCCGCCAGATCTTTATGGACTTCCTGCCCGGCGCACAAAGCACCCTGGTACCCAATGTGGACGCTGCGGCAGCCTATGACTTCTGGATTCCTCGCGGCACCATTGTGACCACCCTGACCGTAGCCATCGGCGTGGGCATGGTGCCGGCCATGGCCATCTTCCCCCTGCTGCGCAAGAAGTTCAGCTTAAAGCAGATCTACATCGGCTCCGCCTTGTTCGGCTTTGCCGTGCACGGCCTTTGCTATGTGATTTTGGCACAAGATGTAACCAAGATCAATATCTTTATCCTGTGGATTTTCCTGTTCCTGATGGGTCTGCCCCTTGGCATTTACAATGTGATCACCTACGCGCTGATTGCCGACTCCATCGACTATTTGGAGTGGAAGACCGGCGAGCGCCAGGAGGGCGTGTGCTTTGCATTCCAAACCTTCCTGTCTAAGGTGAACGCCGCGATTGCCACTTTCGTGTTCGGTCAGTTGCTGGCGCAAACGGACTTTAAGGCCGTAGACAAATCTCTGATGGATAACGCCGGGCGTCAAATCTTCTTTGAGCAGTCTGCCAGCACCCAAAAAATGCTGCTGGCGCTGGTGACCATTGTACCGGCTGTGGGCTTTATCCTGACCATCATTCCCATGTTCTTTAACAAGTACACCGGCAAAGTAAAGGCCCAGGCCCAGGCTGAGCTGGAGGCTAAGCGCGAAAAGCTGATGGAAAGCGAAGAAGCCTAAATACCCTGAAAATCATAAAAAGCGCTTCCTGCGGGAAGCGCTTTTTATTACCCATTTCTTTGTATTTCCTTTTTGCAGTAGCGCACGCTGTTCTTGTTCTTTAGAGCAGTCCGAGAGCGGCTGTATTCACGCTTTTTGTCTTTTGCCTATCCCGGGGATCAACGATCGGTAAAAAGCGCACAGAGGGATTGTTGTGCCGTCCTTGCGCAGTCTTGGAAACCTCTTTTCTAAAGGGCAAGGCATAGAACGCACAAAAAAGCACCGCCGCAGCGGTGCTTTTGTTTTTATTGGTTGATCTTATTCAGCGCTGTCGTCACCCTTAGCGGCGCGCTTAGCCACCAACTCACTCAGGATACGGCTATGTTCTTTATCGGACATTGCATACTTAATGGTGGGCAATGCGGAGAGAACCATACCGATGGCAGGCGGAATGGAGATCAGGAAGAACATGGTGGCGGCGTACTTACCGGCGCCGGAACCACCGTCATAGCTCAGGAAATCTGCGCCGCTCTTCAGGGCTTCATTCAGCTTCAAAATATTGGCGTCACTATAACCTACAAAGTGGTACACCACAGCAGACAGGATAGAGGCGATACCGCCGGACAGCTTGGTGATAAAGGACTGGCCGGAGAAGAATACACCGTCGGTACGCACGCCGTTGTGGTACTCCTCGTAGTCCACGCAGTCGGCGATCATCACGGACTGAAGCACATTGATACCACCCATGGCAGCGCCTGCAAAGAAGAAGCACAGCCCGGTAAGGACCACCCATACCATAGAGGTCTTTACATCGCCGTGGGCGATCTTAAAGAACACATACAGCAGAGCAAAAGGCACGGCGCCTGCAACGGAATAGAAGTTATAAACGCTCTTTTTCTCGTGCTTGCGAATCAATGACGGAGTAATGCCCATAGCGATAAACTGACCCAGGAACACGGCAGCGGCGATCACAGCCAGGCGCACCAAAATGCTCCAGTTAATACCCACCATAGCACCGGTATCGTCTGTTTTCAACACATTCATAAAGTCGCCGTTGGCGTAATAATAGGTAATCAGCGTCATGGCAATGAGCATGAGCAGCTGAATGGGACTTCTGAGAATACCGGAGATCAAAATCTGGCGGAACGGCTTGTTCTGGAACATAATTTTGAAGTTCTCGGTAAAGGTATATTTTTTCTCTGCCTGCTCCACCCGCTCTTTGGTGCCGATGCCGGCAAACTCAAAGAGAACAGTGGCGATCACGGTCATAATAATCACGGTCAGGATAAAGCCGTACTGAGAAGCCTTGGCCTGAGAATAGCCTTTGCCCTCAAAAATACCGCCTACAACCTGGGCAATCTGCACCACCAGCACACCAACGCCGCCGATACCGGCAACGATACGGGCCAAGCCCAGCAGCTTGCTGCGGTCGTCCTCGTCCTCCGTCATCAGGGAAGTAATGCCCCACAGCGGAATATCACACACGGTAAAGCACATACCCCAAGCGATGTAAGACACAGCAGCCCAAGCCACGATCAGCACCTTTTGGGTGTTTGAAGTGGCAGTGGCATAGTTGCCGTTGAGGAATGCCAAAACGGTGACCACGCCGATAATGGCAGGGAAAATAATCAGGTACGGACGGCATTTGCCCCACTTGGTACGGGTGCGGTCCACAATGGTGCCCATCATCGGGTCATTGATGGCGTCCCACACACGAGCCAGGGCAAAAATCCAGCCCAAAGCCATTGCCGGCAGGCAAATTACATTTTGGAAATAGAAATACAGACCTGTGGCTACAATGTTGTAGATCAGGTTTTGACCCAGCATACCGGTGAGGTACATATTACGCTCTTTTTTGGTATAGGTCCTTGTTTGGTTTGACACTTTATCGAGTCCCCCTATATTTTTTCTTCTATTTTACCAGTATGTGTGGCAAATAGCAAGTATTATTTGTGCAAAAACGACAGTGTACGCCAAAATGCAAGACATTTGTCCACTTTGCAATTTTACTTACAGCCGCAGGGACAAAGATACGGTGTTATGGCCGTAATCGTAACTCTCTGTAAAGCCGTATTTGCGATACATTTTGTACCCGGCGGAGTCTCGGCTGACCCCGCAGCAGGAAAGGCAGTCTACGCCCCGCTCCCGCAAATGACAGCACAGGGTGTCCATTAGCCGTGTACCCCACCCCTGCCGCTGATAGGGCGGCAATATATCCAGGTGGAAGTGCACCGGCCGGTTCTTGATTTTGCCCAGGCACCACAAATAGCCCAGCAAGCCCGCCGCCTGATCCGGCGCTGTGCGCAACACCCGGCGCAGATAAGTGGTGCGGTAGCGATGCGCAAAGCCCCGGTAGTCCGCAGCACAGAGAATGTACCCCACCGCCTGATCGCTTTCGTCCGCCAGCACAAAAATATGATCCGGCTCGTAAGCAGTAAAATAGTCGTTATAAATCAGCGTTACCGCCTCTAAGGTGCGCCCGGTTCTTTGAAACGGCTTGGCCGCCGTCTCCCGGCAAATTTGGCGCAGCCGGTCCCGGTCCGCCGGGCGATAGGGTCGAATGGTCATAAAGCCTCCAAATATAGCAAAAGCCTGAGAGCCGCGCAGCCCTCAGGCTTTATTGGTTTCATCAGTTATCTGCGGTTTCTTCTGTCTGGGCATTACGGCGCTGCACCAGCGCTTCCAAAATGGTGCGGTGCTCCTCGTCTGTCATACCGTAGTGACGCAGCGGAATGATGGACAAAAACAGACCGATAGCCGGCGGGATAGAACACAGGAAGAACATCATCCCCGCATACTGGGGAAACTGATCCTTAAAGGACGCACCGGCACGCAGAGCCTCGTTGCAGGCGCTTACATTGTCGCCGCTAAAGCCCACGATGGAGTAGCCGACGCCCTGAATAATGGAGCTGATCCCGGCGGACAGCTTGGTAATAAAAGACTGGCCGGAGAAGAACACACCGTCCGGCCGATAGCCCTTGTGGTACTCCTCATAGTCCACCGCGTCGGCGATCATCACAGACTGGAGCACACTCAAAGCGCCTATGCCGCCGCCTGCCAGGGCAAAGACCACAAACAGGATTGCCACCCACAGCGGCTGATCCAGATCCCGGGGCGCCAGCAGGTACACCGGGTAGATCAGTGCAAAGGGAATGGCGCCCATAATGGTAGAGCCGATGAGCATACGCGTTTTATCGTGCTTCTCCGCCAGCTTGGGCACCAGCGCCATGGCGATAAACTGACCGCCGAAAATAGCGCCGCCGAAGATAATCATATACAGCATATAATCGCCAAAGTAGTTGCCGTAGTAATAAGACATCAGGGTCATGGCAACAGACAGCAAAATCTGAATGGGCGAGCGCAGCACACCGCTAATCAGCTGGTTGCGGAAGGGCTTGTTGCCCCACATGATCTTAAAGTTCTCCTTAAACCCGAATTTTTGCTCCGCAGAGGGCACACGCTCCCGCACAAAAACACCGGTCATCTGGAACATACCACAGCCGATTACCGTTAAGATCACTGCCACGATGATAAAGCCCATTTGCTGGCCCTTCAGCACAGAACCGGCAGCGGACTCCAACTTTTTCCCCAGTGCCTGAGACAGCGGATTGATGGTCAGCAGCACCACGCCGCCGCCCAGGCCCGCTGCCATACGGGCAAAGGAGAGAATGGACGCCCGGTCCTTCTCTACCTCTGTCATACGGGAGGTCACGCCCCACAAGGGAATATCCCCTACCGTGTAGCACATACCCCACAGGATATAAGACACGGCAGCCCAGCCCACGATCAGGGCATTCTTGCCCGGGGTGTTGGCAGAGCTATACATACCGTTACAGAAGGTCAGTATGGTGATCACCATAATAACGGCCGGTGAAAACAGCAAATACGGTCGGCACTTGCCCCACTTGGTGTTGGTGCGGTCCACAAAGGTGCCCATCATTGGGTCGTTAATGGCGTCCCACACCCGCGCCACGGCCATAAAGATACTGATGGCCATTGCCGGAATAAAGATCACCGACTGGAAGTAGAAATACAGCCCGGTGCCGATGATGTTGTAGATCATATTCTGACCCATCATACCCACCAGGTACATATTCCGTTCCTTAGCCGTATATGTACGCACTTGACTAGACATAGAAATCCCCCTTTGCCTTTCTATATTACCAGTTTTATCATCGCATCGCAAGCATTATTTGTCAATTTTGCACAAAAGCGACAAAAGGGGACAACCGTCGTTTTAGATGTAATAATACCAGTAGCTGCCGCTGCACAGGGCGTAAGACTTGCCGGTGGCTTTTTCTTTGAGCACATACCGGGCAATATAACGATAGCCACAGTCGCTGTCTCTCGGCTTTTTGGGTACAGTACAGGTGATCTCTATGGAATAATTTTGATAATCCGCCACAATCACCGGTTTTGTCGAGGGTTCGGCATTTTCTTCCCGTGGCTCTGTTTTGGGCCGGTGGTTGGTGGGGGTCATTTTGCCCTTATAGTCCAGATGATAGCACGAATCCGTACCGCCGTTGTTGGTCAGCAGGTACGCCGCGCTGTCCGACCAATCATAGAAGTAGGCACGATCCGTCTCCAGACCGGATTGCAGCACCTTGTCCTCTGCGGCTGTGCAGGCGTGCAGCTCACCTTTGCCGCTTTCGTCTGCGCTCATACCGTCCTGGTTCCGCGTGTTGCACAGGTAGAACAGCGTGTACCCGCAAGGGGCCAACGCCACCCCGTCACTGGTATTGGGCGTGGCGTAAATGCATGCTGGCCAATCCTTGTTTATATCGTAAGCATACAGACAAAAGCCCCACTGGGTTTTGTCCGTGTCAGTATAAGCATAGCAGGTAAAATACAGGGTGTTGCCTATGCGGCACATCTGCGCAATATCGCTCACCCCGTCCAGCACCGTGCGGGTCTTGCCGGTCAGCAGGTCATAGGCCATCAGCTTTTGGGGCGTGCCAAAGGTGTTTTGCTCATCGGTATCCTCCGTGGCATAATAGAATGTATCCGCCGTCAGGTAAATATTGCTTTGGGGCTGGAGTTGGTTCTCTGTCTGCTGCTGCAGTGGCTTGTCAAACCGAGCGCCTGCCGGTTGGGCAGTATTTGCCTTGCCGCAAGCGCACAGTGCCAATACCGATACCACACAAAGTAAGAGAGCTAAAATCCGTTTCACACAATCATCCTTTCTGCCCGGGGGGACAACTCCAGTATAGGCAGCAGAGCGCCCATTTGGCAAGGCACGGTGCGTGGAAATGACTCCACCCCCGGTGGAAGAACGCAAAAAAAGGCGCCCCGGCACGTGCATACAAGCCGGAGAGCCTTTCGTTTTTCGTTTTAGTCCTTCACAGTATAGCCTTGGTCCTCAATGGCCTTTTTTAGCACAGCGTCATCCACATCGCCGTTTAAGGTCACCGTGGCGGTACCGTCCGTGTGGCTGGCAACGGCGCTGTCCACCTGGGGCAGAGCCTCCAGCGCTTTCTTTACCGTCATCTCACAATGGGGGCACATCATACCCTCCACTTTCATTACTTTTGTCATTGCAGAATTCTCCTTTTCCATAGGCAGTGCTGCCAGCACCACCGGGTGTTTGATTTTCTTATCCCGCTTGGGGGAATACAACTTAAAGAGGTTCAGTCGCAGGGCGTTGGCCACCACGCAGAAGCTGGACAGGCTCATAGCCGCCGCGCCGAACATAGGGTTCAAAGTCCAGCCGAAAATGGGGATCCACACCCCTGCCGCCAAAGGAATACCGATCACATTATAGAAGAAGGCCCAAAACAGGTTCTCATGAATATTGGTCAGTGTGGCACGGCTTAGGCGAATGGCGGCGGTCACATCGCTCAGGCGGCTGTGCATCAGCACCACATCCGCCGCATCAATGGCCACATCCGTACCGGCGCCGATGGCCATACCGATATTGGCTCGGGTCAGGGCCGGCGCGTCGTTAATACCATCGCCCACCATAATGACCTTGCCTTGCCTCATCAGGTCGCGCACCACCTGTTCCTTGCCCTGGGGCAGCACGCCGGCAATCACCCGATCCACTCCCGCCTGCCGACCGATCGCCGCAGCGGTGCGGGGATTGTCACCGGTGAGCATCACCACACGAATGCCCATCTTTTGCAGTGCTGCGATAGCTTCCGGGCTGTCCGGCTTAATCACATCGGCAACGGCGATCATACCCAGCAGTGCGCCGTCATAGGCAAAGAACAAGGGCGTTTTCCCCTGCTCCGCCAGCGCTGCCGCTTGCTGTTCCATATTATTCGGCATCGACACCCGACTACGCATATAGCTGAGACTGCCACCCAGCAGCAGTTTGCCGTTCAGCGTTGCCTGCAATCCATTGCCCGGCAGCGCCTCAAAGTCCGTGACCGGTTCCGGCGTAATTTGCCTTTCCGCGCCGTATGCGGTCACCGCTTTTGCCAGCGGGTGCTCACTCTTTTGTTCCAGCGCACAGGCCAGCGCTGCCAGACGGCTTTCTTCCACCCCGGGGACAGGTACCAAGTCCGTCACCTTAGGCGCGCCCTCGGTAATGGTACCGGTTTTGTCCAGCACCACGATCTGCGCCTTGCCGGTCTCCTCCAAAGACACAGCGGTCTTAAAGAGAATGCCGTTTTTGGCACCCAGCCCGTTGCCTACCATAATGGCTACCGGCGTGGCCAGTCCCAATGCGCAAGGACAGCTGATCACCAGTACGGAGATCCCCCGGGCCAGCGCATAGCCAAAGCTCTGACCGGTAAGCAGCCACACCACGGTGGTCACCAGGGCGATGGCCATCACCACCGGCACAAACACGCCGGACACCCGATCGGCGATCTTGGCAATGGGCGCCTTTGTGGCGGCAGCGTCGCTGACCATTTGAATGATTTGGGACAGAGTGGTGTCCTCCCCCACCCGAGTGGCACGGCACCGTAAGTAGCCGGAGGTGTTCACCGTGGCGGCAGACACCGGATCGCCCACGGTCTTGTCCACCGGCACGCTCTCACCGGTGAGGGCGCTTTCGTCCAGCGCACTGCTGCCCTCCAGAATGACGCCGTCTACCGGCACATGCTCTCCCGGCCGCACGACAAACTCCATACCGCACATTACCTGTTCAATAGGTACTGTACGCTCTTTCCCGTTCTCCAGCAGCACCGCCGTCTTGGGGGTCAGCTGCATCAAGCGCTTCAGCGCGTCTGTGGTCTTGCCTTTAGAGCGAGCCTCCAGGGTTTTGCCCACGGTAATCAGTGTTAAAATCATCGCGGCGGACTCAAAGTAAAACTCATGCATATAGTGCATCACGCCGTCTGCATCGCCCGCCACCTGGGCGCCGGTCATGGCAAACAGCGCGTAAGTGCTGTACCCAAAAGCCGCAGCCGCGCCCAGCGCCACCAGGGTGTCCATATTAGGCGCCCGGTGCCACAGGCTCTTAAAGCCGCTGACAAAAAAGCGGCCGTTGATGATCATAATAATAATGGTCAGCAACATTTGGAGCAGCCCCATGGCAATATGGTTGCCCTCTAAGGCCGACGGTAGCGGCCAGTTCCACATCATATGTCCCATGGAAAAGTACATTAAAATCAGCAAAAACGCCACGGAACTGATCAGCCGCCGCAACAATTTTGGCGTCTCTGTATCTTTCAGCGGGTCTGCCGCCGGCTGCGGGGCAGCGCCGCCCTTTTGTTTTAAGCCGGCGCCGTAACCGGCCTTTTCCACAGCGGCAATGATCTGTTCCGGGGCGGCCGTACCGGTAACGCCCATTGAATTGGTCAGCAGACTGACGGAGCAGCTTTCCACCCCGGGCACGGCGCGCACCGCTTTTTCCACCCGGGCACTGCACGCAGCGCAGCTCATCCCCGTCACATTGTATTGTTCCAAACTCTCACCTCCCGGCGCCAATATGCGCCGCTATCTCATCAATTTTTGCAATGTGGCCAGCAAATCGTCCAGCGTTTCGTCCTTGCCGGCCTTAATATCCTCCGCAACACAGGTGCGAATATGCGTGGACAGCAGTTCTCGGTTAAAGGCATTCAGCGCCGCACCGGCCGCTGCGGACTGGGCCAAAATATCCGTGCAGTAGGCGTCCTTCTCAATCATACCCTTGATCCCGCGAATTTGGCCCTCAATGCGGTTCAGTCGATGGATCAGCCGCCGGTACTCCTCCGGGTCCCGCACTTTCTTCTTCGCACAGCAAGCACAAACCGGCTGCATTTCGTCTTTATCTGCCACAACAGCACTTCCTTTCTATACCCCCATGGGGTATTTTTACTATATACCCCCTATGGGTATTTGTCAACCCTCTTTGAACAAAAAAATACCGCCCTGTATCAACAAGGCGGTTCGCGTTTAGATCACATAGGAGTAATCGTCATTTTTGTGCTCCTGCTCCAGCAGGTCTTGCAGGGTAATGCTGTCCAGGTAGGTATTGATGGCTTTATACAGCCCGGCCCACACCGGCAGCGTAGCGCAGGAAGCGGCGCGGGGGCAAGTGTTCGGCTCCTCCTCCAGGCAGGCCACCGGCGCCAAGCCGCCCTCTGTCAAACGAAGAATATCGCCAACCGTATACTGGTCCGGGGTCTTGGCCAGACGATAGCCCCCCTGGTAGCCCCGGTTGGTCTTTAAGAAATCCGGGCGGTTAAGCACCGCCACGATCTGCTCCAAATACTTCTTGGATATATCCTGACGGGCGGCGATCTCCTTCAGCGACACAAAGCCCTGTTCCCTGTGCTCGGCCAAATCTAACATCATACGCAGTGCGTAGCGTCCTTTGGTAGAGATTTTCATACCGTCACATCCTTTCTTTAACCTATAATACCATATATTTAGTAGGTTTTCAATACCCGAGATAAAAAAGAAAAAAGCACCCGACAAATGCCGGGCGCGAAACAGGTTTATTGCAATTTGGAAATTTCGTCCACAAAGGCACTGGCGCTGTCAAACTCCTTGTAAACAGAAGCAAAGCGCACATAAGCCACCTCGTCGATTTCCCGCAGCTTTTCCATAATCAGCTCGCCGATGCGCACGCTGGTGACCTCACGATCCAAGGCACTTTGCAGAGTGGTCTCGATCTCAGAAATCGCAGTCTCCAGAGCCTCTACGGTCACCGGTCGCTTTTCGCAGGCACGGAGCATACCTTTCAGAATTTTGTTGCGGTCAAAGACCTCACGGCTTTTGTCCTTCTTCACCACAATAATGGGCACATCCTCAATGATCTCATAAGTGGTAAAGCGCTTGCCGCACTGCATACACTCCCGACGACGGCGAATGCGCTCATTCTCGTCGGTAGGACGCGAGTCAATCACTTTGCTCTCTGCATAACCGCAAAACGGACACTTCATAGTTATCCCCCCTGTTGAAAGATACGGCTCTTGCCATAAAATTCTGTACAATCCGTACTATACCATAATTGGCCAGAAAAAGCAAGTTTTTTGCCTTTACACCTTTTTGGCAGGGGTGGTGCCGTCTGCCTTACGATTATAAAAGAACATCCACAGCGCCATACCGCAGATTACCGCGTAGCCCACAAAGGACAGCACATCCGGCACATCGCCAAACACCAAATAGCCCACAACGGCCGCAAAAATCACCTGGGCGTAGTCATACACGCTGATCTCTCGGCTGGGAGCATGGGTATAGGCGGCGGTAATGGAGAATTGCCCACCGGCGGCGCAAGCGCCCGCCAGTAGTAAGGTCGCCCATTGTTGCCAGGTCATATAATGATAGTTAAACAGCAAAAACGGCAACATCGTCGCACTGGAAAAAGCGGAGAAGAAAAAGACGATCAACCGTCCGTTCTCGCCCCGCAGCCCTAAGTACCGCACGCAGGTGTACGCCCCGCCGGCAGCCATACCGCCTAAGAAGCCGCAAACACTGGCAAAAAAATTTGCATTGGCAAAAGTGGGTTTAATAATGCAAAGTGCCCCTAAGAATGCCACCACAATAGCAATCGCCTGCTTGGGCCGCACTTTTTCTTTAATGAAGATCGCAGAGAACACCAGGGCAAAAAAGGGACTCATTTTATTGAGCATAGACGCGTCGCTAAGGTCCAGTCGATCAATGGCATAGAAGTTACCCACCATACCGGCCACGCCCCCAACGGAACGAATAAGCAGGTACTTGATGTTTCCCGGTTTGGGGCGAAAGCTGTCTTTCTTGCGCACCATCATCACAAAGGCGAAGATCATCGCCACAAAATTGCGAAAAAAGACCTTTTGCATGGTGGGCAGATCGCCGGACAGGCGCACAAAGGTATTCATACCCGTAAAGCACAGCCCGGACAACAAGATGCAAAAAATGCCCATGGTCTTGTTGCTGGTTTTAGCCAAAGCACCCACCTCCTACTTGATTGTATCCAGGTAAGCCTTGGCCCGCTGCAGCTCCGCCGCCACCCGGTAGCCGCGGGAGTAGATCTCAATCATATAATGCACCCGATCACCCAAAGTGCGGTACAGCCGCTGAAAGTCAAAGCTTCCCTGCCCCGGGGGCTGGCAGTCCTTCTCCGGGGAATGATCGCTGATGTGCACATGGACGATCTCCTTTTGGAAGGTATCCAGAAACGCAAAGGGATCCTCCCCGGTACGCACCGCCTGCTTAATGTCCAGCACCATATGGAAGTCGTCTCCCAGCGCGCGGCGCATTCGGTCGCAGAAGGCAATGTGCTGGCTCTTAAAGCGGTTCACATTCTCCTGGCACACGGTCACGCCCTCGGCGCGGCCGATCTCCACCAGCTGCAAAAAGCGCGCAAAATACCGTTCCTCCGGAATGGGAATCTTGGGCTGGGCAACCGCCCCGTGGATCACCACAAATTGGGCGCCCAGTAGCGCTGCCGCATGGCAGGTTTCTTTATAAATATCAATGGTATCTTCAAATCGGCGCTGGTAATCGCCAAAAATGCAGCTGCTTTCCATAAAGCTGGAAAAGGGGTGCACGGACACCACCTGGGTGCCGCCGTCCCTCGCAATAGCCGCCAATTGGCGCACAAAGGCCGGGCGCAGCTCCTGCCGGGCGTTAAAAAACACCTCGGCGTAGGGAAATCCCAGTTCCGTCACCTGCTGCAAAGCCCGCTCCGTCTCCAGAGGATAAAAGCAAGCGGTAGAAGCTCCGGCTTGCATCAGCCCACCAGCTTTTCAATGGCAGCCAGGCGGGTGCAAATGCACAGCAGCTCCGCTGCCAGGGCCATCTCCTCATTGGGCGGGAAAGAGGGCGCAATGCGAATGTTGCTGTCCTGCGGGTCAATGCCATAGGGATAAGTGGCGCCCACGCTGGTGAGGGTCACGCCGCCGGCCTTACACAGCTCGCCCACGCGCTTGGCGGTGCCGGGCAGCACATCCAGACTGATAAAGTAACCGCCCTTGGGGGAGAACCAGTCAGCGATCCCCAGGCCGTTCAGCTCCTTGTTCAGGCGATCCAGTACAATATCAAACTTCGGCTTCAAAATTGCCGCATGTTTCTTCATGTGGGCACGCACGCCGTCCGCATTCTTAAAGAATTCCACATGGCGGTGCTGGTTCATCTTGTCATAGCTGATGGTCTGCACCGTCAGGCGCTGACGGATCAGATCCAAGTTTTTCTTGCTGGCCACCAGGCAGGACACGCCTGCGCCGGGGAAAGTGATCTTAGAGGTAGAGGCCACCTCTATGACCAAATCCTCATTGCCGTATTCCGGCAGCACATCAAAAATATTCAGCAGCTTATCGCCGTCCTCGTCCAGATCATGCACGCAATAGGCGTTGTCCCACACAATGCGGAAGTCCTCCGCCGCCGGGCGAAGCGCCGCAATGCGGCGCACCACTGCATCGGAAAAAGTAATGCCGGTGGGGTTGGAGTACTTGGGCACACAGAACATACCCTTCACGCTGGGGTCCTTCACCAGTTCTTCAATGGTGTCCATATCCGGACCGTCGGCGTTCATCGGTACATTCACCATTTGCAGCCCAAAATACTGGCACACGGTAAAGTGGCGATCATAGCCGGGCACCGGGCACAGGATCTTCACTTCCTTTTCCTGGCTCCAGGGTTTACCGCCGATGCCATGGGTGTAGCACTGGCAGATAAAATCAAACATCAAGGTCAGACTCTCGTTGGGGCCGATGATCACATTCTCGGCCGGCACCTCCAGCAGCTCGGCAAACAGCTGCTTGCAGCTGACAATACCGTCCAAAATGCCGTAGTTGCGCACATCCACGCCGCCGGACACATAGTCCTTCACATCATTCATACCCACGGACAGATCCAACTGCTCTTTGCAGGGCTTACCTCTGCTCATATCCAGTTGCAGTCCCTTGGCCTGAAATTCCTTGTACCGAGCCAGCAGACTCTCCTGCTCCCGGAGCAATTCGTCTTTTGTCATCTCCTGATATGTTCTTGCCATACGAAAATACCTCGCAATCTAAAATTTCCGTTCATTATTTTACCACAAACGACTGCGCCTTGCAATTCTAAAGCCAACAAAAAAAGAGCGCCGCAGCACTCTTTTCTTATACGCATTGCCTATTTTTCGTTTGGATTTGCCGGTGCGTCCGCACTCTTTTTCTTTTTGGTGAATACCAAGAGCTTGGAGAACACATAGTTGAGGATCACCACCAGCACGGAGCAAACAATCTTGGCTACAAAGCCCTTGACCCCAAACAGGTCCTGATCCAGCCCGATCTTAAACAGCAGCAATGGGCCGAACCACTCGATCACGCCGGTCGCCAGTCGAGAGGCCACAAAGGACACAAACTCCCGCGCCGCCACCTTGGGTACCCAGCTTTTGCTCTCAAACACCCACAGCTTGTTGGTGATAAAGGCAAAGATCACCGCAGCAATCCAGGCAATCACATTGCTTACCGTCATCTTCACATCGTCGCTGCCGGGGGCATGCACCAGCACCGCCTTCATCAGCAGACTGTACACCACCCAGTTCACACCTGTGGTGGCCACGCCGAAGATGAGATACATAATGATTTCTTTGTACTTGATCAATAATTCTTTAATCTTCTTCATAGGCACATTATACGCTATCCGATTCTATTTTGCAAGTTCAAAAAACCATTTTGTCTCCTCTAAAAACAAATAAGTGAGCACACCGTCAATGCTGCAGGTGTAGCGCAGCCCGGCGCCCCCGGAACGCAGAGACGCCGCCGGGCGAATATCCAGCACACGGTCCACATCCAGCCATCGCTCCTCCCACTCCATCTTTACCGGGCGAATATCGCCCTCCTCATTATACAGCGCCAGCACGCGCACATAATTTTTCATCCTGCCTGTTCCTTTCCGGTTAAAAATCCAACGGGGTGTATGGTATGGTCATCGTGGGGATTAAAACGGGACAGCCCGGTATCCCCCAGCAAACTGGCCCGCTGAATACAGTAGTTGCCAAAACGGCGCTTCAAATCATCCACCGTGCGCTCCAGCTTGGCTGCCCGCTCCCGCTGCTCCTGGGTATGGGCCAAATCAAACTGCACACAGGGTTCCAGCTCAAAGTCCGTCACCGACAATCCAATGCTGCGCAAGGGTGCGCCCCAGCGATAATTGGCACAAAACAGCGCCATGGCCGCCTGCAAAATCTCCGTGCTCACATCGGTGGGGGCGGCCAACTTGTGTCGCCGGGTAAAGGTTTGCAAATTCTTATCCCGCAAGGAGATGCACACCGTGCGCCCTTGCAGTCCCTGCTCCCGCATACGGCGGGCCACACTCTCTGCCAGCACGGTAAAGACCACCTTTACATCCGTATCATCCACCAGATCCCGGGGCGTGGTGGTGGAATTGCCCACACTCTTGACCGCCGCCTTGGCGTCCATATGCTGCACCGGCGAAGTGTCCTCCCCCCGGGCAAAGGCACGGAGCATCAGCCCGTTCTTGCCCAGCAGACCTTGCAAAAAATCCGACCGAGCCGCTGCCAACTCGCCGATGGTATAAACGCCGTAAGCGTTCAGCTTGCGGGTGGTGGCCGGGCCGACGCACAAAAGATCACTGCACGGCAGGGGCCACACCACCCGGTGGTAGTTTTCCCGGCTGATAACCGTCACCGCGTCCGGTTTTTTATAATCTGAACCCAATTTGGCAAAGATCTTGTTAAAGCTGACCCCCACGCTGACGGTAATGCCCAGTTCCGCCTTTACCCGACGGCGAATTTCCTGGGCGATCTGTTCCCCGGTACGATCATCGCCGGTCACATCCAGCCAGTTCTCGTCCAGCCCGAAAGGCTCAATATAGTCGCTGTAATCCTCATAGATCCGCCGTGCCATCTTGGAAAAGCGCATATACAGCGGGAAGTTCGGCGGCACCACCACCAACTGCGGGCACTTTTGCCGCGCTTGCCACAGCGGCTCCCCCGCCACCAAGCCGTAGCGGGAGGCAATCTCGTTTTTCGTCAGGATAATTCCGTGGCGGCTCTCTGTGCTGCCGCCCACCGCCACCGGCTTATCTCGCAGCTCCGGGCGGTGCAGGCACTCCACCGAGGCATAAAACTTGTTGCAATCCACATGCAAAACGGTGCGCTCCATTCCCTACGGCTCCTTTTCTGTTATCGAACATTTGTTCTACAACATAGCATACACCGATTTTGACTGTTTGTCAAGAGCCGGGGCGGCAAAAAATGCAGGTAGATTTTGCCTTGACGGTAGGTGCTTTTTCTTATATACTAATGGGTAGAATTGAGGTGCAACTATGCCGTTTTACGATATTGCCGGGCTGGTGGTGGAGATCAAGCACCCCACCGGCAGAACAGAAAAGCAAGCCCGTCCCTACCTGTGCAAGGACCAAGAGGGGCAGACGGCGGACATGACCATTGATGTGACGGAGCAGCGGGTAACAGACGCTATGGCCGAGCACCCGGAGATGAACCGGGACGACTGGTACTATATGCTCACCGGATCGGATTTTTACACCCAGCTGCTGAAGTTCCGGGGTATTTTGCTCCACTCCAGCTGCGTGGTGGTGGACGGCGTGGCCTACGCTTTTTCCGCAGACAGCGGCACCGGCAAATCCACCCACACCGCCCTGTGGCTCAAGCACTTTGGCAACCGGGCGTATATGCTCAATGACGACAAACCGGCCATTCGCCTGGTGGGCGACCGGGTGTATGCCTGCGGCACCCCCTGGAGCGGAAAATATGATTACTCCACCCCGGGCATGGTTCCCCTGGCGGGCATTTGCTTCCTCGAGCGGGCGGAGGAGAATTTTATCCACCCGGCAGACACCAAAAAGGCAGTATTCAACATTTTCTCCCAAACGGTGCGCAAGCTGGGGCCTAACGCTATGGAGCGACTGTTTGATATGCTGGAGACCATCTTTGCCAAGGTGCCCCTGTACGAACTGGGCTGCAACATCAGCGATGACGCGGTGCGCACCTCTTACAACGCCATGAAGCCGAAAGGTCAAAGCGAAAAGTAAATACAAGCGAAAAAAGAAAGGCAGTTACCCAAAAACGGGTAACTGTCTTTTGTTATCTATGGCGTTATTCCGCTGTGTCCTGCGGCAGGGCGTTCTTCGGCTGCGGCAAATACACCCGAGCCTTAAACAAATCGCCGTCAATGAGCAGCTCTAACTTCCCTTGCTGGGCGCTGCACAACTCCTGGGCAATGCTTAGGCCCAGACCGTTGCCCTCCTTGGTGCGGGAAGCGTCGCCCCGCACAAACCGTTGGGTCAGCTCCTGGGGTGAAATATTCAGCGGTTCGGCAGAAATATTTTTAATTTCAAATACGCCGAAATCCCCTTGCTTATACACTCGCACATACACACGAGAGTCCACGGCAGAATACTTCTTGGCATTTTGCAGCAGATTTTCCAACACCCGGTAGGTTTTTGACCCGTCGGCAAACGCCTGTACCCGAGGCAAATCCGGATCCAGCACCAGTTGCAGCCGGTTCTCCTCAAATTCCTTTTGGTACTCCCCGATAGCCTGGGCGGTCAGTTCGCCCAGATCCAGCACCATAGGGTGCAGGGTGATGTTGCCGGAGGACAGCTTGGACGCCTCAATCAGATCCTCCACCAGCCGTGCCAGCTTGGTGCTCTTTTCCGTCAGCACAGCCATATATTCCTTGGCCTTTTCGTCCGGCTGGGGGCACTTAGACAACAAATCCGTATAAGTAATAATGGAGGTAATCGGGGTCTTTAAGTCGTGGGACACATTGGTGATCAGCTCCGTTTTCAGCCGTTCGTCCCGCACCGCCTGGTCCACGGCGTTGTGCAGCTCCTGATTGGTATAACGCAGGCTGCCGGCCATGGCGGCCAGTGCCGGGTGGAGATGTGCCGCCTCCACATCCGTGCGGTTGGCTGCGGCCTCAATCACCCGATCCAACTGGAACAAGAAGCGCAGCGCATAGCCCACGCAAAAACCGTTAAAGCCCAGGCCTACCAAGCCGCTGATCACACCGACCACCGGCGCCTCTCCATTCAGAAACGATGCAAACAGCACCACCAATACGATATTGATCAGCAGATAGCCTACGGCGCAAAAGACCATATTGCGCTTAAAGTGCCGCGGGGTATAGGCCAGCCCCCGGATCACACGCCGGTTGAACCGGTGCAGTTTGCACAACAGACGCCAAATTCCCAAGCAAATATAATACAGCAGCGTGCCCTTATACAAGTGTTTCTCAGACTTGCAAAGGCGCACAAAAGACAGGGTCAACTCTGCATACAGTCCCCAGGCCACCGCGCCCAAAGCGCCGCAGGCCGCTAAGAACATTCCGCCGTAATACAGGGTGCTGAGCTGATAGCCATAATAATTGGACAGGTCATTAAACAAATTACCGAACAGCACCACACCCAGCCCAGCAATTGCTGCAGCGATGATCGCCGTGTGCAGTTCCAAGGGAATATAATCCATCCACAGCAGGCGCACGCCGTCCGTACCGGCACGGCGCCCGCAGCCCAGGCACGCCAACACCAAAAAGGCAAGGGCCAGCACCGCCAGGCAAACAGCCGCCACGGTCATCGCCACGGTATTCATATTTTGCATACGGGTGCACAAGGCATTCAATTCCACAAAGTCCGGAAGCGTATCGTTGCCGCCGGCCACAGTGGGGTCTATGCCCACATAAATGCTCATATCCCCGTCCATTAGGTACTGTGCAGCGTCCGATCTGGCATTGCCGGCACCGTAATCCGTGCCCCGCAGGTTCTCCCCCGCCTTGGTCTTGGAATAGTACACCGGCGCGTCTTTCAGCATAGCCGGCGTTTGACCCTCGGGCAACTGGCTGACCACCTGACCGGTGATATTGTCCTTGGCATAGAATTGCAAGCATTGCAGTTCTTGCAAATTTTGGCGCATCTTCTGCTGCTCGTCGGCAGCGAATTGAAATCGTTTCACCACCGCTTTGTCATAGAGCTTTTTGATGTGGGTTTCAGCCGATTTGATCGTCTCACCCAAGGTCAGGTCATCATCGTACATATCCGCCGATACCGTTTGGCCATCCACCGTAAAATCGAACGTGTAATAGCGGATTAGGTCGTCCGGCTCTTCCGACATATCGCCATAATACTCCACGCCGCCCGAACTGTGCAGCCAATTTGCCAGCTGCAAATAGGGCAGATAATCCTCCCCTGCCCGGGTGCCGTTGACAATCTGTTGCAAATCCCGAATCAGCCCCGGTGCGTCCCGATCCTCTGCCACCACTTTCTTTATGGTCTTTGTGGGCACTTTATAGTTGGGTATATCCTTGCCGATACTTGAAATATCTTCATTTTTCAGCCCGGCATAGAACACCAGCGTTTTGCGAATGGCCGTGGCCTGGTTCTTCTTATATTGCTCCAGTGCGGCCGCCACGCTGTCCGCCTTGGCTTTCTTCAGGGCAGCCGCCTTTTGTTGCAGCTGCTTTTGCCCCGCCAGCAGCGTGATCTCATTGACGATCGCATCCAGCTCCGCTTTAAAAATCGTAGTCTGTACCAGACTTCCTTTTTTTGCTACGGACGGATCTGTAAATGCATCATTGTTATACAGACCGCTGACCCGCATCACGGCGCTCAGCAGTGCCACCGAGCTAAAGGCCAGCACCATAGAGAGCACCACGCACAGCGCCTTAAACCATCTGCTTTCTCTAACACTTTTCCACTTTGTATCCAAGTCCATACACCACCTTTAAGTATTTGGGCTCCTTGGGGTTGATCTCAATCTTTTCACGAATGTTGCGAATGTGCACCGTCACGGTCTTTTCCGTGCCGTAGGCCGGTTCGTTCCACACCGCTTCATAGATCTGGGCGCTGGAGAGCACACGACCTATATTGTGCATCAGATATTCCAATATCTTATACTCCCGGGCAGTCAGCCGTACCGGGTCGCCGTCTACCGTCACTTCCTTGGTATCCGTATCCAGCACCAGGCCGCCGGTGACCAGCTGGCTCTCCCGCACCTCCAGGCTGCCAAGACGCACATAGCGGCGGATTTGGCTCTTGACCCGAGCGGTCAACTCCAGCGGGTTGAAGGGCTTGGTCACATAATCATCGGCGCCAAAGCCCAAACCGGCGATCTTGTCCGTGTCCTCGCTTTTGGCCGACAGCAGAATAATGGGAAAGTTGTACTTCTCCCGCAGCTTTAATGTGGTTTTCAGTCCGTCCAGCCGAGGCATCATAATGTCCAGCACCATACAGTGGATTTCCTCCCCTTGTACTTGCTCCAGCGCCTCCAGACCGTCCCGGGCACACAGCACCCGATAGCCCTCCTGGCTAAGATAAATGCGCAGAGACTCTAAGATCGCCGCATCATCATCGCACACCAATACCGTAAACATTGCTCTCATCTCCCTCAAGTGATACAAAGTGCTTGCTCCATTGTACCACAAAAATCCCCAACGGAAAACCCGTTGTACACATTTAACCACACATTCTTAAAAGCAACGCAAAGGAAATCTAAAGAACCGGTAAAGTTTGGTCGGCAAAACAAAAAGCTGCCGCAGCATAAGCACTGCGACAGTCTTTGTATCTTTATTGCTTAGAAACAGCCTGAGCGGTGTGGCCGTCAGGGTCGCCGGTATGGGGCTGTTCTTTCTTAGGCCGGTTGTTGGGCACAGGGTTGTTGTTTTGCCCTGCCGTAGGGCCCTTGCGTTTTTCCACATCGCCGCCCTCTTTCAGGTGCTTGATGTAGGTGGTGTAGTCATCGTTCCACCCGGCGTAGGCCGTATTTTGCCGCTTATCCTCCAGCTGCACATGGTCCTTAATGTACTGCCCCACATAGAGCGATACTTTTTTGGCGCCGTAGCAGTTCAGGTGGTTGCCGGCGTCCCGGCTGTCCGTTTTCCAGCTAAAGCCGATCTCCTTGCGTTTCAGATCCATATCCAGGAACGGAATGCCGTTTTTCTTGGCATAATCATTCACCGCATTGTGGCGGGCGTAGGTCCAGGTGGTTTGGGACGGCACCTGCACCAAAATCAGCTGGGCGCCGTTCTTTTTGCACAGCGCATTCAGCTCGTCCAGCTTGCGCACAAACAGCGGATTGATCTCGTCCCGCTTTTTGGTCTTTTTGATATATTCCTTGCCCCGATACGGCACCTTGGCACCGGACACAAACTGCCCCTTGGAGGCAAAGCGGGCAGAGTAGGACTTGCGCTTAACCGCCGTCTTGGGGTCAAACTGCTTCCACCGATCGTGGTACTCCAGTACGCTGAACTGGTTGAGTATCTGCTTACGCACATCCCGGGCAATCACCTGAACAGAGTTGGAGTTGGTATACAGCTGATCCGTTTCCAGGATCACCACCTTGGGCTTTTGGGTTTTTAGGCACTCCTCCACCGCGCGAACAGACTCGCCGATCAGCTGCTTACCGGTACCGCTGATATAAGAAGTAAAGCCGTAGTTTTTCCACATTTCCATAGGCGAAAAGCCGCTGTAAGCATCACTGTTGCCTACAATAAACACATCCAGCGTGTCCTTCTCCAGCGACAGATAGCCGCTGGCGTTGGGGTTCACGAACCCGGCTGCGTCATCATTGTTCTTCGGCTCCAATAGAAAGGAAACACCGTAGAGCAAAAGCAGCAAAATCAAAATAAAGGACACCAGGCGGGTGCAATTTTTCAATATCAACTTGGTCTTTGCAGTCATCATGCACCCCTCCTTAGAATTGACCGTAAATAGGCGCTACCGTTTCATAGCCGGTACCATAAGCGCCAAAGACAATCACACCGATAATCAGCGCCAAGAACACCGCATACCGCAGCACCACCGGGCGGCGAGCCAGCTCCGAGCGAATGGTGTGGCCCTTCTCTTGCAGCACCTCTACAATGCCTACCACCAGCACGCCAATGCCCATAATCAGGAAATCCTGCCAGTCGTTGCCTAAAGAAAGCACCGTACCGTTGGTTAAGCAAGCGCCGTCAAAGTCCGTAAAGATACGCGCCAGGCTCTGGCCCCACTGGGAAATCGTGTGGCAGCGGAACAGCATCATGCCCACATTGACGATCAGGAAAGTACGCACCATCTGGAACAGGGCAAAACCCTTACTCTCCGGCGCAATATGCAGTGCGTGCAGCAGCTTGTCCGACACCGGGCGCAGGTACATACCGATCATCATTAAGATGTAATAATACAGCCCGTAAAGTACATACTTCCAACTGGCGCCGTGCCAAATGCCGTTAAAGAACCACACACAAAACAGCGCAAAGGTCATGGGCACCAGGTTGGCAAAATAATCGTTTAATTTCTTTCTGGTATGCTTACTTAAATTCATCAGTCCCTTGGATAGGGACACGGAGAAGAACACATACTCCTTGATCCACGCGCCCAGGGTAATGTGCCACCGCTGCCAAAATTCGTTGATGGTTTTGGAGAAAATAGGGCGACGGAAGTTCTCTTGCATCTCCACCCCAAACAGCTGACCGGTGGCACACACAATATCCATACAGCCGGAGAATTCGCAGTAGATCTGCACAGTATAAAGCAGGGTGCCCAGCAGCACCATAGACCCGGCCTGGTCGCCGTTGTCAAACACACCGGTAACAAACAGGTTGGCTCGGTCGGCAATGACCATCTTCTTAAACATACCCCAAAAGATGCGCATCACCGCTTGGGCGTCTCGCTCAAAGTCAAAGCTGTGGCCCTCCACCAACCGGGGCATCATGATCTCATACTTGCCGATAGGGCCCTCCGTCATTTGGGGGAAAAAGCTGAGAAACAGCGCCAGTTTGAAGAAGTTCCGCTCCGGCTTGTACTTACCTCTGTACACATCCACCACATAGCTGACCGCACACAGGGTATAGTAAGAAATACCCAGGGGCAACAGAATTTGCACCGGCTGATAGGCGCTCTTGCTGCCAAACAGCCCGGCAATGCCGTAGGCGCTCTCTCCCAGGAAATTTACATATTTTAAGGCTATTAACAACCCAAAGACGCCCAGTACCGCCACGGTGACCACCGCGCGCTTCTTGGCGTCATATTTTTTGCGAATTTGTTTCTTTTCCTCTTTGTCGGCAGCTGCCTTGCGCCGGGCTTTGCCCTGATCATTCAGGTGGCCCAGCAGCAGCCCGCCGCCGTATACGATCAGGATGGCCGCCACCAGCCACAGTGTGCGCAGCCCCGCTGCCATCACATAGTAGACGGCGCTGGCACCCAGCAACACGCACCATTTGGCCCGCTTGGGCACAATGGTATAAATCAGCAGGCTGATCCCTACAAAGAGGAAGTAAGTAACAGATGTAAATGACATAACTTGCTTCCCTTATGTATAATTTTTATTCGTCCTGCAATTTTTCAATCATCTGCCACATCGCCTGGGCGGATTGAAAGTTCTCCGGCACAATCATCAGCGGGGTAATCTCCACATCAAATTCGTCGCTGAGTTTTGCCACCAGCGCCATGATCGCCAGAGAGTCAAACACCTTGTCATCAATCAAGTGCTTCTCAGACTTAAAGTCTACGCCGGGTTTCATTTCTTCCAAGATTTCAAGCAATTCTTCCATTTTTAGTTCTCCTTTTTCATTATATATAAATTTTTGAATGGACTTTAGTCAGCCTTGTTAAAGTATGCGGCAGCCAGCGCCTTCCGGTCGGTTTTGCCGTTTTGATTGTAAGGGATGGTCTTGGCCTGAATGACCTTGGCCGGCAGCATATAGGCGGGCAGCGCTGCCTGCAATGCCTGCCGCACGGTCTCCTGCTCCGCCTTAGCGCCTACATAGATCAAAATCAGCTGATCCGCCGCCTGGTCGTACAAACACACGGACACATCCACCCCCGGCTGGGCCGTGGCAGCCGCCTCAATCTCGCCCAGTTCGATCCGGTAGCCCATGTGCTTAATTTGGAAATCCCGACGAGAAAGATAGATCAACTCGCCCCGTTCATTCCACCGCACCAGATCGCCGGTTTTATACACCCGCTCCGGATAGTGACTTTGCAGCGGATTTTGCACAAAGGCAGCCGCCGTTTTGTCCGGGTCGTTATAGTAGCCCATAGCCAGGAACGAACCTCTGGCGTACAGTTCGCCCTCCTCGCCGATTCCGGCCAGCCGCCCGTCCTCGGTAACCACAAAGCTGTCGCAATTGTCACAGGCAATGCCGATGGGCACGCTCTCCGTGTCTTTGATCTCCCGATCCACAATGTAGTAGGTGCAAATATCCGTGGTTTCCGTCGGGCCAAACAGGTTGGCAAACAGGGCGTTCGGATACTTGCTGCGCCAGTAATTCAGCTGCTTGGCAGGCATGACCTCACCGGCAAACAGCACCTTTTCAATATGCTCCGCCATCATAAAGTCCAGCACCTTTAAATTGGCCACAATGGACAGGGCGGAGGGCACCCAATAAATGGTGTTTACCTGCCGCTCATTCAGGTAGCGGATCAGCAGAGCCGGGAAGGAGAAATACGACTTGGGGATCACATGTAACTGCGCTCCGGTGCGAATCGTAGCGTAAATATCCGTCACCGACATACTGAAATAAAAGGGCGTTTGGTTGCCGAAAATCGTCTTTTCGCTGATGCCAAAGGTATCGGCCGCCCAAGCGGAATACGCCAGCACGCTGCGATGGTTCACCACCACGCCCTTGGGGTTGCCGGTGGAGCCGGAGGTGAAAATGGCATAGGCCGGATCCGTATCGATCATACGGCGGCGCACCGTTTGCAAAAGTTCCGGCTGTGCCTGACCGGCCGCCAGCGCTTCTGCGCTATACACCTTGCCGTCATAATCCAGTCCGGCCGGGTCATCCTTGTGGGCCTCGTCACAGATCAGTGCCGTAGGCTGCAAGGTGTGCAAAATCTTATTCACCCGCTCGGCGGGCATTTCCGGATCCAGCACCACATAGAAGTTGCCGCTGTACAGCACCCCCATCAGGGTCACCAAACAGGGTGCGCCCCGCTCCATCAGCACCGCCACCGGGCAATTTCGGTCTCCATTAGCGGCCAGCGCACTGCCCACGGATCCGGCGATGTTCACCACCGTTTGGTAGTCATAGCTGCACTGCTGATCTGCAAAGGCGGTCTGCCTTGGCAAACGCGCCGCAGTGCGTTCCAGTAATTCAAGTACATTTTTCATTTTGTTCACCTACTTAACAAATCGTCTTGCCATTATTCAATCATAAAAACCTAAAAAGAAACGCAACAAAATCTAAAGATATGCGAAAGATTCGCCGTTCTTACCGTATTATGGTGCGTAGTACAGTTCATTGATACAATCATACACGGATAGACCCGGAAAGTCAATCTATTTTTATAAAATGACAATATTGTCACAAAAGGTCAAAGTTCGTCACAAAAAGTATCACAATTCGTGATAATTACAAATGTCGTTCAGCGGATTTTGTACAATAGCTATACTGAGTACCAAGGAGGTAATTTGCCGTGCGGCTAAAGGATTTACGAGAGGACCGGGACGAAACGCAGCGGCAAATGGCAGCCTTGCTGAATGTGGGTCAAAGCACCTATTCCATGTATGAAAACGGCCAGCGGGAGATCCCCCTGGCAGCCCTTTGCAAACTGGCAGACCATTATGATGTGACCCTGGATTACCTGGTGGGCCGCAGCGACGCACCGGGTAAGTAATCGTCTTTACAAATGCCACATTTTCTTGTATAATATACAGTAGAACACAAAAGCGTGTTCTCCGCAAATGCGGAGGCACGCCTTTTTTGCTTTCAGGGTCAGGAGGGATACAAATGGAAATCAGCAGGGATGGGCACCGAGCCCGTATGCGTGCCGCTTATCTGCAAGGCGGCGGCGACGCTATGCCGGACCACCAGTTGCTGGAATTGCTGCTGTCCATCAGCATTCCCCGCAAAGATGTAAAGCCCATTGCCTATGCGCTCATTAACCGCTTCGGCTCGCTGGAGCAGGTGTTTGCCGCCGGCGCAGCAGATCTGCAACAAGTGCCGGGCGTCGGCGAACAGACCGCCGTACAGATTCTGCTGGTACGGGACCTGAACCGGCGGATCCGTCAGAATCAAAACAAACCGGTCAAGCACCTGACGGATGCCACCCAGTCCTGCGCCTACTTTGCCAATCTGTTACGGGACAAAACCGCCGAGCAGGTGTACTTGGTCACTCTGGACGGCAGTGCCAAAATCTTGCAAACCCACGCCGTAGGCAGCGGCAGCGTCAACCTGGCCGCTGTGGATCAGCGCACTTTGATGGAACATATTCTGCGAGACAACGCCAGCGCTGTTATGCTGGCACACAACCATCCCGGCGGCAAGGCCCAGCCCTCTGCGCAGGATCTGGAATTCACCATTCGTCTGCTTTCCATTCTGCGTTCCATTCATGTGCAGCTGCTGGATCATATTATCGTCAGTCCTACCGACACCTACTCCATGCGCAGCGACCCGGAGTACGGCAGCTTCTTCACCGTCAAATAACGCAATGTACAAAAGGAACCGCAGTTTGGCACCGCGGTTCCTTTTTTCATCATGACTTCTATTTGCACTTTTTCAACCGCCGTCGGCTCAAGTCACCCAGCAGTAAAAACAGCACATTGCCCAAGGCCGGCACCAGTGCCAGCAGTTCTCTGCTGCCCGTACCACCGTCTACGAGCGCCACAAAAGGCAGCGCGCACCCGGCGATCCCTAAGAGCCATTCCGGCACTGCTCCGTAAAGAACCACCAACCACAACACTTGCACTGCGGCAGCCAGGATCATCACAAACCCTGCCACCTTGGTGCTCTGCCTGCTGCCGATCCATCGACCGTAGCCAAAATACAGCACCGCCGTTATGGCACCGGCGCAGCCAAATAACGCCCGATCATTGGGAAACGGCAAAAGCATCAGTACCGCCGTCGCTCCAATTGACGCCACCGTTACCGCCAAAAGGCCCAAAACAGCCCACCCGACCGACGATTTTTTCATAAACATACCTCCGCGCCGCATCATGTGTTTTCATTATACACAACACCGTACCGGTTGGCAAGCCCCAGCCGATCGTGGATACCGGCAAGTGCAAAACGGACATACAAATGCGTGCCGGTTTATCCGACAAGTGCCCCTTTTTACTCTTCATAAAGCGCTATCGCGTCTGCCAAATCCTGCTTGCACAGCGCTGCCAATGCCTTGGGCTCTGTAATTTTGATTTGCCCTGCGTACAGTCGTGCCCAAAGGCGCATATCGTTCTCATTCACCTTCACTGCAGCTAGCACCCGGTCTTTGTCTAAATCTTCAAAGTCCACATTGGCCTTAAAAAAGTCCAACACATCACTAATCAAATAACGAGGCATTTCAAACCGCGCACGGATCGACTTGCCATCAAACATATAAATATGCTCCGCCATATACTGCGCCACATCCAGACCAACCAGGCCTTGCACCTGTTCTCGCGGCTTTCTGGGTGTATCCAGCAGTTCAATATTGCTGATCCGATCCAAACGATAATGGGATAGGTTATCGTATTTGTCATAGTTACAGATCAGATAATATTTGCCGCTGTTTGCAACCATAGTGTATGGATTGATCACATATTCTCGCGCCTGACCATCTTCGTTCAGTCGGTGGTGCAGCTTTTTGTCCGTACCATATTCGTTATACAGGAATTTTACCTGCAATCCTTTGGAAATCGCTTCGTCCAGCACCTCTATGGTGTAGAATAATTCTTTATTGATTTCCCTATCTACGGATTCATAAGACTGAATATTCCCGGTGCTGAACTTAAAATACTTGTTGGACAAGCCCTTCAATTTGCCCAGCACCTCTTTCTTGTAGGTGGCCGGAATACTCCGAGAAAACAAAACGGAATCCATTAGCAACCGCAATTCCGAATCCGTAAATACATTGTTATAATAAAACCCGGTCAAAATTTCGTTTTTCTCCAGTTCCCCCGTTTTCGCATTCGGGGTAAAGCGCACCTTTGTCGCGTACTCTATATTGTACGAACCGTCGTTGATCAAGTCCTCCAAATTGGCTTTTATTGCCTTTCGGTCCACAACCATATCGTATTCGCTTTCCAGTCGCTGCTGTATTTCCTTTTGCGTTACCGGATGATCTGCATCCGTATTCCGTTTCAGTATATCCAGAATATACAAATTCATCATTTTCTTTGGTCTTGCGCCCAACATACCGTCCACCTCACACTCATTTTATCCCGTATGCCTACATGATGCAATAGAATATGTGACTTTTTTCGTACATGATGGATTGTAAAGTCACCTCTGTCTTACTCGGTACGCCCATTTACTCGTTATCTCGGTAATAAATGTTCTCAGGCATTTTGATAGAAAGCCGTCGTGAAGCATATATGGAACGATCCCACCAAGCAATCTCGGCACGACTGTAATCATACGAATAACCGACAAAATAAATTGCCCGGTTCGGTACCGCTTTTGCTAAAATTTTATGCTGAACATAACGCATTGAATTAAACACATTGGAACCATATGGTGCGTCCCTATACGGCTGCAACGCAGCAAGAATACAAATATGATTTTTAAAAGCGAAGTCGTTCAAAGATTTTAAAATTTGCATCTGCTCCTGATCACTGCAATTGGCAAGCGCGCATTCGAGTTTTGGCAAATAAAGCAAGGTAATTTGAAGCGCTTCTATTTTTGGCGCTAATTGGTCAATACAAGTCATCAGACCTTCGTTTTCAACATATTCACAAACATACAGCGGTTTATTCTTAAACCAGAAGGCCACATTGCCTTCGCCCCACTTCTCCTTTATCGTAGAACAATATTGCCCAATGTCAAACTTTGAAACAGGAGACAAACTCAAAACATGCTCACCGATATACAACGATTGGAGCATGATAGATGTTGTCGCCCATTCTACCTTTAGGTCCATCTCCTCGTTATAAAAGATCTTCAAACCGCCTTTCTCTAAGATGTCCGTTTCATCCAGTTGCTCTATTTCCAAGTACTTTTCTCCTCCAAGGAACCTATGGCTTGTTCGTGTTTTAACATACTCATCATATTGCACAACCCGCAAATTGTCTGGCTGTTCCGTTTTCGGTTCATCGGCACTTTTCGCCTGTTCCTTTTGAGGTAATTCTCTGACCTCAAAATCATTGCAGTTTTCAATAAAATCCTTTGCCAGCTTTACAACCGGTTCATCGCCCTTTTCCTGTACCATACATACGCCTCCCTGGTTTTTTCGATTATCCTTTAATGTGCAGTGCAAGCAATTCGGATTTTCTCCGCTTTCTCTCGCTTGCAGAAAAATTGTATAATACACGGTGCGCAAAAATCAGGACATGGACTTATTTCCTATCACAGCATCTGCTATAATAAAAGCAACAAAAGAAAGGAGCCCAAAATGGACGTTCAAATTTATTCCAGAAAAGAAATTGAAAAGCGTATTCAAGCGGAGTTTCCGCCCCATACGGCCGTGATCAGTTTTTACGATCCGCCCGGGATCCGCAGCGACAACCAAGGACCGGTGGATTACAAAGGCAAGCCCGATATGCTGCTGCAGGTAGCCGTATTTGATATTGATAAAGAAATCCTGCCGGATTACAGCTTGACCTATGACACCTACTTGCCGGAGGCGGACGCCATTGCCGCTTTTGTTAAAGAGGCAGTAAACAAGGGTGACGCCATCATCTGCCAGTGCAATTACGGCCAAAGCCGCTCTGCCGCTTGCGCCGCCGCCATCTTAGAACACTATGAAAAACGCGGTATAGACATTTTTCGAGATTACCGCTACTATCCCAACCAGTTGGTATTCAACAAAATCTATGATGCGCTGAAAAAATAGAATCACCCCTACATCTACGAATAGGTGTAGGGGTGATTGATTATTTAAACGCGTGTCCGTAAACCCAAAGCGCACGATCCATGTTTCTATATTCTTCAATACTGCTATTGTAATCGCTCCCAAATACAAGCGAAATATCCTGCATATATGGTTCGATATAGTCTTCATATACGGATTTGAATTTTTTGCTCGTTTTGTTAGGCAAAGTTTGTGGTTCAATTCTTGTTGTAAAGGGCTCTGCTCCGTTTTTGATTTCTTGAAGTGCAATGTACGCAAACCGGTCATATATTGGATATTGGCCTTTCGAAATAAAATATAAAAGCGTGATCAGATATACCGGGCCAATACCATTCTTGGCCTTTTTTCCCAACTCGTTTAAAACCTCTTGGGGGCTATCTTTCGATGTTAAATACAAACGATCGATATGTTTGACAATATACTCAACAAACTCTTTGATTTCTTCCCATTTTTTGCCATAGCGATAAATGTTAAAGTGATAAGGATCTTCCCAATCTTTGGAAAAAGTTATTTTTCCATTCTCATCGGTATCTTTATGCTTGATCTTTCCGATTTTCCAGGCAAGAATATTGATTACATCGTTCGTAGTTTTAATGCCCTCGTTCAATATTCTTTCAATTTCTGTTTCCGCCACTTTACTATTTTGCGTAACGCCTTTGACCACTCTTTCAGCCGAACGGAAATAACTTTTGTTGTACATTTCTATAAATTCGTCTTTGCTAATGGATAAATTCGTTCTGCAATCGTAGAAATTTTCCACATCACCACTCCTATCTTTTTGACAATATGATATTATCAAATTCATACTGTTTTGTCAACACTTGTCCCGCTTTGACACAATATCTTTCGTTTCACCTACGCTACAAATTCCGTAACAGTTACGCTTTCTCTAATCTTTTGAATATCAGAGCATAAGAGCGTTTCTTTTTGCACAAGAGCGTCTGTGATCTTCTCCAGGAATTCCCGATTTTGGATCAGCAGATTTCTGGTCTTACGCAAATACCGCTCCAGTTCTGCATGCACCACGGCCTCTCTGTTATCATAAGCTCTGTCGGATAATTCGTACCCAAAGCGCTCATATTCCAGAAACGATACACCGCTTGTGCCCGACTCTGTCAAATCGTCGCGAATGGATTGAATGGCGCTGTTCAGATCCGACTCACATCCACTTGCACAGGACTCCGGATAGTACATTTCTGTGGCGACTTTTCCGGCTAGGGAGCACACAATCACATAAGATCTTCCGTCCAATTCAGCGCACCGGTGTACAAAGCCGCCCATACTGTTTCGACCTTTTGCGCGCACAGATGCCAGGCCAACACTTCCGGGACAAACCAGCTCACTTACAACCAAATGTCCCGCTTCGTGCAGCGCAATCTTTTTTACTTCATCCTTATCTTTCAACAGACAATCGTCCGGCGCATTATATTGAATTCGCAAAACCGCGTCCACCAGTTCTTCCATTTCAATCGTGTTTTTCCTGTTATAAGCAGCACAAATTGCCGCTTCATTCAGTACGGTTTCCAGATCTGCGCAAGAGTGATAAGACATCATTTTGCACAGATCATCAAAATCAACATTCGGTGAAATGTTTTTGTTTTTCATATAATGCTTAATAATCTTTGCCGCATCTTCCTGTGTCGGTGCTTTAATGACAATCGTTCTGTCAAATCTACCGGAACGAATCAGTGAATCCGGCAGCTTTCTAAGTGCATTGGTTGTAGCGATCACAAAAACATCACAGCCCTTTACACTGTCAATACCCGCCTGAACGGCAACATATTCTTTTGCGTCGCAATGCCGCTCGTCGTCGTTGGCAAACTTGTCCATATCGTCTAAGAAGATGACAGACGGCGCATTGGCCTTGGCCTTTTCAAAAGTGGCCGTGATTTCATTTACGAACGCGTCACCGCCTTTGTTATTGGTCAAGGTATAGGCGGTCAGCCCACTGGCCTGCATAAAGCACTTAGCCAGCAGCGTTTTGCCCAATCCCGGTTCTCCGTGCAGCAACACACCACTGGGCATTCTGGCGCCCAGCGCTTCATATCGCTCTTTGTTGTGCACCATATCTACAATTTGCATCAACTCGTTTTTAATTGTGTCATAGCCGATTACCCGATCAAATTCGTTCATACCGTTTCCTCCATTGTATCAAATTGTGTTGTCCGGAATACGATCATCACCGCATTCCTTTCGCTTGCAACACAAGAATACCGGAAGTCGTGTCCTGTTTTTCGGGCACAAGAAAATGTCAAAATAATTGCGCACCAAGGTGCCATAATCGAAATTGCTTTTTTAACAAAAATCATAAATCCAAACCATAAATTTGCTTTTTGTAAACTTTTGTCTGTACCAATCCCGAAACGCTCACCCCTTGTCGGTATTATCCGCAACGCATCTATACAGTGTTCAAGTTTTCTTAAATCATCTATTCCAAAGATCTTTTTGCAAAAAGAAAGCCGAGCAGTTTCACACTGCTCGGCTTCTTTGTTAGATCAGAACGGTTGAAATAGGGACGATACGAATAATGTCACCGTTTTCGTCTTTGATGCCGACGGAAAGCTGTTTGTAACGCAATCCGTCATCCACTAAAATGGCTTCGATCACTACACAATCCGCAGTTTCGGCTAAATCCCGCGTCTCTTCTATTACCATTTTCACTCCTCCTCTCAGCTATTATGCTACAAAAGAGTAATATTTGTCAATACCGACCACTAACTTTTTTGAAAATAATGCAATTTTCAGCCAAAATCCGTCATCACACAACGGAGCAACAATATTTTATACGCTGACAAACAGAAAAGCCCGATTTTCAAGCAATCATTCGGGCAACGGAAATGAACGCTTTGCAAGAACCAAAATGCAGTCGGCTGCTCTTTTCACCATAGCGGCAATCACAGAGACCGGCGCCGGTGCTGCCCGCTGCCCCCTCTGCGTTGGTGTCTGCTCCATTTTCGCCGGTGTCTTCGGCAAACAGCTGGAGGTTCAGCGGCAGGCGTGCGCACACCCGGCTCTGTTCTCTGCTGTTTTCCATCTCGGCATACTGTTTTGTCATTGCTGACTCCTTTCCCAAACCGTACGCTGCCGGTTCGTTAAATGATATATTCCCACAGGCATAGCCTGAAAATGGGTATAAAAAGAGCAGGGTCGCAATCTGCAACTCTGCTTTCTGTGGATTATCGATCTTGTTCTTGCTCTGCACGGAGCGCCTTGTACTTTTCCAGTATTTCACCGTACCGGTGTTTAACCTCGGCCTCTAAAGCTTTCATTTCCGGCGTATTACAGTGCCTATATCGGCCTCTTTTCGGAAGCGTTCTTCTCCATTCCTTAAGGATTGCCTCACTACGCTTTGAATAATATTTGCCAAGATCAAGCAACTCCTTTTCTTCTTCCGGATCAATGCCTATCTTTTCCATCGAATGTACGCTCCTTTCCCTAAAATACGGCAGGTCTCCTCGATCAGTATGTGCTTTGCATTTTCTTCATAATCTGAAAAATCCATTCCTTGAACCCGCATGGCGCGGGGCACCTCGTCTTTCGCCTGTTCTTTTGCCTCTTCCCACGCTTCCAGCGTCACACCGTCCATTTTCTCCAGACGGTAGCGGTATTTATGGTCAAAGGCTTCCATCACGCTGGTGCCGTCGGCGATCATATTTGGAATATCTGCGTCATCACTAAATGAAAACTGCGTTTGATCCGCCGGGTGATTATGTATATTGTAACTGCCTTTCATGGAAATGTCAACGCCGGTTAAGTCGATATAATCCGCCTGGTGACTGGTAACAGAATACACTTTGCCAGTGCGGTCAATAACCAGCATGTGCTCCTCGTCGGCACGCTCGTACTGTGTAATAAACCGATCCACATAGGCATTGCGTTCCTGCTCAGACTGCGGATTGATTTGGCCAAGATATACAGCTTCCGCCTGTTCCTCCACCGCCGGTTTATCTACGCCGTTTGCGCCACGAATAACGCCGCCGTTTTTCTCCACATATTTCTCATACCACTGGCTATAGGTCATATCTGCCGGTACGGTCATAGACCGTCCTGTCACCGGGTCCCTTGCCCAGCGGGTGCCGGCGTGACGCTCACCCCGCACCAATTACGACACGCCTTTGCCACCATCTGCTTTGACGCCGATCTGTCGGCCAAGGACGCTGCCCAGCTGCTGGGGCACTCCAAGGTGGAACTGACTATGGATGTGTACACCCACATTCGACAGAGGAGAGCACAGCGTACCGCCGAGCAGTTAATCGCCTTTGTTTCTTTCTGAACGAGTAAGACAAAAGTAAGACAAAAATGCCGTCAAATACCAACATTGGCGTACAAGTTGCCACAAGTGCAAAACAGAAAAAAGCAAAAAAAGAAAGCCCTGAATTTCGCGTAACCACGCGCCATTCGGGGCTTTTTTGGCGGAGAGCAAGGGATTCGAACCCTCGAACACCCGTTTAGATGTTACACGATTTCCAATCGTGCTCCTTCGGCCAGCTCGGACAACTCTCCATATACAGCGGGCGCTGGGTGCGTCCGCTTATTCACTTTTAATCCAAGACCTGGTAGTAAGAGGAGAACTGATTCAGCTTTTCCTCAAACTTATCCTTGGACTGCTGCTTCGGGGTGGGGATGGGATAATGGCCGGTGAAGCAACCGTCGCAAAAATCAAATCCGGACTCCTTCGCAAGTTCGTGAGTAGATTTTACACTAAGATACCCCAAGCTGTCAACCCCTAATTGGCAAGAAATTTCAGAAATTTCGTGAAATTTGCATGCAATCAGGTTTTCTTCGCTATCAATGTCCGTTCCAAAGAAGCAAGGATGCCGAAACGGAGGGGCAGAAACCCGCATATGCACCTCGGTGGCGCCGGCCTCTCGCAGCAGGCTGACAATCCGAGCACTGGTGGTGCCGCGAACGATAGAGTCATCGATCATCACCACCCGCTTGCCCTTGATATTCTCTCGCAGTACATTCAGCTTGATCTTCACCGCGTCCTCACGCTGACCTTGGGTAGGCTGAATAAAGCTGCGGCCGATGTAGCGGTTCTTGATAAATCCAATGCCGTAAGGGATGCCGCTCTCCTGGGCATAGCCCAAGGCGGCGTCCAGGCCACTGTCCGGCACGCCGATGACAATATCCGCGTCAACCGGGTGCTCCTTCGCCAGGTACGCACCGGCCCGCATTCTGGCGTGCTGCACAGACACGCCCTCAATCACACTGTCCGGCCGAGCAAAATAGATGTACTCAAACACACAAATATGGCGTGGTCCGCCGCAATGGGTGGTAATGGAGCGTATGCCTTCCTTGCTGATCACAACGATCTCGCCGGGAGCAATATCCCGCACAAAGTGAGCGCCGATGGAATCCAGCGCACAACTCTCCGACGCCACCACATAAGCATCGTCCGCAGTCTTACCCAGGCAAAGAGGCCGAAAGCCATTGGGGTCGCGAAACGCAATGAGTTTGGTGGCAGTCATCACCACGCAAGAGAATGCCCCTTGCAGCCGGGGCATGATTTTTTCGATCGCCTCTTCCGTGCTCTTACTGTGCAGGCGCTCCTCTACAATAGAATAGGCAATGGACTCGGTGTCCGATGTGCCGTGAAAAATGGCGCCTTTCAGCTCAAACTGGCGGCGCAGCTCCGGGGCGTTTACCAAATTGCCGTTATGTGCCACCGCCAAATTACCCTTAATATGGCGAATGACCAGGGGCTGAATATTGTTTGCGTTTTTGCCGCCGGTGGTGGAGTAGCGCACATGACCGATGGCCATATTACCGGTACCCAGGGCAGCCAGCTGCTCCTTGCTGAACACATCCGGCACCAGTCCGTCGCCCCGATGGTGGCGAAACACGCCGTCGTCATTCACGGCAATGCCGCAACTCTCCTGTCCTCTGTGCTGCAAGGCAAACAGAGCCAGGTACGCCGTCTGGGCCACCGTGGTGGTCTGATTTTCAAATACGCCGAAAACACCGCATTCCTCGTGCAAACTATCGAACATCGCTTTCTCCTATCCCGTGTGGTTGTCGCTCTTTTCTCTATTATAATACCATTAGTTGGGCGTGTAAAGGTTTGCGTAAGGTCTGGAGGTGGCGGGAGCCAACTTTTTGAACGGTTTTTTCATGATCTCGTCCATAGAAACGCCAAAATACTTGCAGTATTTCTTCAAATACCCCTCCAATTCCTGCCGGTCCGCGTCCGTTAAGGCCGTCACTTTAATGTTCGGGCTGATGTTCTCCTTGGGGAAGCTGCCCCGCACAAAGATCTTGCCTCCGTGCATGCCGGAGGCGCAGTGGGTGCCAAACAGCTTTTCGCCTCGCTTCATACCCAGCCCCAGCAGCACAATGGTACCTCCGGCCATATACTCGCCCAAGAAGGAACCGGCATTGCGACCGATCACCAGCACCGGCTTCATCTGTTCAAATTCCTTCATATGGATCCCGCCGCGGCAGGCCACATTGGTCTCTACAAAGATCTGGCCGTCCCGCATACCATAGCCCATAGCGTCGCCGGCGTGGCCGTGAATGACGATCTCGCCGCCGTTCATAGTGTTGCCCACTGCATCCTGGCAGTTGCCAAACACCTCCACCTTGCCACCATTTAAGTAGCAAGCCATATCATTGCCCGGGGTGCCGTGCACCTGAATGGTTTTGCCTGCGTCCAGGGCGCAGCCGATATAGCGCTGACCGTTCACCGCCGTGATCGTTACCTTTTTCTTGGTGCGCAGCTCCTGCTTAATTTTGTCGTTCAGCTCTGCATACTTGCACAGTCCTGCCTCAATGCTCACAACTGCACGCCTCCTCTCAACTTGGTGATCCGGGTCTCCTTGGGAAACCAGAACAGATTGGGACTATCCATCAAATCTCCTTGCAAACTCTCCAACGGCACACCGCCGGAGATCAAAGATGTATAGATTCCGGCGTTCTCGCTGGCGTTGATGAGCACATAGCCCACCAGCTTGCCGTCCCGGAACACCAGGCGCTTGTAGGTATCGTCTGCGGCAGCCACACGGTCCGTATAGCCGTCTCCCTTAGCGTTGATCAGCCCGCAGGTGCAAATGCGCAGACCGTAAAAATCAATAGCATTCACCGCATAGGTACCGCCGACGGTCAGGTCGCCGCCGGCCATTTGGCTGCCTGCGGCACGTCCTTGCGCCACTGCATTGGGCCACAGAGCCAAGATTTTCTTACTACCGTCCAACATGTCCACAGACACGGCGCAATCCCCTGCGGCGTAAATATCCGGGTCCGAGGTCTGCATGGTGGCCGGATCGGTGATAATCCCCCGCTCCACTGTCAGACCCGCCGCCTCAGCCAATGCCGTAGCCGGGCGCACGCCCACTGCCACCACCAGCAGATCGCAGGGCAGTTCCTTGCCGTTTTGCAGCACCACCCGCTGCACCGTCTTACCGCTGCACTTGGCCCGGGTCACCGTTTGACCCAGGTGGAAGCGCAAACCGTGGTGCTCTAAATGGCGGCGCACCAGCTTGGCGCTCTTTTCATCTAAAATAGAGGGCAACACCCGACCGGACAGCTCCACCACATCTACGCTTTTGCAAATTTTGCTCAAGCCTTCGGCGGCCTTCATACCGATCAGCCCGGCACCGATCACCACGGCGCGGGTGTTCGCACTTGCCAGATCGTGCACAGTCTGGGCATCTGCCGCGGTCAAAAAGCCGCACACATTGCGCTTGCCGCTTACATTCTGCATCGGCGGCACAAAGGGCACGGAGCCAGTGCACAGGCACAGCTTATCATAGCTATACACCTTGCGCCCGCACTTAACAGCCTTTTTTGCCCGATCAATGGCGGTCACCTCTACGTCGGTGACAATCTCTATTTTTTGCTCTTTATAGTAAGCCGGGGTGCGCAAGCGCATTTGACCCCGCCGCACCAGGCCTTTTAAGTAATAACTGATAGACGGACGAGAGTACGGCAGATCCGTCTCCCGCGTCAGCAGGGTAATCGCGCCTGCCGGGTCCGTTTTGCGAATTTGCTCCGCCGCAGCCAGTCCGGCGGCAGAAGCACCGATGATCACATACTTCACTTGGCAGCACCTCCCGCTTCTACCCAAACCAAGGCTCGATTGGGGCAACCCTTGACGCACGCCGGTTCTTCCCCGCCGCACAGGTCGCACTTGTAGGCAATATTGCCGGGCTGAATACACCCGATGGGGCACACCGCCAGGCAGGTCATACAGCCGATGCACTTGTCCGGGTCTACGGACACAATGCCGGTCTTTTTGTCCTTGTGCATAGCACCGGTAATGCAGGCCTTTACGCAGGCCGGGTCATCGCAATGACGGCAGTTCACCGCCACAGAGGCTACACGGTCGCCGTACACCTTTACCCGGCTGATGGGCGCCGGATTCTCATATTTATTGGCTGTCAGCACATCGCCGGAAGCTGAATGTGCCGTTTTGCAATAGACTTCACACAGGTGGCAGTTGACGCAAAGTTCCTCTCGTGCAAATACTTTTTTCATCTCACTGTCCTCCTTTATTCCCCGGCGTGCTTAATGCCCAAAATTTGCAGTTCCCGATCAGACAGACCAATACCACGGAGCATCAGTCTGTTGCCGCGCAGGGAGTCTACGGAGTTGATGCCCATGCCGCCCATGATCTCTTTCATCTCATGGTTCCAGGCAGAAAGCAGGTTTTCCACCCGCTGATGGGCGATCTCCGGATTCAGTCGCCGGGTCAGATCCGAACGCTGGGTGGCAATGCCCCAGTTGCACTTACCGGTATTACAAGTCTGGCACATATGGCACCCCATGGCGATCAGCGGCGCAGAGGCGATATACACCGCATCCGCACCCAGAGCAATCGCCTTGATCACATCAGAGGAGCAGCGAAAAGAACCGGCAGCCACCAAAGACACGGTGGAACGAATGCCCTCGTCCCGCAGCCGCTGGTCCGCAGCTGCCAACGCCAGTTCAATGGGAATACCCACATTGTCGCGTATGCGGGTGGGCGCTGCGCCGGTGCCGCCGCGAAAACCGTCGATTACCACAATATCCGCACCGGCACGAGCCACGCCGGAGGCGATGGCCGCAATGTTATGTACCGCTGCAATCTTAACGGAAATGGGTTTTTTGTTATCCGTGGCCTGCTTCAGCGACCAGATCAGCTGGCGCAGGTCCTCAATGGAATAAATATCATGATGCGGAGCAGGTGAAATGGCGTCCGATCCCACCGGGATCATACGCGCATTGCTGACCTCCACATTTACCTTTTCACCGGGCAGATGGCCGCCGATCCCCGGCTTGGCCCCCTGGCCGATCTTAATTTCCACAAACTTGGAGTTATTCAAATAATCCTTATGCACACCGAAGCGGCCGGAGGCCACCTGTACCACGGCACAGTCGCCGTAAGACGCCAGGTCCGGGTGCAAACCGCCTTCACCGGTATTAAACAGAGTGCCCATATTCTTGGCAGCCATGGCCAGAGATTTTTGGGCATTCAGGCTGATGGAGCCAAAACTCATGGCAGAGAACATAATGGGCGTCTCCAACATCACCTGGGGCGGCATCTTGGTCACGGACTTGCCCTTGCGCTCCACTTGCAGACGATCCGGTTTACGACCCAGAATGGTACGGATTTCCATCGGCTCCCGCAAAGGGTCAATAGATGGGTTGGTCACCTGGGAGGCATTGAGCAAAATTTTGTCCCAATAAATGGGATACGGCTGCGGGTTGCCCATAGCGGACAGCAGCACGCCGCCGGTATTTGCCTGGCGGCAGATCTCTTGCTGATAGCGTGGGGTCCAGTTGGCATTGTCCCGATAGTCGCACACATATTTTTCGATCCGAAGGGCGCCGGTGGGGCACAGATCCACGCACCGATGGCAGGCCACGCAATCCTGAGAATGGGACACCACGGTTTTGCCGTCCGATCCAAAGCTGTGGCACTCGTTGGAGCACTGACGCACACAGCAGCCGCAATCAATACAAAGTTCCCGATCCCGCACAATGGTAAACCGGCGGGGAATATAATTAATCATCGTCTTCCTCCTTTGCCAGTTCCAGTGGGATAAACACCGGCTCCGCACCGCTGACGGACCACACTTTTTCCGGGTGGGGGCAGATCACACGAATGGCGGACTCCTCTGAAGCGAAATACGCCCGATTGCCCTTGGTAGCCGCAGTCAGGGACCGCAATTTCAGCCGGTCGTTGATGGCCAGCAGCCCCTTGTTAGAGCCAAGGATCACAGAGAACGGCCCGTTCACCAAGGCGCCGTTATAGATAGAGCGCAGGTTGGTAAAATATTCTTTCCGCTCCGGGTCCATACGGTCAATCTCGTCCCACTCCGGGGCCGTAAGCACATCGGCTGCCACATCAATAGGCAGCTGATGGTGACGGATCAGGTGGTCAAACAGATAAGTAATCACTTCCGTATCCGTCTGCATGGTACACACATAGCCAAACTGCTCAATATACCGACGGTTGGCGTCATAGGACGAAATCTCGCCGTTATGCACCACAGACCAGTCCAGCAGATTAAAGGGGTGTGCCCCGCCCCACCAGCCGGGGGTGTTGGTAGGAAAGCGACCATGTGCTGTCCACAAATAGGCATCATACTGATCCAGCATGTAGAACTCGCCCACATCCTCCGGATAGCCCACAGCCTTAAAGCAGCCCATATTCTTGCCGCTGGAAAAAATAAAAGCGCCGTCGATCTCGTTGTTCACATGGATCACGCACTGGGCGGTATATTCGTCCTCGTCCAGACGGGCCTCTTTCATCCGCACTTTATTGGGCTTGGCAAAATACCGCCAAATGTCCGGCCCGTTCTCTATGGACGCGATCTTCTTGGTGGGAATGCGCTCGGAAACATCCACATTAAAATGCTTGAACAAAAACTCCTCGCAAGCGCCTCGTGCCAGTACCGACTGGTAAAACACATGAAAGGCAATATCCGTCTTGTGATCGGGATAAATGCCATAGGCGGCAAAACCGCCGCCCAAGCCGTTGGAACGGTCGTGCATCAAGGCAATGGACTGGATAATCTCCGACCCATTGATCGGCTCACCCTTGCGGTCAATAATGGCGGCAATGGCGCAGCCGGAGGGAATGCGCACTTCGCCCTCTCGCAGCATATTCATCACTCCTGTATCTGTATTTCTTCAAAAAAACCTATACTTTATTGTACAACACTGTCGATTACCCGTCAATGCGCCCACTATAAAAATCTACAACACAAAATCCGCATAATTATAGTGAATTTCACAAAGAATTGCGCTCTATTCTGTGAATTGCCGCTCACTTTTGGTTCTTTTGTACAAAAAAGCGGCTTTGCCACCGTATAATGGCAAAGCCGCGATAGGTAGGGACAATCAGTCGTCCGTGCCCTGGAGAGCGTCATAGCCCCGTGCGCCGGTGCGCACCTTTACTGCGTCCTCCACATCATAAACAAAGATCTTACCGTCACCGATATTACCGGTATATAGCGCCTCTCTGGCAGCGGCGATCACCGTTTCCACCGGCACGGCGGAGATCACCATTTCCAGCTTCATCTTGGGGTTCAGGTTCAACTCCTCGATCTCCACACCGCGGTACTTGCGCACATGACCCTTCTGGGTACCGCAGCCCATTACATTGGTCACGGTCATACCGGTAACACCCACCGCATTCATGGCGTCCTTCACCCGTTCCAGCTTGGCCGGGTTAAAGAGCATCACCACTTCGCTGAGCTTCGCGTCCGGTTTGGTGGTATAAGTCTCTACCGGAACAGCCTTTTCTACCGGAGCAGCCGGCAAGCCGCTTTCCGTTACCGGCACGGCAGCAAAGCCGCCGCCGACGGGCATAAAGTCCGCATAGGCAGAGGGCAGGTTGTGCTCGGTGGCGTCCAGCCCCTTGATCTCTTCTTCCGCGCTGACCCGCAGGCCCACAGTCTTGTTCAGCACAAAGAACGTAATCGTCAGGGTTACTGCCGCCCAACCGGCCACAGCCGCAAAACCAATCAACTGGGTGCCCAGCAGGTGCAGCCCGCCGCCGTAGAACAGACCCGTATGGGTCAGGCCGGACACTGCATAGCCCGGTGCTTTGTCCGTGGCAAACAGGCCTACGGCCAGCGTGCCCCAAATACCGTTGGCCATGTGTACAGCCACAGCGCCTACCGGGTCGTCAATATGCAATTTCTTATCCAGCAACTCCACAACCAGAACCACCAGAATACCGGACACAGCGCCGATAATCCCGGAGCCCAAAGCGTCCGTTACATCACAGGAGGCAGTCACAGCCACCAGCCCGGCCAAAGAGCCGTTCAGGGACATGGACACATCCGGCTTGCCGTCCTTGATCCAAGTAAAGAGCATGGTGGTGCAAGTTGCCACAGCCGGCGCTACGGTGGTGGTCACCAGGATAGACGCCAAAGTGGGTACATCGGTAGCCGCCGCGCCGTTAAAGCCGTACCAGGCAAACCACAGGATAAACACGCCCAGCGCGCCCAGAGTCAGGGAGTGACCGGGAATGGCTTTGGGTGTCTTTTTGCCGGTTTTTTCGTCCGTATGGTACTTACCGATCCGGGGACCGAGAAAGATGGCGCCGATCAGTGCCGCGATACCACCCACCATGTGAATGGCGCAGGATCCGGCGTAGTCGTGGAAGCCCAGCTTTTGCAGCCAGCCGTTGCCGTCCACATTCCAAACCCAGCCCGCCTCGATGGGATACACCACAGCGGAGATCACCGCTGAGTAAATGCAGTAGGCAGAAAACTTGGTACGCTCTGCCATAGCGCCGGACACAATGGTGGCCGCCGTGGCACAGAACACCAGGTTAAATACAAAGTTGGACCAGTTGAAATCATTATAGTGGGTGAAAATGCCCAGGTTGGGCAGACCGATCACCCCGGCGATATAGTCCTGACCGCACATCAGCCCGTAGCCCAACAGAATGAACATCACCGTGCCGATACAAAAGTCCATCAGGTTTTTCATAATAATATTGCCGGCGTTCTTGGCTCTGGTAAAGCCGGTCTCTACCATAGCAAAGCCGCACTGCATAAAGAAAACCAGCACTGCGCCGATCAAAAACCACACACCGAACAGCTCGCTGTTCACCGTTTCCATGATTGTTTCAAGCCCCATAAAATCCTCCTTTTCATCAAAAAAGCTTAAAAATGGAAATAAAAAAAGAGCGCTCGAAAACAGACGTTCGAGCACTCCATTGTGCTAAAGAATGCCGACACCGCGCCAATGGCCCGGCGCCGGCAAATGACCGACCCTGTCAAAAGACAGTGCCGACCGTAAGAGAGGGCAAAATCAATACAGTACCATGTACTTGTCGATCTCCCACTGAGAGACCTTGGTGCGGTACTCGTCCCATTCTTTCTCCTTGCCTTCAATATAGTTATTGAACACATGGTCACCCAGGGTTTCCTTAATGAACGGATCTGCCTTAGCGGCGTCAATAGCCTCTTTCAGGCTGCCGGGCAGACAATCAATGCCGGCGGCTTTCAGCTCCTCGTCGGACAGACCGAACACATTGTAGTCAATGGGAGAAGCGGGGGTCATCTTTTTCTTAATTCCGTCCAGACCGGCAGCCAGGCACAAAGCCATCTCCAAATAGGGGTTGCAGGTGGGATCCGGGCAGCGCAACTCTACGCGAGTGCCCTTGCCGCGAGCAGCAGGAATACGCACCAGGCAGGAGCGGTTGGAAGCGGACCATACCAGGTAAGACGGTGCCTCATAGCCGGGTACCAAACGCTTGTAAGAGTTCACGGTGGGGTTGGAGAACGCTGCAATGCCGCGAATATGGGCCATAATACCTGCGATGAAGTTATAAGCGGTCTCGGACAGGCCCATCTCGCCGTTGGGGTCATCAAAAGCGTTCTTGCCGTCCTTCAAATAATACAGGCTCATGTTGGTGTGCATACCGGAACCGTTGATACCATAAATGGGCTTGGGCATAAAGGTGGCGTGCAGACCATGCTTGGTAGCGTAGGTCTTAACCACATGCTTAAAGGTCATTACACGGTCGGCACTGAGCATTACATCACCAAACTGGAAATCGATCTCGTGCTGCCCCTCGGCCACCTCGTGATGGGAAGCCTCAATGGTGTAGCCCATATCCTCCAGAGCCAGGCAAATATCCCGACGGCAGTTCTCGCCGTGGTCGATGGGGTTCAGGTCAAAGTAACCGCCCTCGTCGCCGGTCTCCAGGGTGGGGTTGCCGTTCTCGTCCAGCTTAAACAGGAAGAACTCACACTCCGGGCCAACATTAAAGCCAAAGCCCATCTCGGCAGCCTCGTCCATCACCTTTTGCAGCACATTGCGGGGGTCGCCCAGGAAAGGAGTCTCATTATCGGATTTATATACGGAGCAGATCAGTCGAGCGGTCTGCGCATTCTGGTGCTTTCTCCAGGGGAAGATGGTCCAAGTGTCGTAATCCGGGTGCAGATACATATCGGACTCATCAATGCGAACAAAGCCGTCGATGGAAGAACCGTCAAACATACAGTCATTGTCCAGCGCCTTCTCCAGCTGAGACAGGGTGATGGCCACATTCTTCATAATGCCAAACATATCCGTAAACTGCAAGCGGATAAACTCTACATTATTTTCCTGTGCACTTTTGATGATGTCTTCCTTTGTGTATTTACTCATAGCAAATACTCCTCTCTTAAGAAATGATAGATAGCACAGAATTTTTCTACTGCCAAAGGCAATAAAAAATGAGGGCGCTCCGCTATCAACGGAACGCCCTCGTTCTGAATACAATGCCATTATAATCACATTGTCCCGGGTTTGTCAACGGTTTTTGACAACTTTGGCAAATCTTGTAATTGGCGGCAGGAATTGTGCACGCCTTTTGTACAATATGCACAGGATAGACAGACTGTTTGCTATATGTCCAAAAATTCGGCGGGAATCACTTTTTTCGACAGATCGGTAAAATACTTCACCGTGGCACCCTTCTGCGCCTGGGTGGCGGCCAGCTCGTCGGTATAATCACTGAGCTTATAGACGGAAAACACAAAACCGTTACCGCCCCGGCTGTAATGGCACACCACCGGCGCCAATTTCGCAGAGGAGATGGTGATCTTTCCATTATCCTTTTCGATCGTCACCTCTGCCATACCGCCGCACAGTTGGGGCAGATTGATCTGGTGGCTGATAAAATTACCCAGGGAGTAGTAGACCAGCATTTTTTTGCCGCTCTTTTCGTTGGTCACCCACGCCACCGGCTGGAGCACATGCGGGTGGCTGCCGATGACAATATCTACACCCAGGTCAGAAAACAGCTTCGTATATTCCTTTTGGTAATCGGACACCTTGTGGCTGTTCTCCGTGCCCCAGTGAGGAAAGACCATCACCACATCCGCATGCTTGCGCGCCTCGGTAATGTCCTTCCGGATCTTGTCCTTGTCCATCAAATTCACCAGCCAGGGCTTGTCCTTGGGCAAGTCAATGCCATTGGTGCCGTAGGTGTAATTCAGCAGAGCAAAGGTAATATTGTTCTTCTCATAATAAGTAATCTTGTCATAATCCGCCTGAGAGGCGTTGGTGCCCAGGTGCACCGCCTCTTTATGCTTGCCGAAGTATTCCAGCTCTTTCTCCACTCCGGCACTGCCCATATCCATAGTATGATTGGTGGCGCAGGTAAAAATATCAAACCCGGCAGCAATGGCGGCGTCGCCAATCTCCCAGGGTGAATTAAAGCAGGGATAGCCGGAATAGTCAAAGCTGCTGCCGCCCAGCACCGTCTCCTGATTGATAACGGCAATATCCGCCGGTTCAATGTACTGCTTAATATCCTGATAAAAGGCGTCGTAATTCCGGCTGCCGTCCTTTTGCTCTCCGGCAGCGATTAGGGTATTGTGGATCAGGTTGTCCCCTACTGCCACCAAGCGCACCCGGGTCTTGCCCTGGGTCTCCTCCGTATGATCCTCCGTTTGGTTAACCACAGACACCTTGGTGGGCGCCGTAGGCTTCTTCTCATCTGCCCTGCGGGTAATGGTGCCGCTGATGGCAAAGGCAACAATTACGGCCAGTGCCACCAAAACAGGAATCAACACCTGCCACAGTTTTTTCTTCTTTTCCATATAGTCACATCCCAACTGCCAATGGGCTTTTCTTACAGTTTCCGCGTTCTGCTGTGATTATACCATACTCCTTACTTTTAGGCAAGAAAAAGCCGCTCTCCGAAAAACGGAAAGCGGTCTTTCATTTTTGCTAAAGCAGCGATTACTCGGCAGCAGCCTCTGCGGCAACTTCCTCGCCGTCCTTTTTCTTCTCCGGCATGAGAACGAACTTCTCCATGGGGAAGAGTACAACCATCTGCACGAAGCCGGCGCACATGGAAGCGATCAGACGAGCCACAGACTCGTTGGTGATGATCTTAAAGAACCAGTTGCTGGGCTCCAGCTTCAGCATAGCGCCAACGATGGCACCCTGCATCCAGGTGGAGAACAAAATCAGCGCCAGCAGCAGCACAATGTAGATCACAAAGTTGTACCAAGCGGAGTCGGACTTAAAGGTGGTCTTTTTGTTCTGATAGAAGCCGTAGATGTTGGCGATCAGGTTGGACAACAGGAAGGGCAGCACATAGCCCCAAGTCACAACGCCATCGATCACATACTTAGAAGCCTCTGCGGAACCGGTGGAAAACATGGCGGGTGTAAAGATCCCTCTCAAGAACTCCGGCAACAGGGTGTGGATCTGGTCGCACACCAGCGGAAGCAAAGCAGCCAGTGCCAGCTGGATGATCGTTACCAAGCCGGATACCACCAGGAACTTTACAAGCTGCCAAAGGGTCTTCATAAAGGAGCCCTTTTCCTCAGCAGCGTTGTCGATACCGCCAAGGCTAATTTTCTTCTTTTTGTCATCTGCCATAATTATTTTACCCCTTTCTCATGGACTGTACAAAAATAACGGGTTCATTATACTATTTTTTGGCTAAGATTGCAACCTTTATTTTACAGAATTAAAAAACGAAAGGCAGCGTGCCAATACAGCCGGTGGTGGCAGCGTGCACAATGGCAACCACAGCCCAAACCACCAAAGCGATCAGGCCAACGAGGATCGCCAGCACCAGAATCACCAGCAGCACCAGGATCGCCAGCACCAGCGGGCCCTTTTTGCTGGGGCGCACCGGGTCGTCAAAGGCGGGCTTTTCTGCCTTTTTCGGCGCCGGGTTCTCATCATCGTACAAAGGATACAGGGGCAGCGTGGCGTTGGCGTCGCAGGGACCCGGATTCCACAGCAGCGGCTCTACCAGACCGCGCACGGAGGTGGCACCCTTCAGCACCTTGCCGATGGAGAAGTGAATGGTGTTCAGGAACGCGTCGATCACGTTCAGCAACCCACAGCAGATCTTGTACTCCCGCGTATTCGGACCGTAAGGCGAGTCGCCGCAATACAGATTCTGCACCAGCTCCAGAATAAAGTCCACTACCCGATGATCGGCAATGTCCGCAATATCTTTCTTGGAAAGGCCGCTTTCTTTCTTGCACAGGCGCCAGGCTTTCTTAAAAGTCAGCTTGTTCAGCCACTTGGCAATGGGCTTAATCAGCCAGCCCAGTTTTTTGACCTTTTCGCCGGGAACGGAAAAAGCGTCTGTCATCTCTGCCAAATGGTCAATATCCGTGGCCGCAGCGTCCAACAGCTCGGAGATCATACCGAAGAAGAAAGTGCGCATATACCGGTCAAAGGGCTTGCCGCCGGTGTCCAGCCCCGGCACATCGGTAATGGTCACCGTCTCCACATCCACTTTGGCGTGGGCCGGGTCCAGCGTAATGTTGCGCATGGTGGGCGGGCAGCCGATCATAGCACCGCAGGCAATGTCATAAAAGGTGTTGCCCTTTTTGGTCTCTACCACGCTGATGTCGTGAATATGGGTGTGACCGGTGAGCATACATTGCAGTCCGTTGTCCGCAAAAATCTCCCGGGTGGTCTCATGATTGCGCTGCATATCCCCCTTGCCGATAATGGCATAAAAGGGACTGGGGGCGATCATGGGGTGATGGGTCATAGCGATCACAAACTGATCATTTTTGCGAGCGTCCTCCAACTGATCCAGGATCCAAGCCATACAGTCGTCGCTGTACCCGGAGCCGCTCTCCCCCTCCGGCTTATAGTTGGTATCGTCATTCAGAGCAAACAGCCGATAGCCGGGGGCCAGCTGCACCACATAGCTCATGCTGTCCGGGTGGGTGGCAATGGCCTCATTGGGGCCGAACTCATAGTACATCTGCCACAGATCGTGGCGCTCCTCCACCGCCGGCACCTGAATTTTTTTGTCGCCGTCATAGCCGTCTGCCACGCCGCCGTCCCGATAATCGTGGGTAGCAGTGATCACATACACCCGCTTGCCCCGCTTTTTCAGGTCCCGGAGCATTTCAATAAACTCGGCGTGAGAGGCCAGCTCTCCGTCCCGGGTGGTATCGCCGGCCAGCACCACAATATCCGTGGAAGTGTCCGCACACAGCAAATCGAACCCGGCTTTGATCACCAGATCGCTGTCCTTAATGATCTTTTGGCTCTTGGCCTCGGCTCTTTCGTAAGCCTTGCCCTCAGTGCCCCCCTTGCGGGAGTAGTAATGCGTATCGGTGATAAATTGAATTTTCAGCGGCGCATTGCCTGCGCCATACAACTTCGCTGCCATTGCGTTCTCCTTTATTTAATCTCTGCCTTCAGCACGCCGCTGCGCACCGTGCCCGGCAGGGTAATCTCCATACAGCCGTCACTGCGCAGAGCGTAATCCAGTTCTTGCCCATCCAAGGTCAGCTGATAGCTGTGCGCATCCGACAGGGTGAGCACAAAGGCATACTGCCCATTGTCGCCGGTGTAACGGAAGTGGACCTCCGCAGAGGTGTCCGTAAGCTTCTGACTGTCCGTCCACACATCCAGCCCGCAGGTAAAGGTGCCTGGACGGTAGTAGCAGTCCGCCCACACATTGATCGGCGCGGACAGGCCGCCGAAATTGTGGAACCAACCGCCGCGGCGGGTCTGAATACCAAAGCACTCATAGGTGTTGTAAGAGAAGTCCGTCTCTTCCTTCCACATATCCAGCGCCCGGCGGGCGATCTCAAAGGCAAATTCCGTCTCGCCCAGATCAAACATGGTCTTCCACATAAAGAACTGGTGGCTCATCCACACATTGCCGTTCCAGTAGCCGTCGTCAAAATAGTAGGAGGCTGTCATATCCACCGCGCTGATGCCGGCAGCGGACCACATTTCGTCCGGGTTCTTAATATGCGCCAGCAGACGCTCCCGCCGCTCCTCCGGGGCAGCCCCGGCAAACAGCGGATACACACCGTCCATGCCTTTGTCGTAGTTCTCCCCGGCGTCGGTGGTGAAAATGCCTTGATAGTTTTTGTCATCGTCATAGACGGAGTAGGCGTAATAGCCGCTCTTTTCGTCCCAGCTGTAACGGTTCAGAGCGTCGCTCATCCGTTGAATGTCTGCGTCATAAGCGGCAATGTCCTCCTCCTTGCCCATGGCGGCAGCCACCATCTTCATGATCTTGGCGGCCCGAATGGTGTGGGAAGTAGACAGGCAGGGGCACATATATTGTTTCTTATCCTGGGCGATCATGGCCACCTGGGCGGGATAATCGTCCATACCGCTGCAAGAATACCAGTAGTCGTAAGTGGTGGTCAGGCCGTTGCCGAACTTGCCGCAGGTGGAGCCGGGGGTCTTGCCGCTGATATAGTCATAATACCGCTTCATCTGCGGATACAGAGCAAACAGGGGCGCCTTGTCCTCCGTGCGGTGCAGCAGTTCCAAATACTGCACAAACTGGGTAGGCACCAGGGAGCCATGGAGCAAAAACGCAAAGTCCGTATTCTCCGGCTGGGACAAATAAGTCTCTAAAATGTAGCGGCATTTCTCCGGGCTGAACTCCAGCACACCGGTGCCGATCACGCCGCTGTCCCAGGTATAAAAGCTGTCCCAGCGCTTGCCGGGGGTGTAATGTACGACATTCTCGCCGTGCTTGTACACCGGATATACCAAGTTGGTCAGGAGTGTTGCCCGCAGGATCTCGGTAGACAGACTGTACTTCTGTCCCTCCCGATTGAACAGTACCGGAGTGGCCAGCGCCTTGGCGGCGGTATACAGCTGCTCGTATTCTTCGGTGGTGCGGGGTTCCACCTTGCCCTTGGACAGCACCGCATACTCTATATGCTCTGCGTGGGGGTCAATAAAGATGGAGGGCATCACCGCATTGTAATAGTAGCCCTCGTCACTTTTTTTGCGGCGGAAGGAGCGAGAAAAGGTCTCCCTTAGGTCGTCATAAGTGGGGTCGCCGTTAGACAGTCGGTTAATCAGCGCATCCTCCAAGCTGCCACTGTCCAGTTCCCGTCGGCGGGTCTTGGGATTGTGCGTCAAGATGGAATAGCAGCCTTCCGCATCCTTGTAAGTTAGGGTAATGCGGGTGGCGCCGTGCACCTTTTCTTCTTCAATTTGCGGCTTGGTGTCGCGCAGCACCGTGCGGGCGCTGACTTCCTGTTCCGTGCCCGGCCGGCACAGCACCAGCACATCCAGCTCCACACCGGCGCCGCCCTGGCTCTCCAGGGTCAGGGTGTCTGCGCCGTCATAGGGCAGCGCGGCAAAGGTCAGGCTGTCACTCTCCGGCAGTTCTGCCGCTACGCCGTTGACGGTAAAGGCAGCAGCGCCCGGGGTCACTGTGCGATAGCGCAACAGCAAGGTGGCGCCCGTCGGTCGGAGAGACGGCAGTGTGTATACCACTTTGTCCCCGGCAGTGCAGCCAAAAGGCTCCAGCCCCAGGAAATCCACATGGTAATTCTCGCACCGGTCACCCAAACCGTGGGCGTGGTAAAAGTTGCCGTCGGCAAACTCGCCCTTGTGCATACCGTCCGGGTTCTCATTATCCCAGGGACGGGGCTTTGCATAGGTGTACTGCGTATAATCGTTGGCATCCACCAATGCGGCATCCCCAGGCAGCTGCAAGACACAGTGCTCCGGCGCCGGGAACTCCAGTGCGCCGAAAATATTCAGAATGCAGTTTTGCGACAGGTCCGTATCGTTCACAAAGCGGCAGCGCATCAGGTAGGACTCCTCGTCCAGCCGGGTGTAAGACACATCGGCATAAATTTGGTCCTTCCACATCAGCTCATAGCGATAAGAATAAAAGCGAAAGTCCTCGTCACAGCTCCACAAGTGGTAGCCGGACGGCACAGTCACATTGGGCACCGGGGTAGCGGAATTCCACAGGGTGGGGTGCACTACAAAATCATAGCGGGCACCTTCTGCCGCCCGATCGTCCACAATGCGGGACAGTCCCATATATTTCTTGGAATACGGTCCCCAAAGGGGCATACGGATTTGAGATTTTTTCATACGCAGTTCTCCGTTTTTTGATTTTTTTGCAAGGATATTATCATCTTTTTGCCCGCTTTTGTCAATAGTGAACACCTTGACAAACCAGATATAATACAGTAATATATATCTGTTAAAAATAAATCAAGTTTTTGCAGAGTAACGGAGACAAGTCTATGAACATTGACGAAAATGTACAAAAGGTCATCAAACTGCTGCTGCGCAAGTGGAAGCTGCTGATCCTGTTTATGCTCATCGGAGCGCTTTTGGCCGGGGTTTATACCGCCAAATTCACCACCTTGACCTACACCTCCAGCGTGGAGTTCCTGGCTGCAGCAGTGGATCCGGCTCACGAAATCAGCGACAGCACCGGCGAGGTGGCCCGCACCAGCCAGACCAGCAAAATGAACTACGCTATGAAGATGATCGATACCTATATCGAGATCTTCAAGACCAACAAGTTCTGCAGCAAAGTGGCAGGCGAGATGAACAAAAAATACTACACCAACCTGTCTCCGGCGGATATTAAGCAATCTTTTACCATTGAGACGGTGGAGAACACAGCCATGTTTAAGCTGATCGTCACCTCCACAGACCCCACCCTATCCTACAACATCGCTCACCAAATGGAGGAGAGCGTGCCGGAGCAGATGGAGGAAACCAACAATGGCCTGGTTCAGACTACCGTGGAGGACAAGGCCATTAAGCCCAACACCGCCGAGGGCCGGGGATACTTAAAGAACTGCCTGCTGGGTGCCGTAGCGGGACTGCTGATAGCTGCCGCATATGTGATCCTGCGGGATCTGTTAGATGTGCGCATCAAGAGCGCCGAGGAGCTGAGCCAGCGCTACGATGTGCCGGTACTGGGCTCTATTCCCGCCTTTACAACCGGCAAGCGCAGTGCTGCCGCCAAGAAAAACACAAAGAAAGAGGCGAAATAAGATGGCTAAAAAAGCGAACAATCCCTTTGCCCGCACCCTGATCTCCAATGCCAACATGGATCCGGCGCAGAAGTTCCGGATTGAGGAGGCTTACAAGAGCATTCGTACCAACATTATGCTCTCCATCCTGAAAAAGGGATGCAAAACCATTGTGGTATCCTCCGGCTCCCCTGCCGAGGGCAAAACGACGACCACCATCAACCTGGCCATCTCCATTGCCCAGGCAGACCAGCGGGTGCTGCTTATTGATTGCGATCTGCGCAAACCTAAGATGCACCACTACTTTGGCGTGTCCAATGCACCGGGACTGACCAACTACATCAGCGACTCGGTAAAAAACAACGGTCCTAAGACGGACCTGTACAGCATTATCCACAGAACAGAATTTCCCAACCTATCGCTGCTGTGCGCCGGTTCCATTCCGCCCAATCCGGCAGAACTGCTGGGCAGCGAGCCCATGGCTGAGTTTTTACAACAGATCAGCCGGGACTACGACTATGTGATCATTGATACCCCGCCGCTCAATGTGGTGTCTGACGCCCTGCCCATTATTCGGGAGTCCGACGGCGTAGTGATCGTGGTGCGTGCCAACGGCTCCACCCACCCGGAAGTGCAAAAGGTGATGGAATCCCTGGAGTTCATTGACGCCAAGGTGCTTGGCTTTATTTACAATTTTGCAGAAGATAAGCGCTCTCGCTACTCCCGCTACAAGTACGGCTATGACTATGGGTATGGCTACAATTACGGGTATAACGCCGACGCAGAATAATCGGATAAGGTGATGCTATGGTGATCCCCGGCTTAATTGAAATGCACTGCCACATTCTCCCCGGCGTGGATGACGGCTCCAAAGATACGGAAACCAGCGTAAAGATGCTCCGCCGCCTGGCGCTGCAAGGGGCAGAGACCGTAGTGCTTACGCCCCATTATTACTCGGATTCTATTTCTTTGGCGGACTTTACCGCACGACGGAACGCGGCTTTTGCCAACTTGCAGGCTGCTCTTCCCCCGGACGCGCCCCGGCTGCTGCTGGGTGCAGAGGTGTATGTGAGCCGCTATCTGATGAATAATGCAGACCTGACCCCTATCTGTATCACAGGCACGCGGTGCGCCCTGCTGGAGCATAACTTCAGCGATAACTTCGGCTCAGAGACCCTGGATCGGATCACGGCGCTGACCTGCGACCAGGGCATACGGCCTATTTTGGCGCACATTGAGCGATACAAAGCACTGATGGATCACCCCGGTTTAATTGACGAATTGCGAGATATGGGCTGCGCCACCCAAGTAAACATCAGCGCCTTTGCAAACGCCTCCTTTGGGGTGCGGCGCAAACTGCTGAAGTATCTGGACAGCGGGCGCATTGACCTGATCGGCTCCGACTGTCACAACCTGGGCACCCGCCCACCGGATTATGCAGACGGCGCCGCCGTGATCGTCAAAAAATTCGGTGACAGCGCCCTGCAAGCCTTAATCCAAAATGCCCACACCCTGCTGGGCTGCTGAAAGCGCATAAAAAAGCACGACTTCTTTAACAGAAGCCGTGCTTTTTCTTATGTTCATTTTACTTTGACGTTTGCTCCAGGCTGCGCAGCAGGGCAATTTCCTCTTGGTAGCCGGACAAGTCATTGGGGGTCTCTAAGAACATGGGCAGTCCCCGCAGCGCAGGGTGGTTGACGATGCGGCGGAAGGTCTCTATACCCAAAAAGCCTTTACCGATCTGCTCGTGTCGGTCTTTATGGGAACCGCAAGGATTCTTAGAATCGTTCAGGTGCAGTGCCCGCAATCTGTCCAGGCCGATCACCCGGTCAAACTGGGTCAGCACCCCGTCCAGATCCTCTGCCAAAGGGTACCCGCCATCGCTCACATGGCAGGTGTCCAGGCACACGCCAATCTTGTCTTGCAGCTGCACACCGTCTATAATGCGGCGCAACTCCTCAAAGGTGCCGCCCACCTCGCTGCCCTTACCGGCCATCGTCTCCAACAGCACGGTGGTATGCTGCTCCGGGGTCAGCAGGTCGTTCAGCGCCCGGGTGATATAGGCAATCCCGTTATCCGTCCCCTGCCCCACATGGGAACCGGGGTGAAAGTTATACAGCGTACCGGGTAGAGCCTCCAGCCGCTGCAGATCATCGGCAAACACCTCTCTGGCAAAAGTGCGGGTGCGTTCCTTATCGCTGCACATATTCATGGTATAGGGTGCATGAGCCAGCACCGTGCCAAAATCCGCAGCCTGCGCCCCCTGCAAAAAGGCAGCCACATCCGCCGGATCCTGGGCCTTTACGGCACCGCCCCGGGGATTTCGGGTAAAGAACTGAAAAGTATTGGCACCAATGGACTGTGCCTCTCGCAGCATGTGGACATAGCCCTTGCTTGCACTTAAATGTGCGCCTAAAATCAACATCTCTTATCCTCGCAGCAGGGTCGGACGAGCAATGTGCTGCTCCGCCTGACCGGACATAATATACCCCAGCAGATCCGCCACGCAGCCCTGGTTGCAGTGGCAGGCTTCAAACTGGCAAATCTCATGAATGGCCTTAGGCGCCTGGCCGGCACAGGCCGGCAATCCCACGGTCTTGAGCATATCCCAGTCGTTATAATAATCGCCGATGGCCGCCACATGGTTCCGGTCAATGCCCAGCATATCTGCCAGCACCATAATGGCCGTACCCTTGTGGGTGCCCTTTTGCAGCATCTCCATACTCCATGGAGAGGAGGCCATAAAGTTCATACCTGCCGTGTCGCTGCGGTCAATTACATAGCGCAGCCGGTTCATGGTAATGGGGTTGGACCAAAAGATCACCTTCATCCACCCCTCCTTGGGCACCTTATCAATGGAGGTCACCTCGTAGTGCGCCTTATCAATATCCATGGTGCCCTGGGACAGAACGCCGTTTTTGACGATATACACATAATCGTCAAAATAAATTCCCACATCCACACTCTTAAAGCTGTCACTGAACTTATTGATGATGTAGCGCACAAACTCGTGCCCCTCCTGCTGAATGGTGCTGCGCCAAATCATCTTCTCCTGCTGAAAGTCATAAATACCCGCGCCGTTGAGTACCACCGCCGGTTGATTGGGGGTGATACGATCGTAATTGCGCTTCAAGCTGGAGGTCAGCCGCCCGGAAGCCAAGGTAAAGTTGCCCCCCGCCTCTGTAAACGCCTGAATGGCGTCATAATTACGCCGAGGCAGCTTGCGTGCTTTGTTATTCAATGTGCCGTCAATATCTGACACCACCAGCCAATTGCTAAAATCCTTTTGACTCATACGCTCACCTTTTCTTTTCCCTACAAGTGTGCAAAAATGATGTGAAATACGGGGGCAGCGGTGCTTCAAACCGCATTTCCGCCCCGGTTCTGGGATGTATAAAGCCAATCTCCCCAGCATGCAGGCACTGCCCGCCCAGGGAGGTGATCACACGCCGCGGTCCGTACACCGGATCTCCGGCCAGCGGGTGACCGATATAGGCCATGTGCACCCGAATTTGGTGGGTGCGTCCGGTCTCCAATACACAGCGAATATGTGTAAAGTCCCCAAATCGCTCCAACACACGATAATGGGTGGTAGCCGGCTTGCTGTTCTGTTGGGTCACCGCCATTTTTTTGCGATCCTTGGGACTGCGACCGATGGGCTGGCACACCGTGCCGCTGTCTGCAGTCACATTGCCGTACACCACCGCTTGGTACGCCCGGTGAAAACTGTGTTCCTGAATCTGACGTGCCAAATCCACATGGGCAAAGTCATTCTTGGCTACCATGAGCAGACCGCTGGTATCCTTGTCAATCCGATGAACGATCCCCGGTCGGATCACGCCGCCCACACCGCTAAGGGAGTCACCGCAGTAGTACAGCAGCGCGTTCACCAGCGTGCCGGTATAATTCCCCGGTGCCGGGTGCACCACCATACCCTTGGGCTTATTCACCACCAGCAGGTCGCCGTCCTCGTAGACCACATCTAAGGGGATATGCTCCGGCAGCACCTCCATGGGCTTTGGCTCCGGCAGGCGCAGCTCCACCCGGGTGCCCGGGCGCAGTTTGTCTTTTTTATTTCCCGGAGAGCCGTCCAGCAGTACGCCGCCCTCCTCAATCACTCGCGCCGCCGCCGATCGGGTCAGATCCGCACACACGGTGCTTAAAAACTTGTCCAGTCGCTCCCCTGCCGCTGTTTCGTCCACGGTAAAGGCACGCACCGGCTGCCGCTCATTTTCCGTCATGGGTCGTTCCCTTCTTGCCGTCACCGGAGCGGAACAGATCCACTGCCAGCCACAGCACAAAGCTAATGCCGCCGCAGGTCACAGCGCAGTCCGCAATATTAAACACGGCAAACTGCATAAAAGTCGGCTCAATAAAGTCAATCACATAGCCGTACAGCACCCGGTCGATCAGATTGCCCAGACCGCCGGCCACCAGCACCCCCAGGCTCCAGTAGCCCCACAGGGAGCGGCATTTGTTGCGAAACATATAAAAAAGCACACCGGCACACACCAGAGCGGTCAGCGCCACAAACACCCACCGGGCACCGCTGAACAGGCTAAAGGCCATCCCGATATTGCGGGCATAGCGCAACTGCACCGCACCGGGCAGCAAAGTAACAATCTTGCCCCCCATCAGCGCACTTTCCGCCAGTCGCTTGGTCACCTGGTCGAAAGCCACGATCAGCAGGATCATAATGGAGGCCCAAATGTGTTTTTTTCTATGCTTCATAAACCCTCCGTATATAAAAAGGCGGGGGCAGAGCAGTCGCATCTGCCCCCGTATGGGTCGTTCTTTATTTGTTCATCTCTGCCAGTGCAGCCGCACAATGGGCGCACAGGGTGGGATGCTCTGCGTTTTGACCTACGGTCTCATCGTACTTCCAGCAGCGCTCGCACTTTTCGCCGTCTGCCTTAGATACGGACACGCGCAGCCCCTCTACCTCGCCGGTAAAGTCGCCCTCACAGTCGGACAGTGCCACAGCGGAGGTAATGAAGATCTCCGGCAGCTGGCTCTCTACGCTCTGCAAGAAATCGCGCAGTTCGCCCGCAGCATACAGGGTCACCTTGGCCTCCAAGGACTTACCGATGGTCTTGTCCTTACGAGCCAACTCCAGTGCCTTCTGCACATCTTCACGAATCCGATGGATCCGATCCCACTTGGCCATAAAGTCCGCGTCCGCAGCAATGTACTCCGGCTGGGGAATATCGTTAAACAGCGGAGACCGGGGATCTCTGCCCGCTGCATGGGGCATTGCCTTCCAGATCTCGTCACAGGTAAAGGCCAAAATGGGGGTCAGCACCAAGGTCAGTGCGTCCAGCACCTTATACAATACGGTCTGGGCGGCACGGCGGGTAGCGCTGTTCGGCGCAGAAGTGTACAGCCGATCCTTGAGCACATCAAAGTAGAAGTTACTCATATCCACCACGCAGAAGTTGTGCAGCGCGTGGGCGGCGGTGTGGTACTCGTACACCTCGTACCCGCCGCGAGCGGTAGCCAGCACCTGATCCAGCTTCATCAGCGCGTATTTATCCAGCTCTTCCAACTGATCGTTGGGCACCATATCCTTGTCCGGGTCAAAGTCATACAGGTTACCCAGGCAATAACGAGCGGTGTTGCGGATCTTTCTGTAATTATCCGACAGCTGCTTCAAGATCTCCTTACTGATGCGCACATCGGCGTGGTAATCGGAAGAAGCCACCCACAAACGCAGAATATCCGCGCCGTACTGGTTGATAATGTCCGCCGGGTCAATACCGTTACCCAGGGACTTACTCATCTTCTTGCCCTCACCGTCTACGGTCCAGCCGTGGGTGATGATCTGCTTAAAGGGTGCAGGCTGCCCGGCGGCTACGCTGGTGAGCAAAGAGGACTGGAACCAGCCTCTGTACTGGTCGGCACCCTCCAGGTACACATCTGCCGGCCACTTCAAATAAGGGCGCTGTTTAAGCACCGCTACATGGCTGGAGCCGGAGTCGAACCACACATCCATAATGTCGCTTTCTTTTTCAAAGCCCTTTTGTGCGCCGCAGTGGGGGCACTTATAATCCTCCGGCAGGAAATATTCCGCCTCGTGGGCGAACCAGGCGTCAGAGCCTTCCTGACCAAAGATCTTAGATACCCGCAGCATCAGATCTTTATCCACGATCTCCTTGCCGCAGTCTTTACAATAAAATACGGGAATGGGCACACCCCACTTACGCTGACGGGAAATGCACCAATCGGCGCGCTCCTGGATCATGGACTGCATACGGTCCTTGCCCCAGGCCGGATACCACTGCACATCCTCGGTGGCAGCCACAGCAGCCTCCTTAAAATCATCTACCGAGCAGAACCACTGGGAGGTGGCGCGGAAAATGATGGGCTTATGGCAACGCCAGCAATGGGGATACTGGTGGACGATCTTTTTCAGCGCAAACAAAGCGCCGATTTTTTCCAAATGCTCCGCAATGGGCTTGTTGGCCTCATCGGTGGTCAGCCCGGCGAACTGTCCGGCCTCCTCCGTCAGTCTGCCCTCGGCATCCACCGGTACAACGGTGGGGATCTCCGGGTACTTTTGGCACACGATAAAGTCATCCACACCGTGACCCGGTGCCGTGTGTACGCAACCGGTACCGCTCTCCAGCGTTACATGGTCGCCCACGATCACCAAAGAGGTGCGGTCAATAAACGGGTGCTGGGTTTTCATATACTCCAGCTCGCTGCCCTGGATCACACCCACGGTCTCATAGTCCGTGGTGCCACGGTCCGCCATAGCGGCGTCTACCAGGTCAGTAGCCATCACATAAAACTCGTCGCCGCTCTTGACCAGAGAATACTCAAAGTTGGGGCCTACGCAGATGGCCACGTTGGCCGGCAGGGTCCAGGTGGTGGTGGTCCAAATCACGAAATAGGTCTTGCTCAGGTCCGCACCCAGTGCAGTGAGCTTGCCCATATCGTCCGTTACATTGAACTTTACATAAATAGAATGGCAGGGATCCTCGCCGTACTCAATCTCCGCCTCGGCAAGGGCGGTCTTGCAGTCCGGGCACCAATACACAGGCTTTAAGCCCTTGTAGATATGGCCCTGAGAAGCCATGGTAGCAAATACCTTAATCTGCTCTTCCTCAAAGTCCTTGGTCAGGGTGATGTACGGATGGTCCCACTCGCCGATCACGCCCAGGCGCTTAAAGGACTCCCGCTGAATATCCACATAGCTCAGCGCGGTCTCTCGGCAAATTTTGCGCAATTCCAGATCGGAAATGTCGCTGCCGGCGCCGATGCCCGCCTGCTTTCTGGCTTTCAGCTCTGTGGGCAGGCCGTGGGTATCCCAGCCGGGCACATAGGGAGACTGGAATCCGGTCATATTCTTGTAGCGCACAATAAAGTCCTTTAAGGTCTTGTTCATGGCGTGGCCGATATGAATATCACCGTTGGCGTACGGAGGTCCGTCGTGGAGCACAAACAGGGGTTTGCCCTCGTTGTGCTGCATCAGCTGACGGTACTGGTCATTTTCTTCCCATGCTTTCAGGAATTCCGGCTCCCGCTGGGGCAAAGCTGCCCGCATGGGAAAGTCGGTCTTGGGTAAATTCAGTGTTTGGTTATAATCCATGCTTCTTGTTACTCCTACTGTGTATGTAAATTATTTTTTCTTCTTAAAGAAACCGCGCAGTTTGGAAGAGCCCTCTTCCTCCTCGTACTCGTCCTCGTCCGGAGCGGTCAGGGAAATGGTCTCGCTGGTGCGCTCGTCGCCGCTCTTTACATGAAAATAATCCTCAAAGGGCATAGCGGCCTGGTCGTCAAACAAGGTCTTTTCCTCCTGCTGCGGGGGCACCTGCTCCAACTCCGGTTCCTCGTCGATCTCGCTGATGGTGGGGGCGTTCTCGTCCAGCGGAGTGATTTCGTCCTCGGTAAAGGCGTTCAGCGCGCTGCTGACCTCCTCCGGGCTGGCTGCGGGCGCCTGCTTCTCCTCGATCTCGTCAATGATCTGATCCACCTGGTCATCGTCTGTGTCGCCCTTGGTATTCTCTGCCGTCGGCGCCTGTGCCGCAGCTTCCTCCGTCGGCGCGTCGACCGTCTGGCTTTGCAGTTTGTTGATCTCGTCAATATTGGAGATGATCTGGTTCATCTCGCTCTCCACAGAGTCAATGTGCGCCTGATCCTCGTCCACCTGGGGCTTCAGATCCACCATATCGCCCAGGCGATCCATCTGGCTCTCATACAGGGACAGCAAGCTGTCCTTAAAGCTCTTAGACTCGCTGCGCAGCTTTTCGATCAGCTGCTCGTGATAGGCTTTTTCGCTCTTCGCCTTGCTCATCAGTTCCTCAGACAGCTGCTTGGCCTGGTTGAGCATTTCCTGAGCCACAACCTTGGCGCCGTCAATGGCGTCATTGGCCTTGGCCTCCGCCTCGGTAATAATGGACTCGGCAGCGTCCTGCTTCTCCTTGGTAAAGTTGGCGGCGTAGGTGCGGGCCTCGGCCACCATCTTGTCCGCTTTTTCTTTAGCGTCCGTCACCGTCTGCTGCGCGGTGGCTGCGCTGGCGCTAAGCTTCTCCTCCGCCTTTTCCTTGGCGTCCTTGGCAATGCGATCCGCCATCTTTTGGGCGGTGATCAGTGCGGTCTTGATAGAGTCCTCTTCATTTCTGTACTCCTCGATCTTGCCGGCAAGTATTTCCATTTTGCGGTAAAGCTCTTTGTTCTCATCGTACACAGCCTGGTAAGACTCAACGATCTGGGCCAACAGGGCATTGACCTCTTCCTTATCATATCCGCCGCTTTGCACGGTAGACAGATTTTTCTCTCGAATTTGGCTGGGTGTAATCATATTCTCTCTCCTTCTCTCCTCACATAAACATGCCGTTGTTCTCAAGCTCATCGATCAGATCGCCCATTACATCTACATTGTAAGGCGTAATGATATAGGTGCTGTTGGCTACCCGCTTGATCTGGCCGTTGTTGGCATACGCCACGCCGCTGAGGAAATCCAGCAGTCTGCGTGCAATATCTCGGTTGGTGCTCTCCAAATTCAGCACCACCGTACGCTTGGCATTCAAATTGTCGCCGATGGAGGCAGCCTCTTCAAACCGCTCCGGCTTCACCAGCACCACCTGCAACTGGGTGGTGGTGTGGATATTGACCACCTTATCGTCCCGTCCTCTGCTGCGCGGGCGTTCCTGGCGCTCCGGCTTAGGCGCCCGCTCGTGCCGGGGGCGCTCCTGTCGCTCTGCCCGCTCCGGGGCAGCCAGACCGTAGTCCCGGTTGTCATCGTCATAGTAATCGTCAAAATCATCATCATTCTCGGTAATGATCTCTTTGAACTTATCCAGTAAACCCATATTCGCCTCTCCTTAACGGTATTGTCTGGCGCCGAAGATGGCAGAGCCGACACGCACCAGCGTGGAACCCTCGGCAATGGCGGCTTCAAAATCGCCGCTCATACCCATAGACAGAATATCCATGTCTATATTATGGTGTTTTTTGTCTTTAATGTCAATGAAAGATTGATGCATTGTCTCAAAATATTTGCGTACCTGTGTCTCCGTCTCACAAATGGGGGGAATACACATCAAACCCTTGATCTGCAAACCGGGCAACTGGGCCGCTTCTTCCAGCAACTCCGGCAATGCCTCGATCATAATGCCGCTTTTGCTTTCCTCCCGGCCGATGTTCACCTCCACCAGTACCCGGGTGGTCACGCCGTGCTTAACGGACTGCTTGGAAATCTCCTGGGCCAGTTTTATAGAATCCACCGACTGGATCATATCCACCTGACCCACAATATACTTGACCTTATTGGTCTGGAGTCGACCGATCAGGTGTTTTTCCACCCCATCCAAGTGCAACTCGTCCCGCTTGCCCAGGTATTCCTGCACCCGATTCTCGCCGATCAAATCGGCACCCAGATCCAGCGCCCGGTTAATGTACACCGGCTCCACGGTCTTGGTCACTGCCATCAGGCGAACCTCTCGGGGATCGCGGCCGCTTTTGACGGCGCCCTCCTGCACCCGATCTAAGACCCGCTTCCAGTTCTCCTCAACGGCTTGCAGCCGTGCCGGATCAGGTATAAACTTTTCCATTATAAAGATCCTTCCCTTCTGTGATGATCTCGTCATAAAGGCGAATACCGTCTTTATTCTGCGCGTCATACGCCAGTATTACATAATCCTTGCCGGAATACAGCACCGTGGCGGGACGGAATTTCACCTGTCCGGCCACCAGCACATACACGCCCTTTTTACCGTCGCTCACATGCACGGCGGCAGCGGGGGCCTTGATCCCGGTATAGGAAGCTGTGCGAATTTCTATATCCTCCGCCCGATAGGCGGCAATATCCGAGTCCATATTCTCACATTGGAGCACCAGAACCGTTTGCGTGGCGCCGGGCTTGGTGTCCGCGCCGCTGACCACGGTGCAGGAAAGTACCCGGTCGCTGTCCTTAATAGCCACATCCAGTCGAGTGCCGTTTTGCACCTTTTGCAGGTCCGCCACATCCGCCTTGCACACAAAGTACCAAGCATAGCTGGTGATCACCTTGCCTAAGGCGCCGGTATCGCCCTTGGCACTCTCGGCAGTCTTTAAGGCTTTATCCAGATCGGCAGCGGTCATCTCCGTCACCTGATCATAATCAAAAACGCTCTCGCATCCATCCGTGTAGCCGGAGAAAACGCCGCTTACCGCCGTAGTCACGGAGCCAATGGGCTCTGCAGTGCCCAGGTCGTCCATTTGACTTTGCAAATCCTTTTTCAGCGCCGCAAAGTCAATGCTGGTGCCGATCATCATCTGGCGGCGGGTAAAAGTGTCGTTCATCTCCTGCGCCGCGGTACTTGCCCCGGTCAGATCCGATTGGGCCAGTGCCCGTATGTAATCATTTACATTCTGCACCGCCTCATTGTCCACGGCGGTAATATCCGTGGCGGTGGCGGTCCTCTTATTTTCCATATCCCGGTAGTGCTGCAGTTTCTCCTTTAAGGCGGTGCGCTGGCTGTACGCCTTAGCGTCCGCCTCAGACTGAAAGCGCAGAGCCACCTTGCCGTTCTTGGCAATCTTCTCGCCGTCGGCAACGCATTGCACCGTCACGCCGCCGGGGCCGCTAACCGCGTGCTCCTCTCGCACCGCCAGTGCCGTGGTCTCAATGGTACGGTACACAGTGGTCTCCTTGGCGGTGTAGGTTTGCAGCCGCACATGGGTAGCAGTATAGCACTCATACACCACCACAGACAAAATCAGCAGCGCCACAATGCCGATGGCCCAGTTCTCCTTGGCGGTGCGACTGAGCTTTTTACGGCTTTTATGCTCTTTTTCCTTTGTCTTTGCCATAAAGAAAATCCTCTGCCTGCGCCGTCGCTGCGGCGATCAGGCGCTCTGTATCCATGGTATCCGGCTCCAGCACCACAGTGCCCTGCCGGCGCTTAAACCAAGTGATCTGGCGCTTGGCGTAGCGGCGGGTCTCCTGCTTGAGCCGTTCTACCGCCGTCTCCAGCGGCTCGCTGCCCTCCAAATACGGCAGCAGCTCCTTGTGCCCAATGGCCTGCCGTGCCGTAGGACCGCAAGCGGCGTAGGCCTGCCGTGCTTCCTCCACCAATCCGGCGGCCAGCATGGCGTCCACCCGGGCATTGATCCGATCATACAGCACCTGCCGATCCCGGTAACAGAGCACAAAATACAGTGCCTCATAAGGGCTGTCCTCCCTGCGGGAGGCTGCATTCTGGGCCGTTTTGGTCACACCGGCATAGTACAGCTCCAGTGCACGCACCACCCGGTTTTTGTTATTCGGATGTATTTCTGCCGCAGCCGTGGGATCCACCTGCTGCAAGGTACGGTACAACTCTGTGCCATCCTTTGCCAGCAGCTCCCGGCGCAGGTCCGGGTTCGTCTGCACATGGGCAAACTGAATGTGGTCAATAAAGCTGTCAATAAACAGCCCGGTGCCGCCAACCAAAATGGGCACCTTACCCCGGGCGGCAATATCCGCCACCGTCTCCGCTGCCAGCTTGCAATACTGAGCCACGCTAAAAGGGGTGTCCGGGGGCAGAATCTCTGCCAAATGGTGCACCGCTGCCTGCCGCTCCGCTGCCGTAGGCGCCGCAGTGGCAATGGGCATACCGGTATAGATCTGCATAGAGTCGGCACACACAATCTCGCCGTCCAGCCGCCGCGCCAGGGCAATGCCCAAACCGGTTTTGCCGGAGGCGGTGGGGCCGGCCACCACAAGTACCTTTGTCTTCATACTCATGCCCTGCCGAACTGTCTTTCAATCTCGTACCGGCTAACCTTGATCATCACCGGCCGCCCATGGGGGCAGTAGCGAATATCCGGCATGGACAGCAGTTTCTCAACAAACAGGCGCTGCTCCGCCGGGCTGGTCACATCACCGGCCTTGACCGCTGCGCGGCAAGCGGTGGAATGGAAAATCCAGTCCAGCTTTTCCGGCTCAATGTCCGTTTTGTGCTCCAGCAGCTTCTCTGCGATCTCGCAGATCAGGTCGGCAATATTTGCCCCGTCCAGCATAGCGGGCACCGATCGCACCAACACCGCATCCGTGCCAAAGATCTCCACCTCAAAGCCGCCTTTTTGCAGCAGATCCAGATGTTCCTCCACGGCGGACAACTCCGCTTTGTTCAGACGCACGGTCACCGGCGCCAGCAGCAGCTGGCTGTGGATCTCCGCGCTCCGGCGCAGGGCTTCAAAATTCATCCGCTCGTGGGCGGCGTGCTTGTCAATATAATATAAATTATTTTCTATCTCTACAAGTATATAGGTCTTAAAGGCTTCGCCCACTACACGGAAAGCCGGGGTCTTCCGGTCCTCGTCCACCACCTGCACCGTGGGGGCAGGTGCTGTCTCCGTCGAAGGCGGTGCAGACGCTGCCGACTCTGCGCTCTCATGCGTAGGTACTGCCGGGGGCGCTTGGACGGGCACTTCCTGCTCACGCTGTACCACCGGCGCAGCCTGGGGTTCCGAGGCGTTTGTTTCGGTCACTTTTACAGGTGCCGGCTCTTGCGCCGTCGGCGCTGTGCTTTGCTCTGCCGCCCGCTGCACCGGGATCTGCTCCTGGGGCGCGGTACGGTACGGCACACCTGCCTGCGCCGTCTGCCAAAAGTCCGTGCGGGGCGCTGTTTGCAGCACCGTTTGCACGCTCTCTTCCTTTTTGCGGAAGAAGTCGATCTTGGCGCTGTGACTGCCTGCCGGCGGGTACGCGCGTCCCACCTCGTCCGCTGCGGGGGTGCCGCCAAAGGTTGCTTCCTTTACACTGTCGCCGGTCTCAATCGCGGTCTTGACCCCATAATACACCAGGTCAAACACCGGCTTTTCGTTGGCAAAGCGCACCTCGATCTTGGCCGGGTGCACATTCACATCCACCAGCGCCGCGTTGACGGTCATATTCAGCACGCAGGCGGGAAAGCGCCCCACCATAATGCTGTTTTTATACGCCTGCTCCAGCGCCGCCAAGGCGGTCTTAGACTTCACCAGGCGACCGTTTATGAAAAAATACTGCATGGCCCGGCTTTTGCGGGAGGCATGGGGGCTGGACACATAGCCCTCCAGCTCCATACCGTTATAGCTGTAATGCACCGGGATCAGCGACTGGGTCAGTTCCCGGCCAAACACGGAGTACACCGTGCTCTTTAAGTCCTTGTTGCCGGGAGTCACCATGGTCTGCTTGCCGTCCCGGATCAGGCGAAAGGCGATCTCCGGGTGGCTCAGCGCCACCGCGTCCAGCACACCGGCCACCGCGTTGCCCTCGGTCACATCTTTCTTTAAGAATTTCATGCGCGCAGGCGTGTTAAAGAACAGGTCCCGCACCACCACTGTGGTGCCCACCGGGCAACCGGCGTCGTCGCAGCTTTGTTCCTGGCCGCCGGCGATCACATAGCGGGTGCCCACCTGCTCCTCTGCTGTGCGGGTGAGCAGTTCCACCTGCGCCACTGCTCCGATGGACGCCATGGCCTCGCCCCGAAAGCCCAGGGTGCCGATGGCGTTCAAGTCCTCCTCGGTTGCGATCTTGGAGGTGGCATGGCTGATAAACACCTTGGGCACATCCGCCCTTGCGATGCCACAGCCGTCGTCCGTAATGCGCATATAGGTAGAGCCGCCATGCTGGATCTCCACCGTTATGCGGGTGGCGCCGGCATCAATGGAATTCTCCACCATTTCCTTAATTGCAGAGGCGGGGCGTTCCACCACCTCGCCGGCTGCAATCAGCTGGTACACGGACTTGGGTAAAATATGAATTTGCGGCATGGAACCACCGCCCTTTCTATAATGAAATCCGTTTTTAGCTAAGCTCCTGGGCCTTTTTGCGCAGGTTATCCAGGGTCTGCATAGCCTCAATCGGAGTCAAAGTGTTAATGTCTACGGTCTTTAGAATTTCCAAGATTTCGTTGGTGCCGTTGGCGGTGAAATTGTACTGAATTTCCTCCTCCGGCTCCTCCTCTATGGCTTCCTCCGCCTTAAACTCGATGGGCACGCTGTTCTGCTCCAGTTCCTTGAGGATCACCTTGGCGCGGCGCACCACCTTGTCCGGCACACCGGCCAGCTTGGCCACTTCAATACCAAAGCTCTGGTCCGCGCCGCCCCGCACGATCCGCCGCAGGAAAGTAATATCGTCTCCCCGCTTCTTCACCGCTACGGAGTAGTTGCGCACACCGTCTACCAGCCCCTCCATGGCGGTCAGCTCATGGTAATGGGTGGCAAACAGCGTCTTGGCGCCCAGAGTCTTGCGCTTGCACACATATTCCAGCACCGCCCGGGCAATGCTCATACCGTCAAAGGTAGAGGTGCCCCGGCCGATCTCGTCTAAGATAATCAGGCTGTTTTGGGTGGCGTCTTTCAAAATGGTGGCCACCTCGTTCATCTCCACCATAAAGGTGGACTGGCCGGTAGCCAGGTCGTCAGATGCGCCCACTCGAGTAAAGATGGCGTCTACCACGCCAATGTGCGCCTGCCGCGCCGGTACAAAGGAACCGATCTGCGCCAACAAGGTGATCAGCGCAATCTGGCGCATATAGGTGGACTTACCTGCCATATTGGGGCCGGTGATAATGTGGCACCGGTCGTCCTGCAAGTCCAGGTATGTATCGTTGGGAACAAAGGGCCCGCTGTCCAGCAGCGCCTCCACCACCGGGTGACGGCCGTCCTTGATCTCGATCACGCCATCCCCTTCTACCTGGGGACAGGTGTAGTTATGTTCTGCCGCCACATGGGCCAGGGAACACAGCACATCCAGCCGGGCCAGCGCCTTGGCGGTCACTTGCAGCCGCTGGATCTGACCGGCGATCTCCTCTCGCAGAGCACAAAACAGCTGGTACTCCAGCGCCACCTCCCGATCCTTGGCGCCTAAAATCTTGCCCTCCAGCTCTTTCAGCTCCTGGGTTATATAGCGCTCACAGTTGGCTAAGGTCTGCTTGCGGATGTAAGTCTCCGGCACCTGATCCCGGTATGCATTGGACACCTCAATATAGTAACCGAATACCCGGTTGTAGCCCACTTTCAGCTTGGGGATACCGGTTTCTTCCCGCTGCTGCGCTTCAATGGAGGCAATCACGCCGGTGCCGTCGGTCATAATGGCCTTTAGGCTGTCGATCTCTTCGTTATAGCCTGCTCTGATAAACCCGCCTTCGCGGATAGAAAAGGGCGGCTCCTCCACAATTGCCCGGCGAATTTCCTCTGCCACATCGGTGAGCAGGTCAATATCGCTTTCAATTTCCCGCAGCATGGCGGTGTTGCAGTCTGCCAAAGCAGTCTTAATCTCCGGCAGGGCGGAAATGGTGCTCTCCAGCGCCCGCAATTCCTTGGCATTGGCCGTGCCGTACACAATGCGGGTCATCAGCCGCTCAATGTCGTTAACACCCACCAGCGCCTGGCGTACCGTGTCTCGCAGCATAGGGCAGTCAAACAATTCGCCCACCGCATTTTGGCGACGGAGGATTTGGCTGACGCTCAGCAGCGGCCGCTCCACCCAGGCACGAATCATCCGCTTGCCCATGGCAGTCTTGGTCTTATCGATCACCCACAGCAGCGAATGCTTCTTGTCGCCGGTCATCATGGAGCGGGTCAGCTCCAAGTTGCGCCGGGCGCTGATGTCCAGGTGCATAAACCGCTCGCTGTCGTAGAACTCCACTTCCGATGGGGTCTCGATCTCGTCTTTCTTCTGCGTATTCTTCAAATAAGCGATCACCGCGCCCAGGGCACACACCGTCTCGCGGCTGTGACCCAGGTCCAGTGCAGCGATCTCATCCTTCTTTAAGGTCTCTATAATTTCCTGGGAGCAGGCGTCAAAATCGAACAGCGCCGCCTCCGGGTACTCGGCGGACGCCTCCAGCCGAGCAGTCACGAACTGCACCACATGGCCATAATCGGCAGCGGTGCCGCCAAAAATCACCTCTTTGGGAGAATAGGTGGACAGCTGATTGATCACCTTGCTCTCCACATCCTCGCCGGTAGCCAGAGTCACATGGAACTCGCCGGTTGACACATCCGCAAAGCAAAGCCCGGCGCCGTTCTCGCTGCCAAACACACTGCACAGGTAGTTGTTGACGCCGTCCTCCAGCATATTGCCCTCGATTACCGTACCGGGGGTGATGATTCTTATAACCTCTCTTTTAACGATGCCCTTGGCCAGCGCCGGATCCTCCATCTGCTCACAGATGGCCACCTTGTAGCCCCGGCTCACCAGCTTGGCGATATAGCTGTCTGCGCTGTGAAAGGGCACACCGCACATAGGTGCCCGCTCCGCCTGGCCGCAGTCCCGACCGGTGAGCACCAGATCCAGCTCCTTGCTGGCGATCTTGGCATCATCAAAAAACATTTCATAAAAATCGCCCAGACGGAAGAACAAAATCACATCCGCATAGTCCTTCTTGATCTGAAAATACTGATCCATCATAGGGCTGATCTTTGCCTTTGCCATATTCCACTCGTCCTCCTCTCTGCAAAAATGCTGCGAGCGACCACGCCGCCCGCAGCCGGTTTACACCTTAGTGGCAGCCGCCGCAGGTGCAGCAATCGTGGGTGCAGCCACCCTCCTGCTGCTGGGGCAGCTCACAGGTCTCCGGGTCCTGACCGTCAAAGAACAGGCCCATCATACCGCTGATGTACTGTGCCATCTCCTCCATGGCGGAAGCAGCGGCAGAATACTTCTGCATATTTTCGCTCTCCATAATCTCACCATAGAGCTTCTGATAATCGGCCTGCAGGCTCTCAATGCGATCTTTGTCTGCATCGTTTGCCTTCTCGGCCTCCTGCTGATACTTCAGGGAGATCAGCTGCAGCTCCTGCATCTGCTGCTGCAGCTTCTCGTCGCCGTCATTGGCCTTAGCTGCGGCCTGGAGGGCTGCAAAGCGCTCGTCCTTTTGAATTTCTTTGCCCAGTTCTCTGAGTGCGGATTCCAAACTCATAAATTTAATTCCTTTCCAGTTCTCCCCGCAACACATAGGTGAGCGGTTCTATAACTTTTACATTTTGGAAGGAGCCGATCAGGCTGTCGTCCCCTTCAAATTCTATAATCAGGTTCCCGTCCGTGCGGGCGGCAACATAATTATCGCCTAATTTGCCTTTGCCGCTGACAAAGCACTTAAAAGTCTCGCCCCGGTGCAACTGCATTTGCTCTGCGGAGATCTGCTCTTGCAGCGCCAGCAGCTCCGTCATCCAGCGGGCTTTTTCCTTATGGGATACCGGATCGTCCATCTTGGCCGCCGGGGTGCCCTCTCTGGGCGAGTAGATGAAAGTAAAGAGTGAGGTGGCCCCCACCTCTTTGACCAACGATAAAGTATCTTGAAACTCCTCATAAGTCTCGCCCGGGAAGCCCACGATCACATCGCTGGTGATGGAAAGGGCGCTGCCCATCTTGGCCTTAGCGTAGTGCACCAGCTCTAAATACTGCCGGGCGGTGTAGCCCCGGTTCATGGCTTTCAGCACCCGGTCATTGCCGCACTGGAAGGGCAGGTGCAGGTGCTTGGCTACCTTTGGACATTCGGCCATGGTGTCCAGCAGTTCTTTGGTACAGTCCTTGGGATGGCTGGTCATAAAGCGAATGCGAAAATCGCCGGGCAGGTCGTTCATCTGCCGCAGCAGTTGGGAAAAGGTAACTCGTGGGGTCAAATCTTTGCCGTAGCTGTTCACATTCTGCCCCAGGAGCGTAATCTCTTTATATCCGTCGGCAATCAGCTGCTTGGCCTCTGCCAGCACATCGCACGCCTGTCGGGAGCGCTCCCGCCCCCGCACATACGGCACGATGCAGTAAGTGCAAAAGTTGTTGCAGCCGTACATAATGGGCAGCCACGCCCGCCGCTGATCGTCCCGCACTACCGGCACACCCTCGGCAATCACGCCGTCCATATCCGGCAGTTCAAACACCCGCTTTTTGCGGGTTAGGGTGCGCAGCAGCAGCTCCGGCAGCCGGTGCACCACATGGGTGCCGAACACCAGGTCCACAAAAGGAAAGGACTTCTTGATGCGCTCGGCAATGTGCTGTTGCTGCATCATACAGCCGCACAGGGCGATCACCGTGTCCGGGTGCTCCGCCTTATAGGACTTGAGCGCCCCCACATTGCCAAACACTCGATCCTCTGCATGCTCCCGCACGGCGCAGGTGTTAAAGAGAATAAACTGTGCTTTGTGCCGATCGTCGGTAAACGCGTAGCCCATATCCGCCAGCATACCCTTAATATGTTCGCTGTCCGCCACATTCTGTTGGCAGCCGTAGGTGATCACACAGGCCAGAGGCTTGTCCGTATAGCGGCTTTGCAGCACCGCCTGCACCTTGGCAGCGTTCTCTCTTTGGGCGTCCAGTTCTTCTTTGCTGATGGTCTTGGTATTGATCAAGGGTACTTCCTCCGACATTGGCTTACAAAAGCCCATTTCAGGCTCCTGCACATTATAGCATTATAACAAATTCCGCGCCACGGTTCAATATATATAATATATAATATTTATTAAAAATAAGTGAATTTTTGTTCACCTTGCACCCTGCCATTGCTTTTGACGGCAAAAAGTGGTAAAATCCATACTTGCGTGCCGTGGATCGGCACGGAAAGAAGCAATTTGACGAGGTGATCTTATGCTGCACCAGCGCGGCGCCGGTGTGCTTATGCACATCAGCTCCCTGCCCTCCCCTTATGGGATCGGCGTGTTTGACCGGCACGCCCGAGACTTTATCGACCGTATTGCGGACATGGGCTTTACCTACTGGCAGGTGCTGCCCTTTAATCCGATTGACGGAGCCGGAAGCCCCTATTGCTCCCCCTCCGCTTTTGCCGGCAACCACCTGTTTATCGACCCGCAGGGATTGCAGGATATGGGTCTGGCGACGGCGGAAGAAGTGGCGGCAAACCACTATGACGGCACGCCGTACACGGCGGACTTTGCCTTTGCCGGTGAACGCCGACTGGCGCTGCTGGAGCAGGCTTTTTTGCGCATAGACGATACCCTGGCGGCCAAGATCAAAGCCTTTGAGGTGGAGAACCCATGGCTGACGGATTACAGCGTATTTATGGCGGTAAAAGAGGCGGAGGGCGGCAAGCCCTGGTGGCAGTGGAGCGACCGCCACGCCCATTACCACACCTGTATTCAGGACATATATTTCTATGAGAGCCGAGCGGCGTTTTGGAAATTTGTGCAGTACATTTTCTACCTGCAATGGGGTAATATCAAGGCCTACGCCAATGAAAAAGGCGTGGCTGTCTTGGGAGATATGCCCATTTATGTAGCCATGGACAGTGCCGATGTGTGGTCCGGTCTGCCCCTGTTTCTCATTGATGAAAAGACCTTAAAGCCGGAGAAAGTGGCCGGTGTGCCGCCGGATTACTTTAGCGAGAACGGCCAGCTGTGGGGCAATCCCCTGTACGACTGGGCGGCTATGGAAAAGGACGGCTACGGCTGGTGGCTTTCTCGCCTGGGTCACGCGCTGACCACCTATGACGCGGTACGCATTGACCACTTCCGCGCCTTTGCCAGCTACTGGGCGGTGGACGCCCAGGCAGAGACTGCCAAGGTGGGCCAGTGGCTGCCCGGACCGGGGATGAAGCTGTTTGACAAGATATTTGAGGTGTACCCGAACGCCCCCATTATTGCCGAAGACCTGGGGGTGTTTGGAGAGGATGTGGTGCAGCTGCTTGCTGACACCGGCTTCCCCGGTATGAAAGTGGTACAGTTTGGCTTTGACCCCAACGGCGACAGCAGCCACATGCCCCATAACGCAGAGAAAAACAGCATCAATTATGTGGGCACGCACGACAACAACACCCTGCTGGGCTGGCTGTGGGAGGCCGGTGAAGCAGAGCGCCGCTTTGCCCTGGACTATGCGGGCTTTACCGGCGACAACTGGGGCGACGGCGGCTACCAAAGTCCCGCCTGCCGCAAAATTATAGAAACGGTGTGGCGCAGCGCCTCCAATGTGGTGATCATCGCCTTGCAGGATATGTGCGGCTTTGGCAGCGACGCGCGAATGAACACCCCCGGCGTGCCGGAGAAGAACTGGCGCTTTCGCACTACAAAAGACACCATCGCCAACATAGACGGCGCCTATTTCCGCCGAATCAACAGCCTGTTCCGCCGCACCTACCCGGTTTTTGAAAAATAACAGGGTCAAAAAAACATCTCCTTCATAGTATGTTACTGAAGCACTGCGGGGCGCCGGGCGCCCGGTGTGCAATAACCTATGAAGGAGTTTTGTTATGCCCGATTCAATCATTGATACCGGCGAAAAACGCATTAACGAGGCGGTGTGCATTGACACCAAGCGCATTTACGACAGCTGCGTAAGCAAGGACTGTCTGGAGGACCTGCGGGTCACCTTTTATGCCCCGGCGCAAATGCTGGTAGACAACGCGGTCACCGTCAAGTGCCGGGACTGCACCATTGAGGCTGTAAGCATTGATGTGGACGAAGTGCCCTTTGACAACGGCTTTTACAGCGTGGATGTTACTTACTACTTTAAGCTGACCTTTGACTGCTACTCGGCGCCCTGCACGGTGCCTATGGTAGCCACCGGCTACACCAGCTTTAACAAAAAGTGCATTCTCTACGGCAGCAGCGGCAATGTGAAGGTCTTTGTCAGCAATGTGTCCGCAGAGGCGCTGGACTGCCCGGAGGCCCCCCAGTACACCAACCCCTCTGCCAAGGTGCAGGCGGTGGATCCGGTGATTCTGTCTATGGATGTGGTATGCAGCTGCGACTGCCGCGTGCCCTGCCTAACCTCCATGCCCAAGTCCATTACTTCCACCCTGGACAACAGCACCCTGCCGGAGCGCCCGGCCAAGGCTGTGCTGGTGACCCTGGGTCTCTTTTCCATCATCCAAATGGAGCGAGATGTGCAGATGACAATTCCTGCCTATGACTACTGCATTCCGGAGCGGGAGTGCAACTGCAACACCGCCAACCCCTGCGAGACCTTCGCCGGCATTGACTTTCCGGTGGATGAGTTCTTCCCCAGGGACAAAGAGGACTGCTGCCCTTGCTGCCCGGACAGCGGCAACACCGGCACCCATACCGCCGACAACCGTAACAATCGCTAAGATCCAAAAAGCACCGCTGACGGTCCCCCGCCGGCGGTGTTTTTTTCGTATTTTCATTGTTTGTCAACCAAGAAGTTCGCCCGGTCTTGATACTTGCCGTTTTTGAATGTAATTTCGTAACTCACCCGATTCGACCGCAGGCGCCATTCCAAGACGGTCACGGTATCGCCGTTCTTGCTCGGTTCCACACCATAATAGCTGACTGTAGACAGCGGCGCGATTTTCAAACATTCTTCCAGGGTCAGATCCGGCGCCCGGTCATACAGACTATCGGCCTGATCCATAGACAAAGGACAGTCGCATTCCGTATTCACCAGGCACTTGCGCTCGTATATACCGTCCTGATCCGTATCTTCCAGAATCACATGGTACGGCATGCCCTCGTAAACGGTCTCTTCATTTGCAGCCAAGCCCGCCTCGTAATCCGCCGGTGTATTTTTAGACTGCACCGGCAGTTGGGTTTTGTCCAAAACTTCCATGGCCTGCTGTAAGGGTTCGGACTCCACACCTTGGCGGGCTCGTTCCCGCATAAGGGCGTCTACGCCGTTAGACACGCTCAACGACACCGCCGCACAAACAATCAGTACCACTAAAATGCGCCCGATCACCGGCATACGGCGGAAAATACCCTGCTCCAGTGTTTGGCTGTTGACCCGATGGATTTTGCCGGCACAGATAAAATCCACCACGGCCAGTACCAACGGCAGAAAAGACAAAACAAGTTGCACATTGTACACCCAGTCCATATTCCAGCCCTTCCACTGGGAGAAATATTGCCAAGGCGACACACCCTCAAGTGCAAAGTCCAACAAAAACGGCGTGTCCATAGCCAAAGCAGCCGGTATATCCAAAGTCAGACAAAACAGTAGGGTAAACAAATCGTACCATAGCAAATACTGCGTAATGCCACTGATAACGCAAAACAGACCGTGCCCGACCAGCAGCACCGGATCCTTGCACTTCCACGCCCAGCGAAAGGCCAGGGTGGTGGCTGCCAAAACAGCCAGCACATTGCCAAACAGCAAGGTATAAACCAGCCAGTCCGGCATAATATGATACAAGAAATCCGACCACTGATCGCTAAACCCATACAGCACAGACAGCAACACGCACGCCGCCAGGGCGGAAAAGCCCAGTACACGACCGGGCAAATTCCGGTGCAGGCGGCCCAGTTCCCGAGCCATCTCCTCCGGCGCGCCCATACGGCTCATCGCCATATTCTCCGCCTTTTCCCTCTCATGTCCGGCGTCTGTATAGAAGCTGATTTCGTCCTCTATATGATCCTCCAACTCCCGCTGTACCTGGGCTTTGGTATACGGGTTGGAGACCAGCAGCAGCGCCTTATGGATATACTCTTCTTTTTTCATGCCCCACCTCTATGCAAACTCCAACACCCGGGTCACATCCCGCGTATAAGACAAAAACTCCGCTTTCTTTTCGGCGAACTGGCGGCGTCCTTTGTCCGTCAAGTGATAATACTTACGACGACGACCGTCCACCGTGCGCCAATCGCTCTTTAGGCACCCCTCCTGCTCCAAAGCGTGGAGAATGGGATACAAAGTCCCCTCGCTCATTTGAAACACATTTTCGCTGCGAACCTCCAACTCCCGAATAATCCGATAGCCGTACAAATCCTTTCCGTCCAACACGCTCATCACCAATAGCGGCGTGCCGCCCTTGAGCAGCTCTTTACTGTAACGCATACGCACCTCCTAAAATCAATACCTTGGATTACAATGTATATCTCACAGATACATCGTAACACAAGGTATTGCTTTGGTCAACAAAAAAAATACCACCCTGTAAAAGAGTGGTATTTTTACGGTGGGGGCAAGCCCCGGCCTGCGATCTTTTGCCTCTAATCGTCTTTACACCTTTTCCATTCGGGCGAAGTTGGCCATCAATTTCTTGGTGCCCGCACGGTCAAAGGCCACCTCCAAAAGGGTATCGTTGCCCATGGGCTGGGTGGACAGCACCACGCCGGTGCCAAAGGTCTTGTGGCGCACCGTATCGCCTACGGCGTAAGTCACGCCGGTAGATGCCGGAGCGGCCTTGGCGGTCTTGGCGCCGCCGAACTTGTGGGCGTAGCTGCTCTTTTGGGTCTGCTGTCCCACCTTGGCGCCGGTAAAGCCTGCGTGGCTGCGGAAGGACTGAACGGTCACATCCTCCGTCACCTGCTCCGGGATCTCCCGCAAAAAGCGGGAGGGCATATTCCGGTTGGTGGTGCCGTAAAGCATACGCTGGCGGGCGTTGACCAAATAGAGCTTTTCCCGGGCGCGGGTAATGCCCACATAGGCCAGGCGGCGCTCCTCCTCCAGCTCCTCCTCGCTGTACATGGCCTGGCTGCCGGGGAAGATACCTTCCTCCATACCGGGGATAAACACCACTGGGAATTCCAGGCCCTTGGCGGAGTGCAGGGTCATCAGCACCACAGAGTCTTCATCGTCGTTATAGGAGTCAATGTCGGACACCAGCGCCACATCCTCCAAAAAGTCGGACAGCTCAAAGTCCTCGTTCTCCTCCTGGTATTTAATGAACATGGAGGAAAGCTCCTTGATATTGTTCAGCCGATCCTCGTACTTCTCCGGGTCGTCCTCCTGGAGATAGTCCGTGTACTTGGTCTTTTCCAAAATCTCCTGGAGCAAGTCGCTCAGGAGCATACCGTCCTCCAGGCAACGCTGGAAGTATGTAATCTGGGCGGCAAAATCCCTTAATTTTTGAGCACTGCGGGCAGTCTTTTGGAACTCGTCTGCTCGCTGGCACACCTCAAAAGCAGAGATGCCCAGCCCGGTGGCGATCTCCGTAATATGGCTAACCATGGTGGCGCCGATCCCCCGTTTAGGCACATTGATAATGCGCTGCAAGCGCACCGTGTCCGCCGGGTTGTTAATGAGCGCAAAATAGGCGGTCATATCCTTAATTTCCTTGCGGTCAAAGAAGCGGTTGCCGCCAATGACCTTGTGGGGAATACCGCTTTTCGTCAGGGCAATTTCAATGTTCCGGGACTGGGCGTTCATTCTGTACAGGACTGCGTGGTCGCTCATTTTGCGCCCGGCCTTTACATTCTTCAGAATCTCCTCCACAATAAAAGAGGACTCGTCCGCCTCGTTCTGGGCAGTATTCAGAATGATCTTACTGCCGGCGCCTGCATCCGTCCACAGGCGCTTGCCCTTTCGATTTTTGTTATTGGCGATCACCGCGTTGGCGCCGTCCAAAATATTCTGGGTTGAGCGGTAGTTTTGCTCCAGGCGAATCACTGTGGCGTTCTTATAATGCTGCTCAAAGGACAAAATATTCTCAATGGTGGCGCCACGGAAGCGGTAAATGGACTGGTCGTCATCACCGACCACGCAAATGTTCTTAAACTTGTCCGCCAGCAGCGAGGTGAGCACATACTGGGCGTGGTTGGTGTCCTGGTACTCGTCCACCATCACATAGCGGAACTGGTTTTGGTACAGCTCCAGCACATCGTCATTCTCTCGCAACAGCTGCACAGTGTTGTAGATCATATCGTCAAAGTCCATAGCGTCCGCCGCCAGTAACTCCTTTTGATAGAGCGCATAGCACTCGGCGATCTTGCCCTTACGGAAGTCCGCACCCACGGTAGCCCGGTACTCCTGGGGGCCGATCAGCGCGTCCTTGGCGTTGCTGATCTCCGACAAAATGGCCCTGTGGTTCAGAAACTTGTCGTCAATGCCCAGCTGGCGCTGGCACTGCTTCATCACCCGCTTGCTGTCGTCCGTGTCATAAATGGTAAAGTGGTTGGTATAGCCCAGCCGATCCCCAAACCGGCGCAAGATCCGCGCGCAGCAGGAGTGGAAGGTGTGGGCCCAAATGGACTCCGCCTCCGGGCCGATGGCGTCTGCCAGTCGCTGGCGGATCTCCCCCGCCGCCTTATTGGTAAAGGTAATGGCCAGCACCTGCCAAGGCAGGGCGTAGCCGTCGGCAATAATATGCTGCACCCGGTTAACCAGCACGGTGGTCTTGCCGCTGCCGGCCCCGGCCAGGATCAGCAAGGGACCCTCGGTGTGCTGCACCGCCTGCTGCTGCATTTGGTTAAGTGCCATTGGTGTTCCTCCGTCTACAAAAAAATTACAAACAAAAAGGGCGCAAAATCCGGCAGGCTAGGCCCGCCGGATTTATCACCCAAAAATCAGTTGTTCCAGTTACTTTAACAAAGTGAGCATAATGCCAGCTGCTACGGCAGAGCCGATCACGCCGGACACATTGGGTCCCATGGCGTGCATCAGCAGGAAGTTGGAGGGGTTCTCTCTCTGCCCCTCTTTTTGGCTGACGCGGGCGGCCATTGGCACGGCAGACACACCGGCAGAGCCGATCAGCGGATTGACCTTACCCTTGGTGAAGATATACATCAGCTTGCCGAAGAGCACGCCGCCGGCAGTACCCACGGAGAATGCGATCAGGCCCAGCAGCACGATCTTCAGGGTATCCAGGTTCAAGAATTTATCCGCAGAAGTGGTGGCACCTACGGACAGACCCAGCAGAATGGTCACAATGTTCATCAGCTCATTCTGTGCCGCCTTGGCGATACGCTCGGTCTGGCCGCTCTCTTTCAGCAGGTTACCGAACATGAGCATACCCACCAGTGCAGCCGCATCCGGCAGCAGCAACGATACAATGACCGTTACCAAAATGGGGAACAAAATCTTCTCCAGCTTGGAAACAGGGCGCAGGTTGCCCATCACCACGCTGCGCTCTTTCTTGGTCGTCAGCGCGCGCATAATGGGGGGCTGAATGATGGGCACCAAGGCCATATAGGAGTACGCCGCCACAGCAATCGTACCCAACAATTCCGGTGCCAACTGGGAAGTAACGAAAATGGCCGTAGGACCGTCCGCACCGCCGATAATACCGATAGAACCGGCCTGCTGGGGGGTAAAACCAAGCAGAATGGCACCCACATAGGTAAAGAAGATACCCAACTGGGCAGCAGCGCCCAGAATAAAGCTGGAGGGATTGGCGATCAGCGGCGCAAAGTCCGTCATGGCGCCAATGCCCATAAAGATCAGGGGCGGGTAAACACCGGCTTTTACGCCGAAATACAGGAAGTCGATCAGACCGGGGCTAAGCACGGCGCCAGAAGCGTCCGTCAACCGGCCGGCCATCAGGTCGATAAACTCATGAATACTGGAGTAATGCACGGCCAGGTTGGCGCTGGGAATATTGGCCAGCAGCATACCGAAGGCAATGGGGATCATCAGCAGCGGCTCAAAGCCCTTCTTGATACCCAAATACAGGAAAACAAAAGCAACCACCAGCATGACAGCGTTTTTCCAGCCGCCGTCCGCTGTGAAGAAATAGGCGTAACCGGAGTTGGAAAAGATCTGTACAATGACCTCCCAAACTCCTCTTAAAATCTCACTCATTCATATACCTCCGTTAAAACGGGCGTGTGTTCTCTGCCACAGCGGCAGCCGCCCAAGGATTGCGCACACCCACCGGATTGGGGCACACACGGCGCACGCTCTGTACCACAGCACCGGGGCCTTCGCTGGCCGCAACGGCAGCTGCAATCACAGCCACTACCTCGCCGGGAATGCCACTCTCCACCACCGGAGCAGGTGCGGCAGGCGCAGCCTTGACAGCGGGTGCAGACGGCGCGGAAGCCACAGTCACCTGGCTCTCCATAGCCTTTAACTTTTTCTTCTTACCACGAGTCTCCGCCCCGTGCACAATGGCGCCGAATGCCTTAAACACAAAGATCAGCAGCACCAAAATGCCCAAAACAATCACAATGCCGGCAATCACGACGGTGCTTGTAAAGGTAGCACTTCTGTCTGCTACGATACCGGTAGCCGCCAGCAAAATTGAAGATAACGGGTTCATCTGATTAACCTCCAGTTACAATTTTCCAAATTAAAGATATTATAAATCAAAAGCGGCGCAAAAGCAATGTTTTTTGCAGCAGAAAGAAAAAAATTGCAAAACTTCGTCAAACTGTATAAAATCCGTTGGAAAGTCTTGATTTATTTTTAAGATCGGATATAATGATAGTGTACCAAAAGGAGGCGGACTTATGACTGAACAGACCTTGATCATTGCCATCTTGGTGGCGCTGGTGATCCTGTGGATCACAGAGACTTTAGGCATGCACCGCACCAGCCGCATTTTAGGCGGCGTTATTGACCTGGGCTTTGCCGTGCTGCGCTAAGTAAACAAAAGGAAATACATAGACCTACCAAAACAGCCGCTGCTTATCGCAGCGGCTGTTTTTTTCTGTTATTCTTTTATGCGGCAAATGCGCATGGCATGCTTCTCCACCTTAAAACGCACTTCCGTATAGTCAAAATTCTCCCCATCGCAGTTACCCAAAAGCGGCCGATCGTCCACGGACCAAAAGCGACCGCCTACGGTGTAACCGGTATGTACCACATCCGGCGCATACTCGGCTGCCGTGCCGGCACTGTACCGCGGCACAATGGGCACAGCCTTCGCCAGGCTCAGCGGATCCACATAGGTAAAATCCAGCAGACCGTCATCCAGCTTGCTATCCGGTGCCGGACAAAAGCCGCCGCCGTAGTAGCTGGCATTGCAGATGGCAAACAGGGCATATTCCATATTCTCCCGATGAAATTTATAGGGGTTGCCGTTTTCGTCCACACAGTCCAGTTCAACATTGACCTTGTAGCGCAGGGGCTGCATCATCACCGGCACCACGGCAATATTGTATGCCTGATGGCCCAGTGGGGGAATTTTACCTGCGATCTTGCGGCCGATGGTCTCCACCTTGGTGTCCAGCCCATAGCTCATCACATTGATGCACTTTTCGCCGTTATAGTCGATCAGATCCAGCGGCTCCACCGTGTAATTCAGCTTGCCGGAGTACAGGCCAAAAGATTTGATCACATTCTCCACATTGATCTTCTTGGTGCCATAGACTTTCTTGGCAAAATCGTTGCCGGTGCCCAGGGGCAGCAGCATCATAGGGGTCTCTGTATGTGCCAGGCCGTTGGCAATCTCATGTACTGTGCCGTCGCCGCCACAGCAGACAATGACACAACGATCGCCATACTTTGTCGCATAAGCCGTTGCAATCTCTCGGGCGTGGCCGGAATGGTCCGTCTCTTCCACAATCATCTCATCATCAATAAGACGAAAAGCGGAGCGGATACGGTTGAAAATCGCCTCTTTATCCTTATGGCCGGACACCGGATTCACAATAAATACATACTTCATCTGTTTTTCCCCTCTTTCACGCCGGATGCCGTCAGGCCAGGCATGCACCGCCCACCGGGCGCACTTGCAGCACATGGCAGGTGCCCTCGCCGAACACGCCCTCCAGCACGGCACGGTACTGCTCCAGCAGATCGTTTGGCACAAAGGCCTGAATGGTACCGGCAAAGCCGCCACCGTGCACGCGATAAGCACCACGATCACCCAGCACCTGGCCGCTGATGGCCAGCGCCAGGCTCAACCGCTGATCCGTGGGGTTCTTGGTGGTAAACACATTTTGATTATACATAAAGGAGGAGCGGCCGGAGGCATTGATGTCTGCCAAAAAGCCGTCAAAATTCCCCTGCTCTAAACAAGAGACAGCGTCCTCCACCCGGCGATTGTCATTATAAAAATGAATCGCGCGGATCAATGCCCGGTCATTGACCTTGGTTTGCAGCTCCGGCAGTGCGGCAAAGAAGTCCTCGTAAGCCACCTGACGCAACACAGACTTGCCCATGGCGTGCGCCACTGCTTCCATCTCGCTGCGAATGGCAGCGTAATCGTCCGTCAGATCCGAGTGGTTACCGCCGGTATCTACAATGCACAGGCTGTGACCGGAGGCAGCAAAGTCATAATCCACCTTTTGGATCACCGGCTCTTGGGTGCTCTCAAAATCAATGGTTACAAAGGCGCCTACGGAAGAAGCCATTTGATCCAGCAAGCCGCAAGGCTTACCAAAGAATACATTTTCGCTGTACTGTGCCACCTTGGCAACGGTTACCGGGTCGATGCCGCCATCGTTGTACAAATAAGAAGTGATGGTCCCCAGCAGCACCTCAAAGGCTGCGGAGGAGGACAGGCCGGAGCCGCCCATCACATCGCTGGTGGTTACCGCATCGTAGCCGCCGACGGTATAGCCCAAATCACTAAGCCGCGCAGACACACCGCGCACCATAGCCGTAGAATGGCCAAAGGCGTCTGCGTTGGGGGCCAGATCCGCCAAATCTGCCACATTCATTTGGTGGCCGGCAGACTTAACCCGCACCACGCCGTCCGCGTTCTTGGAGGCAACGGCAATGGCGTCCAGGTTAATGGCTGCCGCCAACACCTTGCCGTGATTGTGGTCCGTGTGATTACCGCAGATCTCCGTGCGTCCGGGAGCGGACATCAGGTGCACTTCCCGGTCTCCGCCAAAGGTTTCTGCAAAGGTGGTCAGAAGTTCCATGTACCGGGACTTCTGCTTTGCCACTTCCCCGTCGGTCACATATACCCGGCGAAAGGCGTCATCCAACTGGCCGGCTTTGATTTTGTTCATCATCGCTTGTGCATTCATAATTGTACCTCTTTGATTTTATAATACGATTTTGTATTTTTCTTTTTCGCTGTATAGAAGCAGGGTTTGGTTCATCTGGCGGGACCGACGGCCGTAATATATATTAAAGGCCATACTGGTAATGCCGGAGAACCCCACAATGATCATCAACAGCGTAATGAACCGCGCCGAAAACGGATTGTACAGCACGGTACCGATTTTGGTATAAATGTAAAGCCGGGGCGCAAAGCCCAGCAGGCTCAGACAAATATAGTAAAGGAAGTCGTAGTGCATGGAGCCATAATACTTGGACACCATACCTAAAGGAATGGACGGCACCAAACGGGACACAAAGAGAACATAAGGGTTACCGTTGCCCTTAAATCGAATCCAGTCCCGAATAAAGCGCATTTGACGAATGTTCAGGATCATACCGGCCCAGCCACCGCCGATCCAACTGCCTTCCGCGTATTTAACCGCGAAGAAGAACGCCAAAAACACCATATTGATCAGCATAGCCTGCCCCAACGGGAACACCACGCCGGAGATCACACACATCACACCCATAGGAATCGGCAGCTGGCACTTGGCAACATACAGCGCAAAAATGCACAGAATGATCTCAAAATCCGAGTCCAATCCTACAATGGACTCGTCCAGCCGACGCAGCCAGCTGATGAGCGCGTCAAAGCGCACCTCCAACTCCGTATGCTTATAAAGCGCCACAGCCAGCAACACCAAAAGCCCCAGCGTCACCAGTGCGATCACGCCGGAAATGAAGTTGGTTCTGTGCCGTTTTTGCTGCTTCAACGGCGTCACCTCCCTTATCTGCGGAGGATCAGTCCTCCTGCTCTCTGAAGTTGCCCAAAAACTTAAAGCCCGGCAACTCGTCCGACAGCGCACACAACAGGTCCAAGGTCACATCTCGGCGCACACTGCCCATAATATCCACATAAAAGAAATAGCTGAATTCGCCGTTACCCATAGGGCGGCTCTCAATCTTGGTCAGATTCAGCCCGGCCATGGAGAAACGGCCCAGCACCCGGTACAAAGACCCGGTGGTATGGGGCACTCGGAAGATCAGCGAGATCTTATCCACATCGTTACTAATCTGCATATCCTTGGAGATCACAACAAACCGGGTCCTGTTATTAGAAATATTCTGGATCTCCCGTTTCATAACCTGCAAACCGTATTTTTTTGCCGCAGTAGGTGAACAGATAGCGGCAATATCCCGCCGGTCGGACTGAGCCACATACTTAGCGGCCGTCGCTGTATTGGAATAAGTAATGCCGGTAAAGCCGAAATTCTCAATAAAATTACTGCACTGGGTCAGCGCCTGATGATGGCTGTAAATGCTCTCCACATCTTCATACCGGGTATCCGGGTGGGCGGCCAGGCAGTGCTCGATCTTTTCGTCTCGGGCTCCTACCATAAAAAAGCGGTACTTCATAATCAGGTCATAGGACTCGTGCACACTGCCGGCGGTAGAGTTCTCCACCGGGATAATGCCGTAGCGTGCCTCGCCCTTGTCCACTGCCTCAAATACATTCTCAAAATACTTATAATATTTGATGGGCACACCGGGAAACAGCTGCGCCCCGGCAATGGACGCATAAGCGCCCTCCACACCGGCACAGGCAATGCACTCACCGGGCGCCACAGCAATGGGGCCGTCCTGCAAGGCTGCCGTGATCTCTTTTCTTAAATCGGCGCCGCCGTCCATCATCTTGTGCTGGAGCGCACGGGAGGCGTCCATAGTAGCAGCGAACACGGTCTTGATCGTTTCGCCCCGATCGCCGCACTTGCCTGCCACATCGTCGAGAATTTGGCGTTCCCGCTCCTCATTGAGCACGGGAATACCCCGCTCCACCTTGTACTTGGCCACCTGCTCAGACACATCCATGCGCGCCATCAGCAGAGGAATCAACTGATCGTCGATACGGTCGATCTCTTTTCTCAGTTCCAACAAATCCATGTATTATATATTCCTTATATTCTCTTACTTTTCGATTTTATCCTTGGATCAGCAAATCCATCAGCCCAAAAGCTACGGCAGCCTCTACCACCGGCACGGCACGAGGCACGATACAGGGATCGTGGCGACCGTGAATGGTCAGGGTCTCCGGCTCCATGGTCTGCAAATTCACACTGGGCTGTGGCTGACCAATGGAGGGCGTAGGCTTTATGGCCACCTGAAGCACCAGGGGAGCACCGGAGGTCATACCGCCCAGCACGCCGCCGTTATTATTGGTCAACAGCGCCACCTTTCCGTCCCGGACGGTGTAGCCGTCGTTCACATCAGCACCAAAAGCACCGACAAAATCAAAGCCCAGGCCAAACTGCACGCCCTTCACCGCCGGAATGCCAAACAGCAGGGCCGAGAGCTTGCTCTCCACGGTAGAGAACATATTGCCCCCTACCCCCACCGGCAGACCGATGGCTGCGCACTCAATGCTGCCGCCCACACTGTTTTGTTGCAGCCGGGCAGCCTCGATCACTGCGCGCATATTCTCCTCCGCTTCCGGGTTCAGCACGGCAAATGTGCTGTTGCCCAGGCGGTTTAATGTCTCTTTATCAATGGAATTGGGGTCAAACAGGGCATCCTTTACCCCGCCCACCTTGGCAATATGGGCGCCTACAAACACGCCCTGCTGTGCCAAATACTGCTTGGCAATAGCACCGGCAAATACCAGAGGTGCCGTCAACCGGCCGCTAAAGTGGCCACCGCCTCGCACATCGTTACGGCCGCCATACTTTACATAGGCCGGATAATCGCTGTGAGAGGGTCGAGGTACCAGCGCCACATTGCCATAGTCACCGCTGCGGGTATTCTCATTGGCAATCTCCATGGCCAGAGGCGCACCGGTGGTGAGCCCATTCAGCACACCGGAGAGAATATGAGGAATATCCTTTTCCAGCCTGGGGGTGGCGGTTTTGTCACGCCCCGGGGCACGCCGAGCCATATCCTTATAAATGGCGTCCAAATCCACCGGGATACCGGCAGGCAAACCGTCAATCACACAGCCGATAGCCGGACCGTGGCTCTCACCAAAAATACTCAGTTGTACCTGCTCACCTGTTACTGATGACATCTGCCTTACCTCCCAGTGCACAAAAATCTTCAAAAAAGGCAGGATAAGTCTTGTTAATGCTCTCTGCCTGTTTGATCACGCTGTCACCTGCAGCATACGCTGCCGCCACAGAAAAGGCCATCACGATCCGATGATCGTTGCAGCCGTCCACTGTGCCGCCCTGCACCACGCCGGTGCCGTGGATCACCAGCCCGTCCGGCAGTTCTTCCACCTGCACGCCCATGGCCCGCAGATTCAGCGCCACGCTTTGTAGCCGATCCGACTCCTTAAACCGCAGCCGTCCGGCACCGGTAATGCGGGTGGTGCCCTTGGCAAAGGCAGCGGTCACCGCCAGCGCAGGCACCATATCAGGAATATCCCGAGCATCGATCTCCGCCGGGCGCAATTCGCCGCCACAGCACCGCACAATACGGTCGCGCACTTCCACCCGGGCACCGAAGCGCTCCATCATAGCACAAACGGCTTTATCCCCTTGGGTAGAGGCCGGGTTCAGTCCGGCAATTTCTATCTCCTGCCCCACCGTGCCGGCAGCCATAAAAAACGCCGCGTGGGACCAATCGCTTTCTACTGTAAAGTCCACAGGCTTGTACTGCTGATTGCCCCGCACCAGGTAGCCAAAATCCGTAGGCCGTACCTGCACGCCAAAAGCCGCCATCACCTGCAAAGTAATATCAATATAAGGCTTTGACTCTAATTCCGTTGTTAAAAGGACTGCCGAGTCGCCGTCTAAAAGCGGCAGTGCCAGTAGCAGCCCGGTCAGGTACTGAGAGCTGACGTTCCCGGCGATCTCATATTGCCCGGGTCGCAGCTTGCCGGTAATAGAAAAGGGCAGGCCCCCATCTGTCTGTACCTGCACACCGTGCTGTGGCAGCAGGGTGGCAAAGGCATCCAGCGGGCGCCGGGGCAGCCGACCGGCGCCGGTAAAGGTTACCGACTTGCTCAAAGCTGCCGCCACCGGGATCAAAAAACGCACCAAAGAGCCGCTTTCGTTGCAAAAAATTTCGTCCCGCCCGGCAGCCAAATCCGCCAGCGCTTGAACCGTGGCTGCAATATCTGCCGAAGTGCCCAAGGGCGCTACGGAGCCACCACCGGACAGCGCACTGCAAATCAGCGCACGAATGGCAAAGGACTTAGAAGGCGGCAGCTGCACGGTGCCTGCCAGCGGGGACGGCGTAATCTTTACTTGCATGCCCCACCTCCGAACATGGTTCGCAGGGTAGGCAGATCCACCGGATCAATAAAGCTGTCGCCAATCTTACGCAGCAGCACCAGTTTCATACCGTCTGCGGTGCGCTTTTTATCCGCCTGCATCGCGTCCACAATTTCATCCATAGAATGGGTATCCGCCACAGGCAGGTTGTATTTTTGAAGTAAGGCTGCAATGCGGTCCGCCGTGCCCGGTTCCGTCAGTCCTGCGCCCTCTCCGGCACGAGCCGCCAGCACCATACCGATTCCCACAGCGGCGCCGTGCGTCACCGTTTGATAGTTCCATAATTTTTCAATGGCGTGACCGGCGGTATGCCCAAAGTTCAGCAGGGCGCGCTCGCCCGCTTCCTTTTCGTCATGCTCCACCACCACGCGCTTCATATCCACACAGGCATAGATAATCTCGTGAATACGATCTTTAGCACTGGCCTGCTCCAGCAGGGCAAACAGCTCCGCCGAGCGGATACAGCCGTACTTGATCACCTCGCCCATACCGTCACTAAAGAACACATCCGGCAGGGTACGCAGCACCTGCGGATCAATCAGCACCAAAATCGGCTGGTGAAAGGCGCCGCACAAATTCTTGCCCATAGGCAGATCCACGCCGGTTTTGCCGCCCACAGAGGAGTCCACCTGAGCCAGCAGTGTCGTGGGTATCTGCACAAAATCAATGCCCCTCAAATAAATGGCAGCCGCAAATCCGGCCATATCGCCGCACACACCGCCGCCCAGCGCAACCACCAGGTCGCCCCGCGTCAGCCCCTCCCGGGCCATATAATTCACCATATTCAGCACGGTCTCCGGCTTCTTGGACGCCTCACCGGCGTCAAATACCAGGGTGCAGACCTGAAAGTCTGCGCTCTCCAGCGCCTGCACCACCCGGTTGCCGTACAAAGGGTACACATTGCTGTCGCTGATCAGGCAAATGCGCTTGGCGCCGGACACGCGACGCACCAGGTCACCGGCTTGCTCCAGCAGGCCATCGTCAATGAGAATATCATACGGTCTGCCGGTATGTACTGTGATCTTTTGCATCAGCCGATCTCCTCCTTAATCCGGTTGCCCTGTTCCATCAGCGCCCGCAGTGCCGGCGCATCCTCCGCCTCAATCGCAGAGCGGAACTTTTGCAAATTGCCAACTAAGTCATCAATCTCGCGAATCAGCGGCTCCTTATTATCAATAAATAACTGGGCCCACATCTCTGCATTGATGCGAGCCACCCGGCTCACATCCCGATAGCTGCCGGCGCTGAAGCCAGCGTGCTGGGGTGCCAAAGGTGACAACACATACGAGCAGGCCAGCACATGGGCAATTTGAGAGGTAAAGGCAATCATCTCATCATGATGCTCCGGGGTGGTCACCACCGTGCGGGCGAAGCCCATATCCTCTGCCAAACCGATCAGGGCATCCACCTTGCGGCGGGGTGCATCCACCGGGGTACAAATAAAGGACGCGTTGTCAAACAAGTTGTTCAGGCTGTTGTCATAGCCGGACACCTCACGCCCGGCCATAGGGTGGGCACCGATAAAAGTAAAAGGCAGATCCTTGTGCGCTGCCATTTGGCGACAGATCTTGGTTTTGATCCCGCAGGAGTCTGTAACCACACTGTCTTTCTTAAACAGGTCCTTGTGCTCCAAAATGAAGGGCACAATCGCCTCCGGATAAAAGTTAATAATGGTAATGTCTGCCTGGGGCAGCAGTTCCTCCAAAGAACCGGTGGCGTCAATGGCGCCGTCTGCCAAGGCACGCTGAGCCACACTGGGCGTGCGGTTCCAACCCAGCACACAATGTGCCGTGTTTTTCTTCAATGTTTTTGCCAGACTGGCACCGATCAGACCCAGCCCTAAAATCAATACTGTCATGAGAATTCCGTCTTTCCGTCCGTACCTACGAACCCAAAATCACAGATACTATAATAATATATTCCCTATCATAAGTCAAACGAAAAAGGCGAAAAGGCGCTCCTTTGGCTAAAAATGAACAGAAAAACGCCGCACCGAGTTGCCTCAGTGCGGCGAATTCATTTTAATTCCAGCGCTTATTTGCCGAATACATCGTACTCAGAATCGTCAAACAAGTCGTTGCCCTTATTGTTTGAAGGGTCGGATGTCATAACCACATCCTCGGACTTAAGCTGGTACTTGCGAACGGTGATCACCGGTTCTTCATAACTTTTTCTCATCTTAAAGTCCCTCCTTCCTTAAAACTGCACGGTCTCGCTTACAGCCTTGTCAGCATACACGGTATAGGTCTTGCCATTCAAGGTGTAGGTCACATAGGATCTGTAAGTCAGATCATAGGAACCGGACAGCGAAGTGGACTTGATGCTGACCACATACTGGCCGTAGTTATCATTTTCACCGGTGTGCTTGGAAGCCTTCAGACGCTTAATGCTGCTGTCGGTGCCAGCATTCTCCAGAGTCAGAGTCTTGCCGGCAGCGGTGGTGAACAACATACCATACTCCACAGCCTTGGCATTCTCCGGAAGAGCAAATTTGCCGATCATGGAGAACTTGGTACTGGCTTTTACGATGCCATCACGGGTGGAGGAGGAAGCATAATTGCTGTCACAATCCATCAGCACATCCGTTCCGAACTCCGGATCGCTACACATATCCAGTACATCGCTAAGGGTCATACCCCAGATGGTAATATCCTCGCAGGCACGGAAAGCCAAGGTGCTGCCATAACCAACAATGCGATAGCCATTTGCCGTATCACCATTCTTGTTGGTAGTGCCTCCCTCGTAATAGGCTACCCAAACCTCTGCCGAGTCATCCGTAGTGGTGATGTAAGAGTTGTACTCGAAAGCACCGCTTACATCCCCGGCCTCAATGTTAAATTTGGCAATGTTCGTCACATCGTACTGTGCGATAATGGTGGTGTCACCGGTTACGTTAATCTTTGAACCGGCGGCTGCGTCGTTGTCATAACCGCTGAAGGTGTAGAATGCACAAGCGGGAGCGGTGGGCATGGTCACGGAGCCGCTGGTGTAAACCACATCAAACACATGACCGTTAATGCCGTTGACAAAAGTCACTACATAATTGGCCGCGTCGCTGTCCGCCTTCTCTGTGGTCAGATACGTGTTGCCCTTAACCACAAAGCCGTAGCTGGGTGCGGTGGTCATATACTTGGGTGCGGTGGTCTGGGCAACCTGCACGGAGTTGTAGCTGTAGTACCAAGCATACTTGGCAGCGCCGGTCTCCGTTTCAATGTTGTCATTGGTGCTGACGGTACCGTCACCGTTAACTTCAATGCGGGCACCGTAATTGTAAGTACCCAGCGGATCACCGTTCAGGTACACAGTGTAGGTCATGGGCTGTAAGGACTCCAGCAGTGCCTGGATGTCAGCATTCAGGCTGTTCATGTCTTTGTAGGCAATACCCACAATGTCCTTGCCGTTGACCGTCACGGTCTTGTACAATTCAAAACCGGTAATGGCAGACAAATCATACGCATCGGAATCCTTGCCGTCCTTTGCCTTGGCCAGTGCAGCCTCTGCTGCGGACAGATCCAGAGTTGAAGCGGTAATGCTGTATGCATTGACCTTTGCGGTCTCTGCGTCGATCTCAGTCTGCTTGTCGCCCATGGTAGCGGCACGCTGATCTGCGTCGTAGTTGTAGTAGGTCAGGCCCTTAATGAGCGCAGCCACGCCTTCCAAGTCGCTGGCGGCATAGGTCTTGTTGGCCAAAGTCGTCAATTTGGCCACCGCTGCATCCAGCGCGGAGAAGTCGGCATTATCCATCTTGGAGCTGTACTGAGCGGTGTAAGTCACAGCACCGGTCACCAGCGTGGAATCGGTGATCTCCGGATCCCAACCGGTAAAGGTGTAAGAGTAGCCGCCTTTCTTATAGTCGGTTACATCAACCGTGTCGGCCTGCGCCTTCAGGTTTGCACCGTACTCCACTTTATTAATCGTCTTGGAGGTATCGTTCCCGTTGGCATCCTTATAGTTAAAGGTCAAGGTGAAGGTGTTCAGATCCAGAGCGTTGTAAGCACGCAGCAGCGTGGTGTATCTGGTCTTCGCCTCGGTAAGGATCTCATCCGCGGTCATCGTGTTATACGCCATCTGGCCCTTAGCTTTTCTCAAAGCATCGGCAAACTTGGTCCAGGAAGCGTCGGTGTACTTGTTGCTGTCGGTCAGTGCGCTGCACTGGTCGATCAGGTCAAACAGATACGCAATATCTACTACCGTAGCGGTCAAGCTGTAGTTCTGTACATCGTGGCGAAGTACAGTCCAAGCGCTCATGGGCTGGTAGCTCAGCCGGGTCACAGCACCCACATTGCCGGAAACGGTATAGATCTTTTTGTTGGGCAGCGTTGTGGTGGTCAACTTGGCGGGGGCGTTATCCTTCGCAACACTCATGGTATAAGCACCTGCATACGTGTTGCCGCCAAAGTTACCACTGCCGCCCTTACCATGTACAAACAGAACATTCTGCGTACCCTGGTTATTAGAAGCCTCGCTGGTGGCAATGTCCAGCACATTGGTGGACTTGTCATTAATTCGGTTACCGCTTGCATCCACTGCAAAGGCATCCGTCTTGTTATCTACCTCTACCGCGTACAGGTCCTTCAGTTCCCATGTTGCGGCAGTGGTACCGGAGGTCTTAATGGCATTACCGGGCTTAATGTTCTTCTTGGTTACATATTCGTCCACATCGGTGTCTTTCAAACTGGGGGTCTGACCGGCACCTATGGCACGAGCCACCAACTCACCGGTATCCCCTTCACCTGTAACGGTATCGTTCAAATTGAAGAACAGAAGCTGGTGATCGTAATCACGCCAGGAGCCGAAGAACAGCATCATGTCGCCCAAATTAAAGGTGGTGGCTTCATGGCTGGTACGGATCATAACCGCATTGTTGGGGAAGCTGAAGCCCAGCGCCACAGAACCGTTGATCTGTGTATCGTTAACCATACTGCCGCTGGCACTCTTGGAGTTGGGCGAACCAACGATCAGGTGCTCCGCATTGGTAGCCACCGTACCGTTGGGCAGCGCTGTGAAGGAGAATTCCAGTGCGTCATAAGCAGTCAGAATCTTCTCTAAAACCGCAGTGTAGTCAGCCAGCAGCTGCTCCGGCGTAGTCATGTCTTTGTTGTCCAGCGCAGCCATCTCAAACTTTGCATCAGACACAGCCTGTACCAGCGCGTCGAAGTTTACATATTTGGAGCCGTCCAGTGCTTCATAAGAAGCCAAAATGCTGTTCCAGCTCACATAGTGGGTTCCGCTGGTAATATGCAGATCATGATTGATCCGCAGGGCAGGAATGGCAGCCAATACCGCAGCGGTCTGATCCGCAACGATCTGGGTGTTCTCATCCGTCTTCTGCAATGCAGCAGAGGGAACGCCGTAGTTCTCCTCAGTGCCCCAAACTGCCTTCTTCGCATTGGCGACAGCATCGGTCAGGTTGGCATAGGTGTCCGGCGTAAAGTAGGTCTCATACGCCTCCATGCCGTTTGCCTTGGTGATGGCTTCTACCAATGCGGTGGTGTCTACTCTAGAATTCTGTGCTTCCTCCAGCAGAGCATCATAAGCCTGCTGCAGTTCTACTGCCAAAGGCGTTACGGTGCCGTTAGGCTGATAACCGCTCCCCACAGCCATAATGGCGGTGTAGGCAGCCTCATACGCGGACTTAAAGGCGTTCCAATTATCAGAAGAATAAACGCCGTTATCATTGCCGGCTGTGTAAGTGGCCTTGGTCAGGTCAATTACATTGCGCAGCTGATCGTAAGAGTCATCGTCTGCCGTCAGTGCACTCTGTGCGTTGGTCAGCGCCGTGCGGGCGTTGTCAATATCCGTAGCGCACTTGGACGCAGCATCTGCAGTGTTGGAAGCAAAATTGTATGCGGTGCTGTCGGACGGATTGATAGATGCCAAAGCGCTGGCAGCCACCAGCAGGCTGCGCATATCCGCAGCATCATTACAATAGTTTTTAATATTAGAGATGGTGGACTTGGCAGTGGCCAAAGCCTCTTTCACCCCGGCATAGTTGATCACATAGCCGTAGTTGTGGCCATCGTGTTTTTCCTGGCTACCGCCCTTATCACCGGCCAAGCACTGGGAAGCAGCAATGATGGCTGCGCGATTCTTGTCGTGGTCATAAATGGTGAAGCGGGTGTCGATTGTAGTCAGCGGGGCGCTGGGGGTGCCGCTGTAAGTCACAAAGCTGGAACCGGTGTTCTGCTTAGTGTTGTTTCTGCCGGCGCTGCTACGAGTCCAGTAAATGGGAGAATCGGCACCGGAAGCAGCTGCCACAGTGGGAACCACCGTGCCATCGGAAGACATAAACGGAATGTTACCGCTCTGGTCCTTCTTCACCGTCCAGTTGGCCAAAGTCAAATCCGTGTTGTTCACAGCAACTGCCGTAATACCGCGAGGCTTAGCGGTGCTGCCGTTATTGAGCAAATACTCATTGCGGTACTCATAGCTGAACTGTGCCGGTGCCCGCAGCGGTGTGGTGCCGTCATACAGGAACACATAGTCGCTCATGATAATCTTGAACCACTGCTTGGCGTCGTCGTTATAGTACCAGGAGCCAACCACATCGTTAGAGAAACGCAGGTTGCCGCCGTAGTACAGCAGCCCGTTGGCATAATCGGAAGCCACGGTTGCACCGCTGGAGTCCGTTACGGTGGCATAGGTCACATCGGTGGAGAGCACCGTCTTCTGCATCTCCGTCGTTGCGGTGGTCAATGCCTGTGCAGCAGTTCTTAAATCCTGAGACGCGTCGCCGCCATAGACATACATATCCCGCGCTTGTTTGGCGGCCATATATTTGTCGTAAGCCGTGGCCATATCCGCATAAATCTTGCCGTCCATAGCAGATTCGTATGCGTTAATAGCATTGTCCAGGGTGATCAAGGCGTCCGACTTTGCAAGGGTGGGACCCTCAGCAAGAGCGGTGAGCGGCAGAGCCGTCAGCACCATGATCGCAGCCAAAAGCGCCGATAAAAAGCGCTTGCCCTTTCTTGTTTTCATAAATCTTTTCCTCCTTATTCTGCAACCGGTAGGTACGCCTCGGCGCCCTGTGCATCCGTCCACCTTTCTGACCAAAAGGCCGACGGCAACGCGCCTAAAGACCCACCCAAATGCCAATTGAGAAAGAATTAACAATACAGGTAATGGGCATACCCCTGCCCATACATATATTACAAGACAATAATACCACTTATACCCCTGCAAGTCAAGGTAAATCCGTTGTTTTGAAGTCGTAAAAATTAACAGAATGTTCAAATTCCTTTTGTGCATAGTACACAAAACAAATGAGTAATTCGTGGATTTTGTCTAATAGCAGACAGCTGTCTAAAATTGCAATATGCTGTCTGTATATATGCTGTTGGAATATGCTGAAATTAAGCCGCCGTCCTTTTTCTATCCTTATGCGCCTTCTGCAATCGCTTAAGGCACAGTAAGACAAAGCGCATACGAAATAGATACAATACTATATACGGTAAGTTGCACTATATGCAGTAAGTTGCGGCTCCGATTATACATTTATGCACGCCAATTCCCGATTTATGCAGGATTTTCTTGTAATTTTATACAAATCCTCCTGCATATTTGGCTGTTTTTTTGCATTTTTATACGAATTTTGCCAAATCGCTTGCAATTCCAACCGGGAGTTTATATAATGGGTACAGTTTTTGAAACAAGGAGCGTGCTAATCATGGCAAAAGAAATTAAAAAGGTCGTATTGGCTTACAGCGGCGGCCTGGATACATCTATCATCATTCCGTGGCTGAAAGAGCATTACAACAACTGCGAAGTGATCGCCGTGTCCGGCGATGTAGGTCAGGGCACCGAGCTGGACGGCCTGGAGGAAAAAGCGCTGAAAACCGGCGCCTCCAAGCTGTATGTGCTGGACCTGAAAGAGGACTATGTAAAGAACTACATCTTCCCCTGCTTAAAGGCCGGCGCAGTGTACGAGGAATACCTGCTGGGCACCAGCCACGCCCGTCCCTGCATTGCCAAGGGTCTGGCAGAGATCGCCATCAAAGAGGGTGCAGACGCCATCTGCCACGGCTGCACCGGCAAGGGAAACGACCAAGTGCGTTTTGAGCTGAGCTTAAAGGCGCTGGCACCGGAAATGCAGATCATCGCCCCTTGGCGTGAGTGGGACATTAAGAGCCGTGAAGAAGAGATCGAGTATGCAGAGGCGCACAACATTCCGCTGAAGATCAATCGGGAGACGAACTACTCTAAGGATAAAAATGTATGGCACCTGAGCCACGAGGGTCTGGATCTGGAGGACCCGGCCAACGAGCCTCAGTACCTGAAAGATGGTTTTCTGGAGCTGGGCGTTGCCCCGGAGAACGCACCGGACGAGCCCACTTACATCACCGTTCACTTTGAGAAGGGCGAGCCTACCGCCATTGACGGCGTAGAGATGAGCCCCCTGACCCTGGTGGAAAAACTCAACGAGCTGGGCGGCAAGAACGGCATCGGTCTGTTGGATATTGTTGAGAACCGTTTGGTAGGCATGAAGAGCCGCGGTGTATATGAGACCCCCGGCGGCACCATTCTGTACAAGGCCCATCAAATGCTGGAAATGATCACCTTGGATCGGGACACTGCCCACTACAAGAAACTGGTGGCGGAGAAATACGGCGAGCTGGTATACAACGGCCTGTGGTTCTCTCCCCTGCGTGAGGCACTGGACGCATTTGTCAACAAGACCCAAGAAACCGTAACCGGCGATGTGAAGCTGAAGCTGTACAAGGGCAATGTAATGAACGCCGGAATCACTTCCCCTTACACCCTGTATGACGAGACCGTAGCCTCCTTTGGCGACGACGGCGGCGCATACAACCAGAAAGACTCTGCCGGGTTCATCAACCTGTTTGGTCTGCCGCTGAAAGTAAAAGCGCTGCTGGACCAAAAGCGGGAAGCAAACGAAGACTAATTGTCAAAAGTCAACGAATGACAGGGCGCACGGCCCACCGTGCGCCCTGATTTTTGCATTTTACAGAAAGCAGGAGATTATGGCACAATTATGGAAAGGCCGGTTCAAAAAGGAACTGGCAAAAGAAACCAACGATTTTAACGCCTCCATTCACTTTGACAGCCGCATGTATAAAGAGGACATTACCGGCAGTATGGCCCACGCCACCATGCTGGGGGCATGCGGGATTATTGAAAAGAGCGAAAGCGAAAAGATCGTGCAAGGGCTGAGCGAAATTTTAGCGGATATTGAAAGCGGCAAGCTGGCGATTGATCCGGGTGCGGAAGATATTCATACATTTGTTGAAAGTGAGTTGACCGCCCGCTTGGGCCAAACCGGCAAGCGACTGCACACCGCCCGCTCCCGCAATGACCAGGTAGCGCTGGACATTCGCATGACACTGAAAAAAGAGATCGACGCCATTGCCGCAGACATAAAGGATCTGCTGGCGGTGCTGTGCAAAAAGGCAGAAGAAAACAAAGGTGTGATCCTGCCGGGCTACACCCATTTACAGCGGGCGCAGCCCATTACCTTCGGCCATCATCTAATGGCCTATGCCGCCATGCTGTGCCGCGATCTGGATCGACTGGCGGATGTGAAAAAACGCATGAATGTGCTGCCCCTGGGCAGCGGCGCTCTGGCCGGCACTACCTACCCCATCGACCGGCAAATGGTGGCGGCGCAGCTGGGCTTTGACGATGTAAGTGCCAACAGCCTGGACGGGGTGTCCGACCGGGACTTTTGCATTGAGCTGGCGGCAGCACTCTCTCTGGTGATGGTGCACCTGTCCCGCTTTAGCGAGGAGATCATTATGTGGTGCTCCTGGGAGTTTAAGTTTGTGGAACTGGACGACGCCTTTTCCACCGGTTCCAGCATTATGCCCCAAAAGAAAAACCCGGACATCGCCGAGCTGGTACGGGGCAAAAGCGGCCGCGTTTTCGGCGATCTGACCACCCTGCTGACGGTGATGAAGGGCATTGCACTCGCCTACAACAAAGATATGCAGGAGGACAAGGAAGCCATCTTTGATGCAGTAGACACGGTAAAAATGTGCCTGCACGCCTTCACTCCCATGATCGACACCATGACTGTGTTAAAAGACAACATGCGGGCGGCGGCAGCCAAGGGCTTTATCAACGCAACGGATTGCGCCGATTACCTGGTGGGCAAGGGCTTGCCCTTCCGGGACGCGTACAAAGCCACCGGCGAGCTGGTGGCCCAGTGCATTGACCGGGGGCTGACCCTGGAAACGCTGCCACTGGAGGACTACCGGGCAGTTTGCAATCTGTTTGACCAAGAGGTCTACCACAAAATCAATTTGGACACCTGCGTGGCCACCCGTATTTCCGAGGGCAGTCCCTGCCCGGAAAGTGTGGAGCAGCAGATCGGCAAAGTACAGGCGTTTCTCGACAATTATCCATTATAAAATATTGGCACTCTCGCCTTGACTACGCCGGGGTATAGGTTTATAATATTAAGCAAAACCGGAGTACCGATTGAAAGTTGAGAACGATATGGACTACAAGATCATTGCAGACAGTTGCTGCGACCTGACCGATGAGATGAAAGACTGGGGCAACCTGGCTCTGGTTCCGCTGACGCTGGAACTGGGCGATTACCGCATTATGGACGATGAAAACTTCGATCAGGACGATTTTATCGCTCGTATGCAGGCACTGGGCGATGTGCCCCGTTCCGCCTGCCCCTCGCCGGACGCATTCTGTGCCGCCATTGCCGCGGACGATGCCAAAGAGGTGTATGTGCTCACCATTACAGACAAGCTCTCCGGCTGCTACAACAGCGCCCTGCAAGGGGTTATGCTCTATGAGGATGACCACCCGGGAGAGAAGAAGATCCATGTATTCAACTCCCTGGCCACCAGCGGTCTGGAAACCCTAATCGCTTATGAGATCCGCCGCCTGAAGGACAGCGGTTTGCCCTTTGAGCAGGTAGTGGAGCAGGTAGAGGATTATATTCACAACCACACAGCGCTGTATTTTTGCCTGGAAAGTCTGGACGCACTGAAAAATAACGGCCGTCTGTTCTCTCTGGCTGCCACAGTGATCAAGAAGCTGAAAATGAAGCTGATTTGCCAACGCAGCAGCGAGGGCACCATCAGCCTGGCCGGGCAGGATTTTGCCGCCGGGCGCGCCATTACCAAAATGTGCGACCTGATCGCCAAGGATGTGGAGGGCAAGGATCTAAGCCGCCGCACCCTGATCATCAGCCATGTGTGCTGCCCCGAGAAAGCAAATACGATTGCCGACAAAATACGCGAGAAGTGCAGCTTTGGCAACATTATTATTCTGAAAGCCAGCGGGCTCAACTCCCTGTACGCCTCCGGCGGCGGGGTGATCGTGTCCTATGACAAATAAAAATCCATATTTAAGAAGAAGGTAAGTACATTGGAAATCAAGTATGAGTTGACCAAAACACCGAAAGAAAAACCCACCGGCGCTCTGGGCTTCGGCCATATCTTTACGGACCATATGTTCGTCATGGATTATGACGAGGGCAAGGGCTGGCATGACGCCCGCATCGTCCCCTATCAGCCGCTGGTACTGGATCCCTCTGCGCTGGTGTTCCACTATGCGCAGGAGTGCTTTGAGGGCCTGAAGGCATACAGAACCCCCGAGGGCAAGGTACAGCTGTTCCGCCCGGACAAAAACGGTGCGCGCCTGGCCTCTACCCATGACCGTCTGTGCATTCCGGAGATCCCGGTGGAGGATTTTGTAGAAGCGGTCCGCGCTTTGGTAAAAGTGGAGCAGGACTGGGTACCCTCTGAGCCGGACACCAGTTTGTACATTCGTCCCTTTACCATCGCCACTGAGCCGGTACTGGGCGTAAAGGCCTCCAGCCAGTATAAGTTCATCATCATCTGCTCCCCCTCCGGCGCTTACTATGAAGAGGGTCTGGATCCGGTGAACATTTATGTAGAGGACGAGTATGTGCGCGCCACGCCCGGCGGCACCGGCTATATCAAGTGCGGCGGTAACTACGCTGCCTCCATTATCGCCTCCGAAAAGGCACACAAGCTGGGCTTTGCTCAGGTACTGTGGCTCGACGGCGTGGAGCGCAAGTATGTTGAGGAAGTTGGCTCCATGAACATTATGTTCAAGGTAGACGGCGAAATCTATACCGCACCCACCGTGGGCACTGTGCTGCCCGGCATCACCCGCATGAGCTGCATTGAGCTGCTGAAGAAGTGGGGCTACAAAGTGCACGAAGAGCGCTTTACCATTGACTTTATTATGGACGCTGCCAAGACCGGCAAGCTGGAAGAAGTCTTTGGCACCGGCACCGCAGCCGTGATCAGCCCCGTTGGCGGTCTGACCTATGAGGGCGACAGCGAAGTGATCAACAACGGCGAGATCGGCGAAGTGACCCAAAAGCTGTATGACACCCTGACCGGTATTCAGTTCGGCAAACAGGCCGACGATATGGGCTGGATCGTACCAGTAGAATAATCCCAAACCAACCTACACCGGCAGATGTGCACCTACATCTGCCGGTTTGTTATCCCTATGAGAAAAATCAGCTATACCGTGCCACCGGCTCTGGACGGCAGCAGCGTGGCGGCGGTGCTGCGCAGCCACGGCTTCTCTACCGCACTGCTGCGCAGTCTGAAAAAGACATACGGCGCCCTTAGCCGCAACGGTTGTCCGGTGCGTACCGTTGACCCGGTGCATACCGGCGACACCGTCACCGTAGAATTAAATACAGACGGCGCCACTGCACCACCCTCAGCGGAAAAGGCAGTAATCGTCTATGCCGACCGGGATATTTTGGTGGTGAACAAGCGCGCCGGTATGGCCATGTACGAGACCTACAACCACCACGGCAACGCCCTGTCCAACGCAGTGGCAGCCGCCGGATTTGATGGCCCGTTCCGGCCAATTTACCGGCTGGACAAGGACACCAGCGGCCTGGTGGTACTGGCCCGGCACCAGCTGAGCGCCGCCAAGCTGGCCGGTCGGGTACAAAAGGACTACTATGCGGTGGTGCCCGGCACCTATACCGGCAGCGGCACCGTAGACGCACCCATTGCCCACTGCCCGGACAGCACCGTGAAGCGATGTGTTGACCCTGCCGGCGTGCGGGCGGTGACCCACTGGGAAGCCCTGGGGCAGCAAGGCGGCCGCACCCTGCTGAGCGTGCAGCTGGAAACCGGCCGCACCCACCAAATTCGGGTGCACTTTGCCCACCTGGGCACACCCTTGGTGGGCGACAGCCTATACGGTACGGCGCCCATCGGCACCCGCCACCTGCTGCACTGCAAGACCATACGCCTAATACACCCGGTGCGGGAAGAGCCGGTCGCCTTTGACTGTCCCTTTCCGTCGGATATGGAGGAATGGAACCAATGCCTGCCTACTGCACCCACTACATCTTTGCCTGCGAGCTGCTGCCCGCCTTAACGGAACTGGCGGGTTTTGACCTGAACCGGGACGCAGTAATGCTGGGCACCCAGGGGCCGGATGTTTTCTTCTTTCACCGCATTGCCCCCTGGATGCCGGGCCGCTCCCAACGCAAGATCGGCTCTCGACTGCACCGCGCCAAGCCCGGAGATATACTGGACGCCATGGCAGAATACTGTACCCGGTGCAGCACGGAAAAGGACATTGCCCGCTCTTACGCCTACGGCTTTATTCTCCATTACGCCCTGGACCGGCAGTGCCATCCCTTTGTGTACGCCAAGCAGCAGGAACTGGCGGACAGCGGCAGCCCCCTGCACAAATCCGCCCTGCATAATATTGTGGAGATGAGCATGGACGCAGTGCTGCTCCACGAAAAGCTGCACATTGACGACCCTCGGTGCTTTGACACCGCTGTTACCGTGCCGGATGATCCGGCTGTGCTGGACGAGGTGGCCCGACTGCTGAGCTTTACCGTCTACCGGGTACTAGGCAAGCGGCTTCAACCGCAGGACGCCCGGCGAGCGCTGACCGACACCAAAACGATGCAGCGGTTGCTGCGAGACGCAAACGGAAACAAGGCCAGGATCGTGGGCGGCATAGAGACAATTTTGTCCCCCTTTACAGGAAATTTTCGTCTAACCTCTATGTTGCGGCCAAAAGACTTGGAAAAAGCAAAAAAATATGGTAATATAGAGAACAGGAACTGGCGCTCCCCTTACGCACCCGGCGTGCGCACAGAAAGCTTCTTTGACCTTTACCGACTGGCAAAGGACCCGGCACAGGAAATGATCCGCGGTTTTGACCGGATCTGCGCCGGCGAAACCGACGGAGCCGCCGTCACCCAAAATTTATCTTTTTTAACCGGAGTGGAAGTAAAATGAAAAAAATTCCCAGCTTTCAAATCGATCACACCATTTTGGAAAAAGGCATTTATATCAGCCGCATTGACGATGATATTACCACCTATGACATTCGTATGCGCGCCCCCAACCGGGAGCCGGTGATGACCAACGCCTCCATGCACACCATTGAGCACCTGTTTGCTACCTATGTGCGCAATACGGAATTTGGCGACAACATCATCTACTTTGGTCCCATGGGCTGCCGCACCGGGTTCTATTTTCTCACCCGCAGCCTATCCGACAGCTACTGCATTCAGCTGATCAAGGACGCCTTTGCCTTTATTGCCGACTTTTGGGGCAGCATTCCCGGCGCTGCCATGAGCGAGTGCGGCAACTGGCGGGACCACAACCTGCTGCAAGCCAAGGAGGACGCTAAGCAGTTTTTAGAGATCATTCAGGACTGGACCAAGGATGACCTGAAATACCCCACAAAAGACGAAAACTAAAATAACAGCATACAAAAATCCCGCTTGTTCACACAAGACAAGCGGGATTTTCTTTTTTGCTTATTTATTGCAGTTTGGCGGTAAAGTCCGGTTCGATCAGCGGCAGACCCAGGCGGTGCACCGCTTGTTTCACAAAATTCTCGCTACCGGTATTAGGCAAGGGCAGCCCCAGGAACACAAAATTATAGATCACCAAGTCCTCAAACTTAGGCTCCATCTCGTTCTTCACCTGCACAGTGCCGTCCGGGTTAAAGTGGAAGGTAAAGCGCCGCTCATGGGCAGTCTCTATCGGGCGGATCCACAGCTTCAAACTGCCGTCCGGCTGCCAAGCCGCCTTGGAATAGGCAGTGTAATGCAGGTCTCCCAGCACCATGGCCGACACGCCGTAGCTGCCGTCCATACCCACTTCAACCGTGTTTTCATAATCCTTCTCCCGCCAATAGAAACGGGCGCCCTTCGGGGTAAATTCAAAGCGCATAGCATTGATCTTGCCCGGCTTGCGATACAGCATTTGCGTCACAGAAATGGACACCACGGAGGTGAATTCCGAGGTTTTGCAGGTCATCAGGCGACCGCCGATTTTTTGCTCTATTTCGGTATTCCGGGGCGTGACAGGCAGATCCTCCACAGCACAGGCGTCCACCGCCTGTTGCAGCGCTGCCTGACCCTGCGGATCCGCAGGCAGTGCCTCCGGCCCAAAAGCCTCCGGGAAGTGTTTCCAAAACACCTTCATAATTTTATAGTCCTCGGACTGGCCGCAGTTGAGCACCATCATGGCGTCATACTCCGGCAGGAAGAAGCAACGCTGACCAAAAAGGCCGTCGCAGCGGTAGCTGTTGGGCAGCGGATTGCGCCAAAACTGGAAACCGTAGCCGCACATATTGTCAATATAACCGTCAGACACCGAAGGGGTCTGCTTGGCCGTAGCCTGCGCCACCCAATCGGCAGGCACCAACTGCGTGCCGTCCTTGTACTTGCCGCCATGCAGATAGGGCAGGAAGAACTTGGCCAGATCCTCGCTCTTCATATACAGACCCCAGCCGCCGGCGTTGTTGCCCCGGCCGTCCGCTTCCCAGAAGGGCTTTTCAATACCCAGGGGTTGGAACATACGAGGATAAAGATAATCCACCATGGACATACCGGTAACCTTGGACACAATGGCGGAGAGCATGAAGGTGTTCTCACTGATGTAATTGAACCGGGTATCCGGCGGCGCCAAAAACGGCGCGGCAAAATAGCTTTTGATCCAGTCGGTGTTCCCCTTCTCTTCAAACACGGTAATCAGCTTGTCGGAGCGCATGGTTAGGAGCATACGCACGGTCAACGCCTTGTTTTGTGCGCCATGCACCTTATATTCCGGAAAAAATTTGTACACCTTGTCGTCCAGGCTGAGCAGGCCCTCCGCCACGCAAAAGCCTACGGCCGTGGAGGTCACACTTTTACTCATGGAGTAAAGCACATGGGGTGTATCCGGGCCATAGGGCTTCCAAAAGCACTGGGCGAACACCTGATCGTGGCGCACAAACGTAAAGCTTTGAAGCCCCAAATGCTTCTCATTGATCTCGTTGATAAACGCGGCCACCGCACTGCTTTTTACGCCCACTTCCTCCGGCGTGACATGCTGCAACTGGCAGTCCTTTAAGTTTTCCATAAAAATGTCCCCCTTAAATTTGGCAAAATAGCCGTATCCGATTTTTATTTTACCGCAGGCAGCGCTGCAATTCAACCACTTTTTGTCAAAAACGCTACCAAAAGCCGCCCGATCCGCCGGATAATCGGCAACCGAAGCCTTTTGTATTTTAACAGACAGTCCCGCCGGGCAAAAAAACCACGAATAGCGGTTGCATTGTGGCAAATCTTGTTGTAAAATTAAGATGTGTATGCAATAAGAATACACCGCAAGATAAAAACGAGGGATTGGACCAAAAATGAAGCATACGAAGGACGGCAAAAACCTAAATGCGCTGCTGCGTCGTGCCATGCTGGGCGTACTGGATATTATGCTCTTTGCCCTGGCAAATTGCAGCATCTGCTACCTGACCATGAACGGCCACATTATGGCCACAGACTACAAATACATGATCTTCAACTACCTGCACTTTGGGCTGACCAGCGTGCTGTTGGTGGGGATCAATTCCGCCTTCGGTCTGTATCGCAGCGTATGGTACTTTGCTGGATCGGACGAGATCGTGAAAAGCTTTTTAGGTGCCTTAGTCAATGCCGTACAGCTGTTCTTGTGTGACCGCTTGCTGTTTGCCAAGCTGCTGCACACCAAGGGTTACCTGCCTTATTATGCCTATATTCTCTTTTTTGTTCTGATGTTCGTTGCCACGCTGATCCCCCGGATCGGTTATCGTATTCTACGCCGATATGTGCATAATTTGGTCGGCCGCCGGGACGGCCAAAAGCGTATTATGATCGTGGGTGCCGGATTTATGGGCAACTTTATCATTGACGAACTGCGCAACGGTCACTACCGGGAGGGACGACCGGTAATCGCGCTGGACGATAATCCTGCCAAGTACAAAAAACGCATTAACGGCGTGAAAATCGTGGGCATCTGCGACGACCTGCCCCGACTGACCGAAAAGTATAAAATTGACGAAATCATCTTTTGCATTCCCTCAGCAGCACCGGCGCGGCGGCGAGACCTGGTAAACCTGGCTATGGGCACCAAGGCCAATGTAAAAATCTCTCCCTCCGTGCAGGAGTTTTGGGAGAACGGCAACGGTGCCCAGCGGATCCGAAATGTGGAGATCTCCGACCTGCTGTCCCGCCCGGAGGTGACCCTGGACAAAAAAATCTGCCGCTACCTGATTGGCAAAACAATTTTGGTTACCGGGGGCGGTGGCTCCATCGGGTCCGAGATCTGTATGCAGGTAGCCCGGTACAACCCGGACAAGATCGTGATCTTTGACATTTACGAGAACTGCGCCTTTGAGCTGTTCAATGCGCTCAACGAGAAATATAACGGCGAGATAGATGTGTATGTGCGCATCGGTTCCGTGCGGGACACCAAGCGGCTGGACGAAGTGTTTGCCGAATTTCACCCGGATGTGGTGTTCCACGCTGCCGCCCACAAGCATGTGCCGCTGATGGAAACCTCGCCCTGCGAGGCGGTGAAAAACAATGTGTTCGGCACCTACAACGTGGCCGTTGCGGCAGACAAATTCAAAGTGCCCAAGATGGTCATTCTCTCCACCGACAAGGCGGTAAACCCCACCAATGTGATGGGTGCCACCAAACGACTGACGGAGATCATCATACAGTATATGAACACCGTAAGCCAAAATACCCGCTACGCCGCCGTGCGCTTTGGCAATGTGCTGGGGTCTCACGGCTCCGTGATCCCCATCTTCCAGCATCAGATCGCCCAGGGTGGCCCGGTGTGTGTGACCCATAAGGACATTACCCGCTACTTTATGACCATACCGGAGGCGGCACAACTGGTGTGCCAGGCCGGCGGTTTGGCTCTGGGCGGCGAGGTGTTTGTACTGGATATGGGCGAGCCGGTGAAAATTATGGATCTGGCCAAGAACCTGATCCGCCTATCCGGCTTTACAGAAGAAGAAATACCCATTAAGATCACCGGCCTGCGCCCGGGCGAAAAGCTCTACGAGGAGCTGGCCATGGAAGAAGAAATGCAAGGCCGCCAGCGCACCGCCAACAAAAAGATTTTTGTCACCCAGCCTGTGGAAATTGATAAAGATCGCTTTGCCGCCATGTTGGAGGATCTGGCGAACATCACGCCGGAGACTGTGCGCACGGTGCTGATGCGCTATGTGCCCAACTACCACCCGGCTCCCCCGGAGCAGGGCAATACACATAAAGGAAATTAAGGAGGAACCCTATGCTTTATCGTACGGATTTTGACGAGAACGGCCGCAAGACCCTGTGCCAAATGGACGGGGTCAACGCCGATATGCTTATGGACATCTTTGTGCAAAAGCTGGCGCCCGGCGACACCCTGACTCTGGAAGAAGCAGAAAAAGAGTGTGCCGTGCTGCTGCTGTCCGGCCAGGTGACCTTTGCCGTAGGCAACAGCATAAACGAGACCTGCAAACGCAAAAATCCATTTGAAAAGAAGCCCTACGCCGTGCATTTTTGCCGTGGCACAAAAGCCACGGTTACTGCCAAAGAAGACAGCCAGGTTTTGGTGCAAATGACCGACAATGATCGCACCTGGGCGCCGGAATTCTACCACCCGGGCAACTGCCTGTACCAGGAGTTCGGCAAGGGTCAGTGGAACGGCACCGGGCACCGGATCGTCTCTACTATGTTTGATTTGGACAACGCCCCGCAGTCCAACTTGGTGATGGGCGAGGTGTTCAATCAGCCGGGGCGCTGGTCCTCTTATCCGCCCCACCACCACCCCCAGCCGGAGGTGTACTACTACCAGTTTGACCACCCGGAAGGCTTCGGCGCCGGGTTTGAGGGCGACACCCCTTATAAAACACAAAACGGTGACTGCCTGTGCATTCGAGGCGGCAACGCCCACCAGCAGGTCACCGCTCCCGGGTACGAAATGTATTATGTATGGCTGATCCGGCACTTAGACGGCGACCCGTGGGACAAAACCAGAATCTATGTGCCGGAATATGAGTGGCTTGCCAATGCGGACTGAAGAAAAGATCATTGAAAATTATACAGAAATTCCTGCCCTGCTGAAGAACTGCGGCGCTCGGCGCCCCTTTCTCTGCTGCGGCAAGAGTTTTGAAAAGACGGACGCCTTTGCCTACCTGCAAGCACACTGCCGCCTGACAGTATGGGACACGGTGCGCCCCAATCCCCGCTACGAGGATATGGTGGCAGCAGCCGAATTATGCCGCAAAGAAGGCTGCGACTTTATCATCGGCGCCGGCGGCGGTTCGCCCCTGGACAGCGCCAAAATGATCAAGCTGCTGATCACCAACCCGGGCGTGGTGGGCTACGATGCCGAACTGCGGGACAATGACATTCCTTTTTTAGCCATTCCCACCACCAGCGGCACCGGCAGTGAGGCCACTCGGTACTCTATCTTTTATGTAAACGAGGACGAGAAGCACTCTGTCAGCCACCCCGGCTTTCTGCCCGGCTATGTGCTGTTGGATCCCTGCTTTTTGCAAACGGTACCGGACTACCAACGCAAGTGCACCTGTCTGGACGCCCTGTGCCACGCCATAGAAAGCTATTGGAGTGTGCGCAGCACCCCGGAAAGCCGCACCTATGCCCAAAAGGCCATTCGCCTGTATTTTGAGCACCTGGACGGCTATTTGGCAAACACCCCGGCAGGCAATGCGGGTATGCTCCGCGCCTCCTACAACGCCGGGCGTGCCATTGATTTTACCTCCACCACGGCGGCCCACGCCATGTGCTACAACATCACCATGCACTGCCACACCAGCCACGGTCATTCCGTTGCCGCCGGGCTGGCGGAGATTTGGGACTATATGCGCACCCACAATGACCGGGTGAACGATCCCCGTGGTCGGGACTATGTGCTGGATAGCTTTGACCGAATCGGTATTCTGATGGGCGGTCAAAACGGTACGGACGGTGTCGCCATCTTCCGTTCCCTTCTGGAGAGAATGGAATTACAGTCGCCTACTGCCACGCCGGCGCAATGCGCCGCCTTTGCCAAAAAGGTGGACATCAACCGACTGGGCAACAACCCCACCAAGCTGACGGTAGAGGATGTGGAAGCCCTGTACCGCAAGATCCTGGTGCATAAGTAAAAGATAAAAGCCGGGTGGCTGATGGATAAATACACGCACTACAAAACCAAAGGACCGTACACTGTACGGTCCTTTTTACATTTACAAATTCTATTACAAATCAAATTTGGCGGCCTTTTCAAACCCGGTTTTCACATCCAGTAGGCAGTCGTAATTATACCAGGGAGCCTCCCGCTCGATCATTTGCAGCAATGCCGGGCAGATCTCGGCATCCAGAATCCACTTGGTAACTTCAAAATCCTCCCGAATATTCTTGGTGGGATAGCCATTGAACATTAGGGAAAAATCCGTCAACAGCAAAAACACACCCTGCTGGTAGCGCATCAGATCATTGGTTGGAATACCGATCAGCTTGGCGCTGGGCGCGTTGCCCATTAAAACCATATCTTGGCGCTCCCGCTCCATTTGCCGCAGCATTTGGCGCAGCCCGGCGGCGCCGCTTTGCATCAGGCTCTTAATGTAATCCTCCCGACGGCGGAACACATACACCTTGTAATCCTCCAGCCAGGCATTCGCCGTAGCTAAGGACTCGGTATAATCCCCTTCGTCCCGAATTTTTACCGTATAAAGCGCCAACGGCGCCGGATAAACCTGCCGGTTCTTCAGCGCAAAAGACAAAGAAACATACAGACTCTTGGTAAAATCCACAAAGGGCGACACATCCAGATAATGCTGGGAAAAAGCAAACAGCCGATACAAATTTTGCCGCGGATGCGGATCCATCACCTTCTCATACAGGTGCATATAGCTGCCGTCCCGGCCGTAAAAGTCATACACAAAATCCGCCGTCACCTTGGCCACCGCATCCCCATTGTCAAACAGTGCCTGCCGGTTGCGAAAAATGGTGGGGATCAGCGGTCGGGCACGATCGTCCACCCGCTCGCCGCGGTAGAAAATCTTTTCTTTGTTCTCCAAAAACGGCGCTTTCAGCTGCTGCTCAAATTCTTCCATTGTGTGCACCTCTCGGCGCACCAGAGAAAAATCCACATCCAAAGCGTCAATGACCTGCGCCTCCCACTCGGCAAACTTATCGTCTGCAAAGCGGGTGCGCAGGTCTTTTTCCGTTTGTTTCGCTTTTTCTATAAAGTGCATCATCAGTGGGTATTGTTGTTAATGGTCTTGTAGTCGATATATTGCTGACCGGCTTGCGGTGCCTTGCCTGTTTTGGCCTGGATCATCTCAGACACCGTCACAATTTGATAGCCCTTTTTCACCAGCGCCGGTACAATTTTCTCTACCGCATCTGCGGTGGTGGAGTAAATATCGTGCATCAGGATAATGCTGCCGTCATAGGCACCGTGCTCTGCCTGACTGATAATTTGCGCCGGATTCCTTGATTTCCAGTCCTCTGTATCTACCGACCAGTAGGCAATGATCATGCCCTCTTTTTTGGCAGTGTTCTGCATGACGCTGCTCATATTGCCGCCGGGGCAGCGGAATGCCGTGGGCCGCTTGCCACAGGCCTTATATACAGCATCTGAGCACTTGACCACATCCGCCTCCGTCACCGCCTTGCCGTAGTGATCGTGATTGTAGGTGTGGTTGCCCAGCTCACAGCCAAGCTCCAACTCGCGCTTCAAGTACTTCTTGGTGTTGTCATTGATTCGCGTACCCACCATAAAGAAGGTGGCGCGGGCACCGTACTTCTCCAACACATCTAAAATGCGGCCGGTAGAACCGTCAAAGGCCGGGCCGTCATCAAAGGTCAGGGCCACCATCGGCTTGTCCTTATCAATATTCGCAGGCAGTTTCACCGTCTCCGCGATCTGTATACGCTTAACCTCGCTCCAGGGTCCGTACTTGGTGCTGCTGCCCACAGCCATGCTGCCGCGCATACGCACATAGTAGGTGGCCTTCTCCGTCAGCTTCTCCAGCACTGCACTGTTTTGACCGGCCTTAAAGTCCATGGTCTGCGCACCATCCGCGCTGAAATCCTTATCCTTTGCATACTGCAGCTGATAGCCCGCTGCTCCGGTATCCGTAGACCAGCGCAGGTTCATAGACCCCTCCGACAGGGAGGACGCCTCCACCTTAGGTGCACCGGGCAAAGTGTATGCCGTCATCTCCGGGCTGAAATCACCGGTATATTCCTTGTCTCTGTAAATCTTATATGCCCGCACCTTGTAGCGGTACACAGTGGCCGGCGTTAAATCCGTCAGCTGCACACGTGTGTTCTTTTTGCCATCCACCGTCTTAACTTTATCAAAGGCCTTTTTATCGCTTACGGATTGAAAAATCTGATACCCATCGGCACCCTTGACCCGGTGCCAACGCAGGGTGCAGTCCGTCTGCCGACCCTCTTCGATGATCTCCAGCTTCTCCACATCCCCCACCGTCTTGGCCTGAACCACAGACACGGCACCAAAGGTTGCGATTAAAATTGCCAAGACCAAAAACAGTGCCGTCACGCGCACTTTGTTTGCCATAACCAGACAACCTCCTCTCTTATAATCAAGTTGATTATATAGCACCCGACACAAAAAGGCAACAGAAATTTGTAACTAAATTGTCACTCTTTTTTTGCCTTTTCTTGTGCATTTTACCATTGGTGTTTTTTGCCGTCAAAAGCCAAACAAAATTGCCGATTCGTCGTCCATTATTTTTTCCTTATTGACCGGTGCTTTCGTTCGTGTTAATATTATAATTATAATATTATAACTTATGCAAGGAGAAAGACGAACACCATGGAACAGATGCAGATTTTGCTGGCGATCCTGGTACTTCTGCCCTTTGTCAGCGCCCTGTTGCTGGCACTGTGCGGCAGCGACCGTATGCGCCGGCTTATCGTCTATGGCAGCGCCGGCGTGCTGATGATCAGCGCCGTGGCCTTTGCCGTGTGTTTCTTCTCGGGGGAGAATTTGCAGCTGCGCTTTTTACAGAGCGGCGGGATCATTGACCATACCATGCTGGCGCTGGAGGCCGGCTTTGCGGTGCTGATTACCGTCCTTAGCATCAAGTACCGGCGCTACTATGTGGCGGTGCTGTCCATTGTGCAAACCGTGCTGACCTTTGTGTATGAACTGGGAGGCTATAAGCCTGCTGTACAGCCCTACAACCTGTTTGCAGACCAACTGACCGTGATTATGGTGCTGATCATCGCCGTTGTAGGCACACTCATCACAGTATATGCAGTCGGCTATATGCGCGATTACCATAACCATCATAAGGAATATGCCGATCGGCGTCGCTTTTTCTTTGCCATGCTGTATGTATTCTTAGGTGCCATGTTTGGTCTGGTGCTGTCCAACAGTCTGTTATGGCTCTACTTTTTTTGGGAGATCACCAGCCTTGTGTCCTTCCTGCTGATCGGCTACACCCGCACCAAAGAGGCGGTGCAAAACAGCTTCCGTGCCCTGTGGATGAATCTGCTGGGCGGACTTGGATTTGCAGCAGCCATCTTTTGGGCAGGGGTGCGCTTTGGGATCACAGACCTGCAAAGCCTGATCCTGTGCGACGGCAAGCTGGTGGTGGCGCCGGTGATTTTGCTGGCCTTTGCTGCACTGACCAAGAGCGCACAATTGCCTTTCTCCCGCTGGCTGCTGGGAGCCATGGTGGCGCCCACGCCCTCCTCTGCACTGTTGCACAGCGCCACGATGGTAAAGGCCGGTGTGTACCTGCTGATCCGCCTGGCGCCGGTGATGTACGGCACCTATGCCGGCTCTATGGTGAGCCTGGTCGGGGGCTTTACATTCCTGATCACTTCCATGCTGGCCATTACCGTCAGCGACGGCAAGGCTGTGCTGGCCTACTCTACCATCTCCAACCTGGGACTGATCGCCGCCTGTGCCGGTGTGGGCCGACAGGAGACGGTATGGGCCGCTGTTCTGTTGCTGATCTTCCACGCAGTATCCAAATCCCTGCTGTTTCAAACAGTGGGTGCCATTGAGAACGCCACCGGCAGCCGGGATATTGAGTCCATGCACGGACTGATTGCCCGGCACCCACGCCTGGCGCTGACCCTTTCCATCGGCATTGCCGGTATGTTTCTGGCGCCCTTTGGCATGCTGATCTCCAAGTGGGCGGCGCTAAAAGCCTTTGTGGACAGCGGCTCCATTATCCTGGTGCTGTTTATCTGCTTCGGCTCCGCCACCACTCTGTTTTACTGGACCAAATGGGTGGCCACCGTGCTTTCCTGGAACCGAAAGGACACCCGTCAAAAAAACACAACCTCCGGGGATCAGTGGACTTCTCTGCTCATTCACTCGGCACTAATGGTGCTGCTGTGCTTTGCATTCCCGGCAGTGTCTAAATTCGTGGTTACCCCGTACCTGGCCGGTGTGTACGGCCACGCCTCGGCGGTGCTGTCCAGCGACAATATTCTCATTATGATCATTATGCTGGTGCTGATCTTTGTGGTGCCTATGGTGACGATGATTCTGCTGCGCCGCTCTCACATTACCTTTGAAGACACATACCTTGCCGGCGTGAATACCGGCAAGCAGACTTATTTCTATGACGCCATGGGCGAGCCTAAGCACTCCTGGATCACCAACTGGTACTTGACCGACCTGTTCGGTGAGACCAAGCTGCGGAGCCCCAGCGTGGTGCTCTCCACGGCAGCCATCTTGATTTATACCGTCATTGCGTTAGGAGGTGCGGTGCGATGAGCAATGCTGCTGTTGCCGCCATCAGTGTGGCGCTGTATATTCTGCTGGCACCGGGCGTGGGCGGTCTGCTGCAAGGTGTGGACCGCAAAGCCACCGCCCGTATGCAAGGGCGCCAAGGTCCGCCGCTGCTCCAGTCTTTCTACGATGTGGGCAAGCTGCTGGGCAAAGAAACCAAGTATATGAACCACATTCAGATCGTCTGCCATGTAAGCTTCTTAATTTTCGTTATTTTTACCGGAGCGCTGTTTTTCGGCGGCGGAGATCTGCTGCTGATCTTTTTTGCTCTGACCACCGCCAATCTGTGTCTGATCCTGGCGGCCACCACCTGTAACAGCCCCTATGCGGCGATGGGTGCCAATCGGGAGATGCTGCAAACCATGGCCTATGAGCCTATGGTGCTGCTCACCGCCGTTGGCTTTTATCTGGCCACCGGCAGCTTTAAGGTCAGCGACATTGTGCGGTCAAGCGGCCTGCCGCCCATTGTGTACCTGCCCGGTGTGTTTTGCGGGTTTCTGTTCATTCTCACCATCAAGCTGCGCAAGCACCCCTTTGACCTGTCCACCAGCCACCACGCCCATCAAGAGATGGTCAAGGGGCTGACCACCGAATTTAACGGCGTAACCCTCCTGATTGTGGAGGTGAGCCACTGGTATGAGAACGTATTTTTAATGGGCATTATCGCCCTGTTTTTCATCAACAGCAAGCCCTGGAGCTATGCGCTGGCAGCGGTGGCCGTGGTGCTGTCTTACTTTTTGGAGATCCTCATTGACAACACCAACGCCCGCCTCAAGTGGCAGCGTATGTTCAAAACCACTTGGGCGGTGACCATGATCATCGGGGTCATCAACATCTTTGTTTTACAAGTGCTAAAGGGGGTATAAGTATGCCGAATGTAACCAAATCGCCGTGGATTATGCACTACGATGGCACCTCCTGCAACGGCTGCGACATTGAGGTGCTGGCCTGTTTGACCCCCCTCTATGATGTAGAGCGGTTTGGGGTCATCAACACCGGCAACCCCAAGCACGCGGATATTTTGCTGATCACCGGCTCCGTCAACCACCAAAACGCGCCGGTCGTGCGCCAGATCTACGAGCAGATGAACGAGCCAAAGGTGGTGTGCGCCATTGGGGTGTGCGCCTGCAACGGCGGCGTGTTCAAGGACTGCTACAATGTGCTGGGCGGGGTGGACAAAGTGATCCCCGTAGATATTTATGTGCCCGGGTGCGCCGCGCGGCCGGAGAGTATTATTGACGGCGTGGTGCAATCCCTGGCACTGCTGCAAGAAAAAAGCGAACGCCGAAAGGAGGCCGCAGAATGAACCCAAGCTACACCATAGAAGATGTGGACATCAAGACCCTGTACCGGATGATGCTGGAGCACCTGCGCGCCGGCTTTCGGCTGGTACAGATCGGCGCCACCGGAAGAGAAGATGGCACGGAGCTAATCTATTCCGTTGCCAAGGACTACCAAATGGACAACTATCGGGTATTTGTGGAGTCAGGTGAGATCATCAACTCCATCTCGGATATTTTTCCCTCCGCGGCGCTGTTTGAAAATGAGATTGCCGAGCTGTTCGGGGTGAATATTGACTGTATCAACCTGGACTTCCACGGCAAATTTTACCGAATAGACAAAGAAACGCCCTTTTGCAAGGCCCCTATGGGTGAGAACGTAACCATCGTAAAAAAAACGGAGGGAGGTGCAGAGAATGGCTAATCGCACCATCGTGCCCTTTGGCCCTCAGCACCCGGTGCTGCCGGAGCCTATTCATCTAGATTTAGTCCTGGAGGACGAAAAGGTGGTTGAGGCCATCCCCTCCATCGGCTTTGTCCATCGGGGACTGGAAGAACTGGCCGGTCGTCGGGACTTCCATGACTATCAATATGTGGTAGAGCGCATTTGCGGCATTTGCTCCTTTAAGCACGGCATGGCCTATTGCGAGACCCTGGAGCAGATCTTTGGCGCAGAAGTGCCGCCCAGAGCCAAATATCTGCGCACCATTTGGGGCGAGATGAGCCGAATCCATTCCCATCTGCTGTGGCTGGGTCTCTTGGCCGACGCCTTTGGCTTTGACGCCCTGTTTATGCAGTGCTGGCGTATGCGGGAAAAAGTGCTGGATATGTTTGAGGCCTCCACCGGCGGGCGCGTGATCTTTAGCGTCAACACCATCGGCGGCGTGCTGAAAGATATGGACAGCGATATGCTCAAAAGCTTTGTTGCCATCTTTGACGATATGGAAAAAGAACTGCACAGCCTTGCCCATGTTTTTTTGAACGATTACAGTGTGCAAAGCCGCCTGCGGGGCGTTGGCGTGCTCACCAAGGAGCAGGCGCTGCTGTACGGCGCCGTAGGGCCCATGGCTCGTGCCTCCGGCATAGAGATTGACACCCGCAAACTGGGGTATGAAGCCTACGGCGATGCGGAATTTGACATCATCACCAGCACCGACTGCGACGGCTACGCCCGCTGCCGGGTACGCATTGGCGAGCTGTTCCAGTCCATTGGTATTATCCGCCAGCTGGCAGCCAAGGTGCCCGACTCCCAACTGACCGTGCCCATCAAGGGGATGCCCAAGGGCGAGGCCATTGTGCGGGTGGAGCAGCCGCGGGGCGAGGCGTTCTATTATACGAAAGCCAACGGCACCAAGTTTTTGGAGCGCTTTCGTGTGCGCACCCCTACCTTTACCAATTTGTATGCACTCCTGCACATTTTGCCCGGCAGCGAGCTGGCAGATGTGCCGTTGCAGATCCTAACCATTGACCCGTGCATCAGCTGCACGGAGCGGTAAGGAGGTTCTTATGGCATTTATGGATTTTACCCGCACGGCGCTGAAGAACCTGTTTTCCAAGCCTGCCACCCGGCAGTATCCACAGGTGCCCCGGGAATACCCGGCACGCAGCCGCGGCCATGTGGAAATTGATATGGACGCCTGCATTCTCTGTGGGCTGTGCAGCCGCAAGTGCCCCTCCGGCGCCATTACCGTGAACCGGGCTGCCGGTACTTGGAGCATTGACCGTATGGGCTGCGTGCAGTGCGCAGACTGTACCACCGGCTGCCCCAAGCACTGCCTGCAAATGCAGCCGGGCTACACCCCGCCGGGGCCGAAAAAGCTGGTGGATGTGTACCAAAAGCCCCAGCCGGAGCAGAAAGAAGAAGCGGCACCCCAAGGCGGCAAGATCGTCAACGATATGGAGAAGTGCATTCTCTGCGGCCTGTGTGCCCGCAAGTGCCCCCAGGAGGCTATCACCGTGGACCGGAAAGAAAGCCGCACCTGGGTCATTGACCGCAGCGCCTGCGTGCAGTGCGGCGCATGTATTGATGCGTGTCTCAAGTTTCACGCCCTGTCCTTTGCCCCGGACGACGGCGCTGCCGGCACGGAAACCTATACCAAACCCGTATGATCACGAAAGAATATATCTTTAGCGGCATTGTGCAGGGTATGGGCTTTCGCCCCACCGCCCTGCGACTGGCTACGGAACTGGGAATCACCGGCACGGTGTGCAACACCGGCGGCCGGGTGACCCTCACCGCCACCGGAGAGGGCGCGGCGCTCACTGCCTTCGCAAAGCGGCTGTGCCGCGCCTTTTCCATCTACCAATATGAAGTGAATGAGCTGCCGTTCCAGCCATTTCAGGGCTTTGCCATCACCCACAGCCGTCGTGCCCGGGGTCTGCCTTTTCTGCCCCCGGACCTGGCCACCTGTCCGGACTGCCAACGAGAGTTGCTGGACCCGAAGAACCGGCGCTATCGGCACCCATTCATCACCTGTATTCACTGCGGGCCGCGGTACACGGTTATGAAGGCCCTGCCTTATGACCGGGAACGCACGGTGATGGGGCGCTTTCCCCTTTGCCCGGACTGCCGGGCGGAATACACCACCCCCGCAGACCGGCGCTGCCACGCCCAAACCATTGCCTGTCCCCACTGTGGACCGCAGCTAACCATGGACATAGAGACAGCCGCCCAACTGCTGCGGCAGGGAGAAGTGGTAGCCGTCAAAGGCATTGGCGGCTATCACCTGTGCGCCAACGCTGCAAATCCGCCAGCCGTGGCAAAAATACGGCAAATCAAGCACCGGGGGCAAAAGCCCTTTGCGGTGCTGTTTCGCAATATAGAAGAAGTACGGCAGTATTGCCGGGTGAGCCAGGCAGAGGAGAAGCTGCTGCTGTCTGCTGCCCGACCCATTGTACTGCTGCATAGCAAGCGACCGCTGCCCACAGAGATCACCTGCGGCAGTGACCGGGTGGGGGCGTTCCTGCCCTGCAATCCGCTGCAAATTCTGCTGCTGGAGGCGATCTCGCCCCTGGTGGCCACCAGTGCCAACATCAGCGGCGCGCCTATGTGCACAGACGATACACAGGTGCAGCAGTTCGGCGTGCCGGTGCTGGGTCACGATCGTCCAATTCTGACCCCTATCGACGACTCTGTACTGCAAGTGACAGAGGGCAATCCTGCCTTTATGCGCCGGGCGCGGGGCTATGTGCCTTTGGCCGTTGAACTGCCCTTTGCCGCCAAACAGACCACCCTGTGCCTGGGCGGTGATCTGAAAGCCACCTTCGGCTACCACGCCGGGCGCTATGTGTTTCTGTCCCAACCCTTTGGCGACCTGGAGCACCCGGACTGCCTGGCTGCCTATCAAGAAAATATAGAGCGCTTCGCCGCCCTGCACGGCTTTACGACAGAAAAAGTGGTAGCAGACCTGCACCCGGGCTATACCGCCCGCCGGTTTTGTACGCCGGATATGCAGGTGCAGCACCATATTGCCCACGCTGCCGCCGTATTGGCAGAGCACCAACTGACCGAACCGGCTTTGTGCTTTGCCCTGGACGGCACCGGCTACGGCACCGACGGCCAAATTTGGGGCAGCGAGGTATTTGACTTTGACGGTGGGCGCTTTACCCACCTGGGGCATCTGCCGCCCTTTACCTGTCCCCCCGGAGACAGCGTGGCAACGGACGCCCAACTGTGCCTTAGCTGCTATCTATGCACCCAACCGCTGGTGAACCGAGCGAAAGACGCCGGCGTACCCCTGCTGCAAAACAGCAGCGCAGGGCGCCTGTTTGACGCTGCGGCTGCCGTCCTGGGGCTGTGCGATACCAACACCTATGAGGGGCAATGCGCCGCCGCGGTAGAGCAAGCGGCTCGCCGGGCAAGCGGCGCTTATCCTTTTGACCCGGCCTGCACCCCGCGGGAGCTGCTGGAGGAAATGCAGTGCCAAAGGGCAGATGTGCCTGCCATGGCACTGGGGCTGCACCACTGGCTGGCCCGGTGGATCCTGAACCAAGCCCAAGCCTACCGACGCAGCACTGTGGTGCTCTCCGGCGGCTGCTTTACCAACCAAATTTTGACCCGCTGCACGGCAGATCTGCTGCGGCGCAACGGCTACACCGTTTATACCGCCTGCAAGGTGCCCCCCGGTGACGGAGCATTGGCACTGGGACAGGCATATATATCGGCACTGGAGGAATGACTATGTGCGTTGCCGCTCCCGGCAAAATTTTATCCATCAACGGCACCACCGCCACGGTAGCATACAGCGGCAACCGGGTGCCTGCCAACCTGGGCGTTGTCAAAGCCCAAGTGGGCGACTGGGTGCTGGTGCACGCCGGGCTGGTCATCCAGGTGCTCAGCGAAAGCCAGGCCCAGGAGATAAACAACCTGTTGGCAGAACTGGAGACCCTGCTATGAACCTGCCGAACATTCGCCGGGCGCTGGCCGACTACCACGGTCCGCCCCTGACTTTTATGGAAATTTGCGGCACCCACACTGCCGCCATCAGCGAGAACGGCATACCCGCCATTTTGTCGCCCCATATTCACTTGATCAGCGGTCCGGGCTGCCCGGTGTGCGTCAGCGTATCAGCCTATATTGACCGGCTGTGCGACTTGGCAATGGAACCGGGTATGTGTGTGTGCACCTTTGGCGATCTGCTGCGGGTGCCCGGCAGTACCCGGGCGTTGGAGCAGTGCGTAGCTGTGGGCGGGCGGGTGCAAATGGTCTATTCTCCGCTGGAAGTGCTGTCTCTTGCCAAGGCGGAACCGAGCACCCGGTTTGTGTTTGCCGCCGTGGGATTTGAGACCACCGCCCCGGTGTATGCGGTGCTGGCAGACACCATTATGAAAGAACAGATTCCCAATGTGCAGCTGCTGACGGCGCTAAAGACCATGCCCCCGGCAGTGCGTGCCCTATGCAAAGGCGAAACGAAGATTGACGGTTTCCTGGCTCCCGGCCATGTGGCGGTAATCACCGGCGAGGGCCCCTGGCATCAACTGGCTGCGGCGCAAGGTCTGCCCTTTGTAATCAGCGGCTTTACCGGGGAGGAGTTACTATGCAGCCTGTACGCGCTGGTTCACTTAGCCGGGCAAGGTGTGTGCAAAAACCTCTACCCTGCCGCCGTTCGACCGGAGGGCAACCCTGCGGCCCGAGCGCTGGTGGACCGATACTTTGAGCCTACAGACGCCGCCTGGCGGGGACTGGGTATTTTGCCCGGCTCCGGACTGGTGCTGCGCCCCCAGTACCAACATTTAGACGCCGGCAGTGCCCAACTGACCACAGACGCGGCGGCCCAAAGCGGCTGTCGGTGCGCGCAAGTGATCACCGGTGCAATCCCTCCAACGGCCTGTCCCCTGTTTGGCACGGCCTGTACCCCCGGCACCCCACGGGGCGCCTGTATGGTGTCCGGTGAGGGCAGCTGCCACAACGCATATCTTAATCACAGGATGTAACCTATTATGAACATTGCTATTTTTGACTCCGGTATCGGCGGCTTGTCCGTTCTCTACCAGGCAAAGCGTATGCTGCCGGAGGCCCATTTTTTATACTATGCCGACGAGGATCATGTGCCTTATGGCGAAAAAACCAGAGAACAAATTTTAACTTACACAGATGAAGCGGTGCGCTTTCTCTTGGACCGGGGAGCGGACGCCATTGTGCTGGCGTGCAACACTGCTACCAGCGTGGCGGCAGCCACCCTGCGGGATCGCTACCCCCTGCCCATCATCGGCATGGAGCCGGCGGTCAAGCTGGCGCTGAATCAAGACGATACCCACCGGGTGCTGGTAGCAGCCACACCCATCACCATTCGGGGCAACAAGCTGAAATGCTTGGTAGAGCACTATGACGGCCACCACTTGGTGGATCTGCTGCCTTTGCCCGGACTGGTGCGCTTTGCAGAAAAAGGCATTTACTCCGGTGCCCAGGTACACGCTTATTTAAGCGAGCAACTGGCCGAATTCAACTTGGAAGATTACGCCGCCTTTGTGCTGGGATGCACCCATTTTAATCTGTTTAAGCAGGAACTGCGCACCTTGCTGCCGCCCCAAATGCACTTTGTAGACGGCAACGCCGGCACCGTGCGCCAGCTGATCCGCAGAACGGTTGACCTGCCTGCCACTCACGGGAGCACCCCGGGAGTCACCTACTTTGCCTCCGGGCGGCCGATCACCGACCCGGCACAACTGCAATTTATTCAAAATGTGCTGGCGCATTTAGAGAAGATGTATCCCATAGAATAAAAGGAGCCGTTATGGAAATTACCCTTGCCCACGGCAGCGGCGGCGCGGCCACCGGAGAACTGATTCGCACCGTGTTTGCCAAGGCTTTTGACAATCCCATTCTGCGCCAAATGGACGACAGCGCCGTGGTGCCCGGCAGCGGGCAGCTGGCTGTTACCACAGACAGCTTTGTGGTGCAGCCCTTGTTTTTCCCCGGCGGCGACATTGGACGCCTGGCGGTGTGCGGCACCGTCAATGACCTGCTGATGCGTGGCGCCACACCCAAGTACCTGACCGCCGGTTTTATTTTGGAGACCGGATGCACCACGGAGGACCTGAGCCACATTGCCCGGTCTATGGCAGCCACCGCCAATGAAGCCGGTGTGACCATCGTTGCCGGCGACACCAAGGTGGTAGAGGGCAGCGGCAATATTTATATCAACACTGCCGGCGTGGGCTTTTTGCCCACCGACACACACATTGCCGCCACTGCGTTACAACCGGGAGACGCTCTGCTGGTCAGCGGCGCCATGGGCGACCACCACGCAGCCATTCTCTCTGCCCGCATGGGCATGGACAATACCATTCAATCCGACTGCGCCCCTCTGGGCAATATGGTCACCGCCCTGCTGCAAGGGGGCGTTGAAGTGCACACCTTGCGGGACATTACCCGGGGCGGCCTGGGCACCGTACTGTGCGAGCTGGCAGAGGCGGCAAACTGCGGCATAGAGATCGACGAAACGGCGATCCCGGTGCACGAGGATGTGCGCGCCTTTGCCCATATCTTAGGACTGGAGCTGCTGCACATGGGCAACGAGGGCAAGCTGCTGGCTGCCGTACCTGCCCACCAGGCGGATCAAGCGCTGGAGCTGCTGCGCGCCAGTCGCTACGGTGCAGAGGCCGCCGTCATCGGCACCGTAACGAACGGAGAGGGCGTAGTGGCACTGACTCCCATTGGCGGCAAGCGCCGGGTCAGCGTGCTGTACGGCGAAGGTTTGCCCAGAATTTGCTGATTTTGATTTTTTAAAGGAGTTTTTTATGATCTTGTACTACACCGGCACCGGCAACAGCCGCTATGCGGCAAAACTGCTGGGGCACCGGCTGAACGACACGGTTCGGGACTGCACCCCCTTTATTCAAGGCGGCACCACACCCCGGTTCCATTCCGTAACTCCATGGGTATTTGTTTGCCCCACCTATGCCTGGCAGATCCCCCATATTTTTGCGGATTTTCTGACCCGATGCCATTTTTCCGGCAGCAGGCAGGCATACTTTGTAATGACCTGCGGCGGTGAAATACACAACGCCCCGGAGACAAACCGGAAGCTCTGCACCCGACTGGGGCTGGACTATATGGGCACAGCAGAGATCGTTATGCCGGAAAATTACATTGCCCTGTTTTCCACCCCAAACTCGGCGGAAGAAGTGAACCACATTCTTGCCGCTGCGGTGCCTGCGCTGGAGCAGACCGCTGCTGCCATAGAAAGCGGCTGTCCGGTAACGGAACCGAAACCCACGGTGTTCGGCAAATTTATGACCTATATCGTCAACCCGATTTTTTACGCCACCTGCGTCCATGACCGGGCGTTTACGGTGGACGACACCTGCATCGGCTGCGGCAAGTGTGCCAGCCTGTGCCCCATGAACAACATTGAACTGCAAGGCGGCAAGCCTCGGTGGAACGGCCACTGCACCCACTGTATGGCCTGCATCAGCTATTGCCCCAAGGCAGCCATCGCCTACGGCAAAAAGAGCCGCACCCGCCGGATCTACACCTGCCCGCCCTATCGGCCGGCAGACCGATAATCACAATTTTCAAATCAACCACCGCAAAACAACAGAATGAAGAATGCTCTTCTTAAGTTGCTTGCTATGTCTCTCTCTGCTTTTTCTTTATCCCCTGTCGTTCATGCAGAATATGGCAGAATATGAAAAGACAAATGGCTGATATAAAATTTTCATGGAAAGAAACAAATCATTTACAGCAAATAAAAAATCGCCACCCGGGAAGGTGGCGATTTCTCATTTACAAAGCGCTTTGCACATATTAGGTGTTTCAATCAATCATAATACTTGTCCAGTTCCGCATCGCAGGCAGGGTACTTTTTGATTTGCGGATGGTCGTAAACCTTGCCGCGAGCCACCACCATATATGGCTGCTCCAGGGCACGGAAGTCTGCCAGCGGGTCGCTGTTTGTGATGAGCAAGTCGGCGCACTTGCCCACCTCTACGCTGCCGGTCACATCCCCAAGCCCCAGAATACGAGCGTTGTTTAATGTGGCGGTATAGAGCGCAAACTCCGGTGTTACGCCCACTTCCTTTTGGAAATAATGCAGCTCACGCCACATATTGTAATGGGTGGTGTACGGGCAGCCGGTATCTGTGCCCATACCTACCGGCACGCCGTCTGCCAACGCCGCTCTGGCACCCAGGATCATATTGTTATACACCAAATTGGAATTGTACTGCACCGCCTCGGTAATGCCCAGAGTCTCTCTTTGAAACTTGGCCATGGGCAGCGCCGGAGACAGGGTGCACACCAACACCGCACCGCTTTTATGGAAGGCAGCCAGCTCCGTCTCTGACAAAGTAGAGCCATGCTCAATGGAGTCCACGCCATTGAGCACCGCTGTGCGTACCCCCTCCGGGCTTTGCACATGAGCAGCCACCTTCAGACCATAGCTGTGGGCACGGTCGCAGCAAGCCTTGATCATATCCGCCTGCATCATCAGCCGACCCGGCTCGCCTTTCACCTTGGCGTCCATCACGCCGCCGGTGATCATCAACTTAATCAGATCCACATTTTGGCCGTGAAGCTGATCTACCATGCGCACTGCGTCCTCCACCGTCTCTGCCGGGTGGGTCACGGAGCCTACCATATGGCCGTGGGGCACACCGATGGCATAGTTGGCTACTAACATTCGCGGACCGTCCAGCTTGCCGGCATGGATCCGATCCCGCAGCCGGGTGTCCAAATTATCCAGACCGCCCACCACGCGCACCGTGGTCACACCGGACAGCAGTCCCTGCATGGCATAGGCGTGGCACATGCGCAGCACCAGCGCCCGGGACAAACCGGAGGACAAGGCGATTTTGGTTAGTCGATTGGTGTTCATGGGCTTGTTTTGGGGCTTGCCCCCCGCAGGCAAGTGCACATGTAGATTGATCAGACCGGGCATCAAATACTTGCCGGTCAGATCCACCACCCGGTCCCCCTTATTGGGTGTAATCTTGCCGATCTGTGCAATTCTGTCATTTTCTATTGCCACATCCGTGCCGGGGCGGGGCGACATCTGCTCCGTACCGTCCAGCAGCGTACAATTTTGAAATATCGTTCGCATAAGGTTCCCCCTCCTTTGTTTTGATACTCTCATTATACCGAACCGACAACCAAAAGGCAACCGACCCTTTGTGGCTCTTTTGTTGCATAAAAAGCAATTTGCCGCTTTTGTCGCGCAAAGGAAAGCGCCGCGTGCTGCATAAAAGCAAAAGCACCTGTGTACCCAGTGATACACAGGTGCAGTTTTTATCCTGTTATTGCGCCACTTTGGCGGTCATGGCCTGTTGATAAAAAGCAAGCGCTTTATCAATGGCTGCCGTGCCTGCCGGTTCAAAGGGCTGTAACACGCTGAACACATGGGGCAGCGACTGGTTATACTCCGCCTTAGCGTAGTCCTTGATCTCTGCCTGCACCCCATGGGCTTGCAGCACTTCGTACAATCGATGGGTCTGTTTGTTAGCCAGGGTGTCGCCGCTGCTGGTGATCAAATAAGTAGGCGGCAGCGCCTGGGCATAGTCAATGATTTGGTCAAAATCCATGTACGGATAAGTGGCTTTGTCTTTGTAATCCGTGCCCCACATGGGCTTGGTGTACAGGCTGAACAGCCCGCCGTCCCGCATAAAGGCCACCGGCGAGGTAAGCAGCAGCGCCGTCAGCTCCATTTGCGGATTCACTGTGTCAAAGGTTTTGCGCAGCTGGGCACTTTGCATCAGCACCGCGCTGTATGCCGCCAGCTGCCCGCCGGCAGAGTCGCCGGTAAGCATAATATTTTGCATATCGCAGGGATATTGGCTGCCGTGGTCACGAATCCAGCGCAGCGCCCGGGCCACATCCTGCAACTGCTGGTTCACCGTCACATCCGGCACCAGTCGGTAGTTAATATTAAAAACCACATACCCCCGATCCGCCAGAGCGGCGCAGTAGTGGTGGTTCAGTCCCTTTTCCGCATACATCCAGCCGCCGCCGTGAATGTCAATGATCACCGGCAGCTTAGCACCGGGCTGTGTATCTGCCGGGTACAGCACATCTAATGTGTGATACAGATTGCCGTCCTCTATATAGGCCAGGTCGTTCACTTCCGTCACCGTAGGCGGATTCTGAGCCGCGTGCTTGGCTTTGTCGCCCCCGTCGCAGTAGCGCCACACCATCTGCATAATCTTCACCACCGGATTGCGCAGCAGTCCCTTGCCGCTGCCGTCGGCGTACTCCACGGTGTCTGAGGAGACCATACCGCCAATGTAGATCACATCGTCCGCAGTGTCCTTGCGGGGCAAAGTGCTCAGTTCAATAAACGCAATAGCCACCACAATCACCGCCAGCAAAACGCCGATCACCACAGCCCATACCTTCTTTCTGCTCTTTTTCCCCTTCGCCGCACCGGTCTGCGCCTGTACAGCCTTTTCCTTTGTTTCCATACCCATTCCCCCTAAAATGTCTATCCGCATTATACTCCATCCTGCCAATCCTGTCAATTTGTAGCAACGCTGCCAAAAGTCGAGAACAGCGGTATTTGCAATTTGGCAAGGGTTTTGGTATGATGAGAACAGAAAGCGGTCGGGTTTAGAGGCGCGATCGATGGACGGGGGTACGGGAATGAAACCGAAAAAGCAATGGGATCACAAGTGGTACACGGAGGAATTTTTGCAACAACTAAAGGCCACGGCGGCGGTGGAGATGGACGGCGATCTGCCCTACATCACCAAATATGCACCGGACGCTGGTTCGCCAAATGGGATTGACCCGCGGCTGCTGGGCGGACCCATGGGCAAAATGGCGCGGTCCACGGGGCTGGTGCCAAATTTCATTCTGGACCGGGTCAAGATCCCGGTAACGCCAAAGATCTTGGCCGGATTCCGTGCCGGGTGTGACCGTGTTTCCTACGCCAAATGCGTACAGGCAAAGATTGAAGTGCGGGACAGCACTGTACCGGCGGCGGACGGTTATCCCATTCCCATTCGCATGTACAACAGTGCCCAATGTGCGCCGGGCAGCCCTTGCCTGTATTTTATCCACGGCGGTGCCTTTGTAGGCGGCACTTTGCGCCCCTATGACGAGGGGTGGAAGCTGTTTGTAGAAAAGTTCCGCACGCCTGTGGTGGCGGTGGATTACCGACTGCTGCCGGAGCACCCATACCCCACGCTGTACGATGACTGCTGCCGCGTACTGGAATGGCTGGGCGGTGACGGTGCCCGGGAACTGCACATTGACCCAAGGGCCGTTTTTGTGGTAGGTGACAGCGCCGGCGGTAACCTGGCCCAAGGCTGCGCCACCCGCTACAAAGGCACCCACCGGGTGCGGGGGCAGCTGCTGCTCTACCCCACCCTAAACCTGTTTGGCACCACAGACCGCTACTATCACCCAAAAGAAACAGACTACCACCCGGCGCCGGGACAGCAAAAGCTGGCTATGGGACTGGTGCGGCAAATGGAGCTGCTCTCTCGCTCCGGCAAGTCCTTTTTAGGTATTCCGCAGCCGGACGATCTGTGCAATCCCTACACCTCCGACCCGGCTGGAAACCCGCCCACTTTTCTCTCCGTAGGTGCGCTGGACTACCTGCGCAACGACACGGTGGCTTGGGCCCACAAGCTGCACGACGCCGGCGTGCCCACCCGCCTGGTGATGTATAATGGTATGGGTCACGGCTTCTTAAACGCCATGGGCGTCTTTCCCCAAGCCGAGGACCTGCTGGACGAAATGGGCGCTTTTATCCAGAATGTCTGTAAAAATCACTAATCACCCTTGACCGGTATGTGCACATATCGGTCTTTACTTTTATCATCTGCAACACCGCAAAACGGCAGACAGTCCCAAATAACGGACTGTGTGGTCCGAACCGCTTGCGTACTGTCCCGGGCCATGTTATAGTAAGGACAAAGGAGGAAGATTATGGAATTTCAAATTGAATACCGTACAGAAACCACAGTTCAACTGGATTTGGAAAAGAGCCTAAAAATCTTTGAACAAAATCAAAAAAGCAATCGTCGATACCTGAAAATCATGCGGATTTTTCAAGATCCATCACAACCTTTGGACAGAGAATTTCAAAAGTTGTTTAACGGATTTTATCGTGTACGGCGCGGCACCGATTGGCAAGAAGCTTGCTATCACATTATGGAAATGCACCGCACCGACCCAAGCGTTACTTTCCCGCAGCTACTGAACGAACTGACCTACCATACCGGCAAAGTTGATTTTTCTTTTGCGACCAAAATACTGCATACCATCAATCCGCGTATGCCAATTTATGACAGCATCATTGCAACCAATCTGGCGCTGTGGAACAACTATGACGGTTCGGTCAATCGAAAAATGTGCAGAGCCATCGTCATCTACGATCAACTGCAACAGGCTTACCGGCAACTGCAAACCATGCCGGAAATGCTGCAATGCGTAGATGAATTTAGCCGCCGTTTTCCGGACTTTTCAAACATATCCACTTTGAAAAAAATAGACTTTTTGCTTTGGAGCAATCGGGAGGAAACAGAAAATGAATAACGAAATGAATGATAAAATACAAAAATTTTGTGAAGCATGGGCTGCCGTCGATGTCAGCGGAATTGACAGAATGAGAGCTCGAAGCAGGAAGCAGCGCCAACAGAAAAAGCAACGTAAATATATGCGCAGAAAACAGCGTCAGCTCAGATGTCTTGCCATTGGCATAGGCGTAAACAAAAGCATTCAAAAAATGATTGACAACGCTTAATCTCTACGCTGCGCAGGTTGCGCGGCGGGCATCTGTGATCAAGCGGCGCAAACAAAATCCACCTCTACTGCAACCGGGACGGTTTGAATGAAGCGCCGGTTGGGCGATAATCAGAACGAACACACGCAAAAAACAGCCATCACCGTAAAGGTGATGGCTGTTCGTTTGATATTTATGAGGCAAACAGGGATTATTTTTCTGCGTACTTGTCCTCGCCGTTCCAGGAATACAGCTTGCGGATCTCGGCGCCGACTTTCTCCAGCTGATGGTTGGCTTCCATCTCTCTCTTAGCCTTAAAGTGTGCCCAACCGTTGTTGCTCTCGGTGATGAACTTGGAAGCGAAGGTGCCGTCCTGAATCTCTTCCAGAACCTTCTTCATTTCCTTCTTGGTCTCATCGGTGATCAGACGCTTACCGGTCTCGTAATCACCGAATTCAGCGGTGTTGGAGATGGAGTAACGCATCTTGGCAAAGCCGCCGTTGTAAATCAGGTCAACAATCAGCTTCATCTCATGAATGCACTCAAAGTAAGCATTTCTCGGGTCATAACCGGCCTCAACCAGGGTCTCAAAACCGGCCTTCATCAGAGCGGTTACGCCGCCGCACAGCACAGCCTGCTCACCGAACAGATCCGTCTCGGTCTCGCACTTAAAGGTGGTCTCCAAGATACCGGCACGAGCACCGCCGATACCGGCGCCGTAAGCCAAAGCCACATCCTCACAGTGACCAGTAGCGTCCTGATATACAGCTACCAGACAGGGTGTACCCTTGCCCTCTTTGTACTCGGAGCGAACGGTGTGACCCGGAGCCTTGGGAGCGATCATGAACACATCTACATCGCTGGGAGGCACGATCTGCTTAAAGTGAATGTTAAAGCCGTGGGCGAAAGCCAAAGCCTTGCCGGCGGTCAGGTTAGGTTCAATGTCCTTCTTATAGATGGAAGCCTGCTTCTCATCCGGAGTCAGGATCATGATAATATCAGCGGCCTTTGCAGCCTCAGCGGTGGTCATAACCTTCAGACCAACGCTCTCTGCATGCTTCCAGGACTTGGAGCCCTCGTACAAACCAACAACTACGTCCACACCGCTCTCTTTCAAGTTCAGCGCATGGGCGTGACCCTGAGAACCAAAGCCGATCACGGCAACGGTCTTGCCCTTCAGGTAATCCAGATTACAATCTTCTTGATGGAAAAGTCTTGCTTCTGCCATTGTAGTTTCCTCCTAAAAAATAAGTTTAATTGAAGTCACAGTGTTGTATGATGTCTCTGTGGTTTCTTAACAATTCACATTATATCCTGTATGATGTCTGTTGTCAATAGGCAATTTAAATTTTTTATAGATGCTCCATGGCGTGGAGAATGTGCAGCCGCATGGCGGTGCGGGCGCCCTCGGCATTGCGTTTCTTAATAAAGTCCATAATCAGCCGATCGTCGTTTAGATTGTCAGCGCTTACATCCTTGTCCCGAGTCATGACGATCACGCCTTTTTTGATGGCATTGAAAATTACCGGCATAAACTGCTTCACAAACGCATTGTGCGTGGCATTGGCAATACTCTCATGGAACTTTTGCTCCTCTGCCGTGCGGTCCTCGCCGCTTAAGATCTTCTTTTCCACCTGCTCGCCGTAGTAGCAAATAGCATCAATTTCTTCCTGCGTTGCCCGCTTTGCAGCCAAATAAGCGCAATCCGGTTCAAACATCAGCCGCATCTCAAACAGATCGTCCAAGCCGGAAGCAATATCGCTCAGATCCGCCGAGTCGATCACCGTATTGGCACTGACAAAGGTGCCCTTGCCCCGCCGAATCTCCAACACACCGTTGGTGGTCAAAATTCGAATGGCCTCCCGCAAGGTGGAACGACTAACGCCCAACTCCGCCGCCAGGTCATTCTCATTAGGCAGCTTATCTCCCACCGTAAAGCGGTGCTGAGTCTCGATCATATTCAAAATCTGCTGCGCCGTACTCTCCGGCAGCATTGCCGATCTTGGCATATTCCTCACCTCTGCTCACATCATAACACAAGTTGTATGCAAAAGTCAAGGCGTTGTCTGACATCTTACAATTATAGAACTGCTTTTCCGCTGTTCTTTGTTCACCCTGCACGAATTTGCCCTGCGGGGGTTGTAAATTGTGAACAAATGCTATATGATAAGGATATAGATAAGAGAATATATATAACGGAGCGTAAAAATGAACAAAGCAACCCAATTACGATACAATATGGAGTCCCTGTGCATCTATCAATTCAAGACGGACCCGGTGATGCGCAGTCTACTGCACCTGCTGCGCAGCATAGAAGCCGGCGAGGCTGTGCTGGAGGCGCAAAGTGCCTTTTTCAGCACGCTGGCACCTCGAGACACGCTGCGCCGGTATATTTCCAAGTTGATCCTCACCGACGACAACGTATTCAGCAAAGCCGCCGCCGGCGATGCGGCAGACCGTCTGCGCCCGGCGATTCTGGATGGTGTAAAAAGCGACCTTGCCAAGCTGGAGGCTATTGCCGACCTGACCCCGGAAGATATTCTGCATGCAGTAGAGAATAAGGACCTGCGGGAAGTGCTGGGCACCCTGCCCCGATGGGAGAACGGCGAAGCGCTGCCGCCCCTGAGCCAAAACTGGGCAGAGCAAACGGAGGCACTGGCTGCATTCCATAAAAGAAACGGCTACGGTCTGTTTGCCAACTACGCCGCCTTTGAGTGGCGGGATCACGCCCTCTCCCCCATCTCCACCACGGACCCGATCCGGCTGTCCGATCTGAAGAACTATGAATTGCAGCGGAGTCAGGTGGTGGACAATACAGAGAGCTTTGTTTGCGGACTGCCTGCCAACAACGTGCTGCTGTACGGTGACCGGGGCACCGGCAAAAGCTCCACCATACACGCCATCCTGAATGCATACAAAGAACAGGGCCTGCGCATGATCGAGATCCCCAAAAGCGCGGTGGAGGAGTTGTCCCTGATTCGGGAGTACCTGGCGGACAGCCCGATGAAATTTATCATCTACATTGACGACCTAAGCTTTGACAGCCAGGACAACGCTTTTACAGAGCTGAAAGCGGCGCTGGAGGGCGGCCTGTCTGCCTGCCAGCCCAATACGCTGATCTATGCCACCTCCAACCGGCGCCACTTGATTAAAGAGAACTTCTCCGACCGGGAGGACGATGTAAACAAAAATGACACCCGCCAGGAACAGCTGTCTCTGTCCGATCGGTTTGGGCTGACCATTACCTTTATTAACCCGGACAAAAAGGATTATCTGGACATTGTGGAAAAGATTGCCGCCGATCGTGGCCTGCAAGTGGACGCCCAGCGGCTGGACGCTGCCGCCGAGCAGTGGGCCGTGCGCCGAGGCGGTCGTTCTCCCCGGTGCGCCCGCCAGTTTATCGATCATGTGGAGAGCGCTCTGCGCCGGGGCAAAGAATGGTAAAAATTCGTTCGCAAATTATTAAAAAATTTCATTTTTTGTTTACCGAATTCTAAAATTATGAACAAAAAAACCTGCTATGATAGCAGTATCAAAGAAAAGGAGCGAAAACAATGAGCAAAATTCTGGTAGTGGATGATGAATTAAACATCTGTGAATTACTGAAACTATACTTAGAGAATGAGGGCTACACGGTGTTTACCGCCAACGACGGCCAAGCCGCCGTGACCGCCTTCCAGCAGAAGGCACCGGATTTGGTACTGCTGGACATTATGTTGCCCAAGATGGACGGCTGGCAGGTGTGCCGAGAGATCCGCAAGACCTCATCCGCCCCCATCATCATGCTCACCGCCAAGGGCGAGACCTTTGACAAAGTGCTGGGACTGGAGCTGGGCGCTGACGACTATGTGGTTAAGCCCTTTGACGCCAAAGAGGTGGTGGCCCGGGTTAAGGCCGTGCTGCGCCGCACCCAAGGCAAAAATGACAACGCCGAGGAAAGCAAGAAAGTGGTCACCTATGACAAGCTGGAGATCAACATTGCCAACTATGAATTGAAAGTCAACGGCGTGCAGATTGACACGCCGCCTAAAGAGCTGGAGCTGATCTACCACTTTGCTTCCAACCCCAACCGAGTCTTTACCCGTGACCAGCTACTGGACGAGGTATGGGGCTTTGAGTTTTACGGTGACTCCCGCACAGTAGATGTGCATGTAAAGCGCCTGCGTGAAAAGTTAGAGGGCGTCAGCGACAAATGGGAGCTGAAAACCGTTTGGGGCGTCGGCTACAAGTTTGAGACCAAGGAATAAGTAATGGCATTTAAGGATGTACTCGTCGGTAAAAAGCCGGTCAAAAGCAATATCTTTGCCAAATACTTCCTGCTGTTTGCCGCTATCTTTTTGGTCACTCTGACCGTGCTGGGCACCGCCCTGACCCTGATGGTCAACGCCTATTCTCAAAATGAACGCACCAATCTGCTGAAAGAGAATGTGCAAAGCGTATCCGGTACCATCAGTTCCTCGTTGATCATGCAGGACATTAACAGTCGCTACAGCGTGGAAAAAGAGCTGATGTGCGAATCCCTGTATATTATTTCCAACTCTATCGACGCAGATGTATTCGTCTGTGATGTGGAGGGTAATATTATTCTGTGTAAGGAGCGGGCCTATTCCACCCCGTATTTTGGGGAGTTTACCACCTGCGCCCTGCACGACAGCTATTCCATCAGTTCCGCACTGCTGCAACGGGTGTACGAGACCGGTACCGTAACCGGGCGCATTACCGTACGCGGTCAAACCAATTATATTGTAGGCACCACCATCGTTAGCGACGGCGATGTGATCGGCTACACCTTTGCGCAGACCCAAACCGGCGTGCAATCCCTGGCACTGGCGGTAATCCGCATTTTCCTGCTCAGCGCGCTGGCCTGTTTGATGCTGGCCTTCATCTGCATTTGGCACCTGACCAAAAAGATGGTGACCCCTTTGCAACAAATGAGCGCTGCCGCCAAGCAATTTGCGATCGGCGACTTCTCTTACCGAGTCAAGGTGCGAGGCTGCGATGAGTTGGCGGATCTGGGCATTGCCTTTAACGATATGGCGGACGCACTGGATAAAACAGAAAGTTCCCGCGCCAGCTTTGTGGCCAATGTGTCCCACGAATTAAAAACGCCTATGACCTCCATTGCCGGGTTTATCGACGGTATTTTGGACGGCACCATTCCCAAAGAGAAACAAAACTATTACCTGGGACTGGTAAGCACCGAGGTGCGCCGACTGAGCCGCTTAGTGGTGGCCATGCTGAATATGAGCAAGATCGAGTCCGGCGAATTCCAAATGAAGCCCAATAACTATGACATCTCTGACCAAATCATTCGTATTCTCTTGACCTTTGAACAAAAGATCGAGAAGAAGAATATTGAGATCATCGGGCTGGAAGATCTGCAGCCCCAGTACATTGTGGCGGACCCGGATATGATCTACCAGGTGATCTACAACCTGTTTGATAACGCAGTGAAGTTTACCAACGAGGACGGCTTTATCAAGGTCACGCTGGAGGATTTGGGCAGCCAAATTCGTGTAAGTATTAAGAACAGCGGCGCCGGCATTAAGGCCGAGGAGCTGTCTCGCGTGTTTGAGCGCTTCTATAAAGTTGACAAATCCCGCAGCCTGGACGCCAAGGGCGCCGGACTGGGATTATATATCGTAAAAATGATGGTGGAAATGCACTCCGGCAGAATTTATGCCAAGAGTGAAGACGAAAACACCGCGGAATTCGTATTCACCCTACCCAAGGCATTCACCCCCGTCAATAAAAAAGGAGCAAAAGAAGCATGAGCGACTATGAACAGAACCCGATAAACGGCAGCCAGCCCCCGCAGGGGGACAGCCAGCCGAACACCGGCTATACGCCATATCAACAACCGGGCACCTATTACACACCACCCCAACCGGAGCAGTCCCAAACGCCGCCCACCGGCGACAACGGCACCACCTATCACTACGCCTACCACAGCGGCAACCAGCCCGGCGCTGCCTATAACGGCCAGCAGGCCGGTGCCGCTGACCATACCGCCCAGGCACAGCCCACCGGCCAGACTTACGGCACCCCCACAGAGCCGTCGGAGCCGGGCAAGCCGGAAAAAAAGAAGAACAAAAAGACCATTACCATCGTGGTGAGTGTGCTGGTGGTGTGTGTGGTGATCGCCGTTACCGGCATTGTACTGGCAGCCACCGGCGTACTCTCCGGGGATAAGGAAGAAAAAACAGACGGCACCTCCACCTCTCAGGACAGTGGATCTGACACCCAGACCGTCAGCGGCGGCAGCGTGGCAACCAAGGACGACAGCGGCAACCTGACTGTAGCCGGCGTAGCCAAAAAAGCCATGGACTCCTGCGTAGGTATTACCGTCTATTCCAAGCAGAATTCCTACAGCAACTTCTACGGCTACGGCTCCAATAACAGCTCCGACAGCGGTGACAACCAGCAAGCCAGCGGCGAAGGCTCCGGCGTGATTATGAAGGAAGCGAACGGCAAGACCTATATTATGACCTGTGCCCATGTGATCTCCGACGGCAGCAGCTTTAAGGTGACTCTGAATAACGGCAAAGAATACACCGCCACAATGGTGGGTGCCGACAGCCAAACGGACATCGGCGTGCTTTCCATTGAAGCCACCGGGCTGCAAGCAGCCACCTTTGCCGACAGCAAAAGCCTGACCGTCGGCGAGCAAGTGGTGGCAATCGGCTGTCCCGGCGGTCTGGAATTCAAAAACAGCGTCACCAGCGGCTATATTTCCGCTTTGGATCGCCCGGTGGAAAGCTCCATCGGCTACGACAACGAGTGTATCCAAACGGACGCAGCCATCAATCCGGGCAACTCTGGCGGCGCGCTGTTTAACATGCAGGGTCAGGTGATCGGCATCAACTCCTCTAAGATCGCCTCCACCGAATACGAGGGTATGGGCTTTGCAGTGCCCAGCTCCACCGCTGTGGATACCGCCAACAGCCTGATTAAAAACGGCTATGTAGCCGGTCGCGCCAAGATCGGCGTCACCTACAACACCATTACCAGCTACAACAACGCTGACGCCATCCTCTCCGCCCTGACAGAAAAGGGCTTTAAGAACGCCAAGGGCACCATGGTAATCAACCAAGTAAGCAGCGACTCTGACCTAGCCGGCAAACAGGTAAAGCAGTACGATATGATCGTAGCCGTCAATGGCAAGACCATGACCTCCACCGATGTGATGACGCAGGTGCTTTCCGATAGCAAGCCCGGCGACACCATCAAGCTGACCATTGCCCGCATTGAGAACAACCAAATCAAGACCTTTAAGGTAGATTGCAAGCTGATTGAAAACAAAGGCAATTAACCGCGTATAAAAAAGGAAGTGCCGAACCGTAACGGTTCGGCACTTCCTTTTTTTGTCATTGATTGCTTACAGCTCGGCGATCACTTCTACCTCGCACAGCACACCCTTGGGCAGGTCCTTAACGGCCACGCAGGAGCGGGCAGGCTTGGCGGTAAAGTAAGTGCCATACACCTCATTGAACTTGGCAAAATCCGCAATATCTGCCAGGAAACAAACGGTCTTTACTGCCTTATCCAGAGAAGTACCGGCAGCCTCAACCACGGCTTTCAAGTTCTCACACACCTGGCGAGTCTGGGCCTCAATGGTGGTAGCCTCCACATTGCCGGTGGCCGGATTAATGGCGATCTGGCCACTGGTAAACAACAAATTGCCGGTTTTCACCGCCTGGCTGTACGGACCGATGGCGCCGGGTGCGTTGTTGGTGCTTACATATTCCATAATCATTCTCCTTTATCTCAGCCGCAGACCTCAAAGCCTGCGCTTGTCAATGCCTGTTTGATAGACTCAATGTGGGCGTTGTCCCGTGTCTCAATCCCCAGTTTTAAGAAACAGTCGGTAATATTCATATCCAAATCCGTGCTGTCATAGTTGACGCTGACCACATTGGCGCCATGCTCCGCAATAATGGAGGACACGCCGCTAAGCTGGCCCGGCTGATCGGACAGTGCAATGGTAATATCCGCCGTGCGGCCGCCCATCTTCAGCCCGCGCTCAATCACACGGGAAAGAATGGTCACATCAATATTGCCGCCGCTGAGCAGGCAGCACACATTCTTGCCCTCAATATCCGGAATTTTGCCGGCCATCACTGCCGCCACCGGCACAGCGCCTGCACCCTCTGCAATGAGTTTTTGCTGCTCTAAGAGGGTCAGAATCGCCAGGGCAATCTCATCATCGCTGACGGTAACAATGCCGTCCACATACTGCTTAACAAGTTCAAAGGTGTTATTGCCCGGGGTCTTTACAGCGATACCGTCGGCAATGGTCTGCACCTTGCCAAGGGTCTCAATCTGATCGTCCTGCACCGCATTAAGCATAGAAGGTGCACCTTGCGCCTGTACGCCGTAAACACGCACACGAGGATTCATCTGTTTAATGGCAAAGGCCACGCCGCTGATGAGACCACCGCCGCCGATGGGCACCACCACCACATCTACATTCTCCAACTGATTCAGGATCTCCAGACCGATGGTACCTTGACCGGCAATCACATCTTCATCATCAAAGGGATGAATAAAAGTGTAGCCTTTCTCCTCTTTCAGCTCCAGCGCTTTTTTGTAAGCGTCATCATACACGCCTTTGACCAGGCACACCTGGGCACCATAGCGCTTGGTGGCCTCCACCTTGCTGATGGGTGCGCCGTCCGGCAGGCAGATCAAAGACTGAATACCATTCTTGGTAGCAGCCAGTGCCACGCCCTGGGCATGGTTACCGGCGGAGCAGGCAATCACGCCCCGCGCCTTTTCCTCATCGGTCAGCTTGCTGATCTTATAGTAGGAGCCCCGGATCTTAAACGAACCGGTGACCTGCAAATTCTCTGTTTTCAAATATACATTGGTACCCGGGTGAATATTGGGCGCCAGGATCATATCCGTCTCACGGATCACCTCACGCAACACCTGAGAGGCCTGATACACTTTATCCAGCGTCAACACAAACATTCCTTCTTTCGACTCTATATATATTACACAATTTTAATACGCCGCCGGGGTTTTGTCAACAGTTTTTGTGCCCGTCCAGATCCACCGGCAGTTCCCGGTTGGCAGTTACCGTATTCGGTGTTACCCGGCAGTCCACAGCTCGCACCTCTACACCAGCAGCTCGAGCGTCACGCAGTGCCCGACAAAAAGCCGGGTCCGTCTCCCGGTTGGGTCGAAATGCGGTGCACCCACCCATTTGTACGATGAGAAGCGCCATGGCCCGGTAGCCCTGCGCCACTGCCTGCACCAATTCACCCATGTGTTTGGCGCCCCGAACGGTGGGTGCGTCCGGGAACACTGCCCACTCTCCCTGCCGCAGGGTCACGCCCTTCACCTCCACAAACAGCCGCTGTCGGTCATTTTCCGCATAAAAATCCAGCCGAGAGGCGCCAAAGCGAACCTCCGGTTGCACCAAAGTAGGCGACGACAAGATCGCCCCGGCGCGCAGTAGCTCCCCGGCCACCTGATTGGGCGCCGCCGCATCCATATTCACTAGGCCAAAGGGGGTCTCCACCGTCACCAGGTCGTAGGCGGTCTTTCGATTTGGGTTGCTGCTCTTTTCCAAATACACCGTAGCGCCGGGCACCAGCAATTCCCGGCAACGGCCGGTGTTCTTCACATGCACCGTCTCCAGCATACCGTCCACCGTACAGTGGGCAATAAACCGATTGGGCCGCTCCAAAAACACCGCTTTATGAATATCTGAATACTGCATACATAAAGCCTACCCCACCGGCGGCCATTTGTCAATCCCCCGGCAGGTTTCCGCTATTTTCTATTGACTTTGCCGTTCAACTCCTATAAAATGGAGAGTGATATTATATGTTGGAGGACACCCACATGACCAAGATGAAAAAGATCCTTGCTGTGGCTCTGTGCGTACTGCTGCTGGGCAGCGTATTTGCCGGCTGCTCCGGCAAGAAAGCAGAACAGACCACGGAAATTACAGACGAAACCCTGCTGATCGCCTACACGGCAGACAACGCCCCCTTCTTCCAGATAGATGAAAAGGGCAACGCCAGCGGGTTTGAGGCCGACCTGATCGCTAAGATTTTTGACAGCATTAAGGACGACTGCAAAAACTACGCCTATGTGAAGGTGGAGCCGGGCTACCGCCTGGGTGAGGAGACCGCCTATACAGACAAGGACGGCAAGACCTATATTGCCTACATGGCCGTAGGCGGACTGCAAAAGAACGACGGCACCAATAACGAGGATTACAGTTTCACCAACACGGTCATCAGCAACCGAGTGGTGACCTTGGTAAAGAAAGACAGCAAGATTAAAGATTACAGCAATCTGGGCGGCGCCAGGCTGGCTGTGGTGAGCAAGGCAGCGCAGAATGCACTGGCAGATAACGCCGTGATCGCCCAGCGCAGCGCCAAGACCACCACCGTTTACAAGACGGCACAGGCGGCCTTTACCGCTCTGTACCAAGATAAGGCAGACGCTGTGGTCATCGACGAGTTTGACCTGCGCACCTTGGACTTCATCTTAGACGGAGAGAAAAAGGCTTTGACTGACTGGACAACAGAGCTGAACGGTCAGTTGGACACGGTGGAATACGCCTTTGCCACCGCCAAGTATGACCGACTGAAGGACGACATCAACGAGGCGCTACTGGAGCTGAAAGACCCCAAGTACAACGACAAAGACGAATTCACCCCCATTGTAGAGCAATACTTTGGCTACAACGCCTCCAACTTCTCATACATCCCTGCAGACAAATAAGCAGCGTACATCACTCACACCTGTGGCCACCCCACAGGTGTTTTCTGTAAGGGAAGCATAAACAGAATTTGGCACCCCTTGTTGCAAGAGGTGACTCCCCGCAGTGCGGGGAGATGTCGCGTAGCGACGAGGGGACGGGCACCGGTTAGGTGCTGGCGCGCTTGCGCGTCTGAGGGGATAAAACAAGCTCTGTATAATTGCCCTTGCAATCTAAAAAGAACCGCCTGACCTACCGGTCAAGCGGTTTTCCTTTTTATACGCTTATACGGGTATATACTCCACTGTGTCCACCGGCACACCGTCCCGGTAATACACCCGGGGCACCCGGCGGGCAATGCGGCAGGGCAGCTCATAATTGAAGCTGTGCGCCAGACCGGACACCTCCTCCATACTGAGGGTTTCGTTACCGTCCGTTCCCACCAAGGTTACCGGCGTACCTACTTGCACACCGGGTATCTCCGTCACGTCCACCATAAACTGATCCATACACACCCGACCGAGAATCGGTGCGCGCTTGCCGCCAATGAGCACCTGGCCCATGCCGGATAAGCAACGGGGATAACCGTCTGCATAGCCAACCGGAATGGTAGCGACTCGGCGGGGAGATGAGGTGGTGTAGGTACCGCCGTAGCTGATCTCCCGCCCCGGTTCCAAGGTCTTTACATGGCTGACCCGAGCCACCCAGCGCAGCACAGGCTGCAAGGGCAACAGGGATTTGTCCACCTCTTCCGAGGGATACAGACCGTACAGAATAATCCCTGCCCGCACCATATTAAAGCTACCGCCCAGGCGCATAATCCCGGCGGAATTGTTCAGGTGTTTAATCGGAATTTCCACCCCACGCTGCTCCAGCAAATCGCAAAACTGCAAGTATCGCTGCCGCTGGGTCTCCGCCTTGACAAAGCTGGTTTCGTCCGCCGTGGCAAAGTGGCTGAAAAGCCCCTCCGGGTAAATCCCCGGCAAATCGCAAATGGCCTTGCAAATATCCGCGCTCTCTTCATTCACCTGGAAGCCGATACGGCTCATACCCGTGTCCAGTGCAAAGTGAAAAGGCACCTGCTTACCCTGGCGCACCGCCTCCGCCGACAGTGCCTTGGCTGCCTCCATGGAGAAGATCGGCAGTCGCACATTTTGTTCTACCGCCCGAGGAAAATCGTCCGGAAATACCGGTCCCAATACCAAAATGGGCAGGGTTACACCTGCTCGGCGCAGTTCCAATGCTTCTTCAATACAAGCCACACCGTAAAAATCAAAGTTCTCTTCATACCGGCGGCCGATATATGCCGCACCGTGACCGTAAGCGTCCGCTTTGATCACACCCAGCAGCTTCGTATCCGACCCAATCTTTTGCCGAATGGCGGCAATATTCGCCTCCAAAGCATTTAAGTTAATTTGCGCTTGGGTTCTCTCATACATCTGCAATCACCTCCGCCAAAGGCGCAACGGCAATGCCATTCTCTACAAAAGCGCTGCGCAGCGCCTGCACAAATTCCAGTGCACGGGCACCGTCGCCGTGAACGCACACCGAGTGCGCCACCACCGGAATATCCTCACCGGTATAAGCCGTCACTTTCTGTTCTTTAACCATACGCACCACCCGGTCAATAGCCGTGGCGGTGTCTGTAATCATAGCGCCGGGCTTGCGCCGATCCCGCAGGCTGCCGTCCGCCTCATAGGCACGGTCGGCAAACACCTCGCAGCCAAAGGACACGCCCTGCTCTTTCGCTGCCTGTTGCAGACAGGAGCCTGCCGGTGCCAGCAGCACCAGCGCCGGGTCAAAATCCCGCACCGCGCGGGTCACCGCCCGCGCCAGTTCCAAATCCTTGCAAGCCATATTGTACAAAGCACCGTGGGGCTTCACATGCTGCAAGAGAGCGCCGTTTGCCCGGCAAAAGCCGGCAAGCGCGCCAATCTGATACAGCACATCCCCATAGGCCTGGTCCGGGGTCACCGCCAGCTGCCGCCGACCGAACCCCACCAAATCCGGGAACCCGGGGTGGGCGCCCACCGCCACACCCTGCGCCCGACAGGCTGCCACCGTGGCCCCCATCACAGAGGGGTCGCCGGCATGGAAACCGCAAGCCACATTGGCAGAGGACACCAGCGCCAGTACCCGATCATCCGACCCGATGGTGTAGGCACCAAAACTCTCGCCCAAATCCGAATTCAAATCCACTTTATACATAAATCAAGCTCCAAAAAATCAATATTTCAGCATAGTATTGGGCACATCGGTAATGAGCATATGCCCCGGTGCGTGGGTAATGGCAAAGGGCACCTTGGCCGCCATCACCGCTGCCTGAGGGGTTACCCCACAAGGCCAAAACACCGGCACCTCGCCCGGTCGAATGGTCACGCTGTCGCCGTAATCCGGGCAGTGCACATCGGCAATTCCGATGGCTGCCGGGTCGCCGATCTGTACCGGCGCGCCGTGCACGCGGGGCATGGCAGAGGTGACCTGTACGCTGCGCACCACCAAATCATGCGGAATGGGACGCATGGACACCACCATATTGCCGTGAAATACGCCTGCAGGCTCCAGGGCCAAATTGGTATTGAACATGGGCACATTGCGCCCTTCTTCAATATGCCGCACCGGCACCCCCGCCTGCAAAAGCTCACTTTCAAAACTAAAGGAACAGCCGATCAGGAAGTACACCAAATCGTCCTGCCAATAGGCGGAAATATCCGTTACTTCTTCCACCAACTCCCCTGCCCGCCAAATGCGGTATTTGGGAAAGGCAGTACACACATCGTCACCGCGGGTCATGGCGCCCATTTGGCGGCAGCCCGCTTCACCCACCTCTAAAATGGGGCAAGGTCGGGGATTGCGCATACAAAAAAGCAAAAAGTCAAAGGCCTGTGCCTTCGGCAAAATGCAAAGGTTGGCCTGGGCATATCCGGCGCACATGCCGGAGGTCTGGCCCTGTAGCTTGCCTGCGCTGATCAGCGCCCGCACATCCCGAGGCGCCCAATCGCTGTAATCCATTCTATATCCTCCTATGCCGAAAGGCAATATTTTTTACCAGAAAAGCAAATTGTCCAGCCATTTTTCCTGCTGCCGGGCGATCTTCTCCGCCCCTTGCACCGTAATGGGCACAAAACGCACTGCATCCCCCGGCCGTGCCTGCGCCAACAGCGACACATCGCAGCCAATCACCGTAGCGATCTTGGCATAGCCGCCCACCGTTTGGTGATCGCTCATCAGTACAATGGGCTGACCGCTGCCGGGCACCTGCACACTGCCCCGTACAATCCCGTCAGAGCAAATATCCACTCCACCGTCTGCCGTCAGCGACGGACCCTCCAGCCGCAGACCCATACGGTCGCTCTTTGGGGTAACAATATAGGACTTGCTGTAAAAATCCTTCCGTGCAGCCGAGTCAAATCGGGCCGCCTGTGGGCCGTCAATACACCGCAGCGTAAACGGCGGCGCAAAGGTCACCGGCGGAATATGCCAAGGCGTCGGATCACCGATAGGCAAACAAAAATCGCCGGTGGTCAGCACATCGCCTGCTTGCAGGGCGCGACCGTCCAGTCCGCCCATTTGAATTTTCAGATCCGTGGAGCGGCTGCCCAACACCACCGGCACATCCATGCCGCCGGACAGTGCTAAATAGCACCGCAAACCGGTGCGGGCAGCGCCCAGTTGCAGACGGTCGCCGCTGCGCACCCCATAGGCACGGTAATTTTCAATGGGTTTTCCATTTAATGTGGGGGCAAAGTCGCCCCCTGCCAGAGCAAAATAGCCCTCTCCGTCAAACCGGGCCGAAATACCGGTAAGCGTCATTTCCAGTACCGCACAGCCTCGGCAGTTACCCACCAGTCGATTGGCAATCTGCATAGAAGTTAAGTCCATCGCCCCGCAGGTGCAAAAGCCCAGGTGTGCCACTCCGGTGCGCCCCAGATCCTGCACAGTGGTCAAAGCACCGGGGGCGTCGATCATCAGTCGCATACCGACACCTCCTCCACCTGTACCGTATAAGTGCCCGCTGCCACTGCCCGAGCGATTTCTTCATACTCGGCAGGCGAGATGGGCACAAAATGCACCAAATCCCCTGCCCGGTACAGGATCGGTTCCTGCCGCTGCCGGTCAAATACAGATACCGGTGTGCGCCCCAGCAGCTGCCAGCCGCCGGGAGAAGCCAGCGGGTACACCCCGGTCTGGGCTCCGCCGATTCCCACACTGCCCGCAGGAATACATGTGCGTGGGCTGTCCAGCCGCGGCGTATGCAGCCGAGGGTCCAGCCCCCCTAAATAGGCAAAGCCGGGCAAAAAGCCCAGCATATAAATCAAATAATCCGGTGCACTGTGCAGCGCAATCACTTCCTGCGTAGACAGACCGCTGTGGTGGCAAACAAAGTCCAAATCCGGCCCATAGTCGCCGCCGTAACACACCGGCAGCCGAAACACCCGCCGCCGATCCTGCCCGGCCACAGACAGACTGTCCAGCAATCGCCGCAGTTGCCGCTGCAACGCCTTTGCAGAAATCACCGTGCAGTCATAGCACACGGTCAGATCCGCATAGGCGGGGATCAAGTCTGTAATCCCACGCAGGCCGGCGCTGCCAATGGCTCCTTGCAGGGCGGTGACCCGGCGATTGATTGCCGGGTCGATTCCGTCCCCCAAGTGCACGGTAAGGGCGCCCTCGCCGCACTGTAAAAAGGAATAGTCCATCGGTTATTCTCCGTAATAGCCGTCAAAATAGCCCTTGGCAATGGTGTCTGCAAACCAGCCACTGGTCTTTTGCACCACCTTGGGCGGGTAGCTGATCAGCTCTTTCATCAATTTCACCAATGGCAGGTTGATGCTGCGGCCAAAGCCGTCTATGCTGGGAATATTGCGCCCATACATATCCAAAAGCCCGGCTCGCGCCGCCTCCTCCATGGCCCGCTGCTGCACCTCCTCAGACTGGAACAGATCCGCATTGCCCAGCAAATACGCCGTAGCTGCCATCATGGCATTGCAACCCCAGTCAGAGCAAGTAGCAGTAATCAGGTTATCCGCTGTGCTTTCCACCAAAATACCGCCGCCGCAGGAGCATTCGCACTCACCGTCGTCTGCATGGGGCACATATTTGCGGATATGGTCGCCGATGGCTGCCATACCAATCTCGTTGCCTAAATCGCCGATGGAAAGGTTGTAAATGCCCCGCGCCTTGCAGGCGTTAAAGAGCACATCGCTCTTGGCCTCCAGCTCCGTTAAGCATTTGCCCACCGCGTTATGGTACGCACCCTTGGCATTGCGCCCGGGTGCCTCATTGGTGATCACTGCCGCCGGAACACCTTTTGCCAGCAGCGCCTCTGCCTGGGCAGGCGCCTCTCGGTCGTCCTTGGTAAAGGGCACGGCGCACATGGAGAATGGGTATTCCTGCGCCTCCTCTACTGTGTCATACAAATGGAAGCCCAGTACCATGGCCAACCGCCGCACCGCCTCCATACATTCCTCCGGCACCACCAGTACCGGCGTGCAGTCAAAGGCTTTAATCAGGAAGCGCGCCAGCATCATAGAAGACACCATGCCGTCCGTCTCCGGCTGCTTCCAGGGCAACAGTACAAAGCCGGTGATGATATACACCAAATCGCCCGAGTGGATATGCGCCACCAGACCCTTGGCCGCATGCACAGACAGCGGCTCTCCGGCATAGTCCCTAGCCGCCCGGTACAGAATACGGCACACACCGTACCCTCGCGGATCCAGGGTCATTAAGCTGTCCAAATTCTCACCGATATTATACAGTGTCAGTTCTTCATTGGTCATTGCAGTTGTCCCCTCTCGTCCGATTTAGCGGGCCGTTGCGTCCATAAAGTCCGCTACCAGAGCGTCCTGCAAATCTTTCAGCATCTGCGGCGCTTTACCGCCCACCGGTTGGCCGTCAATGCTCTCTGCTGCCAGGCAGAAGGAACCGGAGGAGGACACGATGACCTCATCCGCCGCCATCATCTCTGCCACGGTAAAGGGCGTTTCATCTACTGCATAGCCCAGCTTCTTGCACATTTTGATCAAATGAGCACGCGCAATACCAGGCAGAATATAATGATCGGTGGGATGGGTCTTAAACACGCCGTCCTGAATAATAGACACATTGGAGTGCGCGCACTCGGTGACAATATCGCCCCGATGGAACACGGACTCATCGCACCCGGCCACCGCCGTGCGCTGGGCTGCCATACAAGAGGGCAGCAGATTCAAGGTCTTAATATTGCAATGGAGGAAGCGCGTATCCTCCGTGGTAATCAGTTTGATTTTTTTATAGGTATCCTGTACAGAACAGGGGGTCAGCACAATCCACAAATTGGCCGGTACTTTGTCCGGATCCGGATACGCGTGGTTGCGCATCGCGGTGCCACGGGTCACCTGCCAATAGACGAACTGCTCGCCGCAGTCCACCTTTTCCACCATCTCCGTAAGCAGGGCGCCCATCTCCGCCTTGGTCTGCGTCAGGCGAATACCCAAAAGCGCCGCACTGTTATAGAAGCGATCCAGATGCTCATCCAGCGCATAAATCACATGATTGCGGCTGTAAGTGGCATCATAGCAACCGTCGCCGAAAAAGCACACACGATCCAGCATGGGCACCTGCATTTCCTCCAGCGGGCCAAACTTGCCGTTGTAATAACCTAAATTCTCCATATCGCATATCCTCCAAAAAAAGACAATAGGGCACCAAAGCGAAAAAGCTCCGTTGCCCTTATCCAATACTATATCACTTTCCAGCGCAAAAGTAAAGACGCCCGGAAGATAATCCGCACAAGGTGTTTATCCAACTACCGTCTGACATCGAATTACCCCCCGTTGCCGACCAGGATCGCGCCCCTTTTGCAAAAGCCGCATACAGTATATCAGCATTTGTACGCAAAATTTGTCAAACCCTGCGGCAAACCGTCACACCCGGCAGATTTGTAGAAAAAATCCACAAATTTCCAATTTTTTTCTCAATTTGGTTGACATTACGAGTCGAATTCTCTATTATTAGAGCTGAAACAGCAGAAAAAAATAAGCGCCTGCAATGCCTGCTGCTTTGAAAATGAAAAAAGGACGGAAAAATCATGCTTATTGAAGAACTCGCTCAGGAATATCGAACACAATATAATGTTTTGTGCGCCAAAATGGACGGACTGCGCCCACTGCTTTCCGTCTATGGCGGAGAGGATCTGTACCGCCTGCGCAGAAAGCTGCGCACCTACTACGAAATGGCCTGCGAATGCCGCCACATTGCTACCATACTGGAAAGCTACTACGATGAGGAGGACGGCGTATGACAGATATGATTGAAAACTGCTGCTTTGCCTCCCCGTCCCAAACGGAGCCGGACACCCAAACCATCACCCGCCGTGCCTTACTGGCCGTGTTGCCCATGGTGCTGGAACAGGAGCTGAGCCCACGGCAGCGCACCTGCCTGCGTGCTTTTTATGTAGACGGCAAAAGCCAAACGGAAATTGCCCGGAGGCTGGGTCTGTCTCAAGCTACGGTCAGCTACCATATCCATGCAGCAAAGGCGGCAGCCAACCGGCTGCTGCACTACTGCCAAATTGCCGTGGCCAAGGCCAATGACTGCTGGCTGGAAGCAGAGAACAACGGACTCTGATCCCTCTATCTGCACAGACGATACAGCAGCGGCAAGTCTGCGAACGCCCAGGGCGTTACCGCCGCCAACACCTGAAAAGCGCACCTGCACACGGTGCACCGCAAAAAAGAACAGCGCACCTCAGTTCATCCTATGAGGTGCGCTATATTTTGTGTGTATTTTTATGTATACATCAGAATGGCGATTAGGAAAAAGACGGCATAGAGCACCACCTGATGGCCCATATAGACCCACAAGCTGTTGCGCCCCAGCCAGCACAGCACCCGGCTGTGGCGGCGGTAAAAAGGCGCCGGCAGACGGCCGTCCCGCACATAGGTCCCGGCGAAGGCCCCCAACAGAAATAAAAAGAACCAAGGGATCAAAGCAAAATAGTCGGCAGACCGGAAGCTGCTGTTAAAAAAGCCCAAGGGCATCAGCCAGTTGGTACGAAACAGTGCCGCAGGCAAACGCACCAAACCAAAGACCATGGTATGCTCCGGCTCACTGACCCCATAAGTCAAAAAGAACAGCAAACCGCAAACAAGCATGCCCAAACGTGGCGAAATCTTCTTCATCACCGGCAGCAGCAGACCGGTAAGGATCATACAGCAGCCCAGGCAGGAAAGAATACCAAAGTAGATCTTCGCACCGGTCATGCCCATTAAGGGCAGCACCCAAACGGTAACTCCGGTGATCACCAAACCGCAGCCCAGCACCACTGCGCCCCGGCGTATCGGATTACGGGACAGGCGGGAGCAAATGCCGGATATCAGAATAAACAGCCCCCAAAAGATAGGCTGCACGGTACACAGAGCGTCAAACACTCGGTAGCCCCAGGACAGCTGCAACACATCGCCCACATCCAAAAAGGCGTGGTGCACCACCATACAGAGAATGGCAAAGCCCCGCAGCTCGTCCAGCAAATAAATGCGGGGACGGGCAGATTTGGGCTGTTTTTGGCGTTTTTGTCTCACCGGAGCACCTCCTATACCAAGGCTTTGGGTTATTTTACCACAAAAGCGGCGGTTTGTACACGCAATTTTTGGCACACCGTGGCAAAGAATTGCGCTTTATAATTGTATATGAAATGGAAGTGTGCTATAATACGGTGAAGTCTTAAAAATACAGAAAACGGCGATCCGCCGAGAGGAGCATGTATATGAAAACCGCTGTGGGCGAAGTGCAGGGCGAGGCCCTGACCCTTGTAAACACCACCAACACTGCCATTGCCGCCGAGTCCGGCTCGCTGCCGGTACTGGGCACCCCCTTTATGCTGGCCCTGATGGAAAAGGCCACCTGCGAGGCGGTGGCAGACCTGCTGGAGGACGATGAGACCACCGTGGGCACGGCCATGAACATTACCCACATCAAGGCCAGTGCCATTGGCGAGGTGATCACCGCCAAGGCTATACTGACAGAGGTGGACGGGCGCAAGCTCACCTTCCATGTAACCGCCCGCAACGACAAAAATGAGCTGGTGGGCAGTGGCACCGTAGAGCGCTTTGTGGTACTGGCGGAAAAATTCTTAAGAAAGGTCGAGGGAAAATGAGATTTTCTGCGGTAATCTTTGACTTTGACGGTACGCTGTGCGACACCGGCCCGGGCATTATGAACAGCGCCGCCTATGCGCTGGAGGCCTACGGCTTTGAAGTGCCCCGAGAGCCGGGCGCCCTGCGCTGCTTTATCGGGCCGCCACTGTTGGTGACCTTTCAGGAGCAATTCGGCGCAGATGCGGCCACAGCCCAAGCGCTGGTACAAAAATACAGAGAGCGCTACAACGGCGCCATTCTCAATGAGAGCATGCTTTACCGGGGTATTGTGACCTTGCTGGAGAACTTAAAAGCGGCAGGTATACGCATTGGCATCGCCTCCTCCAAGCCCAAGCGCTACATTGACCAGCTGCTGGCACACTTTACCATTGACAAATTCTTTGACGCAGTGTGCGGCGTGGATTTTAACACCGACTGCGAAAGCAAGGCCAGCATTATCGCCCGCTGCCTGCAAGAGCTGGGGGCCGCCCCGGAAAAGGCACTGATGGTAGGCGACAAAAGCTACGACATCAACGGCGGCAAGGCCAACGGCTTAAAGACCGTGGGCGTAAACTGGGGCTACGGCAGCAAGTTTGAATTTATTGAAGCCGGCGCCGATTTTCAAGCGGAGAAGCCCATGGACATTGAAGCCATTGCGCTGGGCTTTTTTGAGCAAACGGAGGAATACGGCGGCATTTATAACGGCCGCATTCTCACCCTGCACTGCGACACGGTGACTATGGTGGACGGCGCGGAGGAAAAGCGGGAGGTTATCGACCACCCGGGCGGCGTGGCCGTAGCCGGACTGACAGAAAACAAAGAACTGCTGCTGGTGCGCCAGTTCCGCTATCCTTACAAAGAGATTTTGCTGGAGATCCCCGCCGGCAAACTGGAAAAGGGCGAGGATCCCTTTGAAGCAGGCAAGCGGGAATTCAAAGAGGAATGCGGCGCTACGGCAGACAGCTACTTCTCCCTGGGAGAGGTGTACCCCTCCCCCGGTTACTGCGGCGAGATCATTCACCTGTACGGCGCTGCCGGGCTGCACTTTGGGCAGCAGCATTTAGATGAGGGCGAGTACCTGGATGTGGTGCGCATGCCTCTGGACGAAGCGGTGCGCCGGGTAATGACCGGTGAGATCAAAGACGCCAAAACCGCCATCGCCATTTTGAAATTAAAGGAACGAATCAATCCATGATCTATTTAGATAACGCAGCCACCACCCGACCCTGCCCGGCCTGTGTGGCGGCCGTGAGCAGCATGCTCACCGACCACTTTGCCAATCCCTCCAGCCTGCACGGTCCGGGGATTGACGCCATGAAAGAGATCATCGCCGCCCGCAGCGCGTTGGCAGACGCTCTGGGGGTGGAGCGAGACACGCTGACTTTCACCTCCGGCGGCACAGAGGCCAACAACCTGGCTCTGTTCGGTGCAGCCTATGCCAACCGGCGGCGGGGCAAGCGCATTGTGACCACCGCCATAGAGCACGAGAGCATTATACAAACCGCCGACCAGTTGGAGGCAGAGGGCTTTGAGGTCATTCGCCTGCAACCGGACAAAACCGGCAATATTACAAAACAGCAGATTGAAAGCGCCATCACCCCGGACACCATTCTGGTCTCCGTCATGCGCATCAACAACGAAGTGGGCAGCATTCTGCCGGTGGAGTGCATTCGCCGGGCGGTACAAAAGGCCGGCGCACCGGCGCTGATCCATACCGACTGTGTGCAGACCTTTGGCAAGGTGCCCCTGCGGCCGGACAAGCTGGGGGTAGACCTGATGACCGTCACCGCCCACAAGATCCACGGTCCCAAGGGGGTAGGCGCTCTGTATGTGCGCAAGGGCGTGCGTATTCTGCCCCGCACCTTTGGCGGCGAGCAGGAGAAAAAATTGCGGCCGGGTACGGAGGCAGCGCCCCTGATCGCCGGGTTTGGCGCTGCGGTATCGGCACTGCCGGATCTGCGTGCGCAAAACGCCGCCGTCAAAGAACTGAACGCTTATACGAAGGAACGGCTGGCGGAGATCCCCGGTCTGACCTTTAACAGCGGCGACCAGGCCTCGCCCTATATCATCAATATTTGCGTGCCCACCTTTATGCGCAGCCAGACCATTATTCAGGAGCTGTCCGCCAACTACGGCATTTGCGTCAGCAGCGGCTCCGCCTGCGCCAAGGGCAAGCGCTCCCATGTGCTCACCGCCATGGGGCTGCCGGAGCAGGTGATTGACAAATCCATTCGTCTGAGCTTTAGCGGCCAAAGCACGCAGAGAGAAGCAGACGCCTTTGTAGACGCGCTGCGCGACCTGGTAAAAAAACACCCAAAGGAGTAACCTATGCGAGAGATCGTACTGATTAAAAACGGCGAGTTGGCACTAAAGGGACTGAACCGCAGTTCCTTTGAAGATGTGCTCATTAAGAATATGCGTCGCCACCTGGCGCCCCTGGGTACCTTCCAGTTTACCAAGAGTCAAAGCACCATTATGGTGGAGCCGGAGGACCCGGACACGGACCTGGACGACACGGTAGACGCGCTCACCCGAGTGTTCGGCATTGCCGCCCTGTCCCGGGCCGCCGTGTGTGAAAAAGATATAGAGGACATTGCAGCCACGGCACTGGAATACCTAAAGGAGCCGCTGGAGGACGCCAAAACCTTTAAGGTAGAGGCCAAGCGCAGCGACAAAAAATTCCCCATGAAATCGCCGGAGATCCGCCGAGAGATGGGCGGTCGTATTCTGCGCCGCTTTCATCATCTCAAGGTAGATGTACATAACCCGGACATTACCGTTACCGTAGAGGTAAGGGATCGCTACGCCTTTGTGCGGGGCAACAACCTGCACGGCGCAGGAGGTATGCCCACCGGCACCGGCGGCCGCGCGGCGGTGCTCATCAGCGGCGGCATTGACTCTCCGGTGGCCTCTTATATGATGGCCAAGCGGGGAATCGAATTGGTAGCCGTGCACTTTGCCTCGCCCCCGTACACCAGCGAGCTGGCAGAAATGAAAGTGATGGAGCTGCTGAAGAAAGTAGCCCGGTACAGCGGCTGGATCACCACCTTTGTGGTGCCGTTTACGGAAATCCAGGAGCAGATTCGGGACAAGTGCCCGGAGGAATACTTTACCATTATCATGCGCCGCGTGATGATGATGATCAGCGCCCGCATTGCAAAGAGTCAAAACTGCCACGCCCTGATTACCGGCGAATCCGTAGGGCAGGTAGCCAGCCAGACCATGTACGCCCTGGCGTGCACGGACTGCGCAGCGGATATGCCGGTGTTCCGTCCCTGTATCGGTATGGACAAGGACGAGATCATCGCCATCTCCCGCAAGATCGACACCTTTGAGACCTCTATTGAGCCCTACGAGGACTGTTGCACCGTCTTTACCCCCAAGCACCCGAAAACCAAGCCCCGGCTGGATGATGTGCTGAAAGCCGAAGCAAATATGGAGAATTTGGACGAAATGATGGACCGGGCCGTGGCCGGCGTAAAGAAAGTTGTGATCAAATAATGGAGCCGCGCAAGGATCCCAATGAGGAGATTGACCGCATTTTAGCCGACTTTCAGCAAAGCCGCACCCAGCGGCAAGCAGAGACGCCGGCAGAGCCGCCTGTTCCGGCAAAAGAAAGGAAAGCGCCGTCAAATAAAGAAAAGCCCTCCAAAAAAGCAAAGCCGCCAAAAAAGGAAAAAGCGCCCCGCCGCCCGCTGAGCAAAAAGCAAAAGCGGGGGCTGTGGATCGCCTTGGTGTGTCTGGCAGTGGCTGTGGCACTGGCCTTTGCTCTTCCCGCCATACAAAGCAGCCGCCAAAGCGCCTACTTAAAGCCCTACGAGACCAAGTACGGCATTCACTACCCGGCAGGTATGCTGGAGCAATATTGCGACGCCTATGGCAAGGATCGGCAGATTGCCGGTTTTCTGACCTACGGCAGCAGCGGCGAGATCACCGTGTCCAAGACCAAAAACGAGAGCCAGCCATATCTGGATAGCAACAGCGACTTTTTGCACTTTGGGTTTAACACCGTAATCTATGGCAGCCCGCAGCAGCTGACCGGGCTGGAAGCCGCCTATGGCAGTGCCGCCGCCTGCAACAACAGCGGCACCACCCTTACCTACAATTCCCTGTTTGAGACCGGGCAGTGGCAGGTGGTAGGCGCCCTGTATGTAAACACCAAGGCCAAGGACGACAACGGTTACTGCTTCCCCTACAATGTGACCGGAAACATGACGGCAGACAGCTACAAGCAATTCTACGCCCGACTAACCAACCGTATGATCTATACCAGCAACCGTACCTTAAATCGGGCGGATCACCTGCTGACCATTGCCACGGACAGTGCGCTGCACCCGGGGTGGAAATTCGTGTTGGTGACCGCTAAGGACGGCGAAGTGCGGGATGTGCGGGATGTGCAAACGCCACAGTACCCGCAGGCGTACTTTGACGAGAAAGGGAAAAAGAACCCTTATGCGCCCTTTAACAAATGGTATCCGGAGATCTATGTGGGCAACGGCACGCAAATCTCCCGCCAAAACAAAAAAGACTACCAAACAAAATAAAAAAGGCCCCGACGGAATTTGCGTTTCGCCGGGGCTTTTTTCGGTTTCTGTTTTAGATTTTCACATCAGCATAGATGGGATAGTGATCGGACATGGCGTCCATCGCTCCGTCTGAGAGAATCCCGTAGCATCGCACCTTGGCGGTGCCGGTCAAAAAAATGTGGTCGTAGGTAGGTGCAGAGGCTTTTTTGTTGTTGCCGCTTTTGGTCTTGGCGGCCAAGGCTTTGGTGTCCTGCATCTTTTTTGACAGGCGGCTGTAAATCTCCGGCGCATCATACACCGGGTCATACCCGCCGCCGTCCATGGCGTTAAAGTCACCGCAGGCAAACACCGGACACTTATACTGTGCCGCTAGGGATTTGGCAAGTGCCGCGGCCTGGTCTGCCTGGCTTTCCATCACCGCCCGCTCCGCCTTTTCCTCTCCGCTGCGGATCAGGTCCAGGTGGGTGGAAGATACAATATATTTTTCGCCGGACCGATTGTTCCGAAACAGTCCCCACACAATGCGGCGCAAGCGCGCATCATCCCCCCGGTCATAGGCCACATCGCCTTGCTCCAGCAGGGTTACCCGATCGCTGTCATACAGCAGACCGGTCATGCGTACCAGCGCACCGGTACGCACCGGGTACAGCAGCTTGTAACTGCCCCGGTTTTGCATCAAACAACAGTACCACTGGTCGCTCATCTCCTGCACGGCCACCACATCCGGCCGGTAGGTGTCCAGCACCTGCAAAAACATTTTGGCCCGCTTGTGCGCATCCGTGCCGCCCCAGCTCTCATAATGCACCAGCAAATTGGCACTCATAATGCGGGCGGATGTATCCTTGGCACGCTTGGCGTTCGCCTTGCCGATGCTCTCCTGGAACTCCTCGCTAACCATATAATCCGACAGATCACCTCGGCTGCGAATCACCGCCGGCACGGCAATAGCCGTACTCACTGCTGCCACCAGAACCAGCGACAGCAGGGCGCAAAAAAAGCGCCGCAAAAATTTTCTCATAATCTTCCTCCGCAGTATGTTCTCCATACCTATTATACACAAGCCGGCGTTCCATTTCCACCCTACGGCAAAAATAAAAAAGTATTGACTATTTTACTTAGGCGTTGTATATTTGTTATACTTATTATAGAAAGAAAAAACGGCGAGAATCGCCAAGTGGAGAATAACGATGATGGAAGAAACAAAAAAGAGCAAGCCCCTGCGCCTGCTGACGGTGCTGCTGTCTGTGGCGGCCGTAGCTGCCATGTTGTGGTGCGCGCCTTACTTTAAGGACGATTGGGCCTGGGGCAGCCAGGTGGGACTGGATCGACTGCAAAGCCACTTCACAGGTTACAACGGCCGGTATCTGGGCAATCTGCTGGTCATGGTTCTCACCCGCTCCCTGCCGGTGAAAATCATTTTAATGACCGCCGGGGTTCTGGCGCTGCCGTTGCTGGTCAGCCGCTTGGCCAACAAAAAGCTGTTTTTATTGTTCCCTCTGAGCCTACTGGGTGTAGCTGTAATGCCCGCCGATCTGTTCCGCCAAACGGTGGTGTGGGCCAGCGGTTTTTCCAACTATATGCCGCCGGTGCTGCTCACCCTGTGCTATCTGCTGCTGGTATGGGATCTGTGGGATGACACAGCACCGGTACAAAGCAAATGGTCGCCGCTCTGTGCCTTGCTCATCGGCGGGTGCGGTGCGCTGTTTATGGAGCATGTGACCCTATACAACCTGGCGCTGGCAGTGGCGGTTCTGATCTTTTCCAAGGTCAAGCACCACAAGACCTATGCCACCCACTGGTGCTTCCTGGCCGGCGCTGTCATCGGTGCCGGAATTATGTTTACCAACAGCGCCTATGGCTTTATTTCTTCCGGCAAAGACCAATTCACCTATCGCTCCATGGCGGTAGGCGGCACCGTGCAGCGGTATTTTGACACCATCGGCGGCAATATCATTCGTATTTCCAACTACCTGACCGAGTGCAACGCTCTGATGAATGTGCTGCTGGCTGCGCTGTTTTGCATTGTGCTGCACCGCCTGTTTAAGAAGGGCGGCGTTACCAAGAGGCGCCGGGTATGGCTCATCGTCAGTGCAGGAATATTAGTAGCCTATGCTGCTTATAGTTGCGTGCTTACCGTATGGGCCAAGATCGCAGGCAACAATGACGCCCGGGATGCCATCGACCCTGCGTGGCGCTTTACCTTTACACTGTTGTTTTCCATTGCGCTACTGCTGTGCATTCTCTTAGGCATCCAAAGCCGTCGCCGCAAGGGGCAGATGCTCTTTGCGCTGGTCAGCGTTTATGTGCTCTGCACGCCACTGTTTATCGTAACCCCCCTGACCGCTCGCTGCTTCCTCCCCTGCTATGCCATGTTTATGCTGCTGGCAGCGCTGCTGTTTGACCTGATCTATCGAGATACTGCTGACAAGACAAAGGCCACCCGCACCGCAGGCGCCGTATTTGCCGCCTGTCTGATTGCGCTGGGCGTGTTCTATGCCACCGTCTTTGTACAGATCAAGGACTATTCCGTCGGTCGAGAGGCCTATGTACAGGCACAGATTGACCGGGGCGAAAAAAAGATTTACCTGCCCATGTACCCGGCCTATACCGGCGATTATATTCGAGGCAGCACCCCCAAGGACGGCTCTGTTTGGGAGGAGCGGTACAAGCTGTTCTACGGCATTGACCCGGACATTGACCTGGTCACCGTCGGCCCCAACAGTCCCCAGGCCAAAGCAGTACTGGCACAAGATAAATAAGCCTCATTTGTCGGGTTTGATACCCACATTGAGTTACCAAATCCATAGAAAAAACGCATCCTGTAATTAGGATGCGTTTTTGTTTTGCTTATTTGCATGCAGCGCAGAGGTTATACATTGATCTCCACATCTACGCCCAGCAGGTCTTTTTCCTTAGTCAGAATGGGACTCACCACTTCGTTTAAGAAGTCAGCGGTCTGCTCCGGAGCACGGCCCACAAAGTTCTCCGGCTTCAGAATGGCCAAAATTTCCTCCTTGGTGGTCATAAAGGCCGGATCCGCAGCAATGCGATCCACCAGATCGTTCTTGCCGCCCTCAACCTTCACCACCGCACCGGCGGCCATGGAGTGCTGGCGAATTTTCTCGTGCAGCTCCTGACGGTCTCCGCCTTTCTTCACCGCGTCCATCATAATGTTCTCGGTAGCCATAAAGGGCAGTTCGCTCATCAGGCGGGCGTGGATCACCTTGGGATACACCACCAACCCGGAGGTCACGTTGATATACAAGTCCAAAATCCCGTCCGTAGCCAAGAATGCCTCAGCCACGCTGACCCGCTTGTTGGCGGAGTCGTCCAATGTGCGTTCAAACCACTGGGCCGACGCTGTCCATGCCGGGTTCAAGGCGTCGATCATCACATAGCGGGACAGAGAAGCGATCCGCTCACTGCGCATGGGATTGCGCTTATAAGCCATAGCGGAGGAACCGATCTGATTCTTCTCAAAGGGCTCCTCAATCTCTTTCAGATTTTGCAGCAGCCGCAGGTCGTTGGAAAACTTGCAGCAGCTCTGAGCGATCAGCCCCAGGCAGTTGCACACAATGGTGTCCAGCTTGCGGGCATAGGTTTGGCCGCTGACCGGGAAGCAGGCCTTGAAGCCCATCTTCTCTGCGATCTTACGATCCAGTGCCTTGCACTTCTCGTGGTCGCCATCAAACAGCTCCAGGAAACTGGCCTGGGTGCCGGTGGTGCCCTTAGAGCCCAGCAGCATCAAGGTGTCCAGCACATGGCACACCTCTTCATAATCCATGACCAGATCCATCAGCCACAAAGTGGCACGCTTGCCCACGGTGGTGGGCTGGGCAGGCTGGAAGTGGGTAAAGCCCAGACAGGGCATATCCTTATACTGGTCGGCAAACTTGGCCACACTGGCAATGGCATTCACCAGCTTTTTCTTGATCAGCAGCAGGGCCTCCCGCATGGTGATCACATCTGTATTATCGCCCACATAGCAAGAGGTGGCGCCCAGGTGGATAATGGGCTTAGCCGTGGGGCACTGCACCCCATAGGCGTATACATGGCTCATTACATCATGGCGCACCTGCTTCTCCCGTTCCCGAGCCACATCGTAGTTGATGTCCTCAGCGTGGGCTTTCAGCTCGTCGATCTGCGCCTGGGTCACATTCAGCCCCAGCTCGTGCTCCGCTTCTGCCAGAGCGATCCACAGCTTCCGCCAGGTTTTGAACTTAAAATCCGGGGAGTAGATATACTGCATTTCCTTGCTGGCATAGCGCGCGTTAAAGGGAGAATTATAAGTATCTGTCTGCATTAGTCCAGCCCTACTCTCTTCATCATCTCTTTGTATGCGTCCTCAACGCCGCCCAGGTCCCGACGGAAGCGGTCCTTGTCCAGCTTCTCATGGGTCTTAATGTCCCAAAAACGGCAGGTGTCCGGGCTAATTTCGTCTGCCAGCACGATCTGGCCGTCTGCGGTCTTGCCAAACTCCAGCTTGAAGTCAATCAGCTCCACGCCGATGGAGGCAAAGTATTCTTTCAGCACATCGTTCACCTTAAAGGCCATTGCCTTAATGGTGTCCACATCCGCCTGGGTGGCAAAGCCGCAGCTGACCGCGTGGTAGCCGTTGATCAGCGGATCGCCCAGATCGTCATCCTTATAAGAGAACTCAATAGACGGCTGGGTAAAGTCCATACCTTCTTCCAGTCCCAGACGCTTGCAGATAGAGCCGGCAGCCCGGTTGCGGATAATCACTTCCAACGGTACGATGGTCACTTTCTTCACAGCGGTCTCCCGATCGGAAAGCTCCTCCACAAAGTGGGTGGGCACGCCGTGCTTCTCTAAAAGCTGCATTAAGTAGTTGGACATTTTGTTGTTCACCACGCCCTTACCTACGATGGTGCCCTTCTTCAGGCCGTTAAAGGCGGTGGCATCGTCCTTGTAGTCCACAATCACGATGGTGGGGTCCTCAGTAGCCCATACCTTCTTGGCCTTGCCTTCATAAAGCTGTTCTGTCTTATTCATAACGCATTCTCCTCTGCAAAAAGATTGGTAAATTAAAGGGTGTGTGTTCTTATTTGTTTTGGGCAAAATATGCCTTAATCCGCTCTACGGCCTCTACGGTCTTGTCCGCATTGCCGAAAGCAGTGAGCCGGAAAAAGCCCTCACCGGAGGGACCGAAGCCGGAACCGGGGGTGCCCACCACATGGGTCTTGTCCAGCAGCAGATCAAAGAATTCCCAGCTGGTCATGCCTTCCGGCACCTTCAGCCACACATACGGGGAGTTCACCGCGCCGTAGCAAGTAAACCCGGCAGCCTGCATACCCTCAAAGATTACCCGGGCGTTCTTCTGATAATAGGCCAGGGTTTCCTTGATCTCCTTTTGCCCCTGCTCCGTGTAAACCGCTTCGGCCGCCCGCTGGGTAATGTAGCTAACGCCGTTAAACTTGGTGGCCTGGCGGCGTGCCCACATGGGGTTCAGGCTCTTGCCCTCAAACACACAGGCCTTGGGCACCACGGTATAACCGCAGCGCACGCCGGTAAAGCCGGCAGTCTTGGAGAAAGAACGCAGCTCAATGGCGCACTTCTCGGCGCCCTCAATCTCATAAATGGAATGGGGCACATCGTCCTCTACAATAAAGGCTTCATAGGCACTGTCAAAGATGATCAAAGCATCATTGGCCAGCGCATAGTCTACCCACTTTTTCAGCTGCGCTTTGGTGGCGCACATACCAGTGGGGTTGTTGGGAAAGCACAGGTAGATCACATCCGGAGTCTCCTTCGGCAGATCGGGCATAAAGCCGTTCTCCTCTGTGCAGGGCATATAGATAAAGTTGCTGTAAAAGCCGTCGGCGTTCTTGTCACCGCTGCGGCCGTCCATGGTGTTGGCGTCCACATACACCGGGTACACCGGGTCACACACAGCGATCTTGTTGTCTACGCTGAACAGGTCGCCGATATTGCCGCAGTCGGACTTGGCGCCGTCGGACAAAAAGATCTCGTCTTTCTCAATATTGACCCCGCGGGCAGCGTAATCGTGCTGCTGAATGGCGTCCAGGATAAATTCGTAACCGTGCTCCGGCGGATAGCCGCGGAAAGTGGCCTCGTTGGCCATCTCATCCACCGCCTTGTGCATGGCGTCGATCACGCTGGGCACCAGCGGACGGGTCACATCGCCGATGGACAGACGGATAATATCTGCCTCTGGGTGCGCCTCCTGGTACTCCCGCTGCTTTCTGGCTACCGTTGAAAACAGATAAGAGCTTTCAATCTTAAAAAAGTTTTGGTTGATCTTCATTATTCTAAAAAACCTCCTGTGTTTTATAGATCTATCTTGCCGCTAAAGACGGTGGTGGCCGGGCCGGTCATCATGACGCTGTCCTCGGCCTTACCGCTCCAGCTGATCTGCAAGTCGCCGCCCAGCAGATGAACCGTCACCCGGTGGTCTACATAACCGCCCAGAATCGCTGCTACCGCCGTGGCACAGGCGCCGGTGCCGCAGGCCAGAGTTTCCCCGGAACCGCGCTCCCACACCCGCATTTCAATGTTCTGCCGGTCCTGTACAAAGGCAAACTCCGTGTTAGTCCGATCCGGGAAGCAGGGATGGTGCTCAAACAGCGGCCCCACCTGCTCCAGCGGGAACTCCCGGGGCGAGTGGTCAATAAACACCACCGCGTGGGGGTTGCCCATCGAGACACAAGTCATTTTATACACCTTGTCGTGTACGGTAATAGGTACATCCACCGGCGGTTTGCAGTCCGTCACCACCGGAATGGCCGCCGGATCCAAAATCGGCGCACCCATATCCACACTGGCGCCCACGGCCACGCCGTCCTGCACCTGAATGTCAATGGTCTTAACCGCACCCATGGACGCAATGGTCACGGTGGTCTTGTCCGTCAGCTTGTGGTCGTACACATATTTTGCCACGCAGCGAATCCCGTTGCCGCACATAGCGCCCCGGGAGCCGTCCGCATTGTACATCACCATTTCAAAATCGGCGTTCTGCCCCTTCTCAATGAGAATGATGCCGTCGCCGCCAATGCCAAAGTGCCGGTCGGAGAGCCGCACCGCCAGCTGAGAAGCCAGGTCCCGGTCCATGGGCTGCCGGGTGCAGTCAAAATAAATATAGTCGTTGCCGCAGCCGTGCATCTTGGTAAATTCCATCAGAAAGCCGTCCTTTCGTTAGCGAAAATCGTTGATGATCTTTTGCGCCAGGTCCGTAATCTTCAGCCCGGTGCGCATACTCTCCTTTTGGAGAAAACGGTGGGCCTGCAGCTCCGTCATATCCTGGGTGTTCATCAGCACCAGCTTGGCATTAGAGATCAAATCCTCATCCGCCTCCTTACGGCGGGTAAAGCTGCTTTTGCTGGAGACCAGCACCGCCACCGTTTGCAAAAACTCCTGCCGATCCAAGGGCAGGGTCAGGGTGATCAGGTTGCCCATATATTCTGCTTTGCCGTTCTTTGACAGTGCTACCACATCAAAGTCCGCAGGCAACTGCTCTGCCAAAGTACCGGCACCCATATCCCGCAGCAAAGAGGCACAGATGATCACGCCGGCGTCTTTCTCACCGGCAGCGCCCAACGCGCTGGAACCCAGGGCACAAATATGCGACACCCGGAACCCCTCGCCAACCAGCAAGGCACGCAGGCGCAGTGCCACCTCTTTGTTCGGGTACGCAATAATGATGTCCTTCATCTTCCGCTCCCGTTCCCCCATTAGATAAAAGTTATTATACCATATAAATACGCCTCGGTTCAATACAAAATGTGCACAGTTGCGCCCTGTGGGGACAAAAATTTTTGTCTATTCTTTACAGTCTGAAAGATTTGTAACAATATACACAAAAATGCGACAAATTTTACAAATTCTTGTAACAAACTATACGAAAATCCCTTGATTGACCGGTGCCAATGTGTTAAAATGAGAATGACTACAACCGAACTGAAAAGGGAGATGATAGAATGGAACAACTTAAAGAAGAATATCAGCTGCCGGTCTACCTCTTCCACGAGGGCAAAAACTATGAAGCATACCGTTTCTTCGGTGTTCATAAAATAAAAAAAGGTACCTACGCTTTTCGCGTGTGGGCGCCCCACGCCGTGGGTGTGGCTGTGGCCGGTGACTTTAACGACTGGTCCGAAACAGCCAACCCTATGACCCTTATTGCACCGGAGATCTGGGAAGCGGTGGTGGACGGTGTTTCCAAGTATGACTGCTACAAATACGCCATTCAAACGGCGGACGGTCGCCTGCTGATGAAAGCGGACCCTTACGCCGTGCACCAAGAGACCCGACCGGGCACCGCCTCCAAGGTCTATGACCTGCCCAGCTACAAGTGGACGGACAGCGACTGGTTTGCCCGGCAAAAAGAAGCCTCTGTGCTGGACAAACCAGTGAATATTTATGAAATTCACTTTGGCTCCTGGAAGCAGCACGAGGACGGCACATTTCTGACCTACCGGGAAATGGCAGACACGCTGGTGCCCTATGTAAAGGATATGGGCTACACCCATATTGAGATGATGCCCATTATGGAGTATCCCTTCGACGGCTCCTGGGGCTATCAGGTCACCGGGTACTTTGCCCCCACCTCACGCTATGGGGTACCGGAGGACTTAATGTACTTTATGGACACCTGTCACAAGGCGGGGATCGGCGTGATCCTGGACTGGGTACCCGCCCACTTTCCCAAGGACGCGCACGGGCTGTACGCATTTGATGGGGAATGCACCTACGAGTACAGCGACCTGAAAAAAGGCGAGCACAAGGAATGGGGCACCCGGGTCTTTGACTACGGCAAAAATGAAGTGCGTTCTTTTCTCATCAGTTCTGCCATGTACTGGGCCGATCTGTTCCACTTTGACGGTATTCGGGTGGACGCAGTGGCCAGTATGCTGTACCTGGATTACGGCAGAGAGCCGGGAGAATGGACCCCCAATAAGGACGGCGGCAACGAGAACTACGAGGCGGTGGACTTCTTCCGCCAGCTGAACAGTGCGGTGCTCACCCGCCACCCGTCCATGATGATGATCGCCGAGGAATCCACGGCTTGGCCCATGATCACCATGCCCCCGGATGTAGGCGGCCTGGGCTTTAACTTTAAGTGGAATATGGGCTGGATGAACGATATGCTCCGGTATATGAGCCTGGATCCACTGTTCCGCAAGGGCAACCACGACTGCATTACTTTTAGCTTTTTCTACGCTTTTAGCGAAAACTTTGTGCTGCCCATCAGCCACGACGAGGTGGTGCACGGCAAGTGCTCCCTAATCGGCAAAATGCCCGGCGAATACGACGATAAATTCAGCAGTATGCGCCTGTTCTTTGCCTATATGATGGCCCACCCGGGCAAGAAGCTGCTGTTTATGGGCAGCGAATTCGGCCAATTCAAGGAATGGGCATACAAAGAGGGACTGGACTGGCTGCTGCTGGATTACGAAAAGCACCGCCGGCTGCAAGCCTTCTCTAAGGAACTGAACCACTTTTATACCGCTCACCCGGCGCTGTGGCAGATTGATTACAGCTGGGAGGGATTCCAGTGGATCAGCTCCGACGACAACAGCAACTCGGTGATCGCCTTCCGCCGCATAGACCGAGACGGCAAGGATCTGATCACGGTATTTAACTTCACCCCCAACGATCACGAGGACTACCGCATCGGTGTGCCGGAAAAGGGCACTTATAAAGTGGTCATGGACACGGCGCTGAAAAAATACGGCGGCACCAAACCCCGGCTGTGCGGCACCTACAAAACGAAAAAAATACCTATGCACAATATGGAGCAAAGCATCAGCCTGAAACTCAGCGGACTGTCTGCCTTGTATCTTGAAAAAATAAAGTAAGGAGAACCACTATGGCACACAAAACAAATGTTGTTGCAATGCTGCTGGCCGGCGGCCAGGGCAGCAGACTGGGCGTGCTCACCAAAAACATTGCCAAGCCTGCCGTACCCTACGGCGGCAACTACCGCATCATCGACTTTCCGCTATCCAACTGCGTCAACAGCGGTATTTACACCGTTGGCGTACTGACCCAATATCAGCCGCTGGAATTAAACGACTATTTGGGCAACGGTCAGCCCTGGGATCTGGACCGCCAAAACGGCGGCGTACATATTCTCTCCCCTTATGAGGCCATCGGCGGCGCCGAGTGGTATAAGGGCACGGCCAACGCCATTTACCAAAACATCAATTTTATTGAGAAGTACGACCCGGAATATGTAGTGGTGCTCTCCGGCGACCACATCTACAAGATGAACTACGCCAAGATGATCGACTTCCACAAAAAGCACAATGCGGACTGTACCATCGCTGTGCTGGAGGTGCCGTGGGAGGAGGCCTCCCGCTTTGGTATTCTGGCTACCGACGAGGACGACCGTATTTACGAATTTGCCGAGAAGCCGGCCCAGCCCAAGAGCAACAAAGCCTCTATGGGCGTGTATGTATTCAGCTGGAGCAAGCTGCGCCAGTACTTGGAGCTGGACGAGGCAGACCCCAACTCTGCCAACGACTTTGGCAAGAATGTGATTCCCGCCATGCTAAACGCCGGCGAGCGACTGTTTGCCTATCCCTTCTCCGGCTACTGGAAAGATGTGGGCACCATTGACAGCCTGTGGGAGGCAAACCTGGATATTATCAATCCCAATGTAGATCTGGATCTGTCCGACAAAAGCTGGCGCATTTACAGCCGCAACCCCATGGCGCCGCCCCACTACATCGGCAAAAATGCGGTGGTGGAGAACAGCTCCATCAGCGAGGGCTGCGAGATCGAGGGCAACGTGGATTACAGCGTGATCTCCTCCAATGTGACCATTGAGGCCGGTGCCGATGTGCGTTACAGCGTGGTGATGCCCGGCGCGCATATTAAAAAGGGTGCCAAGGTGTATTATTCCATCGTGGCCGAGAACGCGGTCATTCAGGCGGATGCCAAGGTCGGCGAAATTCCCGAGCAGCTGCAAAACCCGGCAGACTGGGGCATTGCCGTTATCGGTGCAGGCGCTACCGTCACCGGCAAGAGGGACATTGCACCCGGTGAAATGATCAAAAGCGGCGAGGAGGTATAAGCATGAACGGAAAATCTGTACTGGGCATTATCTTTGCCAATATTCATGAGGAGGCGCTGGATACCCTAACGGCACAGCGCACCATGGGCTCCGTGCCCTTCTGCTCCCGCTACCGGCTCATTGACTTTCCCCTGTCCAACATGGTGGAGAGCGGCATTACCAAGATCGGCGTGATCACCAATGCCAACTTTCGCTCTCTGATGGATCATGTAGGCACCGGCAAGCCCTGGGACCTGAGCCGCAAGAACGACGGACTGTATCTGCTGCCACCGTTCTCCGTTAACTCCGCTACCATGTGGGGGAACCGAATTGACGCCATTTTCGGCAACATTCAGTTCCTGAACCAGTCCAACCAGGACTATGTGCTGATGAGCGACTGCAACCAAGTGCTGAATATGGACTACGAAAAGCTGTTTGACGCCCACGAGCAAAGCGGCGCCGATGTGACCATTGTCGGTGTGCACGGTGAAATGCCCACGCATGTTGGCTCTGTTTTGGTGTTTGACAAGGTGGCAGAGGACGGCCGCATTACCGGCATGAGCCTGTGCCCGGAGGGCCGGGGCGAAGTCTTTTACAGTTGCAACATCGTGCTGATGCAAAAGGCGCTGTTTGAGTCTTTGGTCACTGCCGCCCACAGCAAAAACGAAATTTCTTTCCAGCGCAATGTGCTGCTGAAGAATGTAGATCACTTAAAGATCCACGCTTACGACGCCAGCGACTGCTTTGTGGGCACCATTCAGTCCCTGCAAAGCTATTACGACATCTCCATGCGAGTGCTGGAGAAGGAGAGCCGCCACCGTCTGTTCAATCCGAACAAGCCCATTTCTACCAAGGAGCGGGACGATATGCCCTCCCTGTACGGCCCGGATTCCGCCACCAAGAACTCTTTGGTGGCCGACGGCTGCATCATTGACGGCACGGTAGAGAACTGCATTATCTTTAAGGGCGTCAAGATCGGCAAGGGCGCCGTGGTCAAGGACTCCATCCTGATGCAGGACACGGTGATCGGTGACAACGCCAAGGTAAACTGCGTGATCGCAGACAAAGATGTATCCATTAAGCACTCGGTAGAGCTGAGCGGCGCGCCCAACTTCCCGGTGTACCTGAGCAAAAAAACCAGAATTTAAGGAGGCAAATATTATGAAAGTTCTTTTTGTTGCCTCGGAGGCACTGCCGTTTATGGCCTCCGGTGGGCTGGGCGATGTGGCCGGCTCGCTGCCCGCCGCCCTGCGCAAGCGGCTGATCGGCTGCCGGGTCGTTATGCCCCTGTATGACAGCATTCCTCAGGAGCTGAAGGACCAAATGCAGTTCATCACCTCCATCTCCGTGCCGGTGGCCTGGCGCCGCCAGTATTGCGGTATTTTTGAGGCCAAGCACAACGGCGTGATCTACTATCTGCTGGATAACCAGTATTACTTTAAGCGGGACGGTATTTACGGCCATTATGACGATGCAGAGCGCTTTGCGTTCTTTGCCCGTGCGGTACTGGAGATCATTCCCGCCATTGACTGGAAGCCGGACATTATTCACTGCAACGACTGGCAAAGCGCCTTAACGCCCCTGTATTACAGCTGCTATTATGCCAACCGAATGGGGTATGAAAACATTAAAACCGTATTCACCATTCACAACATTCAGTACCAGGGCAAGTACGGCGACGAGCTGCTGGAGGATGTGCTGGGCATCGCCCCGGAGGACAACAATCTCATTCTCTACGACGGACTGGTGAACTTTATGAAGGCGGGCATTGAGTGCGCCAATAAAGTAACCACCGTGTCCCCCACCTACGCCAAAGAAATCCTGGATCCTTGGTACAGTTACGGGCTGGATCCCATTTTGAATCAACGCAGCTGGAAGCTGTGCGGCATCTTAAACGGTATTGACACCGAGCTGTACAACCCGGAGACGGATAAAATGATCTGGGCCAATTACAGCAGTGCTGACTTTGCCAACAAGGCCAAGAATAAAGAAGAGCTGCAAAAGAAAATGGGCTTGGCCGTGCGGCCGGATGTACCTGTTATCGGTATCGTTACCCGCCTGGTAGGGCACAAGGGCGTGGACCTGATGCAGGCCGTGCTGGAAAAGAGCCTGTGGGAGCGGGATGTGCAGTATGTGATACTGGGCAGCGGCGAATGGCAGTATGAGAGCTTCTTCCGTGAGTTGCACGACAAGTACCCGGACAAAGTGGGTCTGACCCTGGGCTTTGTGCCGGATCTGGCACACAAAATCTACGCCGGTGCGGATATGTTCTTAATGCCCAGCAAAAGCGAGCCCTGCGGCCTGTCCCAGATGGTGGCGCTGCGCTACGGCACCATACCCATCGTGCGGGAAACCGGCGGACTGAAAGATTCTATCACCGACAGCGGTGACGGCGAGGGCAACGGCTTTACCTTTAAGACCTATGACGCCTACGATATGCTGGGCGCCATCTACCGGGCAGTGGAAGTCTATAACCAACCCAAGGACTGGAAGGTGCTGGTACAGCGGGCGCTGAACTGCGATATGAGTTGGGGCAAATCTGCCAACGAGTATATCCGTATGTATCGCTCTTTGCTGAAAGACTAAACACAGACAAATAAAAAAACGAACACCGCGCGGTGTTCGTTTTTTATTTGCCTTATTTTGTTTATTTTGTTTTCACAAAGGGATTAAAATGCTTGCTGCGAATAAACAACGGCACATATTCAATCACTAAGTTTGAATTTTCCAGGCCGTACCATTTGTCCGGCGAGCCTGCCATTTTTCTGATCTTGTACTTTAAGCGCACAGCCAGTTTTTGCAAATGGGATATGTCGCTTTCCGGCGCCAGGGTTTTACGAATGTGATAGAACCGAAAGCTGCCGGTGGTTGCGTTTTTGTAAATAGAATATTTCCGCACCTGTTGCGGCAGAGCGCCGGTGGCCACCAGATCTGAAATAATCTGACGCAGATACACATTGACGCGCTGGGGCACCTTAAAGCCTAACCGAATGGTGACAAAAAACACATAGTCGGTGCCGTAAGATTCCACCGTATAGTCTGAGGTGAACGGCTCATCCGTCACCTGAATGTGAATAAACCAGTAAGCGGAGGCACGCTTCGGTCCCTTATCTAAGATGGAATATAGAATATCCCGATCCATATACTCCGGATCACTGTTGTTGGTAATATAAACCAAATTCTCACAAATTTGCGGCACAGACGCATCCTGGCGCAAAGCCTGAAGTGTCGGCAAGTACTGCCGCATCTTCAACGGCACGCCCTGCATACGCTCCACCTGCGTGCCCAAGTACCAAGACAACATAACCACAAACAGCGCTGCCGCAATCAGCACGGCAAAATAGCCGCCCTTGAAGAACTTGGTTAAACTGGAGACAAAGAAGAACAGCTCTATAAATGCAAACACCAAACCGATAACCACAGCGGCAATCCGGCGTTTCTTTCTCTTAAACAAATAAACCGTCAGCAAAAATGTGGTCATCAACATGGTCACGGTAATGGACAAACCGTAGGCTGCTTCCATATGCGCCGCCGTCCGAAACAGCAAGACCACCGCGCAGCAACCCACCCACATAACGGAATTCACAAGCGGAATATACAACTGCCCTTTTGTTTGAGACGGATATGTAATTTGCATATGCGGCATCAGATCCAAGCGAATCGCCTCTGAAACCAGCGAAAACGAGCCGGTAATCAACGCCTGCGAAGCAATAATGGCAGCAACGGTACTCAAAATAACCGCAAAGGGACGCATTTGCGGCGGCAGCATTTGAAAGAACGGATTCATACCGTCCATAGCCTGCAGCGCAGCATTGTCTTTGTTTGAAAGGATCCAGGCGCCTTGACCCATATAGTTCAGCAACAAGCACACCTTGATGAACGGCCAGCTGGTATAAATATTCTGCTTCCCTACATGGCCCATATCGGAATACAGCGCTTCTGCACCGGTGGTTGCCAAAAATACGCTGCCCAAAATCATAAAGCCGGCTTTGTTGTAAGGACTAAACAAGATGCGCACCGCATAAATGGGATTCAGCGCCTGCAAAATATACAAGTTACCGCTGATATGCGCCACGCCGGTTATGCCTAAAAACAGAAACCAAACCAACATAATCGGACCAAACGCTTTGCCCAGCAAACTGGTACCGGCTTTTTGGCAGGCAAACAAAACAGAAATAATAATCAATGTAATCAAGATGACACGATTTTGGTCATTATTCAGCAGTTGGTCAAAAACAGAAATGCTGTGCAAGCCCTCAATGGCCGTCGTAATGGTAACGGCCGGCGTAAGCACACCGTCTGCCAGCAGCGCCGCACCGCCTAACATGGCCGGAATGACTAAGTACTTGCCATAGTTCTTAACCAAGCTGTAAAGTGCAAAAATACCGCCCTCACCGTTATTATCCGCCTTCATGGCAACCACCACATACTTCACGGTGGTAATCAGGGTTACGGTCCAAATAATCAAGGATAACGACCCGATGATAAATGCACGGTTCACCGTTTGCAAACCGCCGTTATTTTCGATAATAGACTTCAGCACATACATAGGCGATGTGCCGATATCGCCATACACAACCCCGATGGTAACCAGCAGCATGGCCGGTGTAACCACTCGCTTTTTCAACGTCTTTTCTCCCATAAAATACACGCTTTCTGCTTCTTAATGCTCACTTTTTATTTACATCCACTTTTTGCGCTTAAAGACGGCTACAAGCACGCCAACCACAAGCGCAGAAAGCACAATCACACTGAAATATCCATATTTCCAGGTCAACTCCGGCATATTGCGGAAATTCATTCCGTACCAGCCCACGATCACCGTAAGCGGCAGAAACACGGCTGTCAACACGGTAAACAGCTTCATGGTCTCGTTCAGCTTTAAGTCCAGATAGGCCTGGTAAGCATCTCGCAAATGAACGATACTGTCTCGCAGCAGGTCCACATTCTCCCGCAGACGCACAGCCTTGTCCGTAAAGATCTTAAAGTACCGCAGATCCTCCCGCTCAAAGATCTCGTTCTCGTTCTCCTCCAGCGCCTCGCCGATGTCAATTAGCTGCTCATAGTAGTTGCGCAAGACGGACAGTTCCTTTTTCTTATGCAGCAACTCCATGTTGAAGTCCGAACCGGCCTTATCCTGAAGCACATACTCCTCCATCCGGTTGATCTCAAATTCCGTGTCCTCCAGCGCCTTATTGTCACCGGACACCAAACTTTCCAAGAACGCATAGATCAGCTTTTCCAGCGTAATATTGGCACAACTGAACCGGTGAAGCGCGCTGATAAATTTGTTGCGGGTGGAGCAGTCCGCGTCGTTAATATCCACCAGCAGCAAAAAATTCTTTTTAACATAAAATGCCAGGCAGTCCTCCCGGGCACGGGCATTGGCTGCGTCCGTAATCTTTAAGGTGCCAAAGCTGTAATCGTCGTACACTTCAATATTGGAGCGAAAATAGCGGTTCTCCTCCTTACACTGCTGTACAGTAGAGGGACTAAAGCCGAACTTCTCATAATGGGCGTCCAGCTCCGCCAAGGTAATGTATGCCGCACATACCAAATTGGGGTCTCGATCCTGCGGCTCAATGGTGGTCAGTTCGTCGCTGTATTGGTAAAACACTTGCCGTACCTCCCGATTTCCTGCTTTGCACCTATAAGTATATCCACTTTTGACCAGCAGTCAAGTCAAATAAAGCATTTATGCCAAAATGCCGTAAAGCAGAATTTGGATGAGCCGATCGTAACGATGCAAAAGTTCTTGCCGCTCCCGCTCCATTCCGGCCGTATCGCCCTCGGCTTTCAAATCCACCACCCGGTGCATATACTGGATCAGCAAGTGGTTATACATGACCCGCATGGTGCTGTAAAGCTCCTCATCAGACACATTCACCCTTTCATGGGCTGTATGAATGATCTCCAGCGTCTTATTCTTCATACATGCATTAAAGCGATGACTTTGTTCCATTAGTCGGCTACGCAATGCTTCGTTGGTCAAATGCAGGCAATACCAAATCAGAGACAGCGCTTCCGGGTCATCACACCAAAAATCAATACGTTCCTTGTAGTACGCATGCAAATTGGCAGCAATACCCTGCTCCGGATCCGGCGAAAATGCACATATATCTGCAACCAGTCGATCCACAATGCGTTGCACACAAGCCACAAGCAAATCGTCCTTGGAAGCGTAATAATGGTACAGCTTGCCCTTGGAAATGCCATTCTCCCGACACAGCTGGTTCAGATTGGCATTGTCCGGTCCCTGTCGGGCAAAGCTGTGAATCGCCGCTTCTTCAATACATTCTCGACTGCGTCGATTTTTTTCTTCCTGTTTCATGGATTGTCCATTCCTTTATATATTGCATCTCTTCAAGCCGGTCCGCTCTCCCACCGCAAAATCCAGAGCACACATCCTATTATACTGCGTCACAGGATAGCAGCTAATTATTTATAGCATATTCCGTAACTTTTGTCCACTTTTTTCCACTCCGCGGTCCTTTTGCCTACAACATACAGGCTGCGCTTTTTCATAAGGAAGGTTAAAAACCATCTTTCCCTTCTGCGCCATTTGCGGAGGTTCCGGTTTGTTTTTTAATCTCCCGTCATTTCGGAGCTTCGTTTTCTCTATAATCATTCTAAGAATGCAAACAGCAGTCCGCTTTTGTGATAAGCAAAAGCCACCGCCGGCAGATTGCTCTGCCGGCGGTGTTATTTTTATCCTTTATACTGTTGCTTACACCACAATGCTTAATCGGCAAGCACATACTGCTCAATGGCCTTGGCTACGCCGTCTGCGGTATTGGCCTCTGCCCGGTAGCGGGCGGCGGCTTTACATTCCGGCGCACCGTTCTCCATGGCAAAGGAGTAGTGAGCAAAGGCGAGCATGGGGCAGTCGTTGCCTGCATCGCCAAAGCTCATCACCTGCTCCGGCTCAATCTCCAGTTGCCGGGCAATACCCGCCAATGCCGCACCCTTGTTGGCGCCGGGAGCGGTACACTCCAATTCATTAGGCAGAGAGGAAACCACCTCCAGCCCCTGGCCCTCCAGCACAGACCGCACCCAATCCGCTTGCTCCGGGTTCAGATCATAAACGGCAATACTCTCTGCGCCTTTGTCCGCTTTGTCCAGCAGGTTCTCCTCCCGGTGCGCCTTGGCCATATACTGCTCCAAAAACGCCTGGGGCAAACTATTACTGCTGTAATAAGGTAGACGGGCTTCTTCCAAATACATACCGCCGTCCCAATACACATTATAATACAGCGGCTGTGGCGCCAAGGTTTGCAAAATGCGCTGCACTGCCTTTGGTGGGATCAGCTGCTGGCAAATATGGGCGTCGTTTTTCCGGTCATACACCGCCGCGCCGTTGGAGTAGATCACATAGTCTACAAAAGGCACCTGCGCCGTTACATGGTCAATAAAATCCAAGGTGCGACCGGTGGCAATCGCCAGGCACACGCCCCGGTCGTGGGCCGCCTGCAACGCCGCCACCGTGCGGGGACTGACGGTCAGGTGGTCACCGGACATTAAGGTGCCGTCTAAGTCTGTGGCAATCAGTTTGATGGACATAAACACGCCTCCGTTCTTCAAATACCGGGCATATTATAGCAAATTCTTGCCCTATGCGCAACGCAAAGCCGGGAAATCCGCAATTTTAGTTGACGAAACAAAGAAATTGTGCTTTAATTAGAGTTTGACAACCGCTGCAAACGCCACGCAGCACCTTTTTCCAACAGATGGAGGGATTCGGTTATGAAACGATGGGGCACCATACTCTGCCTTTGTTTGCTGCCCATGCTGCTGTTCTCTGCCTGCGCAGAGGCCACGGCACAAGTTGATTTTGTTGCCAACAAAGATGTTAAAAAGATCTTTGACGATGTGCACACTGTAGGCTACATTTTGGACGATATTCGTAAGGTGGATTTCTACAAAGAAATGCAGCCCAACGACAGCTACACCAAAAAGCAGGTAAAAAGCACGAAGCTGGACACCACCGTGACCAAATATTACAGAAACGAGGACCTGGTGTACGCCGCATACGAAAAAGGCGGCAAGCAGATGACCGAGTGCCACCTGCGCTCCACCCACTCCAACGACCTGACCGTCACCTATACGGACGCGGATGGCAAGCGCACCGGCGTGTCCATTCTCTGTGAGGACGATAAGGGCAGCTACCGTGTTACCTTTGACCAAGGGCTGAACACCCAATCTCCCTACGGTGCCGACCGCTTTACCATTTGGATCTCGCCGGAGGCGGACAACGCCACCTTTAACAGCGAATGCACCTACGAGGCGGTCTACGCCGACGGCAAACTCACCTGCACCTTGGTCAGCGCCAACTACTACGACAAAAAGGGCGGGTTCAAGCACTTCACCCACACCACGGACAAAAACGGCGTAACCCAGGAAAACAGCCAGCCGATTTACAACAAATCCGACGCGAACGAGGCTATGATCGGCGACAGCGTAGACATTCTGCGCCATGTGGAAAAATGGGACGGCGTAGAGGCTGCCCAGGTGCGTATGGGCACCCACGCCTTCAGCTACACAGAAAAAAAGGACATCACCTATTGGTACATTGACAGCCAAGTGCGCTTTCTCTTTAGAAATAAGGAAAAGGCCGCTGCTTTTAACGCCCGCTACGGCGGCAATGGGGTTAAGACCTTAAAACACACGGACGCCCCTTACGCGGTGAACTTCTCCCGGTGTAATTTACAGATTGCCTCCGACTGTACCTTCCCTGGTGACCAGAACCTGGGCGAATTCGCAGTAACGGACTTTAAGAACAATCCATACTACAATGTAACCTTTGACGCAGACGGCGTGCTCACCTCTTTCCAAAAAGTAAAATAACCCAATCGGCTCCCCTTGTGTGTGCAAGGGGAGTTATTGTATTAAAAGCAAGCGAATGATAGGGCGCAATCCCACCGTTTCGCTTCGCTCAGCACCTCCCTTTATAAGGAAGGCAAATCAACACAACTTGGCTCCCCTTATTTTTTAAGGGGAGCTGGCGCGCTTGCGCGACTGAGGGGATAAAAGCATAAGTAAATCCGCCCATTTTGCATACCCACGATGTAGGGCAGCGATGCCCGCATCATCCCGTAAACGGCCACACAATTTGTCAAAAGAATATACAACCGGTAAAACCCTGTATGCACCCGAGTATTCAAAAGTTGCGAAAGTATTAAATTTAAGCCCCATCCTTGTAATTACACCGGGGATATAGTATAATATTTCTGCTATAACACCTGACCCTGCGTCAGATAGAAACGGTGTACAAGTGAAGATTTTAACCATTGGCGATGTAGTCGCCCGGCAAGGCTGTGACTGCCTGCGCCATATACTGCCCGGCTTAAAGCGAGAGCTGGGTGCCAAATTAACCATTGTAAACGGTGAGAACTCCGCCGTGGGCAACGGCATACTGCCCGGCAGCGCCCAGTTTATTTTTGACAGCGGCGCCGATGTGATTACCCTGGGCAACCACGGCCTGCGCCGGCGGGAGATCTACCCGATGCTGGAAGAGAACGAGTTTTTGCTTCGTCCGGCCAACTACCACCCCTCGGCCCCCGGTCGGGGCAGCGTACTGCTGGATATGGGCGCCGCTCAAGTGGGGATCATCAGCCTGCAAGGTGCCGCCTTTATGGAGCCCATTGCCAACCCTTTTGACGCGGCGGACCGGGAGGTACACCGCCTGAAAGAAGCGGGAGCGCATATCATTCTCATTGACTTCCATGCCGAGGCCACTGCGGAAAAGCGAGCCCTTGGCTACTATTTAGACGGCCGTGTGTCTGCCCTTTTCGGCACCCACACCCATGTGCAGACGGCAGACGAACAGGTGCTGCCCGGCGGCACCGGCTACATTACGGACCTGGGCATGACCGGGCCTCAGCACAGTGTGCTGGGGGTCAGCCCCCAGGCAGCCATTGAAAAAATGCGCACCGGCCTGCCTGTGCGCTTTACCAATCCGGACGGACCTTGCGTGCTGGAGGGCTGCCTGTTTGACATTGACGAAAAAACCGGCAAGACCCGCAGCTGCACGCGCATTAGGAGGTAACCATGGGCAAGAGAAGTTTTGCTCTTTTGCTGGCACTGGTGCTGACCGCCACCCTCTTCTCGGCGTGCACCAAAGGCACCACCGGCCAAACAGAGACCACCGCAAAGGCACAAACCACCTTTGCTACGGACAATGACAATTTCAAATTAAGCTACACCCAATCGGACAGCCTGGATCCTTTTGCCGCCAAGACCCAAAACAATCAGGTGCTGGCGGACTTGGTGTTTGAGAGTCTGTTTGACCTGGACGGCAGCTATGCCGCCCAGCCCAACCTGGCCACCGGCTATGAATTTACAAACAGCACCACCCTCAAGGTGATCGTGCCCAGCGGTCTGACTTTCTCGGACAAGTCGGCACTCACCGTTGCAGATGTGGTATACAGCTTTGAGCAGGCCAAGAACTCCCCCGCCTACGGCAGCGCTCTGCAAGGAATTCGCTCCGCCACGGCAGAGGACAACAACACCGTGGTGTTTACCCTGCGCCACCCCTCCCCTTACGGGCAAAATCTGCTGACCTTTCCCATTGCCAAGGCAAATGCCAAAGGCAAGTATCCCATCGGCAGCGGGCGCTACCGCTACAAATCCACCCAGAACGGTCCGGTGCTGACGGCCAACGTGACCGCCGACTTTAACCCCCACATCACCACCATTCACCTGGTGAACATTGCGGCGGCGGACTCCATTGACAATGCTGTGAATATCGGCAACATCACCTATGCCTATCGGGATTTGTCCGAGAACAGCGCCAAGCGCATGACCGCCACCAAAAAGCAGATTAGCCAAAACAACTTGGTGTATATCGGCTTTAACAACCGATCCGGTGCCTTTGCAAACGCCCATTTGCGCAAGGCCGTGAGCCTGGCGGTGGACCGCAACGCTCTGGCTAAGAGCGCCTATGCCGGCTACGCCACCGCTGCCCGCAGCGTATATAACCCCGCCTTCGGATTGGCAGCCAGCACCCGCCTGTTTGCAGAAGCAGCAGACGCGGCAGCCGCCAAGCAGCAGATCGCCCTGTCCAAAGTCAGCGACAGTGCCTTAAAGATCACTCTGCTGGTCAATAAGAACGACAACCGGCTGGCCGCCGCCAATCAGATCAAAACGGCGTTGGAAGCGGCAGGCTTTACCGTACAGCTGCAAGTGAGCAAATTCAGCGACTATAAGGCGCGAATTAAAAATTTAAACTATGACCTCTATATCGGCGAGGTCAAGCTGCAAAACGATATGTGCCTTTACCCCTTCTTCAGTACCGACGGCGCTGCCCGCTACGGCATCAGCCAAGACAAGGGCAGTACGGCCGCCCTGTACCGGGACTACACCGCCGGCAAAACGGAGCTAGGCAAATTTATGCTCTCGTTTAGCGAGGAAATGCCATTTGCTCCCCTGTTGTACCGCAAGGGGATGATCTGCTACTCCAAGTCCCTGCGGGGCGATATTCAGGGGCAGTACGGCAACTTCTTTGCCAATATAGAAGACTGGTATTTTGGATAAAAACGCCCCGGCGTTTGCAATAAATCACGGAGGATATATTGATGATTAAATTTGAAAATCCCAACGGATACATTGAGATCACCAACGCCTATTTCGCCACCCTTGTGGGGCGTGCCGCTCAGTCCTGCTTTGGCGTGACCGGTATGGTCAACGGCAGTGCTTACGAGTCCATCGTCAGCGCCATTAAGAGCAAGGCCACCGGCGAAAAATTCAACCAAGGCGTGTCCGTCAAGAGCGTGGACGGTCAGTTGCAGATTGAGCTGCACATCTCCGTCTCTTACGGTGTCAACATCACTGCCATTGTGGACAGCATCATCAACAAGGTGCGTTACACGGTGGAGGAAGCCACAGATCTGAAGGTCAACACCGTCAATGTGTATGTGGACGCACTGAACTAACCATAGAATGGGAGAACATCACATGATGATAACAGGACTTATGTTCCGGGACGGGGTCATCTCCGGCTCAAACAACATTGCCAACAACCGCCAGGCCGTAGACGCACTAAACATTTTTCCGGTGCCTGACGGCGACACCGGCACCAATATGAGTATGACGATCGGCGCTGCCGCCAAGGAAATGGCAGTGCTGCCGGAGAACTGCACGGTGGAGGAAGCCTCTGCCCGCTGTGCCTCTGCCCTGCTGCGGGGCGCCCGGGGCAACTCCGGCGTCATTCTTTCGCTGATCTTCCGCGGCTTTTCCAAGGCGCTGCGTGGCATGGAAGAAGCGGACGGCGCTGCCGTGGCCGCTGCCTTTCGCAAGGGCGTAGACGCAGCCTACAAAGCGGTGATGAAGCCTACGGAGGGCACCATTCTGACGGTGATCCGTAAGGCGGCGGAAGCGGCGGAGCAAATTGCTGCCTCCAACAACGACGCCTGGACCGTGTGCTGCGCAGCCATGGCCGCCGCAGAGGAAGCCCTGGCAAAGACGCCGGAACAGCTGCCGGTACTGAAAAAGGCCGGCGTGGTAGATGCCGGTGGACAGGGCCTGGTTCTGATTTTCCAGGGTATGGGTGCCGTGCTTGAAAAAGGCACCGTGGTGCAACCCATTGCCGGCAGCGCCGTCACGCCGGTACAAACCCCGGACAAAAGCACCGTGGCCGCCGCCTCCGGTGAGATTGAATTTGGCTACTGCTCGGAATTTTTGATTGAAAAAGACCGCCACGCCCCCCAGCAGGATCCGCTGCGGCTGCGGGCGTACCTGGAGTCCATCGGTGACTGCGTTGTGGTGGTGGACGACAGCGATATTATCAAGGTGCATGTGCACTCCAACTGCCCCGGCGATGTGATTCAGGCTGCGCTGAAATACGGTCAGCTAATCAATATTAAGATCGACAATATGCGCTACCAGCACCGCAATGCGGAAGAGGGCGTTAAACAGGGCGACACACCGCCCCAACCCACCGTAGTGCAACCGGAGAATGACTACGGCTTTGTGGCCGTATGCGCCGGCGATGGACTAAAGGAGCTGTTTACCGACATTGGCGCCGACACGGTGGTCAGCGGCGGGCAAACCATGAACCCGTCCACCGACGATATTTTGAACGCCATTATGGCCACCCCCGCCAAGACGGTGTTTGTGCTGCCCAATAATAAAAACATTATTATGGCTGCCGAGCAGGCCATTCCCCTGGCCAAAGACCGTCAGGTGCGGGTACTGCAAACCAAGACCATTCCTCAAGGGATCAGCGCCATGCTGGTGTTTGACGAAACCCAGTCTGCCGACGACAATCAGATGGCCATGATGGACGCCGCCGCCCATGTGGAGACCGGCTCTGTCACCTTTGCCGCCAGAGACAGCGAGCTGGACGGCCGCCCCATTAAGCAAGGGGATATTATGGGTATGTGCGGCAGCAAGATCAAATTCCTGGGCAATGACATTGTAGACATTGCCTTTAAGACCGTTGACAAGCTGTTTAAGCGGGGCGAGCACGCCCTGGTGACCCTGATCTATGGTGCAGATGCCACCGAGGAACAGGCCCAGGAACTGGAAAACCGCCTAAGCGAAAAATATGGCAGCGATATGGAAATCAGCATTGTAGACGGCGGACAGCCCATCTACTACTTCCTGCTTTCTGTTGAGTGATATGGACCAGTTTTTAGAACGCGATATTCAATACCTGAAAGGTGTTGGCGACAAAAGAGCCCGGCTTTTTCATAAGCTGGGCATATTTGTCGTGGGGGACCTGGTGCGCTATTATCCTCGCACCTATGAGGACTGGAGCGTGACCACCCCTGCCGCCCAGGCGCCGGAGGGCACAACCGTTTGCGTGCAGGCCACCATGGTGACCCCCATGCGCACCCATCTGATCCGCAAGGGCATGACCCTCTACAAAGCGGATTTTACCGATGGGGAGACTCTGATCCATGTGACCCTGTTCAACACCAAATTCTTGGCAGAGAAGCTACGCATGTACCAGGACTACCTGCTGCTGGGCAAGGTAGAGCGCAACTTCACCACCGTGCAAATGAGCGCACCCAAGATTGAACCGCTCACCGCCCGGCGGATCCACCCCATTTACACCCAAACCGGCAGCCTGAATGCAAACCTGATCGCCAAGGCGGTAGACTACGCCTTGGCACACATGGCGCCGCTGCCGGACACCCTGTCCCCCGCCCTGCGGGAAAAATACGGCCTGGAAGACCTGGACACGGCCGTGCGAAACATTCACTTTCCGTCCAATGCAAAAGCGCTGGAAGCAGCCCGGCACCGACTGATTTTTGAAGAACTGCTGACCCTGACTGTCGGATTGAAAAAACTTAAGGGGCGCAAGCGCACCCCCACCACCCGGGTCATTAAAAAGGACTGCACCGCTGCCTTTGCGGCCCGTCTGCCCTTTACCCTTACCGGCGCCCAGAGCCGGGCAGTGGCCCAGTGCATTGCCGACCTGCAAAGCGGCTATCCCATGAACCGACTGCTCCAAGGAGATGTGGGCAGCGGCAAAACCGCCGTGGCTGCCGCTCTGCTGGACACGATGGTGCAAAACGGCTACCAGTGCGCCCTGATGGCACCTACGGAGATTTTAGCCACCCAGCACTATGCCACACTGCAAAAATTCTTTGCAGGCACAAACACCCGCCTATGCCTGCTCACCGGCGCCTGCACCGCCAAGGAGAAGCGGCAAATTAAGGCAGATCTGCTGGAGGGCAATATACACATTGCGGTGGGCACCCACGCGCTGATTCAAAATGATGTGGAATTCGCCAACCTGGGGCTGGTCATCACCGATGAGCAGCACCGCTTTGGGGTGAAGCAGCGGGCGGATTTGGCCATGAAAGGTGAAGAAGTGCACACCCTGGTAATGAGTGCCACGCCCATTCCCCGCACCCTGGCCATGATGATCTACGGCGATCTGGACATATCCGTGCTGGACGAGCTGCCCCCCGGGCGGCAGGAGATCCGCACCGATGTGGTCACCTCCGCCTACCACGCCCGGATCTTTCGCTTTCTGCGTGCGGCGCTGGATCGAGGCGAGCAGGGCTATATCGTCTGCCCGCTGGTAGACGAGGGCGAAAGCGAGATGAAAGCCGCCACCGCCTACGCCGCCCAACTCAGCGAAACGGAGCTGTTTGGCTACAACTTAGGGCTGCTCCACGGCAAAATGACCCCCAAACAAAAGGACGCCGTCATGCAGGCCTTTGCCCGAGGCGATGTGCAGGTACTGGTAGCCACCACAGTGGTGGAAGTGGGCGTAGATGTACCCAACGCCACGGTGATGATCGTGGAGAACGCCGAGCGGTTCGGCCTGTCCCAGCTGCACCAGCTGCGCGGGCGCATTGGCCGCGGCAGCGCCAAAAGCTACTGCATACTGGTCAGCGACGCCAAGGGCGATACGGCCCGCCAGCGGCTGCTAACCATGAAAAAATACAGTGACGGCTTCCAGATTGCCGACGAGGACCTGCGGCTGCGCGGCCCCGGCGACTTCTTTGGCAAGCGGCAGCACGGTCTGCCGGAGCTGCGACTGGCAGATATGGTGGAGGATATGGACACCCTGCGCCTGTGCCGGGACTGTGCAGACACCATTTTGGCCGACGACCCCAATCTGGACAAACCGGAAAATCAGCCCCTGCTGACGGAAACGCAGGATCTGTTCCGCCGTAGCACCACATAAAAAGCAGACAGTGATTGCGATCACTGCCTGCTTTTTTAGCACAGGGGACGGTTCCTTGTCTTGCGGGTTTGACCCCGCCATCGGCCACCAAAGGCTCTTCGCAAGATGCGAGGGGCCTATTTTTTGCTCTTTCGAATCAACTTTACAGAATACCATTTATCTGTTAAAATAGAATCGCAAACTCTGTATTTATTTTGCTATCTGTGAGATAGGGCGTATGAGAAATATGGGAAAAGTGTAAAACAGGGAACCATCCCCTGTTTTATGTGGAAAACATTCGTTAAATTTGCAAGATACTTTGGATATTCAAAAATCCGAAGCACTAAATGGGGATTATAAGTAATATATGATGAAATACAATTTTTTAGAAAAAGTATTATTACTTATAATGCTGTACTCGGATTTGTTTTATTTAAAATATAAATGGACTTGTGATAATGTTTCCGTCCGCAAAATAAATCCGAATAAATATTTCCAACCCATTTTATATAAGTTATACGGCTTTAGAAAAAAAGTTGAATTAGGTTTACTGATTTTAGAGACCTATTCTCATTTTGTTTCCATCATTGTTTTTATTGAAACCATTGTTGGCTGTATTTTGAATACATCATTCCTAAAACCAATCATGCTATTTTCTTTTTGGTTAATTAGTGGCATATTTGTAATAATCTATTTAATCATTAATTCCGTAAAAAAATAACGACATAGAACAGGGAACGGTTCTCTGTTTTATTACCTTTTTTCAGACTTGGATACACCGTATAAGGTGTTTGAAATTGTTAAGTGGTTAGCCGATTCACGAAAATGATGCAGTATGAGGGTTTCTTGATATGACGAAGCGAAAAAAAATAGTATGGAGTCTAATCGCAATAGCGGTATTGATTTTGCTTGTTGTATGCGCATATATGGTGTCCGTTCCCAAACTCAATATTGTTTATGAGGTTGACGAACACACATATTATCAGTCCTCAAGATCCATTTTTCGGCATGAGATTCAAGTAAACGGTTATGACCAGGTTAGCAATGTTTTGTTAAATGATAAAGAATTGTATGCAACTGCCCAAAAAGGCGATCATAGATATTTTTTGTTTCATGACGAAGCAGCCGATACTACAATTGCTGTGTCTGACGAGGATCATGCCTTCAGTAGGATCTATGCCAGTTTTATGTACAATGGGCGATATACGGTTGAATATGAATATGCAGACGGCGAAGAAGAAGCGAAGCGTATTCTTGTATCCATTGATTTTGAGAACAAGAAACGAATTTCGATTGAATTGCCGCAGCAGGTGCTTGCCGGAAGGATCGTGTCTGATGGACGGCGTATTTTTGGGTCGGATAAGGATTATGTGTATTTGCTCAATGAAGATAAATCAGTTAAACGCATAACTATGGGTAGCGATGTTATCTCCGTTCAGGATGAAGTGCTGTATTATGTATTTAACGGAAAGTTGTGCCAATATGACCTGAACGCACAAACAAATTCGCAGGCCCAAAATGGTCCCGACCTTCTCGAGTACGATTTGATTGACCCGGATTCATTCTACACTGTACAAAACAAGTATTTTGTTGGGTGTAGGCTCAGCGTATTTGCTTATAGTGATTCCCACTCATTTCTTACCTATACAACGATCTATGATTTGCAACATGGAAAGAAGTATTTGTTTATGGGTAATTTGGGTAGGATTGCCAAAAATTTTCAGTTATTAAATGCGGATTAGTAAAACAGGGAACCGTCCCCTGTTTTATATTAGAGGGTTATATAACAATGCAAAGCAAGCGTTATGCTTTTTTTTATGGTAGCCAAGCGAAACGATATTTGGACCGGATCATAACATTATTGGTTTATGTATTATTTTTTCCGGTCGTTGCTCTCATACTTTTTTTACCTCTTGGATATTTGGTGAATGAGTATCAAGAGGGCTCGGTAGATATGATTGTGCGCATATTGATCTATGCTTTTCTTGTGTTCCTGTCGGCTTTGTTTATAGCGAGCGTGGTATCTGCACTACTGCCACAATACACAGTCGTTACAGACCATTCGGTACTGATCAAACGCCACAATATTATGTATTACCATCTCAAACGTGGCACCAGTGATTTTATCCCCATACAGCAAATATCAAGTATTCGACCGGCCACGCCTTGGCGAGGCAAATATGCACCTGTTCCGGCTACCATATATGCATGGAAATATATGGTCGAGATCCATGCAAATGAGCAAATATATTATGTTCCGGTGGAAGATGTTCGTGCATTTATTGATGATGTCAATGCGCGCCGCCAGATTCAGAAATGAACAGGGTAAAACAGGGAACCGTCCCCTGTTTTACCCTGTTTTAAGTTTGTTGCTTAAAATTTAATTCTTCTGCCAATTCGGCTGTTTTTGTACTGTCTGCACAATCCGGAGCAGTTCACCGATCACTGCCTGCTTTTTTACTATAATGCTGTGGTAAAGGTGTAGCCCTGGCTGCGGATACTGTCAATGGCCTGACCTAAAATCTCCGCATTGGTGGGACTGACGGCATGAAGCAGGAAGATGGCGCCCGGGTGGGTGCTCTCTGTCACCTTTTGCAGCGCCGCTGCCGGTTCCGCCACATTTTGGGTATCCCAATCTGCATAGGCAAAGCTCCAAAAGATACTCTTGTAGCCCAGCTCCTGGGCCAGCGCCAGCGTGTCCTCGCTAAACTCCCCCTTGGGAAAGCGGAAGTAAGTCATCTTGTAGTGATAATTCTTCTCCATATACCGGTGCAGCACGGTGATCTCCTCTGTGGCTGCCGCGCGGGTCACCTCGTCCATAGTCAGGTGGCGATAGGTGTGGTTGCCCACTACATGACCCTCGGCAATCATGCGCTTGATCAGCGCCGGGTTTTGGCTGGCAAAGTCATAGGTCACAAAGAATATAGCATGGACTTGCTTTTCCTTTAGCGTGTCCAATATCTTGCCGCTGTATCCGTTCTCATACCCCTCGTCAAAGGTCAGGCACAACTGCTTTTTATTGTCCAGCAAGAAGCGAGCGCCCAGCGCACCAAACTGCTTTTGCAGCCGTTCCGGCTCCTGCGGTCTGGCGTGGTCGGCAATGTTGCCCGGCCCCCACACCACCTTTTCCTTGCTGTAACTGCGGCTGCCCACATTGGTAGGGCGCACGGTGGTGTCCGCCGTTTTGGTTGCAGTGGTGGCAGAGGTGGTACTGGTGCCCGGATCGCCGGTTTGGTTCTCATTCTTTGCATTGCCCCGGCAGCCGGTAAACAGTACGGTGATCAGCGCTAAAACCAGCAGCAAACTGCTGCATTTTTTGAGCATAAAAAACTCCCCTTTCAGCAATAGGTTGTGCTGAAAGGAGAGCAAATTCACCTGTTAAATTTTGATTAGCGAAAATTGGCGATGTTTGCAAAAACTGCAAATCATTCGTTAATAATATTCCACCCGGCGCGCAAAATGCCCTCATCCTTGCCAATGCGGTTAAGCACATTCTCAATGGCCTCATCGTTCTTCTTGGCGGCAGACACATAAGCGCGGATTTTGGTATTGCCGTCGTCCGTCTCCGAGGACTCCAAATTGTGCAAAATAATGTCCCGCGCGTCCTTCAAAGCACTCATTAAGTGGGCGCGAATGTCCACCTCAAAGTTATCCAAACAGGTCACTGAGATTTTATACATACACTCATCTTTGGCCCGCTTTTCTTTATCATAGCTGCGCAGCTTGTTAATCTTGTTGCTCAGCGGATGCAGCACCAGGTGCAGCACCACCACAGCCGCTGCCACAATCACCGCATACAGCACCTTGGGCAGGGTGCACAGAATGCCGATGGCTGCCGTGGTCCAAATGGTAGCGGCAGTGGACAGCCCGCGAATGTTGGTGCCGTCCCGCAAAATCAGGCCGGCGCCCAAAAAGCCCACACCGCTGACCACCTGGGCAGCCACACGGGTCAGGTCCGTGTTGTCCTGGTGGATCACAAAGGAAAACGCCGTGTAGGCATACGCTCCCACACACACGATCACATTGGTAAGTATACCCGCCTGGTGCTTGGTCCACTGGCGCTCCAGGCCTACAAAAAAGCCCAGAATAATGGCCAGCGCCAGCCGAATGGAAAAACCGGACAACGCCGTAATATCCATCAAATGCGCATAGCGTTCCATTTTAAATTAAGCCTCCGCTTTCTCTTCTGCCTCCTGGGCAGATTTTTGTTTTAAGTAAGCATTGATAAAGCCGTCAATATCCCCATCCATCACGGCGGTGATATTGCCCATCTCAAACCCGGTACGGTGATCCTTAGCCAAGGTATAGGGCATAAACACATAGGAGCGAATTTGGGAGCCCCAGGCGATCTCTTTCTGGTCGCCCTTAATGTCCTCAATGCGTTCCAAATTCTCCCGCTCTTTGATCTCCACCAGCTTGGACTTGAGCATACGCATGGCCACTTCCCGGTTTTGGTGCTGGCTGCGCTCAATCTGGCAGCTAACCACGATCCCGGTAGGAATATGGGTCAAGCGCACGGCAGAGGAGGTCTTGTTGACCTTTTGGCCGCCGGCACCGGAGGCACGGTACACATCCATCTTAATATCTTCTTCACGGATCTCCACATTCACATCGTCGTCAATCTCAGGCATCACTTCAACGGACGCAAAGGAGGTATGCCGCCGACCGGAAGAGTCAAAGGGAGACACCCGCACCAGCCGGTGAATACCCATCTCGCCTTTTAAATAACCGTAGGCATTCTCGCCCTCTACTAAAATCGTGGCGCTCTTGATTCCCGCCACATCGCCGTCCAGATAATCCAGCGTAGACACCTTGTAGCCATGGCGCTCGCCCCAGCGGTTGTACATACGAAAGAGCATTTCCGCCCAGTCCTGCGCCTCCGTACCGCCGGCACCGGCGTGGAAGGTCAGCAAGGCGTTTTTACCGTCAAACTCGCCGCTGAGCAGCGTGGACAGGGTCATATCTTCAACGCGCGTTTCAATATCCTTAACAGAGGCGGTGCAGTCGTCCAGCAGGGACAGATCGCCCTCCTCGTCCGCCAGTTCAATCATCACCAGCGCGTCCTCATAGTCGCTTTTCAGGCTCTCATAGCCGGTGACCTTGGCCTTTAAGGAACCGATCTTTTGCATCACCTTTTGGCTGTTCTCCATATCGTCCCAAAAGTCCGGGGCGGCGCTCTCTTTCTCCAGCACCTCCACCTCGGCCTTTAAGCTGTCAATGGCCAGGGCTTCCTTTAAGTTTTCAATGGGCTTCTCGCTGTCCAGCAGCCGCAGCCGCAGTTCTTCAAATTCTACCATATCAACGCTCCGTGCAGTTCTCTATATAAATTTATGATTATAACTGTAATATTATATATAAATCTCTGTTGCATTGCAAGGGCTTTACCGCTGATTTTACACTCGGGCACGGATTTTTGGCGGAATTGACGGTGCTTTCACACTTTGTTTAAGATATTTTAACCAAATCGTTGATTTATTGTGATAATCTAATGTATAATGATAAGAAAGCATATAGATCGAGGTACACAAAATGGCTTTGTATGAAAACAACAGCTGCCCGGTCTGCGGCAAGCAGTTCCAACCGGGTGACGATATTGTTACCTGCCCGGAATGCGGCACACCCCATCACCGGGCGTGCTACCGGGAGCTGGGGCACTGCGCCCACCAGGCACTACACGGTGATGGATACGCCTTTACCCCGGCGGATCCGCCTGCGGAGCAAAAATCAAGCGCGCCTGCCGACGATACCCACACCACTGCCCCGGAGCAAAAAAAGAAATGCGTGGCCTGCGATGCCGAGCTGGACGGAGACGCCGTCTTTTGCACCCACTGCGGCGCTCGACAACCGGGTGCCGGCGAAAAGTATCGCCCGCCTATCCTGCAGGATACGACACCGGATCCCAGCCAATACCCGGGCACCATCGAGGGTGAAGCGGCCGCCGATGTGGCAGCGGTGGTACGCACCAACACCGGCTACTTTCTTCCCCGGTTCAGACGGAATAAAAAGATCGGATGGAACTGGGCGGCCTTTCTCTTTGGCCCCTACTACCTGTTCTTCCGCAAAATGTATAAAGAGGGCACGGCGGCACTGGCCATTCGCTTTGCCGCGGCACTGATCGTGCAGGGCGCCTACGCCAGCCAATTTGCCAAGCTCACCGACTTTATGAGCACCAACTACACTGCCCTCATGCAGGGCAAAATACAGCCGGACGCAGCGCTGGTGGAGCCCTTATACCCGGCTGTAGCCATCTTGATGGGCGTAGGGCTGGCGATCCACCTGGTGATCGCCCTGTTTGCCAATCGGCTATACCGCAGAAAAGTATTTACCGTGCTACAAACGGTGGATGATCGCCTGCAGGACGGCGCCATCTTTCGTCAAGCGCCCATGCTGCCGGAGCAAATGCGTCTGACCCAGGATGAAATGCGCCGCATGTATCTGTCCAAAATGGGCGGCACCAGCGTGTTTGCGCCGATTATGGCGTTTCTAATCTTGGACATGATCTCCGGACTGCTGTCCAGCATATTGTAAAAATACCAAACGAGGAAAAGAAAAATGAAAATTAAAAAAGCAATCATTCCCGCAGCAGGGCTGGGTACGCGCGTGCTCCCCGCTTCCAAGGCCGTGCCCAAGGAAATGCTCAACATTGTGGATAAACCCGCCATTCAGTACATTGTAGAGGAGGCGTTCGCCGCCGGGATCGAGGATGTGCTGATCATCACCAACCGGGGCAAGGGGGTCATTGAGGACCACTTCGACCACGCGGTGGAGTTGGAGCACAAGCTCTCTGGGGATCCAAACAAGGCGGATCTGTACCGAGATGTGCTGCAATGCTCTCAAATGGGCAATATTTATTTTATCCGCCAAAAGGAGACCAAAGGTCTGGGTCACGCGGTGCTGTGCGCCAAGAACTTTGTAGGTAACGAGCCTTTTGCGGTGCTGTATGGGGACGATGTAATCATCAGCGACGACCCGGTCACCGGCCAGCTTTGCCGCGCCTATGAGAAATACGGCAAGGGCGCTGTTGGCGTAAAGGAAGTACCCACGGCGGATATTACCAAATACTGCTCCCTGGCGGTTGCGCCGCTGGAGGGCAACTGCTTTACCTGCACAGATATGATCGAAAAGCCCCGGCCGGAGCAGGTAATGAGCAACTATTCCATTTTGGGCCGGGTGGTGCTGCCGCCCTCTATTTTTGAGATTTTGGAGCACACCCCCAACGGCGCCGGCGGCGAATTGCAGTTGACGGACGCCATGCGCACCCTGGCGCGGCAAGAGGGCGTAGTGGCTGTGGACTACAACGGCACCCGCTACGATATGGGCAACAAATTCGGCATTTTGCAGGCCAATATTGAGGTGGGTCTGCAGCACCCGGAGACCGGTGCCCGTCTGAAAGAATACATCAAGAACTTAGCAAAGGAACTTTAATACCTATGATCAAACTGGAACGCACTTCCGTCACCAATTTTGACAATGCCATGCGCGGTGCCCGCAATCCCATGAACTCCTGGGGTCGTTACGACTCCTACTATGACGAAGACGGCAATTTTGTCTTTGGTCCCAACGATCTGAGCCTGGCCAAGCGCCTGTGCAAGGCCGGCACCGACCACCGCAAATTCATTCGTATGATCTTTGTCACCGTGGATGTAACCGCCCCCATGTACTGGTGGAAAGAGTATGACACCTACAAGGTGGGTACCGTTGCCAATTCCACCTCCACCATGCACAAGATTGCCTCCAAACCCTTTGAGCTGGCAGATTTCTCCGTAGATCACATGGATCAGCGGGGGCTGGACGCAATGGAAAAGGTAATCCGCACCCTGGAGCAGCTGCGCCTGGAATACCTGGAGACCAAGGACAAACAGACCTGGTACACCATGATCCAGCTGCTACCCAGCTCCTATAACCAAATGCGCACCTGTACGCTAAACTATGAGACCTTAGCCAATATTTATTTTGCCCGCCGCAGCCATAAACTGGATGAGTGGCACACCTATTGCGACTGGGCGCTGGAACTGCCTTACTTTAAGACCCTAATCGCAGATACAAAGGACTGACAACACCATGAACCAACAATACGATCCGTTCGGCAGACCCACAAACGGCGCTGTGCCGCCCAATAACGGTCAAACGCCGCCCGGTCAAAGCCCCTACAATCACTATAACAATCCCGGCGGGTATCCGCCCCCGGGCACCGGCTATCAACCGCCGTACGGCACCTATGGGCAGGACCCTCGGCAGGCTACCTACTTTCAGCGGGAGAACCGGCGGCGCCTGGCGCTGCGTTCCCAAAAGCAGGAATTGCGCCGCTTTGGCAACTGCATTGGACTGGCGATTTTAGCCTACTTCATCTTACAACTGCTGTTTTCCCAGCTGCTATCTGTATTGCACATGAAGGATATCTATGAAAGCTCAACGGTTTTTCAAAGCTGCTTTAGCCTGCTGTTCATCTCCGTTTGCAGCGTGGCGGTTCCCTTTGGCGTAATGGCACTGATCAACCGCCGCCGCTACACCGGTCCGGTAATCCCCACCCACTCCCTGCGCACCGGCCAAATGGCGTTATGGGTCAGTTTCGGTATGTTGTGTTGCGTGGGTGCCAACTTTGCGGTCACTTTTGGAGTGATCCCGCTGTTTAAGGCCTTTGGCTATGGATTAACCTCCAACAGCGCCGGCGATCCAAACTCCGTTTTTGCCTGCGTGATCGCCTTAATCGGCACGGCCATCGTACCGGCTATTTGCGAGGAGTTTGCCATGCGATGCTGCTGCGTGCAATTGCTGCGCAAATACGGCAATGGCTTTGCGGTGCTGAGCATCAGCATCGTATTCGGCCTGCTCCATGGCAATGTGATCCAATTTGTCTTTGCTTTTTTGGTGGGTCTGATTTTGGGCTATATCACCGTCAAAACCGACAGCGTTGTGCCTGCGATCCTGGTGCACGCACTAAATAACGGTATGTCCGTAGTCGCCGGCATTGTGCGCTACGCTGCCACCGACACGGCCGCCGACTCCGTCACCGTGGGTATGTATGTGTTTTGGCTGCTGGTAGGCGCTGCCGCCACCATTTACCTACTGGTAAAAAAGCAGCTGTACACCCCAAAAGCCCAAGTGGCACCAAACCCGGAAGCCCCAACCTTTGGCCAGTGCATGGGCGCGTTTTTTGGCACCCCGGGTATGATCGTATCCTTTATTCCGCTGGTGGTATTGACCATCTTTTCCATTCAAAAGCTGTGATTTTATGACAACGGATCAACAATTTATGTCCCGGGCGCTGGAACTGGCCCGGCAGGCCGCGCTGGAGGGTGAAGTACCCGTTGGCGCCGTGGTGGTGCTGGACGGCCGGATCGTTGGCGAGGGACGCAACCGGCGAGAGAAGAGCCGCAACGCCCTGTCCCATGCAGAATTAGAGGCCATTGACGCTGCCTGCAAAGCCTTAAACGGCTGGCGATTGTGGCAATGTGACTTATATGTCACATTGGAACCATGCCCCATGTGCGCCGGTGCCATCATCAATGCCCGCCTGCGCCGGGTGATCTACGGCACCGCGGACCCTAAGGCCGGGTCCTTTGGTTCCGTGATCGACTTTAATTCCCTGCCCTATAACCACAAGCCGGAACTGACCGCCGGTGTGCTGCAAGGGGAATGTGCCGGTGTGCTCAGCGACTTCTTTGCCACCCTCCGGGCTCGCCGCAAAGCAGAATCCGCAACCAAAACAGAATAATAAAAAAAGAACACGGAAGCACCGTTTGGCGCCTCCGTGCCTTTTTTTGCGGCTTACGCCGCCGGGAGCCGCCCTGCACGCGGCTCAGTTCTACATTTGTCCGCTTATTTCATGGACTCTTCGTAGGCCTTGATCATTTTCTTAACCATCTGGCCGCCTACGGAACCGGCCTGCTTAGAAGTCAGGTCGCCGTTGTAGCCCTGCTTCAGATTTACGCCCACTTCAGAAGCAGCTTCCATCTTAAAACGGTTCAGGGCTTCCTTAGCCTCGGGCACAACACTCTTGTTGCTTGCCATTGCGAATACACTCCTTTTTCGTAAACTTGCGTTTGCACCAATAGTGTATGTGTCGCAAAGACAAATAAAACTGAAAAATTTTTACAGTTGGCTGGCAACGAACCGTTTCGTTTTGCCATCTGTTTTTGAATTTTTGTACAAATGACGCAGTCGCGCATTCGCCGGGAAGCATTTGTTGTAATGCCCCCCCGGAGAGCGGCCGGAAGGGATAGCCCACCGCTTTCTCGCTTAAATTCCCGCGGCGCTACGGCAAGTGCACGGCGCTAAAGTTGATGATGTGCTTATGAAATGCATGCGGCGGAGTCAAAAGACTCCGCCGCCATATTGTACGCATTCTGATTTTCGTTTGTCTTACTGCACTTCCTGCACGGTGGTCTCCGGCTTAGTTGTGCTTTCCGGCTCCGTGGTGGTCTGTTCGGCGCCGTACACCTGAAGCACCACCTCGCTACCCACGGCAGCAGTGCTTTTGGCGTCCGGGGTCATACCGTACACACTCTTCACGGTGCCCTCTTTATAGCTGCCGTCGTTATAGACAGTCACGGTGGTCACCTTAAAGCCCTTTGCCTCCAACTGTTTTTTGGCCTCTGCCACATCCAGACCGCCTACATCCGGCACTTCCTCTGTCTGAATTCCCTTGCTCACCGTCAGCACAATCTGCGTGCCCTGGGCCACACTCTCGCCCTTCTTCACGCTTTGCGCGATGATCACGCCTTCCGCTGCTTTGTCTGAATACTGGGCGTCATAGGTGATGGAAAACTGCTTGTTCCATGCGCCGTTGTTCTTAATGTCACTCTGGGTGTACCCGGCAGACACAAAGTCCGGCACAGTATAATTTACAGAGGAGACAGTCTGCGTGGTATTCTCTCTGCCATCCACCAGGCCGGAAAACTTTACCACATAAATACCCGCTGCCACGGCAGCCACAATCAGCACCACTAAAATAATAATGACAGCCTTATTTTTGCCGCCCTTGGGCTTCTCTGTCGGAGGGGCGCTGTGGCGCACATCCGGCTGGGGTACAGGTTGAGGCTTTGGCTCCGGCTGGGGCGGCTGGGCTGCTTCCGCTGCTTGCGCCACCACAGAAGGTGCCGCATTGAGCAGCTCCCGCAGACGTGCTGCGCTCTGTGCCCGGTTCTCCGGGTAGATCTGCAACCCGGCGCCAAGAGCACGAATCACATGGGTGGGAATACTCTCTGCGATCTTGTTGGGAATCATCAGCTTGTCATTGGTCTCTCTGGACGGAGCATCCGGTGGATTGCTACCCACCAGTGCCCGATAAATACAAGCGGAAAAGGCATAAATATCCGTAGCCGGGCACATTTTGCGGTCATTGTCGTACTGCTCAATGGCGGTATAGCCCTCGTTCAAATTAAATTCCAGATCAGACTGCACCGTATTGCACTGGGCGATACAAAAGCCCTTGAGACGCACCTTACCGTCCGGGCACAGCAGCAGATTGTCCGGCGTAATGGAACCATGGATCACACCCCGATCATGGAGTGCCTCCAGGGTGGTGAGCACCGGCATAAACATAATGCGCGCCTGCTCCCAAGAAATGTAGCCCTCCGGGGTGCGCAGCAAAAATTCCCGCAAGGGCACGCCGTCCACCGGCTGAGACACGGCATACACCGTCTCGTTGGCAGGGAACACATCATACACCGGCAGTGCCGCAGCCAGGGTGCGCAGCTGCATCATGGTCTGCCACAAAGTGGTAAAAGACCGCTTATAGCCGTCAAAATTCTTACGAAAACGCTCCCGCACATGCACCTCCCGGTTGCCCTCCAACCGATTGGCAATGCCCTTGGGCAGGAACTCCCGCACCACACAAGGCGCCTGCAAGGTACGATCATAGGCGGCATACACCGCAGCGTCGCTCTCCCAAGCCTGCACATGGCCCAGCACATACCGGTCCTGAAGCACCGTGCGCAGGGGCAGAAAGCTGGTGTCGTTCTCCTGATCGTTATCAAACCCGCAGCCGGGGCAAACGCTGCCTGCGGTCAGGGGCGCAAAACAATTCATACACAGTCGATCTGTATTTTCCAAAAAAGATCCCTCCAAATCAAGACCTTATACTATAGCAGTTTTATAATAACAGCCGGTTGATTTTTTGTCAACCGCACTTTCGTAAACAATCGGTAAACATCCCCTACCCCGCCGGTTGAAACCGCGCATCTTTTCGTGTATAATGAGGGATACAGAACAAATGAACCGAAGGAGTTTTTGAATATGAATTTTAAGCAGTTGCCAAACGGCATGTGCGAGGGCTTTGCCCTGCTGAAAAAATGCGATGTAAAAAAGACCAAAAACGGCGCCGCCTACTTAGATCTTGTACTGGGAGACAAAAGCGATGAGTTGCCTGCCAAGCTGTGGGACTATACGGACAACGGCCTGTTTGCCCCGGATATGGTGGTCAAGGTGCGGGGCACTGTGGAGCAGTATAACGGTCGGGATCAGTTCCGTATTTCTCAGATTCGCCCGGCAGCGGACAGCGACAACTACAACCTGTCCGATCTGGTGCCCGCCAGCGAGGTGGGCGGCGCCCAGATCTATGATATGCTGATGCGCCGGGTAAATGCCTTTCAGGACGCGGATTTTAAGGCCATTGTGTCCGGCATTATGGAGGACCATAAGGAGGCACTGGTGCGCTATCCTGCCGCCCTGCGGCTGCATCACGCCATAGTGGGCGGGTTGATGCTGCACACCGTGTCCATCGTGCGTCTGGCCGAATCTCTGTGCCAGATTTACCCCAATGTGGATAAAGAGCTGCTGCTCTCCGGCGCCATTCTCCACGATGTGGCCAAGACATGGGAACTGGAGGCGAACAACCTGGGGTTGGTCAAGGGCTATACCACCGAGGGTGAACTGATCGGTCACTTGGTCAAGGGCGCTATGTATATTGACGAAAAGGCACGCGACCTGGGCGTGGCACCGGAAAAGGCGGCACTGCTGGAACACATGCTGTTGTCCCACCACGGTCAGCCGGAGTACGGCTCCCCCGTGCGGCCCATGTTCCTGGAGGCGGAGATTCTCTCTCAGCTGGACGCATTGGACGCCACAATTTTTGAAATTCACGCTGCCACCTCCAAGGTGGAACCGGGCAAATTTACCGACCGGCAGTGGGCGCTGGACAATCGCAAGCTGTTTAACCACGGCCGCACCACCACCGAGCACAAGGTTAACTTAGGAGAATAACGCAATGGAAGTAACGCAAGAAAAGTGGACAGAGATCACCGTCACCGTCGATACAAAAGACATTGAGACCGCCGGCAACATTGCCAATATGGTGGTGCCTTACGGCATTTATATTGAGGACTACTCTGCTCTGGAAGAAGAGACCATGGAGATCGCCCATATTGATCTGATTGAGACGTCTCTGCTGCAAAAGGACCGCACCAAGGGCATTATCCACATTTATATCAGCCCGGAGGAGAACCCGGCAGAGGCCGTTTCTTTCTTAGAGGAGCGGCTGCAAAGCGCCGGTATCGCCTACACCCTGGGCACGGACCTGTGCGCCATGGAGGACTGGGTAAACAACTGGAAAAAATATTTTCACCCTATGCCGGTAGGCGACAAGCTGCTGATCCGCCCCACCTGGGAGGACGCAGACCCCACAGACGGCCGCAAGGTGCTGCACATTGAGCCGGGCCTGGCCTTTGGCACCGGGTCGCACCCCACCACCCGCCTGTGTCTGGAAACGCTGGAAAAGGTGGTCACCCCCGGCGCTACGGTACTGGACATCGGCTGTGGCAGCGGTATTCTTTCCATTGCCGCCCTACGGCTGGGTGCGCAAACTGCCTTTGGCGTAGATATTGACAAGCTGGCGGTCAAGACTGCCAACGCAAACGCATTGGAAAACGGATTTGGCGCAGACCGCTTTGTGGCCGTAGAGGGCAATTTGTCCGACAAAGTCAACGGGCAGTACGATATTATTGTAGCCAATATTGTGGCAGACATTATTATGCAGTTCAATCCCCAGGTGGCGCAGTTCTTAAAGCCCGGCGGCACCTACATTACCGGCGGTATTATCGATGTGCGGGAGGACGAGGTGCTGGCCTCTTTCGCCGCCAACGGCTTTACCGTGCAGCAGCGATTTGAGGACAAAGGCTGGCTGGTATTTGTATTAAAGCACGAATAAGTTCGGCCTCCACTGACCGAAAAAGCAGCCATCGGCAGTTGCAGACCCTACCGACTCTCTACGCTGTCCCATTACATCACACACAAAAACGCCCTGTACAAGCTGTACAGGGCGTTTGCGTTGCCGTTTTTTATTTTGCCTTCGTGGCAATCTCCTGGGTAATGCGGGCGATAAAGTCCTCAAGGCTGGAGGCACCCTCGTCGCCGTCCTTTCTGGAACGAACAGACACGGTGCCGGCCTCAATATCCTTGTCGCCGGCCACCAGCATATAGGGCACCTTCTCCATCTGCGCAGAGCGGATCTTAAAGCCGATCTTCTCGCTGCGGTCATCTACCTCGCAGCGAATACCGGCAGCCTCCAGCTTTGCCTTCACGGTGTTCAAATAGTCAATATGACGGTCCGCAATGGGCAGCAGCTTCACCTGCACCGGCGCCAGCCAGGTGGGGAACGCACCGGCAAAGTGCTCGGTCAAAATACCGATAAACCGCTCAATGCTGCCGAATACCACACGGTGGATCATAATGGGACGGTGCTTCTCGCCGTCCGCGCCCACATATTCCAACTCAAACCGCTCCGGCAGCTGGAAGTCCAGCTGAATGGTGCCGCACTGCCAGGTACGACCCAAACAATCGGTCAGGTGGAAGTCCAGCTTGGGACCGTAGAATGCGCCGTCGCCCTCGTTGACCTCAAAGTCATAGCCAAGCTCGGTAATGGCGTCCCGCAGGGCCTGGGTAGCAATGTCCCAGTCCTCCTTGGCGCCCATAGAGTCCTCCGGCTGGGTGGACAGTTCAATGTGATACTTAAAGCCAAAGGTGCTGTACACACTGTCGATCAGCTGTACCACGCCCTTGATTTCGTCCTTAATCTGCTCCCGGGTCATAAAGATGTGGGCATCGTCCTGGGTAAAGCAACGCACCCGCATCAGCCCATGCAGTGCGCCGGACAGCTCATGCCGGTGCACAATGCCCAGCTCGCCCATACGCAGAGGCAGATCCTTGTAGGAGTGCATTTTGTTCTTATACACCAAAATACCGCCGGGGCAGTTCATAGGCTTAATGGCAAAGTCCTCATCGTCAATAACGGTGGTGTACATATTCTCTTTATAGTGATCCCAGTGACCGCTGCGCTCCCACAGCTTGCGGCTGAGGATAATGGGGGTAGAGATCTCCTGATACCCGGCAGCCGTGTGAATCTGGCGCCAGTAGTCGATCAACTGGTTCTTGAGGATCATACCCTTGGGCAGGAAGAACGGGAACCCGGGGCCTTCCTCCATAATGGTAAACAGCTCCAGCTCCTTGCCCAACTTGCGGTGATCCCGCTTCTTGGCCTCCTCCAGCATTTGCAGGTGGGCCTCCAGCATAGACGCTTTGGGGAATGCAGTACCGTACACGCGGCAGAGCATTTTATTCTGGGCATCGCCCCGCCAGTAAGCGCCGGTGGTGTTGGTTAACTTAAAGGCCTTTACGGCGGCAATGCTCATCAGATGAGGACCGGCGCACAGCTCGGTAAACTCGCCCTGCTTGTAAAAGCTAATGTGCTCGCCCTTGCCGGCGTGCTCGGCGATCAGTTCTACCTTATACGGCTCGCCTTTCTCCTCCATCAGCGCCGTGGCCTCCGCCGGGGGCAGCTCAAAGCGCTCGATCTCCGGATTTTCCTTCACGATCTTCTTCATTTCCGCCTCGATCTTAACCAGATCGTCGGTGGTAAAGGGCGTGTCGCCGCAGTCGAAGTCATAATAAAAGCCGTTCTCAATGGCCGGGCCGATGGTCAGCTTCACCTGGGGATACAGGCGCTTAACCGCCTGGGCCATAATATGAGATGCGGTGTGGTTAAAGGTGCGGCGGCCGTCCTCCTCATCAAAGGTCAGCACTTCAAAGGCGCAGTCATCGCTGACGGTGGTGCGCAAGTCCCGCACCTGGCCGTTGATCCGGCAGCAGCAGGCTGCACGGTACAGACCCATAGAAATGTCCTTGGTAATGTCCGCCGCCGTCATAGGTGCGTCATACACCTTAACGGAGCCGTCCTTTAGCGTAATGTTCATAACAATTCCTCCAAAAAATAAAAAATCACCCTGCATACACAGGGTGAATGAAGATCCACGGTTCCACCTGAATTGCACAGCAAAATGCTGTACCTCAAGGCCCGGATAACGGCAGGCGACCGGCCGGTATTGGCGGCGCTCCGGGGTGGTAAGCGGCAGCTGCACCGTGTGCCCTTGCAGCGTACAGGCACTCTCTGAAAAACGGCAAAAAAGCGGCGCTCTTGTCCCCATCAAAGCTTTCTCTATCTCTTATGGCTTATAGTAGCACCTTTTACCGTCCCTGTCAACCGAAACGGCCGAATTTTTTGCCTTTTTCTCCGCCTCTGGCGCAAACAAAAACTTGACAGATACCATATATAGGTGTATTATTATACAGAAGTTTTACATTTTGTTATGTAAGGCTTCTTTACAGAAATGCGTTAAAATGTAATTAAACTGTACCTTTTCTGATGATATTCGATTCGAGAGTTCCATCTCAAAAACGAGAAATTTATGCAGAAGGAGGTGCTGTTGATTATGAGTAATGTTGTGATTCCGGTGATCGTAGGCGCGGTTTGCGCCGTTGTTTTTGCCGTTTTAGGTTTCGTTTTGGGTGTGGCGCATCGCCGCAAGACCGCAGAGAAAGAAATCGGCTCTGCCACCCAAGAAGCCACCAAGATCATCAATAACGCTTTGGCCGAGGCAGAAGCTTCTAAAAAAGAAAAAGTACTGGAAGCCAAGGACGAAGTGCACAAGCTCCGCTCCGACGCAGACCGGGATATCCGCGAGCGCAGGAACGAAGTGCAAAGACAGGAAAAACGCCTGAACCAGAGAGAAGAATATCTGGACAAAAAAGCGGATTCCCTGGAAGCAAAAAATGATAAAATCAGCGAAAAGCAAAAAGAACTTGAAAACAAATTACTCGAAGTCGATGGCATCAAGAAAAGCCAGTTTGATATGCTGGAGCGTATTTCAGGTCTGACCCAGGAGGAAGCAAAAAATCAACTGCTGGCCTCTCTGGAAGAAGAACTGGACACGGAAAAAAGCAAAAAAATCCTCGAATATGAGCAGATGACCCGGGACCAGAGTGAAGTGCTGGCGCGGGAGATCATCGGCACTGCCATTCAGCGCTGCGCCGCCGATCACACGGCAGAGACCACCGTCTCCGTTGTGGCACTGCCCAATGACGAGATGAAAGGCCGCATCATCGGCCGTGAGGGGCGCAACATCCGCTCCATTGAGTCCATTACCGGCGTTGAATTGATCATTGACGACACGCCGGAAGCCATCACCGTCAGCGCCTTTGACCCGGTGCGCAGAGAGATTGCCCGCCTGACCCTGGAGCGACTGATCCAGGACGGCCGCATTCATCCCACCCGCATTGAGGAGCTGTACGAAAAGGCCAAGCGCGAGGTAAATGCCACCATTAAGCAGGAGGGCGAGAAGGCTGTACTGAAAGCCAACTGCGGCTCCATTCACCCGGAGCTGGTGCGCCTGCTTGGTAAATTGAAATACCGTACTTCCTACGGCCAGAGCGTGCTCAAGCACAGCCTGGAAGTGAGTTATATTGCCGGGCTGATGGCTGCGGAACTGGGTGCTGATGAGCGACTGGCCCGCCGCGCAGGTCTGCTGCACGACATCGGCAAGGCTTTGGATCACGAGATGGAAGGCAGCCATATTGCCCTGGGCGTGGAATTTGCCCGCAAGTATAAAGAGAGCGAAGCCGTTGTGCACGCCATTGAGGCGCATCACGGTGATGTAGAGTGCAAGACCGTGGTCGCCTGCCTGGTTCAGGCGGCAGACGCCGTATCTGCCTCCCGTCCCGGCGCCCGCCGTGAGAATGTGGAGAACTACATTAAGCGCCTGCAACAGCTGGAGGAGATCTCTTGCAGCTTTGAGGGCGTGGAGCGCGCTTACGCCATACAGGCCGGCCGTGAGGTCCGCGTGATGGTAAAACCGGAAGTGGTATCCGACAGCCGTATGCCTTTTGTGGCCCACGAGATTGCCAAGAAGATCGAGTCCGAGATGGAATACCCCGGCCAGATCAAGGTCAATATTATTCGTGAGTCCCGTGCTTCCGATGTGGCAAAATAACAAACAAAAGGGACGGTCTTTCCGTCCCTTATTTTTTTGGAGGAATCGCAATGATCAAACATATTGTATGCTTTAAGCTGGCTGACCCCACCTCGGCAAATTGCCAAAAGGCAGCGGAAGTGCTCCGCTCCATGGACGGCAATGTACCGCT
[truncated: 18,897,648 more chars]
